# Supplementary material for: Diet-responsive proteogenomic effects following short-term restriction of animal products in humans
Source: Research Square preprint supplement (doi:10.21203/rs.3.rs-7213009/v1), 2025-08-27
Supplement: Supplementary file 1 [file 04ab5e66a04c229129ce8b33.docx]

**Supplementary Data**

|  | **Total (N=411)** | **PR (N=200)** | **NR (N=211)** | ***P*-value** |
| --- | --- | --- | --- | --- |
| Sex |  |  |  |  |
| *Female* | 224 (54.5) | 108 (54) | 116 (55) | 0.8425 |
| *Male* | 187 (45.5) | 92 (46) | 95 (45) |
| Age (yrs) | 48.1 ± 13.6 | 51.5 ± 13.5 | 45.0 ± 13.1 | <0.00001 |
| BMI (Kg/m2) | 27.3 ± 4.6 | 28.4 ± 4.6 | 26.2 ± 4.4 | <0.00001 |
| Blood Pressure (mmHg) |  |  |  |  |
| *Systolic BP (SBP)* | 124 ± 19.4 | 127 ± 19.0 | 121 ± 19.7 | 0.003 |
| *Diastolic BP (DBP)* | 79 ± 11.3 | 80 ± 10.8 | 78 ± 11.8 | 0.04 |
| Education |  |  |  |  |
| *Tertiary* | 293 (71.3) | 134 (67) | 159 (75.4) | 0.0612 |
| *Primary and Secondary* | 118 (28.7) | 66 (33) | 52 (24.6) |
| Marital status |  |  |  |  |
| *Married* | 286 (69.6) | 147 (73.5) | 139 (65.9) | 0.0931 |
| *Unmarried* | 125 (30.4) | 53 (26.5) | 72 (34.1) |  |
| Smoking (Y/N) |  |  |  |  |
| *Non-smokers* | 328 (79.8) | 187 (93.5) | 141 (66.8) | <0.00001 |
| *Smokers* | 83 (20.2) | 13 (6.5) | 70 (33.2) |
| Parental origin |  |  |  |  |
| *Northern Greece* | 275 (66.9) | 137 (68.5) | 138 (65.4) | 0.0979 |
| *Central or Southern Greece* | 32 (7.8) | 11 (5.5) | 21 (9.9) |

**Supplementary Table 1. Sociodemographic traits and geographic origin of study participants.** FastBio population sample has been described in detail in1.Continuous variables were expressed as mean ± standard deviations and categorical variables as N (%); SBP = Systolic Blood Pressure; DBP = Diastolic Blood Pressure; P-values are from chi-square test or Mann-Whitney test for categorical and numerical variables, respectively.


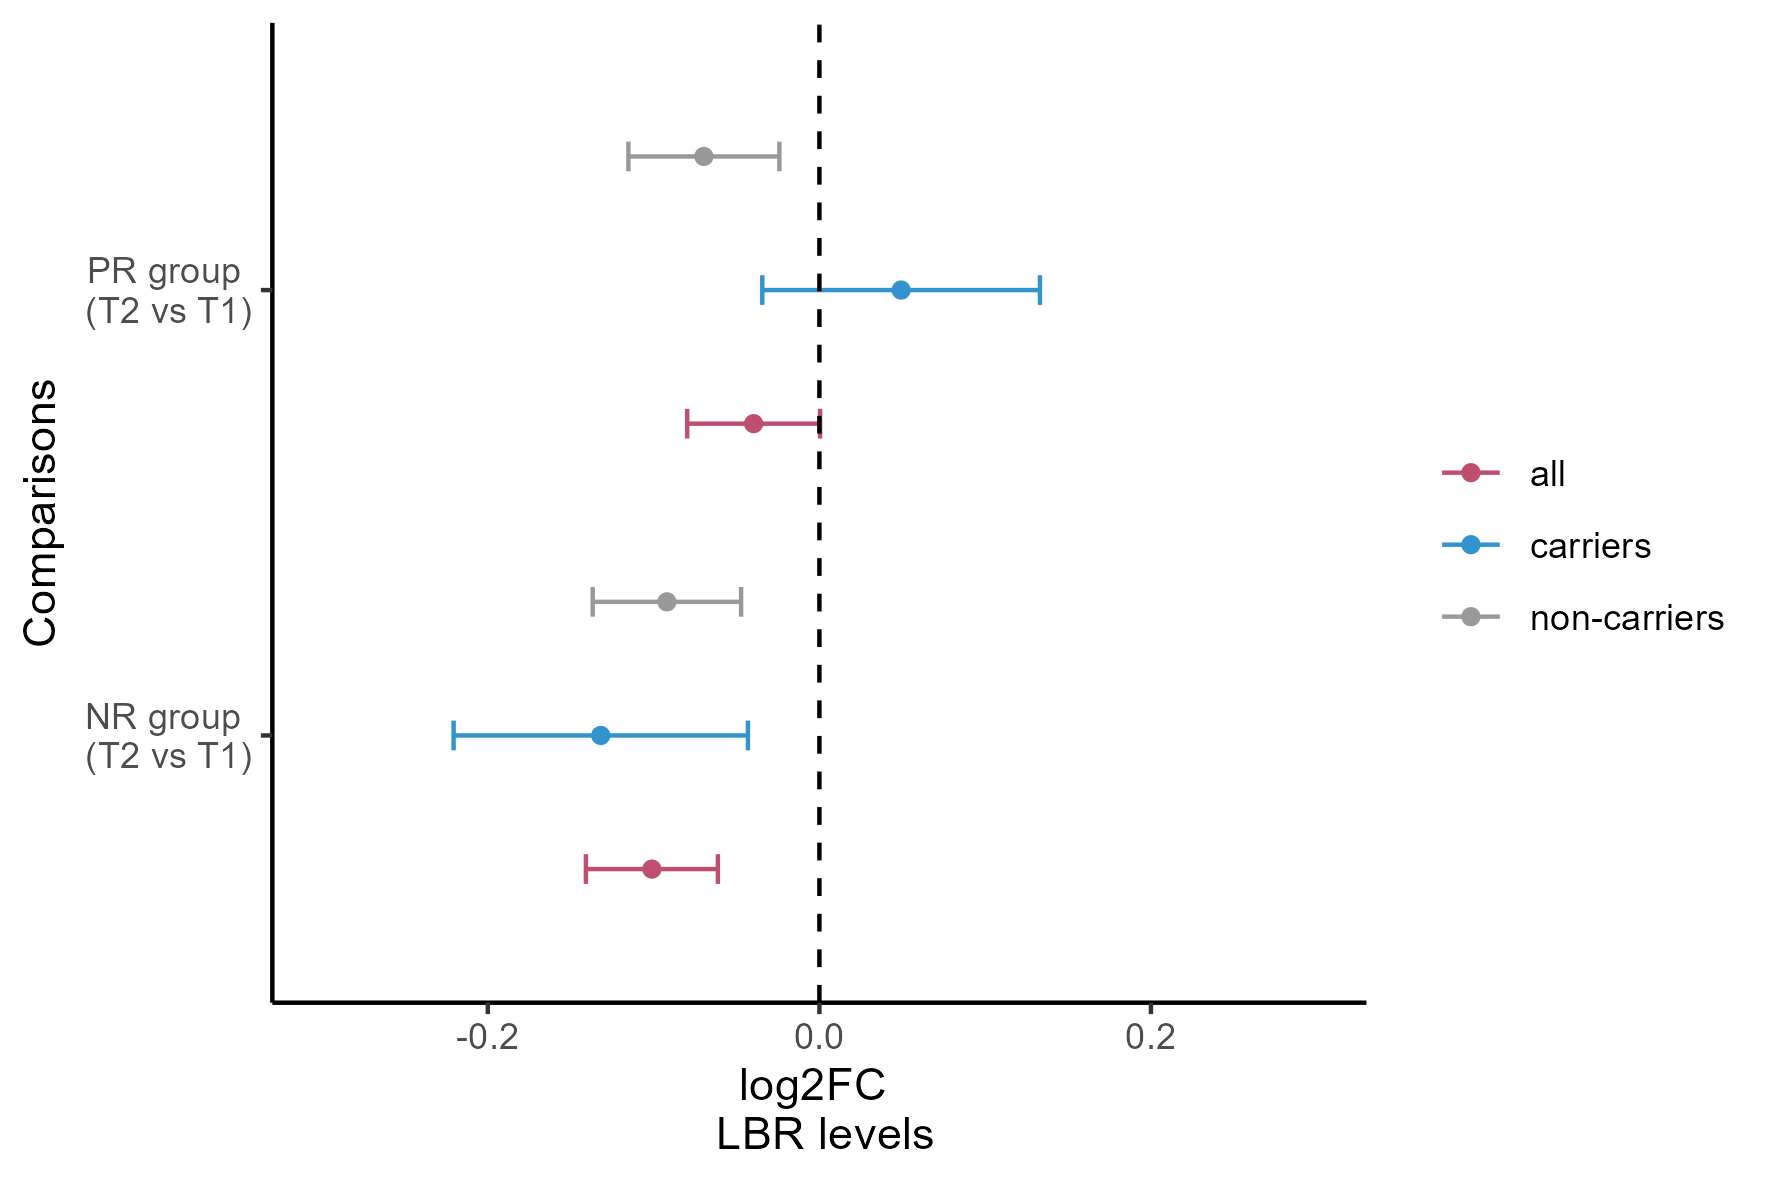


**Supplementary Figure 1. Differential abundance analysis of LBR stratified by diet-responsive C allele carriers at rs74148404**. Differential abundance analysis on LBR levels using limma model adjusting for mean protein levels, age2, sex, BMI and medication use. Point estimates represent the log2(FoldChange) (T2 vs T1) and the error bars the 95% confidence intervals. Color refers to the subset of individuals used in the analysis, red represents the reference analysis using all individuals (n = 385); grey represents a subset analysis excluding carriers of the differential cis-pQTL associated with LBR rs74148404 (n =293); blue represents the subset analysis including only carriers of the differential cis-pQTL associated with LBR rs74148404 (n = 92).


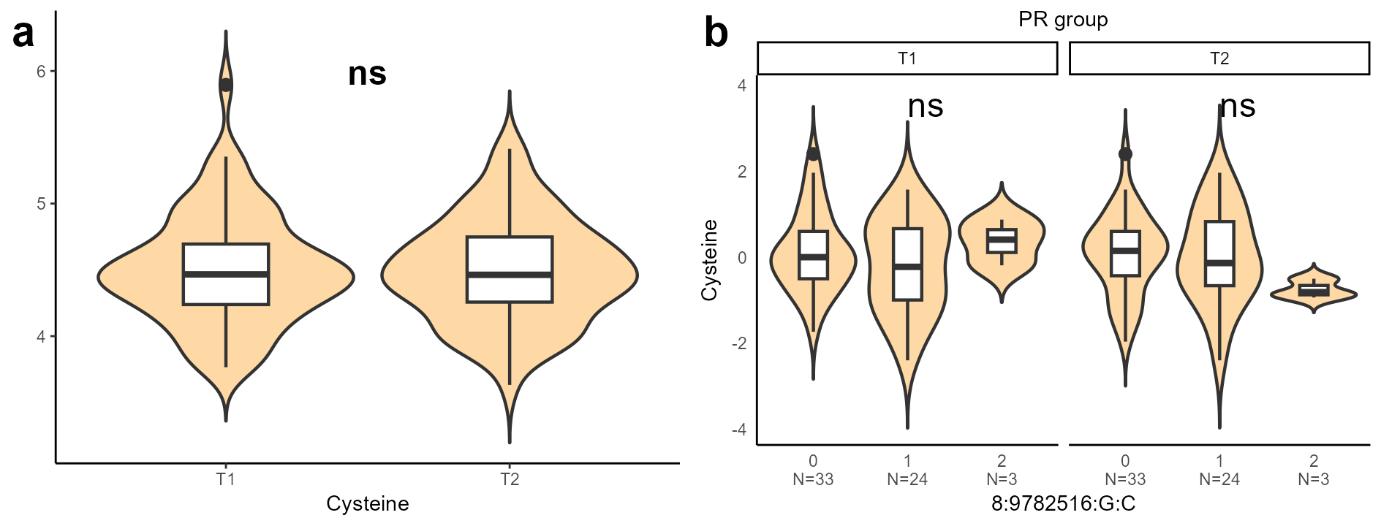


**Supplementary Figure 2. Distribution of cysteine levels in PR individuals and association testing with MSRA diet-responsive cis-pQTL.** Effects of dietary restriction did not extend to cysteine levels. **a,** Distribution of cysteine levels in PR individuals (n = 60) at both time points; **b,** Dosage effect of differential cis-pQTL 8:9782516:G:C (rs74891397) associated with MSRA on plasma cysteine residuals in PR individuals (n = 60). Asterisks in panel **a** indicate significance as *: p < 0.05; ** p < 0.01; *** p < 0.001 (paired t-test); ns = non-significant. Asterisks in panel **b** indicate significance as *: p < 0.05; **: p < 0.01; ***: p < 0.001 (linear model). PR: periodically restricted group; NR: non-restricted group; T1: time point 1; T2: time point 2; p = p-value.


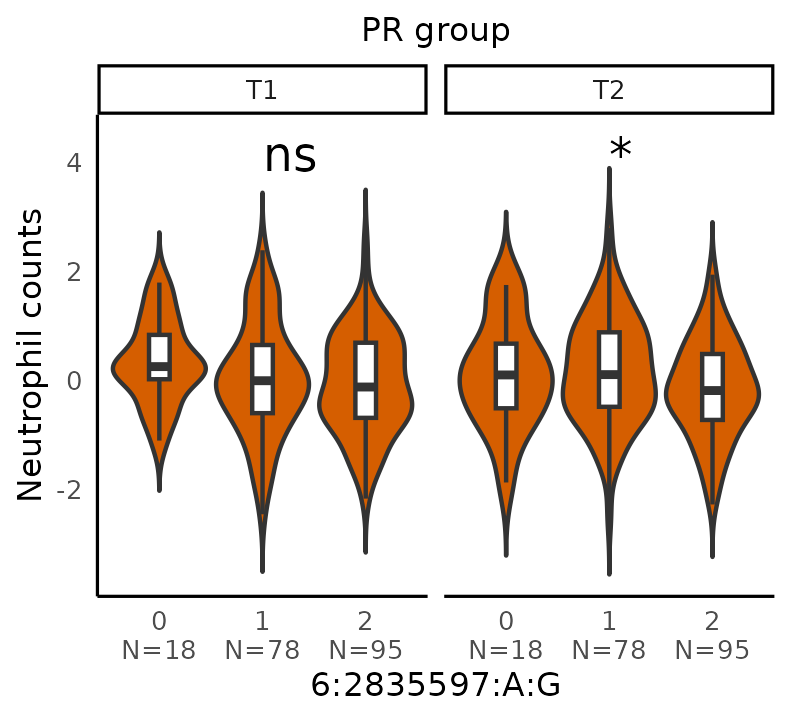

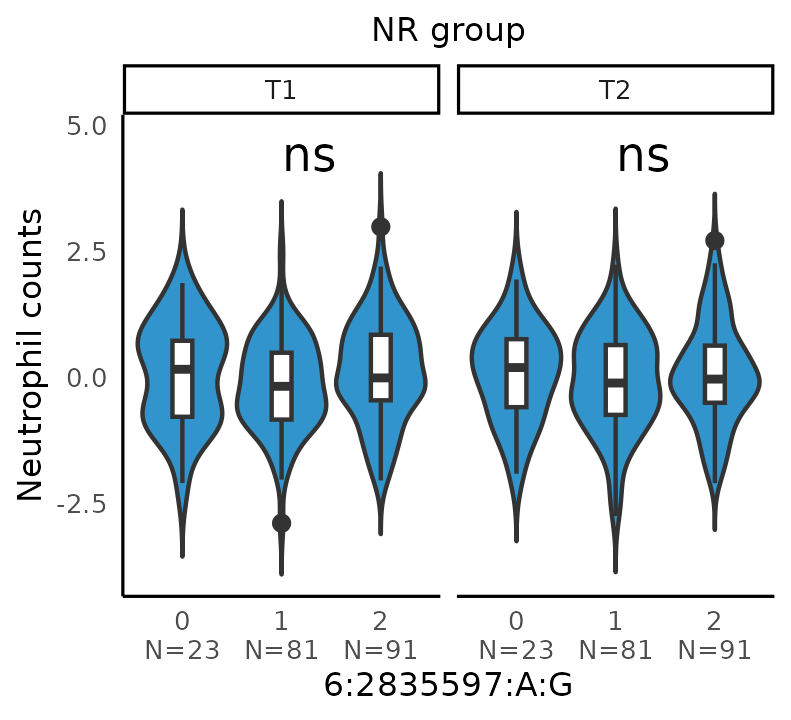


**Supplementary Figure 3. Association of SERPINB1 differential cis-pQTL rs2293772 with neutrophil counts**. Violin plot depicting the dosage effect of differential cis-pQTL 6:2835597:A:G (rs2293772) associated with SERPINB1 levels on the residuals of neutrophil counts in dietary group and time point. Asterisks indicate significance as *: p < 0.05; **: p < 0.01; ***: p < 0.001 (linear model); ns = non-significant. PR: periodically restricted group; NR: non-restricted group; T1: time point 1; T2: time point 2; p = p-value.


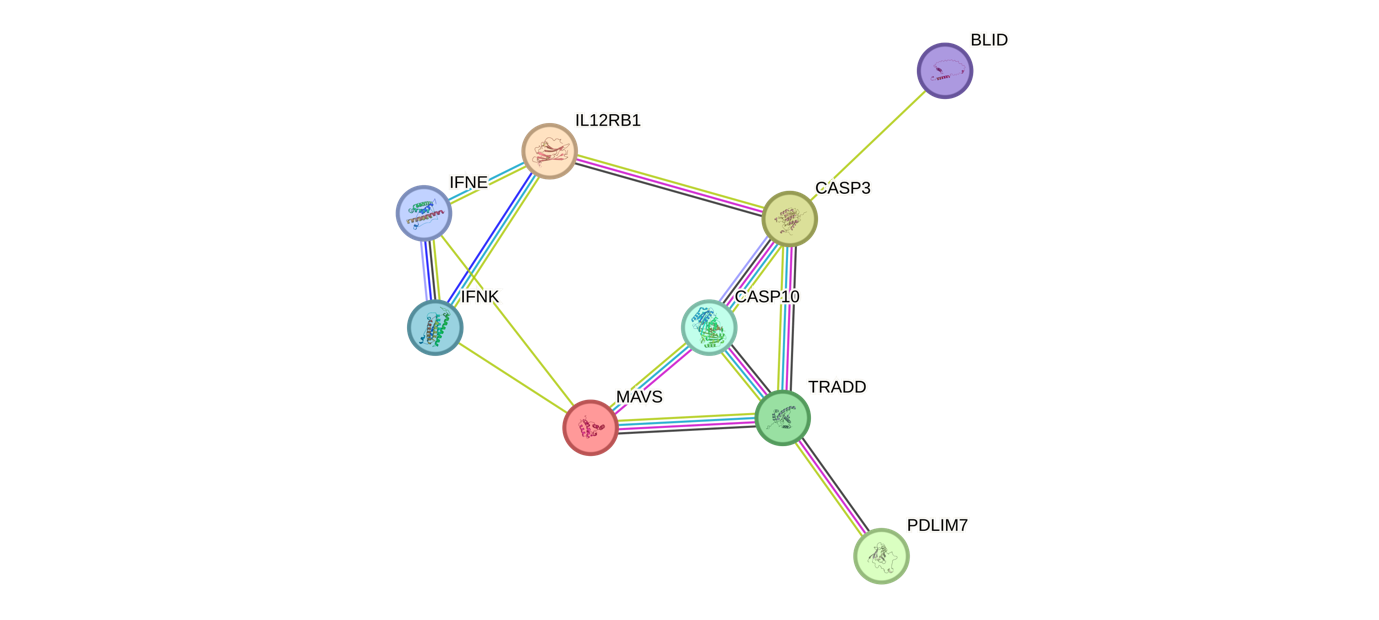


**Supplementary Figure 4.** **Protein-protein interaction network of proteins associated with differential cis-pQTLs unique to the control group**. The interaction network was produced by STRING (version 12.0) showing the connection of all proteins with differential cis-pQTLs unique to the control (NR) group (IL12RB1; MAVS; CASP3; PDLIM7).

# References

1. Rouskas, K. *et al.* Periodic dietary restriction of animal products induces metabolic reprogramming in humans with effects on cardiometabolic health. *npj Metab Health Dis* **3**, 14 (2025).
