# Supplementary material for: Diet-responsive proteogenomic effects following short-term restriction of animal products in humans
Source: Research Square preprint supplement (doi:10.21203/rs.3.rs-7213009/v1), 2025-08-27
Supplement: Supplementary file 2 [file 3962c3aef9186d6535c718a7.xlsx]

## Sheet: S Table 2
S Table 2. Summary statistics of steady-state cis-pQTL mapping, reporting top cis-pqtls.
Abbreviations: phenotype_id = HGNC symbol of the tested protein; variant_id = chr:hg38pos:ref.allele:alt.allele; num_var = number of cis variants tested; start_distance = distance of the variant_id from the TSS of the corresponding protein; af = allele frequency of the alt.allele; pval_nominal = nominal p-value of the regression coefficient of the variant_id; slope = regression coefficient of the…
phenotype_id	variant_id	num_var	start_distance	af	pval_nominal	slope	slope_se	pval_perm	qval	pval_nominal_threshold	context	rsid
AARSD1	17:42939605:C:T	2317	-24850	0.276923	0.00141996	0.248308	0.0765917	0.29607	0.193781	0.000526232	NR1	rs566168
ABHD14B	3:51012575:C:A	1710	-961475	0.230769	0.000108926	-0.380311	0.0960523	0.020298	0.025636	0.000916906	NR1	rs62257841
ABL1	9:131131094:T:G	3599	295839	0.179487	0.00588376	-0.325787	0.116847	0.959704	0.390619	0.000179598	NR1	rs2281905
ACAN	15:88347912:A:G	3515	-455525	0.197436	0.000908203	0.341743	0.101258	0.388561	0.225358	0.000232333	NR1	rs12908497
ACP5	19:11601693:A:C	3180	24047	0.135897	4.03656e-06	-0.514067	0.108014	0.00179982	0.00348256	0.000380526	NR1	rs9789280
ACP6	1:147652507:T:G	1770	-18018	0.694872	2.13209e-30	1.03641	0.0740585	9.999e-05	3.19313e-23	0.000812928	NR1	rs2153463
ACTA2	10:88017202:C:T	3976	-935572	0.0435897	0.00308204	-0.559467	0.186428	0.772323	0.342384	0.000246474	NR1	rs114894790
ACVRL1	12:51920060:C:T	4405	12555	0.0769231	2.76048e-07	0.582013	0.108866	0.00049995	0.000750191	0.000200899	NR1	rs74094825
ACY1	3:52012813:C:T	1717	29277	0.115385	0.000509	-0.302983	0.0855483	0.0738926	0.0727357	0.000925409	NR1	rs74960480
ADA	20:44542359:G:A	3567	-109341	0.0948718	3.63948e-11	0.935305	0.132422	9.999e-05	3.10635e-07	0.000231433	NR1	rs11696619
ADA2	22:16853162:T:C	2914	-366274	0.758974	0.000431866	-0.26583	0.0740905	0.219378	0.159691	0.000211668	NR1	rs175155
ADAM15	1:155060832:G:A	2242	9515	0.235897	4.50754e-22	0.936426	0.0842748	9.999e-05	2.83298e-16	0.00035889	NR1	rs11589479
ADAM22	7:87935182:C:G	2907	930	0.541026	1.14915e-13	-0.558461	0.0693216	9.999e-05	2.29259e-09	0.000558031	NR1	rs2279542
ADAM23	2:206213576:A:G	3463	-229957	0.266667	1.02277e-05	0.409467	0.0901129	0.00849915	0.0142684	0.000255198	NR1	rs6758395
ADAM8	10:133269306:C:T	2730	-7563	0.884615	7.81649e-11	-0.718531	0.103743	9.999e-05	7.55464e-07	0.00029674	NR1	rs2995310
ADAMTS13	9:133532918:G:A	4569	110550	0.0564103	7.8613e-05	-0.759154	0.187741	0.0819918	0.0779273	0.000149217	NR1	rs112155122
ADAMTS15	11:130634463:C:A	3705	185817	0.0641026	0.00223313	-0.43881	0.14142	0.747725	0.336819	0.000160972	NR1	rs35281186
ADAMTS16	5:5477082:C:T	4209	336751	0.7	0.00999658	0.239564	0.0919922	0.992101	0.39839	0.000180152	NR1	rs2578559
ADAMTS8	11:130388921:C:T	3728	-39689	0.748718	8.02351e-05	0.420997	0.104249	0.0664934	0.0689315	0.000168513	NR1	rs4937511
ADGRB3	6:68961693:A:G	5171	326410	0.7	3.07998e-33	-1.05924	0.0707109	9.999e-05	6.84331e-25	0.000351794	NR1	rs3798969
ADGRE2	19:14394936:C:G	4204	-383625	0.251282	1.11178e-05	0.305765	0.0675836	0.0113989	0.0155351	0.000184738	NR1	rs12973667
ADGRE5	19:14453307:C:G	3480	71862	0.141026	0.00115702	-0.258008	0.0781035	0.516848	0.272843	0.000190066	NR1	rs7247539
ADGRG1	16:57825500:C:T	4027	196869	0.120513	0.00025347	0.434181	0.11625	0.189581	0.147444	0.000156713	NR1	.
ADH4	4:98802518:T:C	3872	-341780	0.353846	0.00145624	-0.212958	0.0658428	0.428457	0.243385	0.000326118	NR1	rs7696219
ADM	11:11100760:C:G	4785	795686	0.279487	0.0012898	-0.243592	0.0744718	0.544346	0.279312	0.000226935	NR1	rs4396282
AFP	4:72866034:G:A	2669	-570188	0.0974359	0.000317372	-0.58302	0.158714	0.0683932	0.0722799	0.000684435	NR1	rs115346984
AGER	6:32963018:T:C	12609	778764	0.0487179	0.000241456	-0.700001	0.186763	0.274073	0.184464	0.00021887	NR1	.
AGR2	7:15873963:A:C	5015	-931037	0.64359	0.000887598	0.317317	0.0938335	0.535546	0.277121	0.00017742	NR1	rs38205
AGRN	1:1025561:G:C	1599	5440	0.312821	7.99933e-10	-0.477708	0.0734956	9.999e-05	2.64831e-06	0.000620984	NR1	rs3121554
AGRP	16:68226219:G:A	1536	742671	0.0615385	0.0139245	0.452786	0.182277	0.675232	0.316772	0.0013045	NR1	rs74625559
AGXT	2:240806304:A:C	5153	-62521	0.438462	4.10323e-05	-0.362845	0.0862316	0.0427957	0.0485148	0.000166411	NR1	rs5027087
AHSP	16:30612658:T:G	1220	-915243	0.420513	0.0343444	0.202123	0.0947782	0.892211	0.374533	0.0013401	NR1	rs67693285
AK1	9:127798788:C:T	2158	-78888	0.497436	0.00560814	-0.229517	0.0818426	0.652635	0.312327	0.000540062	NR1	rs7033913
AKR1B1	7:134809158:C:T	3864	350057	0.292308	0.00167995	-0.347985	0.109057	0.451955	0.254978	0.000342812	NR1	rs3778847
AKT1S1	19:49869505:G:A	3237	-7851	0.128205	0.001467	0.343444	0.10626	0.60144	0.297404	0.000170923	NR1	rs2353005
ALCAM	3:104624910:G:A	4400	-742000	0.320513	0.00692765	0.175152	0.0641006	0.907409	0.376696	0.000333504	NR1	rs17797712
ALDH1A1	9:72285178:T:C	3142	-667876	0.661538	0.00545857	0.138924	0.0493781	0.778322	0.343153	0.000465978	NR1	rs7856906
ALPP	2:232462498:G:A	3776	83746	0.525641	3.8768e-09	0.421832	0.0680228	9.999e-05	2.52755e-05	0.000263861	NR1	rs4521030
AMBN	4:70590397:G:A	3755	-1860	0.0923077	0.000194681	-0.6204	0.163002	0.0722928	0.0736081	0.000407787	NR1	rs35575397
AMBP	9:114127883:C:G	4134	49582	0.284615	7.12094e-05	0.313503	0.0770482	0.0616938	0.0652641	0.000149534	NR1	rs2839874
AMIGO2	12:47876813:T:C	4209	796853	0.876923	0.000344099	0.504905	0.138288	0.194081	0.149605	0.000239777	NR1	rs6580642
AMN	14:102547712:T:A	2933	-374952	0.766667	0.000279268	-0.446063	0.120282	0.108589	0.0954849	0.000438378	NR1	rs4906221
AMY2A	1:103497405:T:A	3774	-120023	0.261538	0.000136968	-0.396929	0.101791	0.0455954	0.0510026	0.000662787	NR1	rs4244372
AMY2B	1:103497405:T:A	3665	-74185	0.261538	2.24943e-05	-0.436227	0.100155	0.00909909	0.0136135	0.000628202	NR1	rs4244372
ANG	14:20684445:C:A	3971	-4320	0.102564	5.77558e-09	0.588816	0.0961395	9.999e-05	2.92623e-05	0.000128625	NR1	rs28589501
ANGPT1	8:107793457:T:C	4128	295538	0.0717949	0.0150542	-0.183859	0.0748867	0.982402	0.396377	0.000362969	NR1	rs76729432
ANGPT2	8:5604414:C:T	6940	-958832	0.3	0.00092071	-0.385207	0.114272	0.654535	0.312327	0.000121568	NR1	rs4875599
ANGPTL1	1:178859463:T:G	4134	-11615	0.112821	7.65742e-05	-0.531597	0.131247	0.0384962	0.0455102	0.000466634	NR1	rs12125050
ANGPTL2	9:126697383:G:T	3026	-425253	0.0897436	0.000621849	-0.567989	0.162995	0.259174	0.178286	0.000305874	NR1	rs28687510
ANGPTL3	1:62437688:T:C	3812	-159833	0.246154	0.00158029	-0.212143	0.066098	0.579142	0.287389	0.000237497	NR1	rs9436221
ANGPTL4	19:8050573:G:A	4237	-313583	0.123077	0.00111106	0.400622	0.120834	0.547645	0.279009	0.00016873	NR1	rs3136647
ANGPTL7	1:11052779:T:C	3163	-136577	0.723077	2.95284e-05	0.353326	0.0823774	0.0169983	0.0248891	0.000264797	NR1	rs1884429
ANKRD54	22:37148562:G:A	3203	-695773	0.469231	9.4964e-05	0.356635	0.0892705	0.0652935	0.0656898	0.000198356	NR1	rs2284035
ANPEP	15:89815788:G:T	3991	935	0.223077	5.76659e-07	-0.320819	0.061821	0.00049995	0.00103887	0.00030165	NR1	rs28565347
ANXA10	4:167729540:G:T	3722	-362998	0.315385	0.00063716	0.338904	0.0974498	0.284072	0.187682	0.00024807	NR1	rs2319491
ANXA3	4:78048770:A:G	3320	-503001	0.248718	8.21103e-06	-0.398362	0.0866863	0.00319968	0.0064599	0.00041104	NR1	rs35234380
ANXA4	2:68880578:G:A	3749	-861557	0.135897	0.00203579	-0.432593	0.138134	0.573743	0.286454	0.000374147	NR1	rs12987243
AOC3	17:42852620:G:A	2218	1420	0.0794872	2.85678e-07	-0.538356	0.100836	0.00019998	0.000322119	0.000553205	NR1	rs33986943
APBB1IP	10:26971957:C:T	5477	533615	0.112821	0.000129624	0.59018	0.150789	0.0705929	0.0708639	0.0002907	NR1	rs7095817
APEX1	14:20456995:T:G	3390	1768	0.410256	2.09979e-07	-0.372722	0.0689774	0.00019998	0.000623134	0.000138031	NR1	rs1130409
APLP1	19:35175452:A:G	3208	-693123	0.0564103	0.0119795	-0.374261	0.147399	0.979302	0.396099	0.000307473	NR1	rs56370249
APOH	17:66214462:A:C	4304	-14954	0.0461538	1.12085e-14	-1.65291	0.195798	9.999e-05	2.98585e-10	0.000230785	NR1	rs1801689
APOM	6:32140074:G:A	11077	484179	0.0820513	0.0011627	0.321754	0.0974432	0.649635	0.311408	0.000272258	NR1	.
APRT	16:88780441:C:A	4928	-31488	0.251282	4.02352e-05	0.305249	0.0724597	0.0432957	0.0499222	0.000182852	NR1	rs9932423
AREG	4:75243084:T:G	3669	797947	0.941026	0.000384101	0.7844	0.216648	0.122688	0.110034	0.000399991	NR1	rs10000685
ARG1	6:132022667:C:T	3667	449440	0.0615385	9.0231e-05	-0.583448	0.145564	0.0547945	0.0605321	0.000344225	NR1	rs74676040
ARHGAP1	11:46243962:G:T	2078	-456658	0.233333	0.00252988	0.365988	0.119458	0.39626	0.227493	0.000739935	NR1	rs12223774
ARHGAP25	2:69142857:A:C	3707	408045	0.0487179	0.000185427	-0.895191	0.234397	0.10449	0.0956531	0.000260881	NR1	rs115308740
ARHGEF12	11:120101298:G:A	3834	-235116	0.0615385	0.000122382	-0.706817	0.179897	0.090091	0.0846981	0.000215251	NR1	rs61900461
ARSA	22:50162817:C:G	2677	-465336	0.135897	0.000675947	0.432224	0.124893	0.29917	0.193781	0.000284275	NR1	rs730340
ARSB	5:78991756:T:G	3436	6445	0.625641	3.00533e-09	-0.558687	0.0893892	9.999e-05	1.26859e-05	0.000275609	NR1	rs336526
ART3	4:76104657:G:A	4853	29947	0.14359	1.31029e-06	0.32789	0.0654325	0.00109989	0.00220493	0.000292367	NR1	rs17224545
ASAH2	10:50246241:G:T	2761	-5276	0.633333	5.08921e-10	0.567758	0.0862343	9.999e-05	2.95254e-06	0.000440645	NR1	rs2842124
ASGR1	17:7071801:T:A	3725	-107570	0.658974	0.000872608	0.26446	0.0780879	0.472653	0.257236	0.000184005	NR1	rs7223384
ATOX1	5:152117752:A:G	4830	359120	0.489744	0.00147557	-0.238338	0.073781	0.518148	0.272843	0.000272231	NR1	rs153531
ATP5IF1	1:28257988:G:A	2180	21863	0.320513	3.73648e-05	0.432483	0.102216	0.0112989	0.0174187	0.000605742	NR1	rs12408077
AXL	19:41317081:T:C	2837	97857	0.251282	0.00362667	-0.163901	0.0555877	0.714729	0.330612	0.000296626	NR1	rs8109627
AZU1	19:783869:G:A	2746	-43969	0.25641	0.00167554	0.274941	0.0861435	0.708329	0.32815	0.000138656	NR1	rs111603971
B4GALT1	9:33103175:G:T	4067	-64162	0.525641	2.48055e-05	-0.289956	0.0669375	0.0162984	0.0220065	0.000310058	NR1	rs544723
B4GAT1	11:66313740:G:C	1807	-33890	0.241026	0.00102311	-0.262688	0.0786511	0.192781	0.148587	0.00068207	NR1	rs10791867
BAG3	10:119861867:C:A	4129	210486	0.192308	0.000123988	0.418983	0.106731	0.0926907	0.0859081	0.000198713	NR1	rs35000882
BAG6	6:31490975:G:A	11066	-161687	0.0897436	4.59364e-05	-0.594734	0.142293	0.0668933	0.071094	0.000318665	NR1	.
BAIAP2	17:80509676:G:C	4428	-525476	0.666667	0.00119875	-0.328667	0.0998124	0.539346	0.277713	0.000194857	NR1	rs7212056
BANK1	4:101720855:C:T	3533	-69876	0.361538	5.15769e-05	0.355631	0.085682	0.0265973	0.0317946	0.00040345	NR1	rs12501586
BCAM	19:44853207:T:A	3598	44103	0.284615	3.71522e-05	-0.313422	0.0740519	0.0281972	0.0365016	0.000213451	NR1	rs73050205
BCAN	1:156661854:G:C	3012	19736	0.715385	0.00119463	-0.247821	0.0752367	0.358664	0.214627	0.000330035	NR1	rs7531203
BCL2L11	2:111512621:T:C	1904	391706	0.594872	0.00397553	0.275055	0.0942424	0.612439	0.298722	0.000505967	NR1	rs11686057
BCR	22:23399918:G:A	2693	219408	0.792308	0.0107487	0.298673	0.115844	0.954805	0.389639	0.000322886	NR1	rs2003752
BLMH	17:30244910:C:T	2068	-47035	0.297436	2.60407e-12	0.599535	0.0796652	9.999e-05	2.12784e-08	0.000862799	NR1	rs12945042
BLVRB	19:39899656:G:A	3522	-566090	0.305128	1.12219e-06	-0.310857	0.0616154	0.0009999	0.00196831	0.000289488	NR1
BMP4	14:53727615:A:G	3732	-229211	0.582051	0.00533161	0.261979	0.092855	0.881012	0.369656	0.000300037	NR1	rs1841144
BMP6	6:6799829:C:A	5201	-926271	0.192308	0.00142347	-0.387805	0.119648	0.666033	0.313442	0.000167745	NR1	rs62392021
BOC	3:112922354:T:C	3581	-289204	0.0615385	0.000214191	-0.604974	0.160028	0.10229	0.0928077	0.000319777	NR1	rs75286541
BPIFB1	20:33106254:C:T	2542	-176961	0.653846	2.8325e-05	-0.395689	0.0920355	0.010499	0.0168931	0.000521278	NR1	rs2424961
BRK1	3:10135762:T:C	3367	20086	0.133333	0.00346313	-0.399194	0.134705	0.880712	0.370066	0.000171018	NR1	rs6781436
BSG	19:378537:C:T	2412	-194060	0.320513	0.00168085	0.275279	0.0862755	0.658134	0.313159	0.000171708	NR1	rs8103626
BST1	4:15645451:A:G	4148	-57615	0.120513	2.40947e-30	-1.53327	0.109706	9.999e-05	3.92594e-23	0.000218553	NR1	rs7683000
BST2	19:17301409:C:T	3643	-104222	0.0615385	0.00380335	0.55023	0.187597	0.872413	0.367326	0.000194126	NR1	rs3745186
BTN2A1	6:26361202:C:T	3728	-96754	0.274359	2.71458e-05	0.218634	0.0507304	0.0127987	0.0209361	0.000587269	NR1	rs4712981
BTN3A2	6:26353872:G:T	3851	-11327	0.0615385	5.71797e-11	-1.16354	0.166642	9.999e-05	8.00282e-07	0.000427932	NR1	rs67509210
C19orf12	19:29780631:A:G	4625	65369	0.14359	0.00313221	-0.382762	0.127766	0.841216	0.358305	0.000194238	NR1	rs62107107
C1QA	1:22639997:G:A	3725	3368	0.0923077	0.000211338	-0.638209	0.168658	0.133087	0.113251	0.000259137	NR1	.
C1QTNF1	17:78297109:G:A	4212	-727061	0.438462	0.00234957	-0.221297	0.0716872	0.890011	0.373384	0.000101542	NR1	rs12936704
C2	6:31947367:G:A	12649	19649	0.0641026	7.62277e-05	-0.505163	0.124685	0.114589	0.103258	0.000292683	NR1	.
C2CD2L	11:119805591:G:A	3676	698246	0.210256	0.000247559	0.481168	0.12861	0.131587	0.111754	0.000285033	NR1	rs7118694
C4BPB	1:207079820:A:G	2519	-9041	0.558974	7.4242e-05	0.375639	0.0925615	0.0313969	0.0410794	0.000379226	NR1	rs3748672
CA1	8:85523080:G:A	2305	144966	0.0435897	0.0150235	0.292796	0.11922	0.811019	0.35217	0.000803996	NR1	rs74603761
CA11	19:47821465:C:A	4165	-824723	0.364103	0.00115245	0.332359	0.100575	0.529347	0.275771	0.000193962	NR1	rs10410589
CA12	15:63455423:C:G	3527	73576	0.182051	2.04751e-05	-0.489822	0.111875	0.0136986	0.0213349	0.000329467	NR1	rs8035085
CA13	8:85307806:T:C	2194	62347	0.597436	0.00368351	0.299167	0.101638	0.393461	0.225856	0.00091645	NR1	rs1553017
CA14	1:151131061:C:T	1525	873286	0.925641	0.000446001	-0.467608	0.130658	0.0635936	0.0662956	0.000990266	NR1	rs7528275
CA2	8:85189216:T:A	2360	-274792	0.802564	0.00236524	0.174918	0.0567014	0.287671	0.188302	0.000903014	NR1	rs4150880
CA3	8:85402626:G:A	2338	-36234	0.692308	0.00335365	0.236077	0.0793847	0.370163	0.217897	0.00083996	NR1	rs10087278
CA4	17:60422864:T:G	1659	272890	0.0871795	9.35712e-08	-0.712538	0.127905	9.999e-05	0.000107324	0.00085341	NR1	rs62082086
CA5A	16:87882686:G:C	5390	-53844	0.246154	3.90135e-15	0.699768	0.0812313	9.999e-05	3.71996e-10	0.000127823	NR1	rs72816308
CA6	1:8974539:A:G	2998	28670	0.428205	9.36378e-14	0.603478	0.0745925	9.999e-05	2.24875e-09	0.000263964	NR1	rs3765963
CA9	9:35940555:G:A	2733	266626	0.34359	0.00361634	-0.234844	0.0796233	0.692031	0.321212	0.000382756	NR1	rs13291644
CALB1	8:89840737:G:A	2605	-242143	0.425641	0.00155315	-0.309351	0.0962274	0.244576	0.173861	0.000706983	NR1	rs404146
CALB2	16:70642631:A:G	2745	-716093	0.120513	0.000652872	0.49685	0.143154	0.20298	0.154032	0.000512771	NR1	rs9934599
CALCA	11:15670975:A:G	2946	698623	0.217949	0.000736115	-0.362852	0.105598	0.244976	0.171442	0.000334059	NR1	rs1484423
CALCOCO1	12:53715875:C:T	3056	-11578	0.210256	2.58317e-06	0.471809	0.0970747	0.00139986	0.00321537	0.000249985	NR1	rs3741659
CANT1	17:79956018:T:G	4210	946253	0.102564	0.000200841	-0.473817	0.124763	0.217078	0.158227	0.000103428	NR1	rs76211449
CAPG	2:85394936:T:C	3268	-15431	0.589744	4.43043e-44	-0.97461	0.0517116	9.999e-05	7.22685e-35	0.000349598	NR1	rs6886
CARHSP1	16:9677418:A:T	6908	808411	0.253846	0.00055845	-0.300082	0.0853629	0.454255	0.25336	0.000124047	NR1	rs60158444
CASP3	4:183656024:T:C	4515	-993424	0.266667	1.41848e-05	-0.295243	0.0661026	0.0171983	0.0219068	0.000136015	NR1	rs6838230
CASP8	2:201781238:C:T	2987	520701	0.189744	0.000303368	-0.346446	0.0939946	0.145185	0.121607	0.000307781	NR1	rs16838147
CBLIF	11:60219914:C:T	2676	374414	0.0589744	0.00611223	-0.593094	0.213709	0.750425	0.337031	0.000424691	NR1	rs79773293
CBLN4	20:56243324:A:T	3700	237804	0.346154	0.000257911	0.338339	0.0907037	0.167683	0.135464	0.00021601	NR1	rs4627642
CC2D1A	19:13593720:A:G	2884	-312482	0.0615385	0.00121639	0.418937	0.127395	0.50325	0.267698	0.000191428	NR1	rs55672760
CCDC80	3:112619577:T:G	4357	-21567	0.910256	0.00290756	0.379598	0.125711	0.718128	0.330213	0.000288842	NR1	rs3846050
CCL11	17:34012786:T:C	4098	-272957	0.528205	0.00130501	-0.213573	0.0653646	0.574643	0.287848	0.000157417	NR1	rs36105864
CCL13	17:34409766:A:C	4090	53285	0.715385	0.000604066	0.251431	0.0719815	0.336766	0.208818	0.000173811	NR1	rs210836
CCL14	17:35983666:A:G	2719	-3064	0.0717949	3.89689e-20	-0.944034	0.0905096	9.999e-05	5.50347e-15	0.000256879	NR1	rs41341749
CCL15	17:36025195:T:G	2722	23641	0.0487179	1.12921e-18	1.58918	0.16037	9.999e-05	1.3756e-13	0.000265019	NR1	rs9911839
CCL16	17:35980421:T:C	2718	-1077	0.0948718	7.94655e-26	-1.46087	0.117664	9.999e-05	6.12606e-20	0.000283165	NR1	rs112689088
CCL17	16:57516873:C:T	4122	112105	0.289744	0.00012674	0.297799	0.075972	0.116888	0.102306	0.000137598	NR1	rs9922214
CCL18	17:36065520:G:A	2733	1247	0.828205	1.16683e-14	-0.70856	0.0839993	9.999e-05	3.66403e-10	0.000270371	NR1	rs712042
CCL19	9:35214480:G:A	3018	523203	0.0461538	0.000323701	0.790655	0.215557	0.10299	0.0928077	0.000553824	NR1	rs117415681
CCL2	17:33474597:G:A	4126	-780689	0.430769	0.00213014	-0.26043	0.0835352	0.736726	0.335133	0.000155162	NR1	rs7342837
CCL20	2:228412113:G:A	4747	598270	0.205128	0.00114951	0.347109	0.105014	0.473753	0.257236	0.000225889	NR1	rs7599055
CCL21	9:35143202:G:A	2983	433065	0.230769	0.00451772	0.311555	0.108309	0.664934	0.314263	0.000555324	NR1	rs74306989
CCL22	16:57072984:C:T	4143	-285800	0.464103	0.00228854	-0.242259	0.0782687	0.810019	0.351317	0.000176658	NR1	rs247591
CCL23	17:35999179:A:C	2719	-18794	0.85641	1.01405e-07	0.672214	0.121024	0.00019998	0.000250324	0.000273201	NR1	rs712048
CCL24	7:75831075:A:G	2101	17268	0.884615	1.06815e-18	-1.25311	0.126345	9.999e-05	2.84291e-13	0.000500764	NR1	.
CCL25	19:8056476:A:G	4203	3715	0.197436	6.21043e-19	0.888357	0.088814	9.999e-05	1.06824e-13	0.000146072	NR1	rs2032887
CCL26	7:75929707:C:T	2012	157495	0.0615385	3.78544e-05	-0.778921	0.184237	0.0142986	0.0209361	0.000538513	NR1	.
CCL27	9:35106990:C:T	3017	444332	0.0512821	0.000353042	-0.669281	0.183666	0.112889	0.0991178	0.000601133	NR1	rs10972316
CCL28	5:43158763:A:G	3144	-253629	0.0769231	0.000362548	-0.71133	0.1956	0.0973903	0.0896641	0.000628076	NR1	rs145857982
CCL3	17:36080352:T:A	2731	-9792	0.276923	2.57141e-09	0.508268	0.0809373	9.999e-05	1.04491e-05	0.000244551	NR1	rs1719217
CCL4	17:36463908:G:A	2737	360080	0.182051	0.000207187	-0.474686	0.125268	0.108889	0.0964199	0.000251355	NR1	.
CCL5	17:36549144:A:C	2684	668783	0.433333	0.00221175	-0.148407	0.0477823	0.585041	0.293599	0.000288026	NR1	rs12601380
CCL7	17:34399944:T:A	4128	129722	0.0615385	0.000921205	0.591941	0.175608	0.468853	0.256033	0.000149873	NR1	rs2028036
CCL8	17:34322718:T:C	4063	3282	0.148718	2.09082e-16	-0.863076	0.0949839	9.999e-05	1.03505e-11	0.000187838	NR1	rs11575057
CCN1	1:84624269:C:T	4331	-956493	0.6	6.86675e-05	-0.328269	0.0804941	0.0530947	0.0589798	0.000249727	NR1	rs12752498
CCN2	6:131981651:C:A	3741	30278	0.3	4.16615e-05	-0.224543	0.0534117	0.0274973	0.0343629	0.000289405	NR1	rs233906
CCN3	8:119463308:A:C	3801	46861	0.151282	4.87116e-05	-0.43825	0.105224	0.0234977	0.0323241	0.000335967	NR1	rs4305931
CCN4	8:133190699:C:A	4864	-341	0.310256	1.0089e-07	0.459544	0.0827202	0.00029997	0.000390672	0.000185559	NR1	rs2013158
CCN5	20:44710434:G:A	3570	-4936	0.0717949	0.00343521	-0.421634	0.142152	0.785421	0.343989	0.00022592	NR1	rs62204573
CCS	11:66883030:G:A	1813	289844	0.197436	0.00861483	-0.168395	0.0633833	0.710129	0.32815	0.00080359	NR1	rs78144798
CD109	6:73784654:C:T	4125	88450	0.384615	3.07543e-28	0.802118	0.0605437	9.999e-05	3.83809e-21	0.000398351	NR1	rs9442963
CD14	5:141604281:T:C	2518	971105	0.0641026	0.000577181	-0.412834	0.117751	0.152885	0.123158	0.000565057	NR1	rs17648271
CD160	1:145845550:G:C	263	126050	0.541026	2.81194e-09	-0.445686	0.0711646	9.999e-05	1.54615e-06	0.00268066	NR1
CD163	12:7433999:T:C	2527	-69779	0.64359	0.000328895	0.221429	0.0604405	0.140986	0.115514	0.000327326	NR1	rs10459096
CD164	6:108958008:G:A	2978	-424460	0.102564	0.000173849	0.509728	0.132869	0.0610939	0.0647554	0.000421809	NR1	rs12209480
CD177	19:43351067:T:A	2922	-2620	0.238462	1.2845e-06	0.59327	0.118288	0.00039996	0.00143938	0.000422591	NR1	rs73039857
CD1C	1:158875254:A:G	4406	585330	0.0410256	0.000610982	0.646616	0.185291	0.293171	0.193842	0.000226596	NR1	rs6667119
CD200	3:111798201:G:A	4341	-534956	0.0692308	0.00737956	0.415425	0.153255	0.944106	0.387538	0.000306449	NR1	rs6438014
CD200R1	3:112921689:G:A	3908	-53415	0.0641026	1.65632e-17	1.55654	0.164038	9.999e-05	1.9221e-12	0.00030604	NR1	rs57891445
CD207	2:70828588:C:G	4168	-7229	0.276923	0.000644715	0.329402	0.0948095	0.312369	0.199061	0.000264037	NR1	.
CD209	19:7720812:T:C	4201	-26723	0.689744	3.91402e-05	0.44029	0.104346	0.0391961	0.0442767	0.000153436	NR1	rs2335524
CD22	19:35321214:C:T	3226	-7974	0.102564	0.00195348	0.339857	0.108081	0.60094	0.297648	0.000263944	NR1	rs73031741
CD244	1:160929691:T:C	3094	66803	0.897436	0.00161782	-0.390405	0.121912	0.530847	0.276314	0.000237555	NR1	rs2774277
CD27	12:6442708:G:C	3422	-2248	0.212821	0.000292551	0.321524	0.086998	0.164484	0.132618	0.000196763	NR1	rs3136549
CD274	9:5451557:C:T	3913	1014	0.715385	1.9253e-09	0.506989	0.0800333	9.999e-05	1.0876e-05	0.000223963	NR1	rs822338
CD276	15:73711192:G:A	2788	26808	0.0461538	5.02182e-18	-1.63145	0.168601	9.999e-05	1.01665e-12	0.000482481	NR1	rs966378
CD28	2:203959560:T:G	2605	252920	0.635897	0.00101867	-0.331139	0.0991077	0.312069	0.199061	0.000378804	NR1	rs10172036
CD2AP	6:47585666:G:A	3947	107876	0.166667	6.2004e-09	0.595241	0.0974069	9.999e-05	2.94614e-05	0.000325305	NR1	rs9296567
CD300C	17:74530959:C:G	3845	-15157	0.120513	7.95271e-17	0.932461	0.100909	9.999e-05	7.69146e-12	0.00015793	NR1	rs1171186
CD300E	17:74593057:T:C	3956	-30682	0.374359	2.5427e-09	-0.40254	0.0640793	9.999e-05	1.57402e-05	0.000147006	NR1	rs12941999
CD300LF	17:74703694:T:C	3787	-9230	0.841026	1.94661e-56	1.30273	0.0551754	9.999e-05	1.79362e-46	0.000176792	NR1	rs10512597
CD300LG	17:43984104:G:A	2685	136927	0.151282	0.000853353	0.33652	0.0991745	0.227577	0.163696	0.00045709	NR1	rs117408699
CD302	2:159817823:G:T	4057	19614	0.0897436	0.000150299	0.471301	0.121627	0.0738926	0.074713	0.00036615	NR1	rs148551775
CD33	19:51215061:T:A	4585	-10020	0.415385	1.03745e-40	1.05803	0.0600428	9.999e-05	2.4971e-32	0.000113659	NR1	rs1697573
CD34	1:208888844:A:G	3259	977718	0.328205	0.00060882	-0.268574	0.0769386	0.293371	0.19365	0.000231352	NR1	rs1933571
CD38	4:15768028:A:T	4077	-10301	0.54359	2.19937e-05	-0.256711	0.0588653	0.019998	0.0255621	0.000186816	NR1	rs4698417
CD4	12:6787380:A:G	3075	-2149	0.323077	0.000322414	-0.329367	0.0897685	0.176782	0.140034	0.000242532	NR1	rs73053728
CD40	20:46119308:T:G	3709	993	0.707692	7.69791e-22	0.705429	0.0639543	9.999e-05	3.52017e-16	0.000251041	NR1	rs4810485
CD46	1:206892306:C:T	3085	-859749	0.397436	0.00154824	0.111508	0.0346754	0.528047	0.275293	0.000242611	NR1	rs12116982
CD48	1:160684968:C:G	3032	-26855	0.123077	1.18672e-13	-0.783986	0.0973811	9.999e-05	1.63539e-09	0.000249238	NR1	rs2295615
CD5	11:61067850:A:G	2922	-34640	0.379487	0.000749682	-0.224429	0.0654147	0.280572	0.185616	0.000344057	NR1	rs175129
CD55	1:207238567:T:C	2973	-83112	0.341026	2.19974e-13	-0.3199	0.0402539	9.999e-05	4.70067e-09	0.000284058	NR1	rs11580394
CD58	1:116698975:C:A	3109	127948	0.0410256	0.00892811	-0.43823	0.165732	0.931207	0.383604	0.000353613	NR1	rs12728826
CD59	11:34524306:C:G	3523	787882	0.189744	0.000161959	-0.241648	0.0626816	0.0810919	0.0783836	0.000234107	NR1	rs12225198
CD6	11:61008737:C:T	2971	37056	0.392308	1.26577e-32	-0.920242	0.0623204	9.999e-05	5.01052e-25	0.000308764	NR1	rs11230563
CD63	12:55599055:C:T	2615	-129955	0.123077	0.0053422	0.300073	0.106382	0.655334	0.312327	0.000483903	NR1	rs11523594
CD69	12:9219433:C:T	4327	-541469	0.438462	0.00241171	-0.277171	0.090026	0.686531	0.321323	0.000291335	NR1	rs7137443
CD70	19:6589097:T:G	3867	-2054	0.353846	8.36892e-15	0.677243	0.0797711	9.999e-05	4.1016e-10	0.000180827	NR1	rs7247830
CD74	5:151278699:C:T	4059	865788	0.346154	0.00214883	-0.197184	0.0633037	0.719928	0.330057	0.00020226	NR1	rs17802052
CD79B	17:63919116:C:A	1607	-13216	0.458974	0.000907737	-0.243772	0.0722258	0.127587	0.110855	0.000760158	NR1	rs2005171
CD83	6:14109329:G:A	3646	-8444	0.261538	5.92133e-05	0.356655	0.0866557	0.0367963	0.0442767	0.000258973	NR1	rs62386711
CD84	1:160107703:A:G	3150	-471794	0.415385	0.00026853	-0.317907	0.085478	0.146385	0.121892	0.000217463	NR1	rs11265325
CD8A	2:86789383:A:G	1833	-1531	0.146154	2.40319e-08	0.676884	0.115801	9.999e-05	4.22859e-05	0.000979246	NR1	.
CD93	20:23453723:C:T	4458	367398	0.0846154	0.00181231	-0.240691	0.0759852	0.540546	0.277713	0.000302534	NR1	rs11698511
CDCP1	3:45519363:C:T	3709	372984	0.44359	0.000981487	0.216211	0.0644987	0.321368	0.203498	0.000395855	NR1	rs11717056
CDH1	16:69682629:T:G	2675	945336	0.269231	0.000245024	-0.221508	0.0591622	0.0663934	0.0695538	0.000614242	NR1	rs9934264
CDH15	16:89260185:G:A	4464	88436	0.0692308	0.00100073	0.495731	0.148137	0.552745	0.280785	0.000164014	NR1	.
CDH17	8:93341957:C:T	3901	-866599	0.420513	5.28758e-05	0.368463	0.0889078	0.029897	0.0384402	0.000292376	NR1	rs277777
CDH2	18:28642160:A:G	3251	465029	0.269231	0.000442808	0.308811	0.0862384	0.158884	0.127365	0.000425658	NR1	rs16945076
CDH3	16:69475603:A:G	2599	830292	0.728205	0.00816168	-0.188528	0.0704599	0.771523	0.343023	0.000595765	NR1	rs11641710
CDH5	16:66096083:A:G	2868	-270609	0.330769	9.30092e-05	0.312076	0.0780119	0.0538946	0.0569098	0.000308264	NR1	rs9926029
CDH6	5:30830490:G:A	3975	-363197	0.582051	1.25456e-10	0.59892	0.0875545	9.999e-05	1.20108e-06	0.000163819	NR1	rs35733856
CDHR1	10:84170566:C:A	5061	-23972	0.133333	0.000862746	-0.518688	0.153005	0.357164	0.214627	0.000281268	NR1	rs76395746
CDHR2	5:177422097:T:C	2293	872754	0.238462	0.00108533	-0.251046	0.0755608	0.358764	0.214627	0.00032687	NR1	rs7711038
CDHR5	11:620599:G:T	3641	-4357	0.682051	5.02835e-09	0.563682	0.0916357	9.999e-05	2.96356e-05	0.000231942	NR1	rs7932167
CDKN2D	19:9908181:G:A	3485	-660799	0.187179	0.000878004	0.484293	0.143075	0.353065	0.213611	0.000244049	NR1	rs73018063
CDNF	10:14878103:T:G	5020	40065	0.253846	7.60785e-06	0.454404	0.0985	0.0089991	0.0138624	0.000172389	NR1	rs12259906
CDON	11:125094861:C:G	4970	-968006	0.476923	0.000329434	0.239722	0.0654419	0.256374	0.178703	0.000151254	NR1	rs1048592
CDSN	6:31118600:C:G	9614	-1847	0.461538	5.02135e-10	0.560042	0.0850303	9.999e-05	1.42079e-05	0.000325226	NR1	.
CEACAM1	19:42555447:T:C	2131	26965	0.15641	4.02435e-08	-0.563946	0.0982118	9.999e-05	4.78652e-05	0.00064372	NR1	rs1076243
CEACAM21	19:41581783:G:A	2529	5616	0.746154	2.53372e-38	-1.24947	0.074519	9.999e-05	1.03148e-30	0.000318063	NR1	rs4578777
CEACAM5	19:41044135:C:A	2408	-664492	0.0641026	4.17349e-05	0.831448	0.197796	0.0165983	0.0218603	0.000414953	NR1	rs113335154
CEACAM8	19:41761958:C:G	2201	-832967	0.330769	0.00177957	0.29902	0.0942329	0.279972	0.186947	0.000652498	NR1
CELA3A	1:21934846:C:G	3918	-66812	0.682051	0.0023855	0.313591	0.101742	0.747325	0.337072	0.00019488	NR1	rs6672273
CES1	16:55810160:C:T	4062	-22937	0.074359	1.76909e-26	-1.20758	0.0955284	9.999e-05	3.6884e-20	0.000198157	NR1	.
CES2	16:66210458:G:A	2046	-725059	0.648718	0.00144206	0.290114	0.0896159	0.29957	0.194129	0.000563377	NR1	rs235143
CES3	16:66638154:T:C	1998	-323113	0.0794872	0.00236185	-0.497743	0.161325	0.424558	0.24	0.00053263	NR1	rs48573
CFC1	2:130794429:C:T	2258	194853	0.253846	0.0018454	0.358513	0.113381	0.331367	0.205514	0.000555294	NR1	rs272122
CGA	6:86246530:C:T	4161	-848577	0.279487	0.000366845	-0.326508	0.0898633	0.128587	0.110242	0.000421484	NR1	rs9344588
CGREF1	2:27086791:A:C	2367	-32338	0.574359	3.58415e-08	-0.496558	0.0861273	9.999e-05	9.11739e-05	0.000579765	NR1	rs6742004
CHAC2	2:53676371:T:C	4776	-91434	0.0692308	0.000139282	-0.76606	0.196675	0.09959	0.0924044	0.000287145	NR1	rs77637897
CHGB	20:5917131:A:C	4383	5620	0.397436	8.48529e-18	-0.622909	0.0649262	9.999e-05	7.99415e-13	0.000163079	NR1	rs446658
CHI3L1	1:203189101:T:C	3101	2396	0.853846	7.76138e-10	0.632441	0.0972171	9.999e-05	4.06164e-06	0.000238252	NR1	rs946262
CHIT1	1:203218965:G:A	3085	-10709	0.217949	3.46402e-28	-1.06839	0.0807506	9.999e-05	1.50816e-22	0.00022189	NR1	rs2244783
CHL1	3:66232:T:A	2448	-130532	0.364103	5.80843e-07	-0.334613	0.0644983	0.00069993	0.00118728	0.000386194	NR1	rs1015457
CHRDL2	11:74683064:T:C	3296	-48363	0.312821	0.00242269	-0.319496	0.103822	0.576642	0.28797	0.00036127	NR1	rs11236212
CIAPIN1	16:57263552:C:T	4130	-183834	0.912821	0.00380481	-0.233032	0.0794539	0.926407	0.382928	0.00013975	NR1	rs8046668
CKAP4	12:106195057:C:T	3799	-52964	0.5	0.00165811	-0.195805	0.0612876	0.568243	0.286454	0.000237988	NR1	rs4145167
CKMT1A_CKMT1B	15:42855686:A:T	1470	-738342	0.24359	0.00615349	-0.331727	0.119629	0.393761	0.227517	0.00131805	NR1	rs7173782
CLC	19:38903841:C:T	3582	-834189	0.0589744	0.00295618	-0.639215	0.21206	0.731027	0.334774	0.000246558	NR1	rs17886254
CLEC10A	17:7100810:A:C	3786	20558	0.169231	9.40872e-08	0.579677	0.104076	0.00039996	0.000331892	0.000142113	NR1	rs35249797
CLEC11A	19:50711843:A:G	3945	-11522	0.0615385	2.43939e-08	1.00977	0.172839	0.00029997	0.000107323	0.000116669	NR1	.
CLEC14A	14:39005989:C:T	3584	749895	0.305128	0.00128207	0.234724	0.071721	0.349065	0.211079	0.000446556	NR1	rs17108728
CLEC1A	12:10102413:G:A	4506	3427	0.730769	0.00127861	-0.289436	0.0884167	0.466253	0.257236	0.000300623	NR1	rs3912643
CLEC1B	12:9995251:T:C	4461	-3871	0.338462	4.30923e-07	0.3301	0.0628546	0.00029997	0.00085676	0.000302512	NR1	rs521040
CLEC4A	12:7688362:G:T	2683	-435256	0.410256	0.0169683	0.252897	0.104923	0.990001	0.397714	0.000305238	NR1	rs55704972
CLEC4C	12:7747588:C:T	2559	212	0.407692	5.83564e-12	0.68763	0.0931032	9.999e-05	4.52654e-08	0.000307582	NR1	rs10845821
CLEC4D	12:8535216:A:G	2852	21712	0.576923	3.28309e-13	0.6115	0.0776066	9.999e-05	4.09629e-09	0.000304405	NR1	rs10841847
CLEC4G	19:7108964:G:A	4200	-623147	0.597436	0.000956586	-0.323166	0.0961879	0.530947	0.275472	0.000139379	NR1	rs2914552
CLEC5A	7:141884384:A:G	2556	-62591	0.338462	2.81132e-05	0.393856	0.0915699	0.010399	0.0154377	0.000352606	NR1	.
CLEC6A	12:8475328:A:C	2867	19365	0.789744	0.00179813	0.33269	0.104949	0.483052	0.261755	0.000293865	NR1	rs11045619
CLEC7A	12:10118488:A:C	4614	-11712	0.0717949	1.61218e-30	-1.50882	0.107493	9.999e-05	2.11398e-23	0.000291924	NR1	rs16910526
CLMP	11:123192617:A:G	4179	-2632	0.530769	4.87229e-05	0.224575	0.0539212	0.040296	0.0453521	0.000191855	NR1	rs7129640
CLPP	19:6912883:G:A	3756	551351	0.738462	0.00323225	0.354889	0.118862	0.872513	0.367326	0.000148389	NR1	rs10421295
CLPS	6:35852767:C:G	3145	55443	0.692308	3.71339e-07	0.52361	0.0991038	0.00029997	0.000801907	0.000341105	NR1	.
CLSTN1	1:9916288:C:T	2717	92322	0.864103	0.00207545	0.50269	0.160825	0.647635	0.310079	0.000227365	NR1	rs1975402
CLSTN2	3:139916951:G:A	3704	-18235	0.074359	1.32819e-05	0.82316	0.183655	0.010499	0.0146281	0.000295305	NR1	rs7355825
CLUL1	18:589353:G:C	3445	-7636	0.317949	1.65891e-07	0.525432	0.0963624	0.00049995	0.000462228	0.000203012	NR1	rs12955797
CNDP1	18:74542844:T:C	4195	8343	0.269231	0.000110649	0.283535	0.0716843	0.0922908	0.0846981	0.000142577	NR1	rs17817095
CNPY4	7:100217485:C:T	2421	97850	0.138462	1.00717e-07	-0.739606	0.133124	0.00019998	0.000202791	0.000613077	NR1	rs73161728
CNST	1:247412334:G:T	5016	845877	0.164103	0.000589977	-0.447441	0.12785	0.375162	0.221431	0.00017098	NR1	rs7528887
CNTN1	12:40666283:A:C	5001	-26157	0.14359	1.85666e-05	-0.432729	0.0983044	0.0121988	0.0180366	0.00035225	NR1	rs4548696
CNTN2	1:205054884:C:T	3577	11671	0.848718	3.39683e-22	-1.03416	0.0927118	9.999e-05	1.45705e-16	0.000203955	NR1	rs1572995
CNTN3	3:74564738:G:C	3136	-49922	0.112821	0.000900459	0.372687	0.110344	0.284072	0.189265	0.000323825	NR1	rs77004389
CNTN4	3:2952437:C:G	6211	853570	0.0794872	2.39068e-05	-0.602979	0.138912	0.039996	0.0454753	9.577e-05	NR1	rs6442771
CNTN5	11:99184351:G:T	6218	163401	0.697436	1.66437e-05	-0.432917	0.0977636	0.0172983	0.0245067	0.000227685	NR1	rs10892860
CNTNAP2	7:145495027:C:T	4202	-621775	0.269231	6.58998e-08	0.517008	0.0916287	9.999e-05	0.000171008	0.000349784	NR1	rs10441203
COL18A1	21:46056826:C:T	4870	651660	0.117949	0.000496362	-0.449055	0.126538	0.325967	0.205006	0.000188316	NR1	.
COL1A1	17:49215967:T:C	3050	-985665	0.351282	0.00209249	0.309616	0.0991357	0.731127	0.334224	0.00017917	NR1	rs9896800
COL4A1	13:110369451:A:T	4854	62293	0.1	0.000104565	-0.499734	0.125876	0.108789	0.0964635	0.000127944	NR1	rs72655777
COL6A3	2:237351638:G:C	4269	-62527	0.553846	0.000142777	-0.223425	0.0574575	0.0892911	0.0857296	0.000226963	NR1	rs3790996
COL9A1	6:70469082:G:A	3855	165997	0.417949	4.27592e-06	-0.411341	0.0866687	0.00189981	0.00471555	0.000397705	NR1	rs35516318
COLEC12	18:449445:G:A	3177	-51257	0.115385	0.000236161	-0.304214	0.0810358	0.145585	0.11836	0.000214083	NR1	rs72865608
COMP	19:19148869:A:G	3140	357563	0.166667	0.00300102	0.223641	0.0743115	0.708029	0.32815	0.000282564	NR1	rs79218662
COMT	22:19962712:C:T	3849	20939	0.505128	8.65369e-21	-0.60188	0.056456	9.999e-05	2.21197e-15	0.000257785	NR1	rs4633
CORO1A	16:29870161:A:G	1379	-313442	0.266667	0.000330122	-0.374893	0.102358	0.0615938	0.0662956	0.000818877	NR1	rs60447887
COX5B	2:97757934:C:T	2022	111871	0.482051	0.00907483	0.27089	0.10267	0.70453	0.326134	0.000889113	NR1	.
CPA1	7:130405842:G:A	3657	25347	0.541026	0.00133116	0.31127	0.0954393	0.530947	0.275625	0.000209762	NR1	.
CPA2	7:130203031:G:C	3583	-63833	0.235897	6.8202e-05	0.444374	0.108918	0.0513949	0.0539851	0.000234754	NR1	rs112690409
CPB1	3:148927239:C:T	3706	99427	0.0769231	0.000889406	-0.609362	0.180225	0.383362	0.225358	0.000206368	NR1	rs12491660
CPE	4:165163956:A:G	4787	-215053	0.182051	0.0016922	0.39503	0.123887	0.612739	0.301354	0.000192851	NR1	rs28408505
CPM	12:69925422:T:G	4228	992250	0.253846	0.000505581	-0.316249	0.0892457	0.310369	0.198713	0.000199444	NR1	rs11177971
CPPED1	16:12788237:C:A	5592	-15651	0.115385	2.00255e-27	1.06336	0.0820006	9.999e-05	6.51157e-21	0.000187489	NR1	rs12923226
CPVL	7:29120988:C:T	4491	-25550	0.228205	1.16705e-13	-0.794939	0.0987073	9.999e-05	4.10768e-09	0.000151707	NR1	rs34219043
CPXM1	20:2810695:A:T	3837	10067	0.0897436	3.24857e-14	-0.747361	0.090409	9.999e-05	1.1235e-09	0.000180902	NR1	rs11087557
CR2	1:207503259:C:T	3118	48930	0.771795	0.000483474	-0.28211	0.0793293	0.234477	0.168898	0.000289009	NR1	rs4310446
CRADD	12:93837506:G:C	3960	160130	0.207692	0.000104218	-0.292655	0.0736998	0.0824918	0.0828302	0.000213659	NR1	rs60169972
CREG1	1:167640237:G:A	3783	86474	0.348718	0.00517894	-0.246611	0.0871075	0.921108	0.381492	0.000231795	NR1	rs12402030
CRELD2	22:49928601:G:C	5501	9966	0.107692	0.000134393	0.496522	0.127168	0.152785	0.125598	0.00011865	NR1	rs9616399
CRH	8:65238866:C:T	2471	-939599	0.151282	0.0174053	0.324954	0.135357	0.941906	0.387363	0.000586389	NR1	rs28419148
CRHBP	5:76911950:A:T	4100	-41096	0.587179	2.31725e-12	-0.53739	0.0712169	9.999e-05	6.10158e-08	0.000183214	NR1	rs6879129
CRIM1	2:35884613:A:C	5267	-471166	0.44359	0.000801199	0.233073	0.0683179	0.432857	0.242863	0.000253346	NR1	rs1554364
CRIP2	14:104714448:C:T	1843	-760374	0.115385	0.000623834	-0.423165	0.121467	0.145485	0.119969	0.000523195	NR1	rs34251364
CRISP2	6:49742392:G:A	3430	28848	0.446154	2.98089e-11	0.554057	0.0780517	9.999e-05	2.95426e-07	0.000601989	NR1	rs555247
CRKL	22:21708191:C:T	2791	790783	0.0641026	0.00656902	-0.266349	0.0968302	0.892811	0.374488	0.0002647	NR1	rs76940365
CRLF1	19:18273520:T:C	3224	-333280	0.389744	0.00211165	0.31132	0.0997718	0.617038	0.30236	0.000230271	NR1	rs10854164
CRNN	1:152419091:G:A	3285	4827	0.153846	1.68224e-14	-0.980825	0.117112	9.999e-05	4.82126e-10	0.000474328	NR1	rs10494275
CRTAC1	10:98584379:T:C	3345	553757	0.176923	0.00263778	-0.352452	0.115538	0.632837	0.307583	0.000292748	NR1	rs11189692
CRTAM	11:122868010:T:C	3831	29509	0.115385	3.36124e-06	-0.675526	0.140709	0.00279972	0.00573318	0.000181665	NR1	rs17126930
CSF1	1:109961738:C:T	3417	50888	0.610256	0.000232192	-0.27682	0.0736486	0.145385	0.119878	0.000245069	NR1	rs11102041
CSF3	17:40844984:C:T	2806	829543	0.225641	0.000176389	-0.433513	0.113116	0.0686931	0.0705009	0.000448966	NR1	rs28475296
CST3	20:23641913:G:A	4478	3957	0.84359	2.78137e-07	0.278402	0.0520909	0.00029997	0.000633992	0.000300485	NR1	rs2424582
CST5	20:23879541:A:G	4589	-208	0.384615	8.87381e-16	0.737477	0.0832884	9.999e-05	8.66645e-11	0.000264636	NR1	rs1799841
CST6	11:65528811:G:C	2057	-483198	0.0923077	0.00903884	-0.356832	0.13517	0.792521	0.345819	0.000663721	NR1	rs77461879
CST7	20:24991697:C:T	3877	42427	0.194872	6.85027e-12	-0.682704	0.0927875	9.999e-05	7.77592e-08	0.000528341	NR1	rs7268095
CSTB	21:43781951:G:A	4460	5642	0.371795	8.44367e-12	-0.4507	0.0615614	9.999e-05	1.57661e-07	0.00016853	NR1	rs35285321
CTRB1	16:75221615:C:T	3844	2626	0.0615385	1.88839e-08	1.11561	0.18931	9.999e-05	6.60122e-05	0.000333442	NR1	rs139223088
CTRC	1:15443606:C:A	4506	5162	0.205128	3.43882e-05	0.492282	0.115788	0.029997	0.0382397	0.000185742	NR1	rs10803384
CTSB	8:11852792:A:G	3790	-15296	0.679487	2.19271e-07	0.442821	0.0820878	0.00049995	0.000714538	0.000290453	NR1	.
CTSC	11:88390564:T:A	4164	52827	0.305128	3.47424e-13	0.764567	0.0971507	9.999e-05	1.05218e-08	0.00034879	NR1	rs61901734
CTSD	11:1694102:T:C	4680	-69826	0.361538	0.000194139	0.219013	0.0575314	0.173983	0.138123	0.000164149	NR1	rs7130416
CTSF	11:65890533:C:T	1774	-678074	0.0589744	0.00453804	-0.564247	0.196256	0.524548	0.273739	0.000845936	NR1	rs146161054
CTSH	15:78949929:A:G	4513	4882	0.807692	8.35088e-23	-1.07123	0.0942381	9.999e-05	6.53721e-17	0.000186435	NR1	rs4779153
CTSL	9:87460282:T:C	3645	-265838	0.689744	0.00365944	0.297627	0.101041	0.809819	0.350365	0.000228703	NR1	rs6559992
CTSO	4:155959861:C:T	4587	5994	0.233333	0.000748032	-0.34251	0.0998132	0.366963	0.216711	0.000225768	NR1	.
CTSS	1:150753762:C:T	2013	-12017	0.35641	4.25254e-06	-0.389051	0.0819506	0.00069993	0.00241566	0.00074125	NR1	rs7526489
CTSV	9:96072371:T:C	2853	-966772	0.417949	0.00393512	0.243389	0.0832974	0.684232	0.320543	0.000414634	NR1	rs10819792
CTSZ	20:58418601:C:T	3179	-588654	0.0589744	0.0019461	0.337808	0.107389	0.739926	0.336177	0.000150789	NR1	rs62205705
CX3CL1	16:57386934:A:G	4135	14443	0.776923	0.000140076	-0.392147	0.100717	0.125087	0.109071	0.000141042	NR1	rs675841
CXADR	21:17462928:A:G	3870	-50116	0.317949	7.9592e-06	-0.433488	0.094181	0.00549945	0.00970283	0.00021857	NR1	rs56358256
CXCL1	4:73868951:T:C	2849	-443	0.330769	1.24506e-11	0.54981	0.0758045	9.999e-05	8.57596e-08	0.000476881	NR1	rs3117604
CXCL10	4:75071967:G:A	4934	-951531	0.0794872	0.0010012	0.484764	0.144865	0.393361	0.22548	0.000327804	NR1	rs72862239
CXCL11	4:76303236:T:A	4923	267165	0.212821	0.000863188	-0.317825	0.0937575	0.357764	0.214712	0.000281484	NR1	rs2174920
CXCL12	10:44283379:T:A	4748	-101719	0.0615385	2.92277e-05	0.896525	0.208901	0.0154985	0.025636	0.000373545	NR1	rs111537293
CXCL13	4:77582116:G:T	4469	-23705	0.2	0.00421389	-0.329777	0.113736	0.765123	0.341059	0.000295604	NR1	rs355683
CXCL16	17:4726230:G:A	4271	-13699	0.123077	5.41274e-05	0.466076	0.112621	0.0362964	0.0439772	0.000236597	NR1	rs9894403
CXCL17	19:42551275:G:A	2049	108328	0.246154	0.00291232	0.165314	0.0547564	0.378362	0.219982	0.000692892	NR1	rs60662795
CXCL3	4:73620151:C:T	2670	-418539	0.269231	0.00361952	0.185151	0.0627811	0.539846	0.277488	0.000459897	NR1	rs1247593
CXCL5	4:74008485:T:C	2648	9807	0.861538	1.33245e-08	-0.484154	0.0812099	9.999e-05	2.58298e-05	0.0005272	NR1	rs2115693
CXCL6	4:73772199:C:T	2840	-64480	0.364103	4.04171e-14	0.530158	0.064416	9.999e-05	5.32088e-10	0.000517644	NR1	rs6831029
CXCL8	4:74703835:T:C	2946	963265	0.420513	0.00714057	0.194483	0.0714474	0.742326	0.336756	0.000551605	NR1	.
CXCL9	4:76625272:C:T	4938	617762	0.166667	0.000848997	0.393706	0.115977	0.356164	0.214017	0.000291082	NR1	rs10049806
DAG1	3:48828880:C:G	1662	-641388	0.0692308	0.00496372	0.393613	0.138339	0.39976	0.227517	0.00126492	NR1	rs144519232
DARS1	2:136042039:C:T	3088	56412	0.235897	8.97762e-05	0.392075	0.0977866	0.0340966	0.0419395	0.000510466	NR1	rs10928554
DBI	2:119360661:A:G	3124	-6317	0.123077	0.00109209	-0.282296	0.0850137	0.371563	0.219275	0.000355326	NR1	rs12612942
DBNL	7:44934601:T:G	3483	889898	0.335897	0.00181518	0.24216	0.0764607	0.528447	0.275293	0.000328668	NR1	rs11773109
DCBLD2	3:98790743:G:A	4321	-110953	0.374359	6.2516e-06	0.327124	0.0702159	0.00319968	0.00561025	0.000363571	NR1	rs278390
DCN	12:90288557:C:T	3267	-894261	0.0717949	0.00199936	0.431926	0.137675	0.49505	0.26531	0.000368981	NR1	rs2579116
DCTN1	2:74980411:A:G	2799	600099	0.774359	0.00574215	0.243923	0.0872276	0.80452	0.350365	0.000357319	NR1	rs4853090
DCTPP1	16:31364296:G:A	1312	934265	0.346154	0.00391156	0.261562	0.0894568	0.40386	0.230974	0.000908454	NR1	rs12930660
DCXR	17:81342952:T:G	4070	-694746	0.0641026	0.000590236	-0.440038	0.125739	0.30327	0.195276	0.00023596	NR1	rs7215540
DDAH1	1:85049158:T:G	4367	-416002	0.661538	0.00153322	-0.254962	0.0792123	0.561344	0.283142	0.000298332	NR1	rs3754270
DDC	7:50545208:G:A	4124	-20198	0.533333	5.75996e-05	0.31159	0.0755781	0.0361964	0.0421798	0.000314147	NR1	rs7786398
DDR1	6:30898565:C:G	11400	14045	0.166667	8.48702e-09	0.500958	0.0828035	9.999e-05	0.000135115	0.000331786	NR1	.
DDX58	9:33457655:C:T	4908	931458	0.0974359	0.00181886	0.535463	0.169103	0.564144	0.283748	0.000296469	NR1	rs505698
DECR1	8:90821203:C:T	2664	819725	0.0512821	0.00407732	-0.573782	0.197155	0.489451	0.263123	0.000720385	NR1	rs77260603
DEFA1_DEFA1B	8:6971259:T:C	4425	-27940	0.0769231	4.37349e-05	0.404243	0.0964345	0.0431957	0.049352	0.000204689	NR1	rs12682063
DEFB4A_DEFB4B	8:8384155:G:A	2648	967291	0.335897	0.00128434	-0.32264	0.0986004	0.463254	0.254978	0.000271938	NR1	rs4840341
DFFA	1:10553294:T:C	2112	80764	0.246154	0.00828621	-0.227448	0.0851742	0.877512	0.370066	0.000335075	NR1	rs12725704
DKK1	10:52652733:A:C	4700	338451	0.682051	0.000148956	0.20919	0.0539521	0.0976902	0.091149	0.000213806	NR1	rs1159798
DKK3	11:12060942:A:T	4991	52315	0.179487	0.00032471	0.345295	0.09416	0.329667	0.205006	0.00010975	NR1	rs1564944
DKK4	8:42764858:C:G	2609	387628	0.164103	0.00956644	0.294402	0.112376	0.841316	0.358328	0.000580692	NR1	rs1072003
DKKL1	19:49357995:G:A	3139	-5883	0.389744	6.96937e-56	-1.18791	0.050795	9.999e-05	7.08001e-46	0.000221088	NR1	.
DLK1	14:100706787:A:C	3193	-20106	0.210256	3.3108e-09	-0.593286	0.0952067	9.999e-05	1.38599e-05	0.000159136	NR1	rs17099623
DLL1	6:170103939:T:C	2971	-187140	0.928205	0.00017089	0.431945	0.112459	0.0840916	0.079228	0.000418717	NR1	rs4710876
DNAJA2	16:47729931:G:A	948	756256	0.0846154	0.00906305	-0.262352	0.0994164	0.419358	0.239914	0.00154284	NR1	rs12927080
DNAJB1	19:14532456:T:C	3374	14058	0.415385	0.000317309	-0.247685	0.0674255	0.191581	0.149605	0.000199848	NR1	rs7253780
DNER	2:229680267:T:C	4660	-34289	0.805128	2.63725e-07	-0.525685	0.0981535	0.00019998	0.000696165	0.000189933	NR1	rs2216248
DNMBP	10:100668545:C:T	3292	658597	0.551282	0.000245374	-0.270826	0.0723419	0.0939906	0.0874562	0.000393473	NR1	rs2489009
DNPH1	6:43249671:G:T	2710	20189	0.0641026	6.43364e-13	-0.777447	0.100117	9.999e-05	5.78592e-09	0.000240452	NR1	rs113461790
DPEP1	16:89641595:T:A	3456	27952	0.612821	1.81643e-22	0.807432	0.0717747	9.999e-05	4.48859e-16	0.000270505	NR1	rs154656
DPEP2	16:67713403:C:A	2056	-286082	0.379487	0.00168839	-0.33498	0.105032	0.223378	0.16276	0.000936833	NR1	rs62059344
DPP10	2:115408279:G:A	2804	965637	0.0692308	0.00679224	0.468885	0.171174	0.840616	0.358328	0.000360866	NR1	rs111788828
DPP4	2:162062011:A:G	2238	-12205	0.35641	5.82004e-05	-0.210608	0.0511168	0.0122988	0.0188494	0.000584896	NR1	rs2892816
DPP6	7:154903777:G:C	4503	851378	0.105128	0.00011034	0.479527	0.121213	0.0961904	0.0880025	0.000129586	NR1	rs76707032
DPP7	9:136925596:G:A	2663	-189138	0.171795	0.000425836	-0.417031	0.116105	0.19848	0.152031	0.000296935	NR1	rs17250673
DPT	1:168727311:G:C	4543	-1896	0.697436	5.45043e-09	0.437379	0.0712832	9.999e-05	2.85817e-05	0.000211158	NR1	rs567067
DPY30	2:32921417:G:C	3153	881611	0.35641	0.00434706	0.200199	0.0692907	0.779922	0.343989	0.000353354	NR1	rs6736448
DRAXIN	1:11692083:G:A	2971	372	0.0666667	4.92748e-08	-0.852841	0.149586	0.00029997	0.000132601	0.000227625	NR1	rs6679089
DSC2	18:31715869:G:A	4365	613447	0.85641	0.000634186	-0.261159	0.0750657	0.30207	0.195276	0.00024081	NR1	rs1972988
DSG2	18:31496464:C:T	3936	-1714	0.382051	0.000205975	-0.240278	0.0633818	0.121688	0.105066	0.000254284	NR1	rs9961910
DSG3	18:31478871:A:G	3947	31129	0.182051	0.000976491	-0.32976	0.0983278	0.414159	0.236645	0.000225932	NR1	rs2035037
DSG4	18:31743587:C:G	3992	366809	0.876923	0.00386633	0.374148	0.127796	0.833817	0.357974	0.00023081	NR1	rs1842781
DTX3	12:58137141:A:G	2899	532316	0.412821	0.00243052	-0.201815	0.0656023	0.460354	0.255282	0.000478281	NR1	rs11172473
EBAG9	8:110172399:A:C	2834	632225	0.151282	0.00994469	0.331584	0.127237	0.846815	0.360629	0.000518772	NR1	rs59790465
EBI3_IL27	19:4247479:C:T	3627	17955	0.333333	6.18229e-06	-0.389121	0.0834773	0.00729927	0.010488	0.000175054	NR1	rs8109160
ECE1	1:20408608:C:T	3975	-881856	0.820513	7.98049e-05	0.483989	0.119806	0.060494	0.0656898	0.000261324	NR1	rs12743242
EDAR	2:108834801:A:G	3007	-154420	0.0923077	0.00103816	0.468408	0.140427	0.276772	0.186947	0.000384277	NR1	rs1117425
EDIL3	5:83567517:G:C	4059	-817364	0.130769	0.00409532	-0.334134	0.114867	0.80312	0.349511	0.000277687	NR1	rs34953090
EFEMP1	2:55864736:C:T	4247	-59047	0.405128	0.000494239	0.144995	0.0408438	0.245075	0.175012	0.000319312	NR1	rs1346790
EFNA1	1:155133578:A:G	2242	5701	0.648718	1.568e-06	0.360611	0.0725354	0.00129987	0.00170535	0.000429231	NR1	rs4390169
EFNA4	1:154649758:T:C	2234	-413983	0.223077	0.00189359	-0.222076	0.0704091	0.433657	0.243445	0.000422792	NR1	rs7523890
EGF	4:109070183:A:G	3475	-842701	0.676923	0.000210811	0.250161	0.0660976	0.109089	0.0971073	0.000302328	NR1	rs13104115
EGFL7	9:137555130:A:C	2816	892213	0.197436	0.000415908	-0.390309	0.108466	0.213579	0.158227	0.000211685	NR1	rs10110
EGFR	7:54786073:G:A	4746	-232945	0.107692	0.0023225	-0.340339	0.11012	0.655534	0.311408	0.000307997	NR1	rs2709313
EGLN1	1:232192216:G:A	4229	769928	0.541026	0.000896632	0.264094	0.0781635	0.492651	0.263123	0.000220595	NR1	rs7520991
EIF4B	12:53020988:G:T	4206	14531	0.933333	0.00340218	0.288376	0.0971223	0.813519	0.351317	0.000239004	NR1	rs1546697
EIF4EBP1	8:38390744:G:A	2525	360209	0.133333	0.00827827	-0.196923	0.0737337	0.926607	0.382928	0.00031938	NR1	rs112035500
EIF4G1	3:184945870:A:C	3967	631263	0.684615	0.0001012	0.221001	0.0555484	0.0757924	0.074764	0.000209621	NR1	rs9870352
ELOA	1:24124443:G:A	3125	380971	0.205128	0.000952544	0.332988	0.0990744	0.328267	0.204268	0.000307662	NR1	rs7355010
ENAH	1:225400831:T:G	3818	-252293	0.682051	0.00137556	0.31665	0.0973842	0.463154	0.254752	0.000344079	NR1	rs10915823
ENG	9:127838998:C:T	2170	-15661	0.384615	0.000245948	0.282834	0.0755621	0.0680932	0.0705009	0.000607796	NR1	rs11794565
ENO1	1:8107120:C:A	3112	-771567	0.074359	0.00292134	0.429048	0.142158	0.755124	0.338849	0.000230709	NR1	rs115822521
ENO2	12:6726319:A:G	3108	-188262	0.828205	0.00347429	-0.320474	0.10818	0.776322	0.343023	0.000231084	NR1	rs2103397
ENPP2	8:119711052:A:G	3849	72212	0.379487	3.07988e-07	-0.369782	0.0694681	0.00039996	0.000560493	0.000398332	NR1	rs7005200
ENPP5	6:46115200:C:T	3510	-55781	0.733333	7.51693e-19	-0.834628	0.0836906	9.999e-05	7.22357e-14	0.000311068	NR1	rs995563
ENPP7	17:79732746:T:C	4451	1802	0.384615	1.76831e-26	0.93218	0.0737422	9.999e-05	1.08704e-20	0.00014223	NR1	rs11871061
ENTPD2	9:136104687:G:C	2721	-949375	0.833333	0.000394922	-0.485582	0.134403	0.179582	0.142129	0.000235353	NR1	rs1164894
ENTPD5	14:74007693:T:C	3470	-11596	0.0666667	9.30805e-09	-1.07149	0.177636	9.999e-05	3.36732e-05	0.000476753	NR1	rs117818304
ENTPD6	20:25095963:C:A	3571	-99750	0.115385	0.00069096	0.471748	0.136563	0.179782	0.144562	0.000563204	NR1	rs78757402
EPCAM	2:47573092:C:T	4177	203780	0.0589744	8.31095e-05	-0.767114	0.190381	0.0714929	0.0722799	0.000204438	NR1	rs34309501
EPHA1	7:143390339:G:A	2230	-18518	0.217949	0.0151743	0.219987	0.08971	0.89591	0.374718	0.000601486	NR1	rs34824368
EPHA2	1:16938395:T:G	3462	782325	0.0564103	0.00408138	0.406518	0.139697	0.733127	0.334919	0.000348745	NR1	rs72644310
EPHB4	7:100989509:C:T	3614	161985	0.869231	0.000461829	-0.281531	0.0788805	0.221278	0.16276	0.000308416	NR1	rs4556017
EPHB6	7:142854785:A:G	2308	-292	0.274359	9.06734e-06	-0.323198	0.0706872	0.00389961	0.00588461	0.000406455	NR1	rs7789303
EPO	7:101157024:C:T	3402	436555	0.510256	0.00364999	-0.308325	0.104643	0.763024	0.339612	0.000335771	NR1	rs35811390
EPS8L2	11:1347344:G:A	4018	641112	0.376923	0.000252699	0.332076	0.0888923	0.171783	0.139045	0.000204941	NR1	rs12788649
ERBB2	17:39705465:T:C	2301	5400	0.779487	0.000801768	0.225559	0.0661195	0.237476	0.168767	0.000419968	NR1	rs2952155
ERBB3	12:55313600:C:T	2384	-766566	0.153846	0.00409728	0.326199	0.112145	0.538446	0.277849	0.000599092	NR1	rs11171407
ERBB4	2:212119730:G:A	4045	-419073	0.630769	8.22749e-05	0.292806	0.0726215	0.0519948	0.0589595	0.000280947	NR1	rs7426206
EREG	4:73869527:A:G	3500	-495619	0.235897	0.00288318	0.323863	0.107158	0.549645	0.280767	0.000378028	NR1	rs2071425
ERP44	9:99966726:A:G	2794	-132275	0.0538462	0.000724023	-0.646115	0.187772	0.170283	0.136172	0.000558891	NR1	rs10988927
ESAM	11:124863853:C:G	4595	101562	0.151282	0.00158258	0.235051	0.0732457	0.549545	0.279523	0.000270001	NR1	rs12796794
ESM1	5:54074516:C:T	4635	-911078	0.202564	0.000606767	0.369306	0.105766	0.264174	0.181338	0.000295259	NR1	rs3776686
EZR	6:158168904:C:G	4959	-650465	0.151282	0.000724032	0.390203	0.1134	0.335266	0.207841	0.000272383	NR1	rs57157874
F11R	1:160703478:G:T	3146	-317675	0.0717949	0.00141301	-0.439168	0.135401	0.473353	0.257236	0.000251636	NR1	rs75270682
F2R	5:76663238:G:A	4152	-52889	0.469231	2.50727e-07	0.300151	0.0559319	0.00049995	0.000694249	0.000220155	NR1	rs3797446
F3	1:94792113:C:T	4010	250353	0.707692	8.74621e-05	-0.368737	0.0918119	0.0534947	0.0613821	0.000264696	NR1	rs12758540
F7	13:113110921:G:A	4109	5129	0.171795	1.74353e-17	-0.572887	0.0604261	9.999e-05	2.07781e-12	0.00019729	NR1	rs2774033
FABP1	2:88440313:C:T	1120	312250	0.361538	0.00284962	0.21281	0.0703267	0.328567	0.203638	0.000855464	NR1	rs6547778
FABP2	4:119303410:T:C	3732	-18729	0.469231	0.00636347	0.254496	0.0921575	0.808219	0.350365	0.000497502	NR1	rs4834767
FABP4	8:82178053:G:C	3247	694819	0.164103	0.00257846	0.281671	0.0921179	0.528947	0.275293	0.000432327	NR1	rs7816491
FABP5	8:80411901:C:G	2846	-868636	0.0564103	0.000345477	-0.517046	0.141656	0.115388	0.102824	0.000413947	NR1	rs7830105
FABP6	5:160893121:G:A	4403	663614	0.130769	0.000659241	0.513279	0.148006	0.348665	0.212871	0.000183052	NR1	rs10454976
FABP9	8:81798019:C:G	3222	336439	0.0410256	0.0430633	-0.400079	0.196325	0.9997	0.399907	0.000439894	NR1	rs113284105
FAM3B	21:41344348:G:A	5315	27546	0.074359	2.72679e-08	-0.972881	0.16716	0.00029997	0.000161182	9.16049e-05	NR1	rs4818234
FAM3C	7:121833183:G:C	3056	436874	0.5	0.00130445	-0.203437	0.0622601	0.310469	0.198254	0.00044959	NR1	rs7811200
FAP	2:162845853:C:T	2304	602407	0.0461538	0.00974173	0.410824	0.157201	0.766123	0.340729	0.000600534	NR1	rs62171451
FAS	10:89009208:A:G	4012	18409	0.305128	0.00225204	-0.219344	0.0707505	0.677232	0.318348	0.000226966	NR1	rs7911226
FASLG	1:173418019:G:A	3422	758915	0.9	0.00421874	0.383575	0.132307	0.745225	0.336756	0.00034918	NR1	rs11993
FBP1	9:94510478:A:G	3441	-129041	0.0923077	0.00522533	0.491539	0.173804	0.756824	0.338849	0.000438767	NR1	rs7864516
FCAR	19:54867770:C:T	3807	-6466	0.241026	4.18996e-17	0.84651	0.0906109	9.999e-05	2.6776e-12	0.000117026	NR1	.
FCER2	19:7695134:T:A	4208	-6998	0.164103	0.00399057	-0.318715	0.109248	0.933607	0.38325	0.000136947	NR1	rs11260015
FCGR2A	1:161506415:A:G	3585	957	0.210256	1.03181e-52	-1.16904	0.05284	9.999e-05	3.66612e-42	0.000246294	NR1	rs9427398
FCGR2B	1:161509955:A:G	3519	-153189	0.382051	3.82098e-07	-0.492443	0.093312	0.00039996	0.000829584	0.000210522	NR1	rs1801274
FCGR3B	1:161647576:A:C	3530	16399	0.317949	3.23049e-08	-0.470363	0.0812904	9.999e-05	0.000109699	0.000238886	NR1	rs1771576
FCN2	9:134860694:A:T	4624	-20117	0.0897436	1.27452e-06	-0.646605	0.128878	0.0009999	0.00325884	0.000104442	NR1	rs57136797
FCRL1	1:157802090:C:T	4300	-18031	0.494872	3.44324e-09	-0.489953	0.0787193	9.999e-05	1.64672e-05	0.000227795	NR1	rs4971154
FCRL2	1:157766308:A:G	4296	-10825	0.197436	5.84175e-12	0.742653	0.100556	9.999e-05	6.42963e-08	0.000259684	NR1	rs112537702
FCRL3	1:157698600:T:C	4129	-2170	0.428205	6.75403e-24	0.933841	0.0794944	9.999e-05	4.93262e-18	0.000220877	NR1	rs7522061
FCRL5	1:157570314:T:G	4012	17798	0.358974	1.16526e-06	-0.432962	0.0859585	0.00079992	0.00179164	0.000272367	NR1	rs7523341
FCRL6	1:159824724:G:A	3345	22363	0.174359	1.74317e-15	-0.973227	0.111285	9.999e-05	9.55304e-11	0.000253981	NR1	rs2494495
FCRLB	1:161718641:T:C	3509	-2904	0.0717949	8.53845e-07	0.889603	0.174271	0.00159984	0.00174432	0.000251429	NR1	rs7549830
FETUB	3:185742215:C:T	3849	-898185	0.0487179	0.000281734	-0.604486	0.163107	0.221378	0.16276	0.000145551	NR1	rs182210682
FGF19	11:70375648:A:G	4212	671625	0.207692	0.000247528	-0.478682	0.127945	0.178982	0.140142	0.000191831	NR1	rs11236048
FGF21	19:47968954:A:G	4013	-786571	0.110256	0.00291063	-0.39109	0.129531	0.810719	0.350365	0.000200456	NR1	rs59082129
FGF23	12:4042839:C:T	3886	-336874	0.887179	0.000505823	-0.566454	0.15986	0.379662	0.223058	0.000124589	NR1	rs2724199
FGF5	4:80263187:A:T	3278	-3478	0.233333	6.97697e-12	0.680205	0.0924881	9.999e-05	8.63946e-08	0.000445855	NR1	rs16998073
FGFBP1	4:15944774:C:T	3952	6033	0.107692	0.000257114	0.604191	0.161938	0.157184	0.129421	0.000218034	NR1	rs73228494
FGFR2	10:122257702:G:A	4500	659257	0.561538	0.00043586	0.252255	0.0703577	0.29797	0.19365	0.000152832	NR1	rs9630108
FIS1	7:100785983:T:A	3818	-459099	0.561538	0.00112872	-0.298349	0.0901141	0.431257	0.242863	0.000306438	NR1	rs160602
FKBP4	12:2032152:G:A	4081	-762819	0.512821	0.00173457	0.234994	0.0738728	0.735626	0.334224	0.000153678	NR1	rs11062084
FKBP5	6:36380912:T:C	3091	691996	0.505128	0.000627767	-0.296088	0.0850343	0.222578	0.162085	0.000366492	NR1	rs1076928
FLRT2	14:85609613:G:T	4400	79468	0.889744	7.98077e-10	0.754688	0.116101	9.999e-05	7.54409e-06	0.000251998	NR1	rs2753615
FLT1	13:28618693:T:C	4305	123564	0.112821	0.00306947	0.39042	0.130041	0.793221	0.344189	0.000217605	NR1	rs17086907
FLT3	13:27804222:A:T	4134	-296355	0.0871795	0.00209622	-0.533955	0.170997	0.660234	0.312575	0.000262014	NR1	rs11618253
FLT3LG	19:49798563:A:G	3171	324347	0.130769	0.000232091	-0.468299	0.124588	0.138786	0.114229	0.000194138	NR1	.
FLT4	5:180642124:G:A	3486	-7477	0.446154	0.000447668	0.342911	0.0958433	0.283172	0.187074	0.000195831	NR1	rs307808
FMNL1	17:46044213:T:C	4550	822327	0.302564	0.00181501	-0.352629	0.11134	0.468853	0.255282	0.000414354	NR1	rs72836318
FOLR1	11:73184797:A:G	2999	992656	0.589744	0.00961452	-0.165991	0.0634031	0.90231	0.376211	0.000392515	NR1	rs1783578
FOLR2	11:72607431:C:G	3009	390636	0.561538	7.06785e-06	0.321783	0.0694941	0.0039996	0.00665995	0.000408261	NR1	rs90409
FOLR3	11:72145571:C:T	3058	9845	0.0820513	4.94977e-23	1.49902	0.130959	9.999e-05	4.34224e-17	0.000478198	NR1	rs146694036
FRZB	2:182829772:C:T	4208	-36866	0.130769	2.71024e-10	-0.814212	0.121523	9.999e-05	2.13892e-06	0.000417193	NR1	rs7593100
FST	5:54003863:C:G	4903	523233	0.130769	0.00155645	-0.447721	0.139297	0.560644	0.283748	0.000275129	NR1	rs3822497
FSTL3	19:775307:A:G	2492	98914	0.120513	0.00117994	-0.273361	0.0828978	0.557244	0.280938	0.0001741	NR1	rs73919844
FUCA1	1:23843968:C:T	3043	-24323	0.258974	2.95806e-07	-0.568307	0.106593	0.00029997	0.000565267	0.000363617	NR1	rs10917430
FURIN	15:91043007:C:T	4096	174418	0.510256	0.000398616	-0.236479	0.0655014	0.232977	0.168767	0.000223465	NR1	.
FUS	16:30422409:A:G	1367	-757731	0.897436	0.00192926	-0.445626	0.141544	0.226777	0.164271	0.000906577	NR1	rs4433823
FUT3_FUT5	19:5841345:G:T	3685	-10105	0.0564103	6.50326e-07	-0.973845	0.188597	0.00049995	0.00156636	0.000157692	NR1	rs3760775
FUT8	14:65370785:C:T	3657	-41946	0.910256	2.55348e-11	-0.923271	0.129562	9.999e-05	3.7209e-07	0.000353235	NR1	rs8020305
FXN	9:69287608:A:G	2774	251855	0.161538	0.00150456	-0.302924	0.093946	0.445355	0.24921	0.000335059	NR1	rs10867296
FYB1	5:38731246:A:C	3870	-488318	0.641026	0.0144753	0.213298	0.0863651	0.981802	0.396377	0.000369778	NR1	rs4869594
GAL	11:68796420:G:A	3580	111875	0.0974359	0.00639651	0.453066	0.164168	0.906309	0.376696	0.000293426	NR1	rs7129243
GALNT10	5:153254927:G:C	4184	-935807	0.130769	0.000141826	-0.514403	0.132228	0.0907909	0.0835129	0.000274048	NR1	rs76527501
GALNT2	1:230189055:G:A	4166	121816	0.194872	4.91722e-05	-0.495102	0.118941	0.0441956	0.0499222	0.000195024	NR1	rs641038
GALNT3	2:166080585:T:C	3947	286337	0.402564	2.7995e-07	-0.460711	0.0862242	0.00029997	0.00059752	0.000398448	NR1	rs569745
GALNT7	4:173269071:G:A	3260	100259	0.446154	0.000647192	0.335738	0.0966638	0.251675	0.17723	0.000309104	NR1	rs13128039
GAS6	13:113408693:A:T	2919	-455384	0.102564	0.000459268	0.401849	0.112542	0.20008	0.154032	0.00029366	NR1	rs9549772
GCG	2:162266352:G:A	2243	114104	0.0692308	0.004023	0.58989	0.202384	0.508549	0.267585	0.00059478	NR1	rs34162299
GCNT1	9:76489891:T:C	4651	30708	0.530769	7.26148e-06	0.381425	0.0824866	0.00979902	0.0142684	0.000143489	NR1	rs503222
GDF15	19:19244128:T:C	3335	857969	0.335897	0.000628203	0.19795	0.0568529	0.30237	0.194377	0.00018838	NR1	rs10402294
GDF2	10:47359311:A:G	602	36856	0.125641	0.00804616	0.362061	0.135064	0.542646	0.277713	0.00100429	NR1
GDNF	5:37785815:G:C	3276	-54227	0.0974359	5.58271e-06	-0.672648	0.143576	0.00369963	0.00614283	0.000383254	NR1	rs62358929
GFAP	17:45690438:A:G	3755	774937	0.0615385	0.00269096	-0.526649	0.173	0.60434	0.297648	0.000428723	NR1	.
GFER	16:1526426:C:G	3490	-457768	0.074359	2.31536e-05	0.630292	0.144944	0.0147985	0.0229406	0.000293867	NR1	rs113971932
GFRA1	10:116242259:T:C	3020	-30948	0.161538	9.01084e-07	-0.471413	0.0925608	0.00039996	0.00108459	0.000391631	NR1	rs11197603
GFRA2	8:21313566:A:C	4136	-475310	0.541026	0.000472481	-0.365151	0.102494	0.305469	0.196497	0.00020116	NR1	rs2926434
GFRA3	5:138251260:C:T	2359	-23362	0.0538462	0.00160018	-0.56217	0.175365	0.277472	0.186707	0.000636217	NR1	rs112424634
GGH	8:62981361:G:A	3739	-57446	0.0333333	0.000250311	0.571276	0.152817	0.0885911	0.0829861	0.000609434	NR1	rs4739032
GGT1	22:24891922:A:C	3082	288728	0.302564	0.00171133	-0.21719	0.0681875	0.530147	0.275924	0.000236868	NR1	rs5752014
GGT5	22:23595964:A:G	3602	-649119	0.0538462	0.000501658	0.754576	0.21281	0.262774	0.180561	0.00021749	NR1	rs141809079
GH1	17:63114445:T:A	1623	-804395	0.0461538	0.00251428	0.572852	0.18686	0.30017	0.194129	0.000773882	NR1	rs77746721
GH2	17:62953479:A:G	1669	-928466	0.361538	0.000253201	0.376922	0.100912	0.0432957	0.0492574	0.00079282	NR1	rs111390602
GHRL	3:10593401:C:A	3310	300453	0.135897	0.000641086	0.427322	0.122936	0.353465	0.214627	0.000220911	NR1	rs76893525
GKN1	2:68951984:T:C	3470	-22653	0.807692	0.00467499	0.331234	0.115605	0.814519	0.351317	0.000318014	NR1	rs10175263
GLB1	3:32878888:C:G	3638	-218259	0.0948718	0.000899748	0.514832	0.15242	0.385861	0.225039	0.000260397	NR1	rs62251957
GLO1	6:38682852:T:G	4210	-20294	0.382051	8.85397e-14	-0.526139	0.0649579	9.999e-05	1.37047e-09	0.000238152	NR1	rs4746
GLOD4	17:1041066:C:T	3512	258785	0.376923	0.00162353	0.135027	0.0421788	0.712929	0.32886	0.000144961	NR1	rs2440051
GLRX	5:95827733:A:G	3333	5006	0.138462	2.4828e-18	0.857079	0.0875767	9.999e-05	4.05811e-13	0.00027419	NR1	rs17462893
GMPR	6:16743678:A:G	3632	505090	0.0615385	0.000637958	-0.476503	0.13703	0.335366	0.207841	0.000196256	NR1	rs16878970
GNLY	2:85705880:C:T	3395	11521	0.187179	1.16172e-15	0.933445	0.105941	9.999e-05	1.05021e-10	0.000332752	NR1	.
GOLM2	15:43437753:T:C	1832	-850967	0.0794872	0.00608895	-0.457654	0.164829	0.512449	0.272756	0.00093871	NR1	rs34438389
GP1BA	17:5878690:C:T	4636	946412	0.261538	3.84448e-05	0.27841	0.0659118	0.0308969	0.0395031	0.000232453	NR1	rs7211278
GP2	16:19590309:G:T	3625	-737205	0.364103	0.00244397	0.307471	0.100003	0.633637	0.306444	0.000330617	NR1	rs12325023
GP6	19:55025227:G:A	4240	-13038	0.84359	1.05039e-18	0.973586	0.0981365	9.999e-05	1.54719e-13	0.000100521	NR1	.
GPA33	1:167826774:A:C	3721	736396	0.374359	0.000458115	0.354612	0.0992933	0.234077	0.167663	0.000232205	NR1	rs12407873
GPC1	2:240462987:G:A	5230	27323	0.1	0.000147906	0.495578	0.127753	0.144286	0.119094	0.00014028	NR1	rs77418648
GPC5	13:91768734:A:G	3708	370112	0.261538	1.32094e-24	-0.992017	0.0827157	9.999e-05	1.4945e-18	0.000293179	NR1	rs342704
GPNMB	7:23390799:C:T	4447	144023	0.176923	0.000138384	-0.374741	0.0961674	0.0981902	0.0914943	0.000293148	NR1	rs79980740
GPR37	7:124456673:C:A	4373	-309120	0.241026	4.94217e-14	-0.772806	0.0942811	9.999e-05	2.00146e-09	0.00052827	NR1	rs6973149
GRAP2	22:39139590:C:T	2883	-761495	0.0589744	0.00138254	0.67664	0.208195	0.372363	0.221795	0.000408273	NR1	rs12170696
GRN	17:44543175:A:T	3086	197872	0.741026	7.84663e-05	0.29518	0.0729901	0.0416958	0.0463951	0.000355799	NR1	rs4793118
GRPEL1	4:7611140:A:G	5673	543075	0.382051	0.00148035	0.265913	0.0823422	0.842116	0.358305	8.09014e-05	NR1	rs17465361
GSTA1	6:52777970:C:T	4119	-25847	0.512821	9.04687e-08	0.335487	0.0601472	9.999e-05	0.00028113	0.000218671	NR1	rs2608652
GSTA3	6:52780086:T:C	4091	-129613	0.430769	0.000362783	0.283612	0.0779909	0.208479	0.156867	0.000234885	NR1	rs9382137
GUCA2A	1:42411547:G:A	3513	246801	0.225641	0.00104899	0.254904	0.0764897	0.338066	0.209492	0.000384206	NR1	rs6677163
GUSB	7:65333345:G:C	2666	-648869	0.279487	0.00323105	-0.234678	0.078597	0.247075	0.171442	0.00168825	NR1	rs13239089
GZMA	5:54718316:C:T	4427	-384331	0.258974	0.00396232	0.266436	0.0912552	0.782522	0.343989	0.000284146	NR1	rs7705539
GZMB	14:24665518:A:T	4444	31327	0.882051	0.00038752	0.476156	0.131602	0.216878	0.159691	0.000213648	NR1	rs1957520
GZMH	14:24421804:T:C	4405	-187882	0.928205	0.00486963	-0.459523	0.161142	0.89921	0.374699	0.000187715	NR1	rs4981514
HAGH	16:1899557:G:A	3527	72731	0.0615385	2.77036e-05	-0.490243	0.113884	0.0166983	0.0242403	0.000264623	NR1	rs112276599
HAO1	20:7053814:C:A	4557	-886645	0.123077	0.000832318	-0.397759	0.116971	0.405559	0.234357	0.000221234	NR1	rs78567526
HARS1	5:139800694:T:G	2579	-890677	0.238462	0.00165797	0.275769	0.0863158	0.360564	0.214627	0.000493272	NR1	rs72794891
HAVCR1	5:157036347:C:T	4222	-22770	0.333333	4.63669e-12	0.499276	0.0672361	9.999e-05	9.76276e-08	0.000391465	NR1	rs10462975
HAVCR2	5:156307605:G:A	4324	-801440	0.074359	0.00195448	-0.292878	0.0931455	0.572143	0.286454	0.000379973	NR1	rs7732769
HBEGF	5:140340406:T:C	2401	-6198	0.305128	0.000386248	0.162897	0.0450109	0.09969	0.0914839	0.00056678	NR1	rs4150221
HBQ1	16:219907:A:G	2186	39447	0.166667	9.18187e-10	-0.583701	0.0901598	9.999e-05	4.06164e-06	0.000330841	NR1	rs11641118
HCLS1	3:122020639:T:C	3809	359735	0.330769	0.0121598	0.183422	0.0723934	0.944906	0.387538	0.000422677	NR1	rs12485356
HDGF	1:156734821:G:A	3125	-16855	0.317949	9.71227e-49	1.09236	0.0530563	9.999e-05	4.59021e-39	0.00027805	NR1	rs61813557
HEXIM1	17:44563303:C:G	4409	-585173	0.674359	0.00321564	0.255465	0.085515	0.643436	0.310079	0.000429912	NR1	rs8072850
HGF	7:81697749:T:C	3639	-72299	0.853846	0.00106	0.284409	0.0854224	0.427157	0.241298	0.000209673	NR1	rs4728474
HLA-E	6:31239091:G:C	13285	749581	0.397436	2.39345e-05	0.325999	0.0751072	0.040496	0.0473104	0.00030307	NR1	.
HMBS	11:119971999:A:G	3662	887117	0.14359	0.00939189	0.19428	0.0739739	0.970603	0.394084	0.000291996	NR1	rs17123506
HMOX1	22:36028122:C:A	4017	647025	0.1	0.00270364	0.468171	0.153866	0.733727	0.335531	0.000221335	NR1	rs76819114
HMOX2	16:5124274:C:A	3649	647875	0.628205	0.000534044	0.353243	0.100124	0.337966	0.207841	0.000166818	NR1	rs4786614
HNMT	2:138002079:C:T	3792	37605	0.110256	6.12864e-29	-1.22649	0.0909156	9.999e-05	1.83433e-22	0.000323181	NR1	rs11558538
HPCAL1	2:9818240:A:G	5069	-484665	0.0897436	0.000229538	0.485347	0.129021	0.20348	0.154032	0.000128011	NR1	rs16867181
HPGDS	4:94254718:T:C	3732	-88119	0.161538	0.000201531	0.474412	0.12495	0.10019	0.0905048	0.000333702	NR1	rs28733161
HS3ST3B1	17:13933638:G:A	5454	-367444	0.392308	4.16642e-06	0.429486	0.0903791	0.00559944	0.00941021	0.000112248	NR1	rs62053895
HS6ST1	2:128293206:C:T	4201	-25663	0.117949	0.00056162	-0.467557	0.133064	0.253675	0.175601	0.000292623	NR1	rs35473853
HSD11B1	1:210667006:G:A	3971	962159	0.0538462	0.000990262	0.733346	0.218939	0.446955	0.25025	0.000209084	NR1	rs35004650
HSPA1A	6:31361514:T:A	12562	-454030	0.0820513	0.000609007	-0.50739	0.145356	0.483052	0.25853	0.000269949	NR1	.
HSPB1	7:76294901:G:T	2711	-7773	0.251282	0.00048614	-0.375186	0.105548	0.19508	0.150095	0.000428005	NR1	rs2908203
HSPB6	19:35768592:C:A	3211	11562	0.189744	0.00334026	-0.245121	0.0823901	0.752225	0.337582	0.000228321	NR1	rs231216
HSPG2	1:21878013:C:T	3849	-59298	0.0820513	1.61292e-05	-0.314245	0.0708439	0.0134987	0.0217802	0.000208815	NR1	rs747546
HTRA2	2:75280994:C:A	2968	751060	0.251282	0.00029893	-0.381615	0.103423	0.129287	0.10961	0.000273541	NR1	rs59355167
HYAL1	3:49826050:C:T	2074	-477525	0.15641	0.000562689	-0.248647	0.0707746	0.0812919	0.077479	0.00126222	NR1	rs73079014
HYOU1	11:119821316:G:C	3635	764110	0.0717949	0.000579365	0.444326	0.126773	0.262174	0.180674	0.000301056	NR1	rs118188470
ICAM1	19:10285007:A:G	3818	13886	0.461538	1.23526e-14	0.35786	0.0424712	9.999e-05	3.92502e-10	0.000288438	NR1	rs5498
ICAM2	17:63979250:G:A	1646	-41384	0.902564	0.00322332	-0.458551	0.153536	0.353165	0.213611	0.000859361	NR1	rs7211557
ICAM3	19:10341244:C:T	3866	1619	0.348718	2.16353e-09	0.502843	0.0796569	9.999e-05	1.12162e-05	0.000322578	NR1	rs61451658
ICAM4	19:11118848:T:C	3859	831892	0.0641026	0.0119675	0.463175	0.18239	0.979002	0.396099	0.000291495	NR1	rs17242541
ICAM5	19:10291455:T:C	3866	1502	0.515385	1.38337e-16	0.652882	0.0713339	9.999e-05	6.70865e-12	0.000303619	NR1	rs901886
ICOSLG	21:44233876:A:G	4204	-7068	0.228205	2.70837e-07	0.604736	0.113032	0.00039996	0.000786761	0.000220845	NR1	rs7281454
IDUA	4:959910:A:C	3591	-27135	0.551282	7.27505e-08	0.532709	0.0947494	9.999e-05	0.000230809	0.000301844	NR1	rs4690326
IFNG	12:68351132:T:C	3977	191391	0.779487	0.0033864	0.399107	0.134347	0.858714	0.363579	0.000179062	NR1	rs1038163
IFNGR1	6:137159612:T:C	3135	-59774	0.0897436	0.000182376	-0.336197	0.0879278	0.0992901	0.0905048	0.000246717	NR1	rs9765914
IFNGR2	21:33415005:A:G	3603	11591	0.117949	5.68317e-37	1.51422	0.0929623	9.999e-05	7.53987e-29	0.00022659	NR1	.
IFNLR1	1:24199645:G:T	3323	12355	0.0820513	4.19192e-05	-0.687028	0.163482	0.0214979	0.0302982	0.000250786	NR1	rs12046369
IGF1R	15:97897842:T:C	4762	-750698	0.364103	0.000301463	-0.255332	0.069242	0.254175	0.178286	0.000152562	NR1	rs9944265
IGF2R	6:160073489:C:T	4573	104406	0.171795	1.55704e-08	0.621655	0.104812	9.999e-05	6.06634e-05	0.000261665	NR1	rs2282140
IGFBP1	7:46639225:T:C	4600	750736	0.0923077	0.001355	-0.416826	0.128014	0.49985	0.264578	0.000286132	NR1	rs71545945
IGFBP2	2:216799506:C:T	3416	166085	0.105128	0.00198715	-0.319407	0.101749	0.652735	0.312943	0.000229046	NR1	rs61510556
IGFBP3	7:45921046:G:C	4647	-227	0.451282	4.78562e-09	0.343233	0.0557118	9.999e-05	2.47457e-05	0.000269751	NR1	rs2854746
IGFBP4	17:41022706:T:A	3076	579255	0.0615385	0.0166062	0.262722	0.108633	0.974903	0.394571	0.000429439	NR1	.
IGFBP6	12:52444038:A:G	4163	-653630	0.612821	0.00271287	-0.130949	0.0430522	0.743926	0.336223	0.000217108	NR1	rs597830
IGFBP7	4:57078665:C:T	4748	-31721	0.125641	4.41206e-06	0.524696	0.11072	0.00539946	0.00729364	0.000187292	NR1	rs4865176
IGFBPL1	9:37496201:G:A	2606	-928254	0.320513	0.000777118	-0.317277	0.0927587	0.30157	0.195914	0.000307486	NR1	rs4878694
IGSF3	1:117576014:C:T	3115	908280	0.169231	0.000929514	0.352959	0.104792	0.322968	0.203236	0.00030693	NR1	rs10923346
IGSF8	1:159199392:C:G	3298	-899228	0.761538	0.000423933	-0.297795	0.0828799	0.213279	0.157467	0.000249437	NR1	rs862997
IL10	1:206788788:T:C	2350	16293	0.81282	0.00104682	-0.456713	0.137022	0.315268	0.198713	0.000379741	NR1	rs2015273
IL10RA	11:117714887:C:T	3871	-271508	0.907692	0.00183914	0.535549	0.169313	0.631637	0.306444	0.00024059	NR1	rs7930469
IL10RB	21:33291734:C:T	3569	25366	0.510256	3.48039e-17	0.565291	0.0603194	9.999e-05	3.72299e-12	0.000247462	NR1	rs2843700
IL12A_IL12B	5:159387525:A:C	3881	57037	0.728205	0.000491683	0.330929	0.0931817	0.245775	0.17511	0.000277751	NR1	rs10045431
IL12B	5:159387525:A:C	3881	57037	0.728205	0.000157195	0.347782	0.0900271	0.0960904	0.0889074	0.000269387	NR1	rs10045431
IL12RB1	19:18103711:T:C	3687	16776	0.297436	2.0933e-07	-0.60722	0.112361	0.00039996	0.000706317	0.000181262	NR1	rs11668601
IL15	4:140715257:C:G	3737	-921327	0.392308	0.00265005	0.28242	0.0926251	0.608039	0.298903	0.000323821	NR1	rs13103762
IL15RA	10:5832995:A:G	5483	-144549	0.348718	0.000302482	0.365209	0.0990636	0.286471	0.191474	0.000119838	NR1	rs11599388
IL16	15:81307465:C:T	3767	110585	0.0487179	4.05311e-09	-0.910816	0.147077	9.999e-05	2.439e-05	0.000202272	NR1	rs17875543
IL17C	16:88565203:T:G	4923	-73370	0.325641	0.00244439	-0.318134	0.103473	0.854115	0.361823	0.000150956	NR1	rs62050265
IL17D	13:20729945:G:A	3916	26245	0.492308	1.28163e-05	-0.427982	0.0953067	0.0079992	0.0138624	0.000269218	NR1	rs9509356
IL17RA	22:17142785:T:C	2787	57784	0.207692	5.10007e-09	0.531613	0.0864607	9.999e-05	1.82554e-05	0.000190722	NR1	rs11089413
IL17RB	3:53842191:A:G	3475	-4378	0.641026	3.42728e-23	-0.880494	0.0765512	9.999e-05	2.41223e-17	0.000228862	NR1	rs6801605
IL18	11:112853509:T:C	3289	689414	0.435897	0.000272233	0.35449	0.0954101	0.105289	0.0928077	0.000403833	NR1	.
IL18BP	11:71145029:A:G	3041	-853881	0.420513	0.00402795	-0.123941	0.0425286	0.673633	0.317627	0.000436707	NR1	.
IL18R1	2:102373274:A:G	3661	17477	0.774359	1.64614e-30	-1.01731	0.0724924	9.999e-05	1.13155e-22	0.000339142	NR1	rs2041740
IL18RAP	2:102459966:C:T	3663	36805	0.15641	0.000753523	-0.468046	0.136481	0.261474	0.180141	0.000414214	NR1	rs11690532
IL19	1:207402897:C:G	2350	632123	0.0717949	0.000279915	0.640063	0.172624	0.105189	0.0937988	0.000362103	NR1	rs17026687
IL1R1	2:101669367:G:A	3780	-473380	0.292308	0.000561729	0.259628	0.0738901	0.218278	0.160519	0.000379228	NR1	rs115064623
IL1R2	2:101999692:T:G	4004	7731	0.389744	2.71759e-08	-0.472216	0.0811265	9.999e-05	9.24001e-05	0.000357743	NR1	rs2310170
IL1RAP	3:190611083:A:G	5246	96997	0.851282	2.94214e-26	-1.1415	0.0908499	9.999e-05	4.46609e-20	0.000175562	NR1	rs6793294
IL1RL1	2:102315366:C:G	3730	3802	0.392308	1.9333e-15	-0.681902	0.0781226	9.999e-05	1.21489e-10	0.000332669	NR1	rs13020553
IL1RL2	2:102162001:T:C	3736	-25023	0.54359	2.7198e-05	-0.400267	0.0928854	0.0147985	0.0217044	0.000355664	NR1	.
IL1RN	2:113109711:T:C	3140	-17888	0.507692	2.50423e-06	-0.318506	0.0654389	0.00119988	0.00281031	0.000349896	NR1	rs55709272
IL22RA1	1:24866664:G:A	3336	723523	0.623077	0.000473501	0.407078	0.114281	0.217678	0.159691	0.000274234	NR1	rs3131513
IL2RA	10:6040595:C:T	5343	-21773	0.107692	2.38929e-10	0.725415	0.107898	9.999e-05	2.69229e-06	0.000111789	NR1	rs11256464
IL32	16:3002757:G:C	2603	-62884	0.589744	0.00792948	-0.226706	0.084411	0.928507	0.382928	0.000296064	NR1	rs986095
IL4R	16:27290063:G:C	3981	-23912	0.253846	9.10524e-05	-0.349179	0.0871671	0.0780922	0.0755021	0.000160393	NR1	rs8050048
IL5RA	3:3112912:G:A	5294	2537	0.230769	4.40015e-06	0.493721	0.10417	0.00649935	0.0108487	0.000109468	NR1	rs9809884
IL6	7:23067797:G:A	4398	340596	0.533333	0.00433673	0.245524	0.0849553	0.930007	0.38325	0.000169259	NR1	rs6948678
IL6R	1:154447611:G:A	2552	42267	0.379487	3.04189e-42	0.774077	0.0425887	9.999e-05	5.8677e-34	0.000357378	NR1	rs61812598
IL6ST	5:56450515:C:T	3824	455551	0.15641	0.000818378	0.339717	0.0997578	0.323468	0.205006	0.000245306	NR1	rs17656329
IL7	8:78870852:G:A	3833	65388	0.187179	0.0171524	0.181407	0.0753901	0.985601	0.39674	0.000398648	NR1	rs10110533
IL7R	5:35881274:G:T	3832	24382	0.215385	2.46067e-16	-0.872327	0.096278	9.999e-05	2.67128e-11	0.000269185	NR1	rs11742240
INHBC	12:57285631:G:A	2578	-149154	0.128205	1.86361e-09	-0.692431	0.109201	9.999e-05	6.4972e-06	0.000529252	NR1	rs56205943
INPP1	2:190156171:A:T	2877	-187419	0.248718	0.000746832	0.35778	0.104249	0.218078	0.159691	0.000429984	NR1	rs6709775
INPPL1	11:72293791:G:A	3001	69023	0.502564	0.00118383	-0.310998	0.0943394	0.321568	0.203918	0.000398409	NR1	rs12793524
IPCEF1	6:154150060:A:G	4512	-206744	0.0794872	0.00131296	-0.484006	0.148214	0.568143	0.286454	0.000179415	NR1	rs13196610
IQGAP2	5:75533466:G:A	3899	-869820	0.0871795	0.00246404	-0.556499	0.18115	0.708929	0.32815	0.000214758	NR1	rs11749414
IRAG2	12:25386694:A:T	4608	333987	0.176923	0.00264663	0.362497	0.118872	0.822318	0.352931	0.000190537	NR1	rs7966714
IRAK4	12:43984511:A:G	3695	225559	0.0717949	0.000599717	-0.55744	0.159494	0.19658	0.152031	0.000428984	NR1	rs12306662
ISLR2	15:74935802:C:T	2791	805215	0.0692308	0.000625701	-0.659918	0.189472	0.206179	0.157868	0.000422328	NR1	rs78324724
ISM1	20:13254510:T:C	3841	33235	0.417949	0.000675352	-0.29366	0.0848479	0.313169	0.198713	0.000248559	NR1	rs6074574
ITGA11	15:68449463:C:T	2703	17299	0.397436	0.0013448	0.280327	0.0860328	0.346065	0.211445	0.000423311	NR1	rs8028117
ITGA5	12:53782649:T:C	3441	-636618	0.0871795	0.00393027	0.330017	0.112929	0.748825	0.336756	0.00028135	NR1	rs4759298
ITGAM	16:31331922:T:C	1362	71946	0.764103	0.000120203	0.37229	0.0946409	0.0216978	0.0289599	0.000873199	NR1	rs4594268
ITGAV	2:187526092:C:T	3355	936035	0.658974	0.00631995	-0.247977	0.0897208	0.60434	0.297404	0.000802166	NR1	rs2192825
ITGB1	10:33816800:G:A	4770	858569	0.548718	0.00490293	-0.119713	0.0420135	0.881012	0.369445	0.00026526	NR1	rs1331690
ITGB2	21:44252340:C:G	4455	-668560	0.374359	0.000320969	-0.244803	0.0666983	0.225377	0.164983	0.000213779	NR1	rs62226872
ITGB5	3:125731560:C:G	4086	844194	0.0589744	0.000803326	-0.450883	0.132192	0.328067	0.204621	0.000348699	NR1	rs2971271
ITGB6	2:160561010:G:A	3993	360737	0.294872	0.00118159	-0.34641	0.105063	0.340466	0.209492	0.000425411	NR1	rs7564531
ITGB7	12:53083834:C:A	4036	-123418	0.0641026	0.00363918	-0.564556	0.191544	0.805019	0.35046	0.000257344	NR1	rs113036093
ITIH3	3:52786995:A:G	2568	-7802	0.571795	5.79309e-05	-0.291544	0.0707406	0.0178982	0.0276607	0.000576537	NR1	rs1042779
JAM2	21:25007401:A:G	3662	-631858	0.84359	0.00085573	-0.225765	0.0665503	0.355864	0.214627	0.000266408	NR1	rs2409060
JCHAIN	4:71558864:A:T	3699	892355	0.0615385	0.000420372	-0.845152	0.235061	0.129487	0.110855	0.000510493	NR1	rs4694400
KAZALD1	10:100394935:T:C	2665	-667055	0.0820513	0.00084708	-0.536271	0.157942	0.265573	0.181338	0.000334366	NR1	rs76051614
KDR	4:55101517:C:T	3880	-24079	0.271795	5.67268e-05	-0.381418	0.0924289	0.0310969	0.0385502	0.000276596	NR1	rs7677779
KEL	7:142051252:T:C	2342	-911112	0.0461538	0.000163627	0.877461	0.227767	0.0485951	0.0531905	0.000396133	NR1	.
KIFBP	10:69888618:G:A	4774	899814	0.748718	0.00526409	-0.302076	0.106905	0.951305	0.388692	0.000189917	NR1	rs2763363
KIR2DL3	19:55403006:C:T	3750	664492	0.464103	0.00216344	0.278495	0.0894685	0.833917	0.357974	0.000130812	NR1	rs11672075
KIR3DL1	19:54863102:G:A	3749	46633	0.374359	4.34198e-11	-0.614262	0.087358	9.999e-05	5.50317e-07	0.000115786	NR1	.
KIRREL2	19:35890798:C:A	3212	33886	0.0461538	0.00427931	-0.674121	0.232903	0.805419	0.349864	0.000268253	NR1	rs58422001
KIT	4:54774060:T:C	3834	116102	0.171795	0.00159398	0.236971	0.0738943	0.492851	0.26362	0.00024578	NR1	rs3111803
KITLG	12:88548379:G:A	2461	-32093	0.823077	0.00119695	0.332252	0.100887	0.259974	0.179585	0.000536861	NR1	rs11104945
KLB	4:39484214:C:T	4439	77283	0.346154	1.87972e-14	-0.830121	0.0993343	9.999e-05	8.51408e-10	0.000239404	NR1	rs12504134
KLK1	19:50824837:G:A	4111	1049	0.610256	0.00023681	-0.412006	0.109771	0.225677	0.163636	0.000117545	NR1	rs2560934
KLK10	19:51019035:G:C	4327	-675	0.576923	3.13368e-16	0.720156	0.0798239	9.999e-05	1.13674e-11	0.000117929	NR1	rs2304157
KLK11	19:51262308:A:G	4314	235691	0.576923	0.000463283	0.271792	0.0761707	0.378062	0.223058	0.000108817	NR1	rs1710381
KLK12	19:51031874:A:G	4320	-3129	0.664103	6.50768e-28	-1.08603	0.0826744	9.999e-05	2.20891e-21	9.74998e-05	NR1	rs3745540
KLK13	19:51030161:C:G	4335	-34932	0.358974	3.35259e-08	-0.512173	0.0886299	0.00019998	0.000125629	0.000122006	NR1	rs11669237
KLK14	19:51605429:C:T	4358	522541	0.458974	5.95698e-05	-0.377349	0.0917175	0.0638936	0.0682855	0.000121155	NR1	rs7247244
KLK4	19:50909410:C:A	4339	-1986	0.54359	0.000149207	-0.352058	0.0908094	0.151285	0.125755	0.000128269	NR1	rs1654552
KLK6	19:50957874:C:G	4331	-11718	0.305128	5.56942e-07	0.434621	0.08363	0.00079992	0.00154639	0.00011757	NR1	rs12463132
KLK8	19:51002840:G:C	4314	1235	0.0538462	7.75843e-07	-0.745129	0.145377	0.00119988	0.00209454	0.000120887	NR1	rs10404395
KLRB1	12:10371301:G:A	4163	763384	0.205128	0.00266361	0.320063	0.105026	0.69733	0.325421	0.000288303	NR1	rs10845123
KLRD1	12:10318718:C:G	4593	10847	0.653846	2.19973e-11	-0.611229	0.0854564	9.999e-05	2.85219e-07	0.000257231	NR1	rs12813197
KRT18	12:52253413:A:T	4173	-695706	0.176923	0.00648236	-0.255787	0.0928374	0.947405	0.387804	0.000250067	NR1	rs11612499
KRT19	17:41759936:G:A	3437	231627	0.166667	0.00147343	0.389302	0.120498	0.391161	0.225358	0.000471269	NR1	.
KYAT1	9:129168498:C:G	2711	286547	0.0923077	7.86908e-06	-0.558044	0.121172	0.00279972	0.00659675	0.000325106	NR1	rs17439917
KYNU	2:143455016:C:T	3291	577351	0.120513	6.75027e-05	-0.355916	0.0871803	0.0332967	0.0405979	0.000341609	NR1	rs76049666
LACTB2	8:70217578:A:G	3550	-451608	0.866667	0.000308845	0.403492	0.109618	0.144686	0.120259	0.000295113	NR1	rs4738080
LAG3	12:6775910:G:A	3087	3389	0.54359	0.00298178	0.227749	0.0756247	0.744426	0.336756	0.000198449	NR1	rs3782735
LAIR1	19:54344298:C:A	4187	-20634	0.230769	1.05561e-08	-0.46029	0.0766206	0.00019998	5.46746e-05	0.000118377	NR1	.
LAIR2	19:54514267:C:T	3974	11435	0.128205	2.49724e-12	-1.02056	0.13548	9.999e-05	2.5611e-08	9.7049e-05	NR1	.
LAMA4	6:112844785:A:C	3165	590217	0.541026	0.000566567	-0.22752	0.064797	0.216878	0.160392	0.000365584	NR1	rs12209394
LAMP3	3:183092356:T:G	3447	-70379	0.602564	0.000243991	0.253658	0.0677284	0.112189	0.0991178	0.000311684	NR1	rs3732604
LAP3	4:17291615:C:T	3804	-285584	0.661538	0.00335974	-0.305632	0.102794	0.724628	0.333372	0.00029998	NR1	rs7694269
LAT	16:28010543:C:T	1726	-974510	0.0564103	0.00150606	0.384463	0.119245	0.238876	0.171074	0.00069696	NR1	rs76971590
LAT2	7:73463714:T:G	1437	-746293	0.15641	7.10054e-05	0.52935	0.130073	0.019798	0.0267336	0.000604641	NR1	.
LAYN	11:111551492:C:T	3259	10771	0.494872	4.11204e-10	0.328122	0.0495404	9.999e-05	1.84561e-06	0.000440447	NR1	rs663763
LBP	20:38349567:G:A	3212	3084	0.0666667	3.72546e-11	0.861333	0.122021	9.999e-05	3.86336e-07	0.00032069	NR1	rs1739654
LBR	1:226304579:T:C	3753	876540	0.179487	0.00520932	-0.215304	0.076102	0.807619	0.349864	0.000388566	NR1	rs56321125
LCN2	9:127401674:A:T	2077	-747780	0.528205	0.00128038	-0.174627	0.0533516	0.272173	0.184024	0.000509282	NR1	rs10987636
LDLR	19:11604074:G:A	3152	514610	0.120513	0.000747358	0.381862	0.111272	0.272873	0.18556	0.000345286	NR1	rs56276180
LEFTY2	1:225886863:T:G	3625	-54358	0.328205	4.65001e-14	-0.602502	0.0734135	9.999e-05	1.37509e-09	0.000325042	NR1	rs360057
LEP	7:128922593:G:A	3494	681314	0.45641	0.00483461	-0.17503	0.0613267	0.775922	0.34352	0.000357145	NR1	rs4731531
LEPR	1:66227081:T:C	3542	806412	0.633333	0.00137363	-0.300232	0.0923227	0.423858	0.238664	0.000312263	NR1	rs7528545
LGALS1	22:38105326:C:T	3225	429689	0.551282	0.000546002	-0.227859	0.0646999	0.276272	0.184479	0.000235099	NR1	rs5750536
LGALS3	14:55395805:A:G	3910	266552	0.0794872	3.09013e-11	-0.936374	0.132029	9.999e-05	2.41369e-07	0.000286013	NR1	rs76264591
LGALS4	19:39255172:C:T	3805	442226	0.15641	0.00282519	0.313469	0.103498	0.712929	0.32815	0.000262385	NR1	rs78605718
LGALS7_LGALS7B	19:38813762:G:A	3786	24561	0.0897436	0.00112516	-0.503792	0.152123	0.425957	0.239914	0.000303294	NR1	rs4802890
LGALS8	1:236588889:C:T	4133	64906	0.671795	1.49147e-27	1.01736	0.0781868	9.999e-05	5.28901e-21	0.000180831	NR1	rs768948
LGALS9	17:27647232:T:C	1969	16043	0.4	1.89858e-11	-0.374702	0.0521971	9.999e-05	1.36935e-07	0.000530585	NR1	rs4239242
LGMN	14:92824378:A:G	3981	75750	0.751282	0.0004143	0.330553	0.0918325	0.242776	0.171442	0.000239234	NR1	rs3818256
LHB	19:48107137:G:A	3686	-909955	0.338462	0.00125276	-0.323915	0.0987645	0.520248	0.274006	0.00019282	NR1	rs8101311
LHPP	10:124469341:A:G	4671	7517	0.133333	5.10512e-07	0.568993	0.109094	0.00089991	0.00141605	0.000154078	NR1	.
LIFR	5:39219513:T:C	3669	662866	0.792308	0.00416566	-0.323147	0.111304	0.822318	0.352931	0.000273292	NR1	rs6863066
LILRA2	19:54573515:A:G	3841	-276	0.14359	5.71515e-33	-1.13576	0.0762955	9.999e-05	2.24892e-26	8.99461e-05	NR1	.
LILRA5	19:54316893:G:A	4208	3726	0.230769	2.78344e-07	-0.507259	0.0949143	0.00019998	0.000911007	9.53533e-05	NR1	.
LILRB1	19:54292777:G:A	3855	-337708	0.0769231	2.23807e-09	-0.881167	0.139731	9.999e-05	1.38257e-05	0.000120372	NR1	.
LILRB2	19:54279064:C:T	4247	-2047	0.0871795	2.81616e-20	-1.24332	0.118636	9.999e-05	3.91273e-15	0.000102026	NR1	.
LILRB4	19:54348134:T:C	3864	-314852	0.115385	0.000555048	0.384706	0.109381	0.427357	0.242863	0.000109862	NR1	.
LILRB5	19:54255803:T:C	4279	-1471	0.55641	5.48307e-50	-1.22124	0.0579726	9.999e-05	2.91445e-41	9.60171e-05	NR1	rs10405357
LPCAT2	16:54872983:C:A	3960	-636090	0.810256	0.000880858	-0.401531	0.118658	0.413459	0.23446	0.000250074	NR1	rs9932117
LPL	8:19752694:C:T	5877	-186560	0.0333333	0.000247456	-0.801433	0.214207	0.255374	0.178703	0.000145551	NR1	rs73667408
LPO	17:57971359:T:G	2715	-267226	0.0589744	0.00212371	-0.580149	0.186032	0.616238	0.300362	0.00028659	NR1	rs8067262
LRIG1	3:66394273:A:C	4466	-106750	0.333333	1.1799e-19	-0.936609	0.0912915	9.999e-05	4.81366e-14	0.000219653	NR1	rs17775391
LRP1	12:57835205:A:G	2147	706721	0.107692	0.00675408	-0.400093	0.145957	0.718528	0.330612	0.000551068	NR1	rs34559644
LRP11	6:149622577:C:A	4746	-241783	0.428205	4.44772e-21	0.650215	0.060413	9.999e-05	1.62127e-15	0.000191951	NR1	rs9322197
LRPAP1	4:3499799:G:C	3319	-32624	0.0717949	7.34208e-07	-0.808877	0.157448	0.00059994	0.00164628	0.000230464	NR1	rs114634328
LRRC25	19:17476032:G:A	3326	-921591	0.0538462	0.00142328	-0.523849	0.161619	0.528047	0.275293	0.000205896	NR1	rs117501055
LRRN1	3:3765908:T:C	5105	-33524	0.351282	9.15773e-26	0.861583	0.0695147	9.999e-05	2.12273e-19	0.000119944	NR1	rs6801789
LSP1	11:1853036:C:T	4670	-49	0.297436	0.0018064	-0.25099	0.0792115	0.758524	0.338849	0.00014241	NR1	rs2089909
LTA	6:31512356:C:T	10267	-59934	0.0871795	1.17767e-13	-1.17913	0.146439	9.999e-05	2.72471e-08	0.000308378	NR1	.
LTBP2	14:74448842:G:A	3549	-163396	0.374359	0.000171397	-0.245187	0.0638488	0.0853915	0.0815586	0.000306235	NR1	rs12587259
LTBP3	11:65575510:A:G	2354	17150	0.212821	0.00116423	-0.312697	0.0947117	0.266073	0.182457	0.000566924	NR1	rs67924081
LTBR	12:6389496:A:G	3511	5333	0.635897	1.04951e-07	-0.336611	0.0606802	0.00019998	0.000243351	0.000185999	NR1	rs10849449
LXN	3:157861680:C:T	3732	-810969	0.133333	0.000679303	-0.453368	0.131056	0.181382	0.146061	0.000588439	NR1	rs16828444
LY6D	8:142806152:G:T	4794	19612	0.612821	5.98899e-11	0.50356	0.072206	9.999e-05	8.00282e-07	0.000268911	NR1	rs11774823
LY75	2:159889274:G:T	3972	-15483	0.376923	1.16378e-28	0.915341	0.0683382	9.999e-05	2.34211e-21	0.000410735	NR1	rs925411
LY9	1:160789262:A:G	3083	-6913	0.225641	1.94912e-14	0.684476	0.0819647	9.999e-05	5.52312e-10	0.000234646	NR1	rs12405457
LY96	8:73773169:G:T	3494	-218224	0.807692	0.000651923	-0.433058	0.124759	0.281672	0.187228	0.000265654	NR1	rs2046180
LYN	8:55253652:G:C	4082	-626184	0.0641026	0.00221254	-0.63171	0.203398	0.60374	0.297404	0.000323899	NR1	rs55744239
LYPD3	19:43455236:G:A	3187	-10373	0.205128	1.24726e-07	0.539278	0.0978417	0.00019998	0.000243351	0.000405308	NR1	rs35681564
LYPD8	1:248799929:T:C	2122	44169	0.0794872	0.000119715	0.672298	0.170861	0.0271973	0.0343919	0.000691121	NR1	.
MAD1L1	7:1773420:A:G	4651	-459526	0.148718	0.00048401	-0.360203	0.101298	0.328567	0.205006	0.000180338	NR1	rs66491680
MANF	3:52025620:C:T	1649	640328	0.146154	0.0267549	0.271601	0.121586	0.89901	0.375017	0.00104127	NR1	rs9873175
MANSC1	12:12061939:G:C	3693	-288304	0.930769	0.00238133	0.456988	0.148239	0.80182	0.348991	0.000156231	NR1	rs2961549
MAP2K6	17:68783610:C:T	3616	-631088	0.105128	0.00127416	-0.534081	0.163099	0.432257	0.243712	0.000273679	NR1	rs7213475
MAP4K5	14:50809846:A:T	3683	277276	0.279487	0.000182535	-0.411295	0.107575	0.114189	0.0989873	0.000275285	NR1	rs34845905
MAPK9	5:179554365:C:T	4273	-737719	0.323077	0.00366433	0.325968	0.110679	0.922208	0.381518	0.000157907	NR1	rs62395249
MARCO	2:118983428:C:T	3475	41233	0.230769	1.32973e-08	-0.493831	0.0828275	9.999e-05	4.98549e-05	0.000331382	NR1	rs6751745
MASP1	3:186361834:G:T	4310	-929904	0.102564	3.32511e-05	-0.689657	0.161895	0.0383962	0.0437745	0.000130265	NR1	rs112936817
MATN2	8:97978993:A:G	2933	109928	0.664103	4.1816e-05	0.375784	0.0894067	0.0260974	0.0323241	0.000266918	NR1	rs1869609
MATN3	2:20020375:T:G	4462	7706	0.384615	4.63435e-10	0.581146	0.088036	9.999e-05	3.29588e-06	0.000203592	NR1	rs1191804
MAVS	20:4509184:A:T	4372	662349	0.123077	0.00091772	0.464658	0.137802	0.532847	0.277488	0.000120743	NR1	rs6139443
MB	22:34627420:C:T	3750	-989910	0.164103	0.0003094	-0.39715	0.107909	0.172283	0.138123	0.00018584	NR1	rs12170683
MCAM	11:120063188:A:T	3567	746057	0.0794872	0.000366518	-0.280124	0.077092	0.193281	0.149605	0.000235074	NR1	rs79255840
MCFD2	2:46947977:G:A	4460	32170	0.779487	1.36982e-06	-0.48643	0.09726	0.00209979	0.00395647	0.000143529	NR1	rs6544941
MDGA1	6:37706563:A:G	4059	8679	0.497436	1.63161e-47	-1.09944	0.0546306	9.999e-05	9.94685e-38	0.000223886	NR1	.
MDK	11:47347892:G:A	2208	966222	0.0794872	0.00108921	-0.444358	0.133787	0.266173	0.180674	0.000546674	NR1	rs11570058
MEGF10	5:127287611:T:A	2959	-3186	0.5	5.55889e-08	0.474791	0.0836348	9.999e-05	0.000122321	0.000315443	NR1	rs6869632
MEGF9	9:120606049:G:A	2655	-108422	0.715385	6.72033e-05	0.35416	0.086726	0.0267973	0.0348448	0.000394426	NR1	rs4837785
MEP1B	18:32217995:T:C	3203	27955	0.469231	6.34631e-40	-1.07273	0.0618696	9.999e-05	1.93377e-31	0.000374242	NR1	rs680321
MEPE	4:88372113:T:C	3844	539143	0.361538	0.00311173	-0.204436	0.0681928	0.743726	0.335531	0.000310139	NR1	rs10016511
MERTK	2:112488434:G:A	2629	589826	0.133333	0.00108941	0.440696	0.132687	0.329567	0.207841	0.00036622	NR1	rs6726169
MESD	15:80784714:G:A	3718	-205106	0.166667	0.00077512	-0.421983	0.123344	0.385461	0.224318	0.00021533	NR1	rs11072942
MET	7:116692143:A:G	2522	19946	0.279487	0.00377894	0.253905	0.0865051	0.546245	0.280785	0.000552872	NR1	rs7798983
METAP1D	2:172486471:G:A	3750	486517	0.151282	0.000147765	-0.456615	0.117701	0.0849915	0.0815586	0.000251295	NR1	rs2701268
METAP2	12:95972600:T:C	5271	498447	0.110256	0.0013863	-0.316451	0.0973929	0.659034	0.313159	0.000182674	NR1	rs3829305
MFAP5	12:7686294:C:T	2894	-976533	0.164103	0.000294784	0.347854	0.0941755	0.116088	0.102306	0.000318539	NR1	rs112948160
MFGE8	15:88918765:T:G	3559	5385	0.307692	1.42914e-07	0.452359	0.0824931	0.00049995	0.000345566	0.000261663	NR1	rs7171119
MGLL	3:128468584:G:C	3601	646068	0.753846	0.0026042	0.288182	0.0943441	0.647035	0.310079	0.000311546	NR1	rs2981011
MGMT	10:129646763:G:A	4777	179521	0.430769	1.51442e-12	-0.598117	0.0785031	9.999e-05	2.48713e-08	0.00014507	NR1	rs12241533
MIA	19:40762338:A:G	3127	-13184	0.0538462	4.23944e-15	1.53522	0.178494	9.999e-05	1.51435e-10	0.000321007	NR1	rs2607412
MICB_MICA	6:31410610:T:C	10284	-87536	0.353846	8.56399e-42	-1.07448	0.0596517	9.999e-05	7.949e-30	0.000335108	NR1	.
MIF	22:23908608:C:G	3624	14224	0.538462	4.46667e-09	-0.300688	0.0487012	9.999e-05	1.96433e-05	0.000247442	NR1	rs2330634
MILR1	17:64468504:G:A	2191	19388	0.0564103	4.02929e-05	0.778858	0.1849	0.0115988	0.0188494	0.000545673	NR1	.
MITD1	2:98761090:T:C	2833	-419969	0.0589744	0.00437046	-0.475222	0.16458	0.570143	0.286454	0.000620184	NR1	rs77908421
MLN	6:33811187:A:G	5499	7183	0.471795	7.82036e-08	-0.447106	0.0797328	0.00019998	0.000321654	0.000237799	NR1	rs9394169
MME	3:155405920:C:T	2941	325600	0.423077	0.00726521	-0.212135	0.0781037	0.786921	0.344189	0.000488436	NR1	rs35424673
MMP1	11:102800966:C:T	4803	2805	0.407692	1.07051e-05	0.309816	0.0683442	0.00829917	0.0137709	0.000259253	NR1	rs534191
MMP10	11:103374204:G:A	4816	593575	0.0487179	0.00011961	0.765378	0.194505	0.0774923	0.0755021	0.0002728	NR1	rs74973608
MMP12	11:102851883:G:A	4812	-23100	0.148718	2.46328e-11	-0.829518	0.116302	9.999e-05	3.06828e-07	0.000263055	NR1	.
MMP3	11:102845590:A:G	4812	1980	0.551282	5.38695e-10	0.397015	0.0603975	9.999e-05	4.60876e-06	0.000290236	NR1	.
MMP7	11:102544270:G:A	4961	13522	0.369231	0.000338441	0.288058	0.0787972	0.179982	0.140136	0.000270474	NR1	rs7946641
MMP8	11:102761648:C:G	4886	36693	0.158974	0.000910184	-0.322174	0.0954776	0.39616	0.225358	0.00029438	NR1	rs11225415
MMP9	20:45997178:A:G	3670	-11731	0.620513	0.000985233	-0.23363	0.0697185	0.39566	0.225358	0.000269325	NR1	rs8114050
MNDA	1:158398299:C:A	4222	-433053	0.110256	0.00303266	-0.422896	0.140677	0.757724	0.338849	0.000254024	NR1	rs56340639
MOG	6:29729740:A:G	8298	72647	0.676923	5.7959e-06	0.37395	0.0799668	0.00489951	0.00936502	0.000612775	NR1	.
MPIG6B	6:31496662:G:A	11967	-226712	0.207692	0.000243739	-0.277894	0.074194	0.266973	0.181338	0.000276594	NR1	.
MPO	17:58288745:T:G	2715	7809	0.179487	6.2987e-05	0.437014	0.106586	0.039796	0.0437808	0.000305198	NR1	rs7215408
MSLN	16:760593:C:A	3306	-142	0.14359	8.5389e-10	0.651158	0.100369	9.999e-05	5.9601e-06	0.000248726	NR1	rs2235503
MSMB	10:46046324:T:C	1531	54	0.507692	4.87949e-28	0.886514	0.0672652	9.999e-05	5.28901e-21	0.000990288	NR1
MSR1	8:16178676:C:A	6206	-13976	0.171795	9.15828e-06	-0.415016	0.0908155	0.0129987	0.0198976	0.000163055	NR1	rs33934232
MSRA	8:9381948:T:G	6102	-672345	0.805128	0.00034992	-0.380061	0.104227	0.273373	0.181726	0.000259437	NR1	rs6601302
MSTN	2:189552720:G:A	2885	-510010	0.905128	0.0071317	0.39536	0.145221	0.776222	0.343023	0.000498947	NR1	rs2043933
MUC13	3:125010258:G:C	4214	75506	0.702564	0.000749007	0.374651	0.109192	0.311769	0.199061	0.000303168	NR1	rs28503954
MVK	12:109740605:G:C	2928	166810	0.0641026	0.00353243	0.395046	0.133595	0.649435	0.311408	0.00039649	NR1	rs1861814
MYOC	1:171645230:T:C	4302	-7459	0.0974359	1.18299e-05	-0.636995	0.141254	0.0059994	0.0124902	0.000363785	NR1	rs7523603
MZB1	5:139439484:T:C	2047	49570	0.635897	6.85045e-06	0.429019	0.0925083	0.00209979	0.00422967	0.000617185	NR1	rs3923059
NAAA	4:75919627:C:T	4855	-21387	0.297436	1.48909e-12	-0.735133	0.0964499	9.999e-05	3.55987e-08	0.000308452	NR1	rs55967764
NADK	1:1905586:C:T	2774	127115	0.441026	4.54531e-07	0.353054	0.0673713	0.00069993	0.00087216	0.000299392	NR1	rs2803290
NBL1	1:18875171:A:G	4588	-769141	0.474359	0.00222981	0.203991	0.0657326	0.786321	0.343989	0.000193628	NR1	rs28481840
NBN	8:88992720:C:T	2680	-991948	0.741026	0.0134397	-0.290137	0.116189	0.839616	0.358328	0.000635419	NR1	rs10098751
NCAM1	11:113179079:C:T	3430	217658	0.625641	0.000465546	0.203539	0.0570645	0.175782	0.140034	0.000328044	NR1	.
NCAM2	21:21463626:A:G	5002	465216	0.397436	2.16448e-11	0.524333	0.073278	9.999e-05	2.52565e-07	0.000178201	NR1	rs2826851
NCAN	19:19757518:A:G	3197	545559	0.107692	0.0058732	-0.311886	0.111836	0.838016	0.358328	0.000349624	NR1	rs11671163
NCF2	1:184168028:A:C	3416	577568	0.292308	0.00385526	0.211478	0.0722105	0.685031	0.320166	0.000376587	NR1	rs59795179
NCR1	19:54901304:C:A	3881	-4845	0.146154	3.58253e-05	-0.482563	0.113772	0.0437956	0.0486856	0.000116003	NR1
NCS1	9:130988383:A:G	3677	815978	0.374359	2.65933e-05	0.318953	0.0739215	0.0232977	0.0300701	0.000143652	NR1	rs12005819
NDRG1	8:133722775:C:T	4888	425522	0.310256	0.00079084	0.372668	0.109115	0.464954	0.257236	0.000149172	NR1	rs1868439
NDUFS6	5:1769842:C:G	5499	-31566	0.453846	0.000173595	0.381002	0.0993042	0.20318	0.154596	0.00011346	NR1	rs6555010
NECTIN2	19:44876079:C:T	3594	29781	0.223077	0.00175444	0.233718	0.0735525	0.623038	0.305612	0.000201415	NR1	rs369599
NECTIN4	1:162071088:C:T	3176	981529	0.0589744	0.000786806	0.453437	0.132706	0.321668	0.202163	0.000274747	NR1	rs16849113
NEFL	8:25064177:A:G	3530	107564	0.341026	0.000164748	0.318911	0.0828205	0.0772923	0.0753143	0.000328211	NR1	rs4872287
NELL1	11:20935979:T:C	4645	266392	0.117949	4.37595e-07	0.719167	0.137023	0.00079992	0.00142824	0.000132514	NR1	rs16907072
NELL2	12:45132577:C:T	2629	256261	0.35641	7.44837e-07	0.361433	0.0703956	0.00039996	0.000747509	0.000616965	NR1	rs2098553
NFASC	1:204976361:C:A	3775	147708	0.141026	3.07799e-07	0.560407	0.105277	0.00089991	0.000774324	0.00019687	NR1	rs6693024
NFATC1	18:79513325:C:T	4640	117394	0.674359	8.02663e-05	0.414199	0.102568	0.0691931	0.0689315	0.000209207	NR1	rs2581726
NID1	1:236620491:G:C	4047	555400	0.141026	4.5096e-05	0.334147	0.0798585	0.0294971	0.0365673	0.000257527	NR1	rs594911
NID2	14:52024937:T:C	4547	-44123	0.7	3.85915e-11	0.45582	0.0646315	9.999e-05	5.40592e-07	0.000215902	NR1	rs1497077
NME3	16:2071000:A:C	3575	299456	0.297436	0.00142194	-0.273147	0.0842642	0.489351	0.263123	0.00029804	NR1	rs13334473
NMNAT1	1:9365253:T:C	2738	-578223	0.0948718	0.00116327	-0.474684	0.143765	0.464854	0.255493	0.000220433	NR1	rs55669630
NOMO1	16:15701191:T:C	1837	867469	0.810256	0.00735402	-0.29529	0.108888	0.789921	0.343989	0.00059703	NR1	rs1180588
NOS1	12:116605535:T:C	3838	-756092	0.0948718	0.00163706	0.526385	0.164559	0.671333	0.317627	0.000159812	NR1	rs7958610
NOS3	7:151869829:C:G	4310	878811	0.45641	0.000163893	0.369318	0.0958765	0.136086	0.113127	0.000162404	NR1	rs13240743
NOTCH1	9:135549643:T:C	3001	-996406	0.253846	0.000492528	-0.246677	0.0694677	0.269573	0.182627	0.000215896	NR1	rs28399074
NOTCH3	19:15815788:A:G	5158	614792	0.45641	0.000394819	0.250187	0.0692471	0.271573	0.182834	0.000174877	NR1	rs7255189
NPDC1	9:137028813:A:G	2718	-17365	0.779487	2.34513e-05	-0.320817	0.073829	0.0144986	0.0209429	0.000279184	NR1	rs4880189
NPPB	1:11772232:C:A	2880	-86714	0.258974	0.00031912	0.370494	0.1009	0.144886	0.119351	0.000251789	NR1	rs61773952
NPPC	2:231320853:A:C	3201	-605544	0.133333	0.000259223	0.401026	0.107549	0.135286	0.114677	0.000292979	NR1	rs75310659
NPTN	15:73926125:A:C	2770	292735	0.4	0.000505219	-0.357356	0.100841	0.176982	0.13922	0.000455435	NR1	rs16958477
NPTX1	17:80776866:G:A	4335	300258	0.0384615	1.4978e-06	1.1263	0.22609	0.0019998	0.00329359	0.000144665	NR1	rs59980856
NPTXR	22:38806012:T:C	2993	-38017	0.110256	1.65553e-05	0.503226	0.113608	0.00849915	0.0151148	0.000337506	NR1	rs56187235
NPY	7:25245612:G:A	4832	961421	0.138462	0.000605732	0.432798	0.123932	0.352565	0.213073	0.000226377	NR1	rs11489352
NRCAM	7:108321010:G:A	3342	-135427	0.271795	6.03652e-07	0.423008	0.0816673	0.00029997	0.000754647	0.000406952	NR1	rs66526866
NRP1	10:33196550:G:T	4368	-138118	0.420513	8.29658e-08	-0.29037	0.0518936	0.00019998	0.000245497	0.000259383	NR1	.
NRP2	2:204896077:C:T	3030	-786425	0.320513	3.14414e-05	0.295349	0.0691088	0.0218978	0.0300701	0.000260364	NR1	rs2161854
NSFL1C	20:1343290:T:C	4355	-123560	0.489744	0.00011965	-0.203484	0.0517123	0.129287	0.108668	0.000102819	NR1	rs6041576
NT5C3A	7:32298944:C:G	4205	-763833	0.817949	0.000473403	-0.375543	0.105427	0.213179	0.157124	0.000328669	NR1	rs215608
NT5E	6:85405564:G:C	4518	-44520	0.123077	1.38525e-08	-0.745417	0.125193	9.999e-05	5.36458e-05	0.000404647	NR1	rs637346
NTF3	12:5162860:A:G	4039	-269249	0.171795	0.000272159	-0.491643	0.132322	0.20428	0.154596	0.000149743	NR1	rs11063542
NTF4	19:49994592:G:A	3565	929773	0.182051	7.70041e-05	0.528962	0.130643	0.0480952	0.0539851	0.000216412	NR1	rs12461843
NTRK2	9:85402625:C:T	3523	732895	0.953846	0.00148433	-0.583118	0.180613	0.49995	0.264997	0.0002837	NR1	rs2592993
NTRK3	15:87582966:C:A	3574	-673774	0.0948718	0.00115184	0.386109	0.116834	0.464354	0.255327	0.000239437	NR1	rs10520661
NUB1	7:151957529:G:A	4192	615716	0.146154	0.00435031	-0.401174	0.138862	0.929507	0.38325	0.000147833	NR1	rs2888800
NUCB2	11:17269663:T:C	3569	-7077	0.641026	1.5261e-23	-0.729144	0.0627261	9.999e-05	1.17842e-17	0.000314886	NR1	.
NUDC	1:26576921:C:T	2321	-344823	0.361538	0.0041618	0.210746	0.0725811	0.591341	0.292967	0.000538967	NR1	rs34774220
NUDT5	10:12207414:G:C	4598	11522	0.117949	7.10083e-05	0.315193	0.07745	0.0825917	0.0802778	0.000130291	NR1	rs10906098
NXPH1	7:7938281:G:T	5500	-495329	0.45641	0.00117713	-0.319699	0.0969291	0.675632	0.317627	0.000124094	NR1	rs6972761
OBP2B	9:133210436:G:A	4458	1185	0.75641	3.40972e-15	0.754877	0.087406	9.999e-05	1.24298e-10	0.000161905	NR1	rs3761822
ODAM	4:70144833:A:C	4512	-50893	0.235897	0.00102568	0.433648	0.129867	0.30227	0.195817	0.00040636	NR1	rs1606688
OGFR	20:63090578:T:A	4740	285742	0.189744	0.000222984	0.369691	0.0980721	0.19798	0.152031	0.00013277	NR1	rs2427488
OGN	9:92268862:T:C	3705	-135717	0.374359	3.06661e-19	0.545969	0.0539928	9.999e-05	7.22357e-14	0.000367104	NR1	rs12353096
OLR1	12:10150936:A:G	4706	-21197	0.3	0.00523467	0.205072	0.0725271	0.870913	0.367326	0.000294486	NR1	rs10845054
OMD	9:91941489:T:C	3716	-482983	0.0538462	0.00554989	0.519879	0.18515	0.825517	0.354324	0.00038509	NR1	rs75076910
OMG	17:31100717:A:G	2845	-196523	0.0641026	0.00469075	0.51904	0.181223	0.732227	0.334774	0.000443799	NR1	rs34494243
OPTC	1:204419052:C:T	3290	924898	0.0692308	0.000573133	0.572711	0.163259	0.289771	0.191425	0.000207444	NR1	rs12059922
OSCAR	19:54073506:G:A	4438	-27298	0.538462	4.25343e-11	0.468076	0.0665332	9.999e-05	4.21394e-07	0.000100954	NR1	.
OSM	22:30426473:C:G	3250	159621	0.274359	0.00256245	0.222832	0.0728284	0.621438	0.302669	0.000404949	NR1	rs2072158
OSMR	5:38883969:T:G	3768	37956	0.102564	1.52532e-07	-0.495924	0.0906609	0.00039996	0.000411099	0.000252968	NR1	rs34675408
OXT	20:3680279:T:C	3871	608658	0.074359	0.000811373	0.576027	0.169026	0.40356	0.232909	0.000196598	NR1	rs4987243
P4HB	17:80864196:A:G	4037	-996340	0.269231	0.00113184	-0.297924	0.090008	0.476452	0.258597	0.000209871	NR1	rs72490481
PAEP	9:135575920:A:C	4080	14163	0.179487	1.6347e-08	0.632715	0.10685	9.999e-05	8.54918e-05	0.000118354	NR1	rs783768
PAG1	8:80407129:C:A	2912	-704940	0.341026	5.51725e-05	0.381652	0.0923287	0.0207979	0.0289599	0.000387012	NR1	rs879696
PAM	5:102902798:G:T	3762	147492	0.307692	9.52628e-07	0.335496	0.0660309	0.00049995	0.00128541	0.000480747	NR1	rs10038600
PAMR1	11:35553947:G:A	4606	28330	0.189744	3.20882e-06	-0.432599	0.0899116	0.00279972	0.00551937	0.000167946	NR1	rs59100957
PARK7	1:7944380:T:C	3444	-17332	0.0512821	0.000297394	0.396488	0.107413	0.179482	0.139925	0.000242213	NR1	rs34878017
PARP1	1:225463277:G:A	4156	-944817	0.192308	8.28212e-05	-0.355506	0.0882094	0.0559944	0.0608579	0.000321809	NR1	rs12405879
PBLD	10:68296578:A:C	3856	-36351	0.846154	5.26912e-06	-0.535757	0.114033	0.00289971	0.00506068	0.000464232	NR1	rs7912806
PCDH1	5:141841444:T:G	3443	-36967	0.858974	0.000349979	-0.48725	0.133624	0.20018	0.152031	0.000193516	NR1	rs2974701
PCDH17	13:57174094:G:A	3221	-457651	0.138462	0.00126721	0.367067	0.112039	0.265373	0.180561	0.000628929	NR1	rs77551950
PCOLCE	7:101525243:G:C	3212	922879	0.212821	0.000104328	0.252769	0.0636597	0.0545945	0.0598968	0.00039078	NR1	rs56025144
PCSK9	1:56036855:A:C	4089	997306	0.430769	0.000988243	0.295535	0.0882156	0.458754	0.254978	0.000226434	NR1	rs6688604
PDCD1	2:241853521:G:C	2907	-5374	0.361538	0.00342412	-0.244356	0.0823545	0.663034	0.313159	0.000405058	NR1	rs7420347
PDCD1LG2	9:5514839:T:C	3844	4307	0.520513	9.92386e-05	0.355115	0.0891443	0.069793	0.0695538	0.000236207	NR1	rs2381282
PDCD5	19:32582525:G:A	4203	1334	0.274359	4.48421e-09	0.4649	0.0753071	9.999e-05	2.4416e-05	0.000261295	NR1	rs4499344
PDCD6	5:199300:G:A	2579	-72347	0.148718	4.40354e-33	-1.42896	0.0957377	9.999e-05	7.13917e-25	0.000412574	NR1	rs28636067
PDGFA	7:251515:G:A	3910	-268332	0.0692308	3.27594e-05	0.341945	0.0802015	0.0337966	0.042121	0.000197983	NR1	rs150865472
PDGFB	22:40134048:T:A	2861	889065	0.269231	0.000586234	-0.148281	0.0423474	0.241376	0.170276	0.000333839	NR1	rs7284587
PDGFC	4:156244068:T:C	4442	-727732	0.782051	0.00226864	-0.376213	0.121439	0.60224	0.297404	0.000314452	NR1	rs13135777
PDGFRA	4:53830322:C:T	3736	-398972	0.228205	0.000187876	0.382657	0.100287	0.0963904	0.0905048	0.000263149	NR1	rs55808507
PDGFRB	5:150128912:C:T	3709	-26934	0.435897	6.50309e-48	1.1089	0.0546909	9.999e-05	1.89135e-38	0.000219688	NR1	rs3816018
PDLIM7	5:176741506:C:A	2865	-756099	0.192308	6.18648e-07	-0.569705	0.110101	0.00069993	0.00121532	0.000274133	NR1	rs729823
PEAR1	1:157361532:G:C	3222	467813	0.407692	0.000315688	-0.268651	0.0731048	0.131587	0.110855	0.000247713	NR1	rs1814051
PEBP1	12:118422932:G:A	4205	286807	0.320513	9.16071e-05	-0.175715	0.0438817	0.0751925	0.0752019	0.000169484	NR1	rs956873
PECAM1	17:63978163:C:G	2126	-412698	0.894872	0.00379627	-0.383116	0.130593	0.551745	0.280785	0.000519444	NR1	rs6504193
PFKFB2	1:207006477:G:A	2477	-46799	0.184615	0.00847406	0.266229	0.0999902	0.918708	0.38105	0.000322815	NR1	rs4844564
PGF	14:74641719:G:T	3073	-313879	0.55641	0.000260676	0.221748	0.0594935	0.111789	0.0989873	0.000305847	NR1	rs8017803
PGLYRP1	19:45186634:C:T	3494	-836420	0.112821	0.00577784	0.335829	0.120183	0.944906	0.387538	0.000189788	NR1	rs10415850
PHOSPHO1	17:49689663:G:A	2969	458875	0.494872	0.0102049	-0.219767	0.0846292	0.983702	0.396377	0.000232324	NR1	rs4794060
PI3	20:45121477:T:C	3616	-53426	0.197436	0.00344286	0.307234	0.103608	0.735326	0.335531	0.000282203	NR1	rs62206433
PIGR	1:206097459:G:T	2308	-849008	0.625641	0.00220574	-0.266199	0.0856844	0.50435	0.266089	0.000401812	NR1
PIK3AP1	10:96609998:C:T	3030	-110517	0.228205	0.00107073	-0.285235	0.0857475	0.355264	0.213611	0.000356509	NR1	rs41317270
PIK3IP1	22:31619176:C:T	3149	326687	0.207692	1.83575e-07	-0.332252	0.0611704	0.00029997	0.00048199	0.00038478	NR1	rs8461
PILRA	7:100334426:C:T	2693	-39062	0.694872	1.94642e-41	0.894897	0.0500405	9.999e-05	7.7882e-32	0.000512448	NR1	rs7384878
PILRB	7:100334426:C:T	2625	-23692	0.694872	8.15244e-53	1.12705	0.0508498	9.999e-05	5.50182e-41	0.000517451	NR1	rs7384878
PKLR	1:154855684:C:T	2304	-445755	0.74359	1.69347e-05	-0.277771	0.0627865	0.0079992	0.0118403	0.000387206	NR1	rs2878412
PLA2G10	16:15083838:T:A	1942	389529	0.679487	0.00700617	-0.251052	0.0920082	0.79572	0.345819	0.000438048	NR1	rs8060236
PLA2G15	16:68256297:G:A	2190	10923	0.0948718	0.00256272	-0.439349	0.143594	0.318968	0.203236	0.000742955	NR1	rs12446418
PLA2G1B	12:119408686:C:T	3585	-919094	0.0435897	0.00298601	-0.560495	0.186142	0.684332	0.320692	0.000306587	NR1	rs113275117
PLA2G2A	1:19979653:G:C	4166	34	0.182051	1.46056e-19	1.06576	0.104214	9.999e-05	2.01944e-14	0.000215723	NR1	rs11573156
PLA2G4A	1:187266766:T:G	3807	437816	0.0974359	0.00279423	0.444422	0.146565	0.618238	0.303695	0.000390218	NR1	rs72641758
PLA2G7	6:46710420:C:T	3704	-24956	0.0717949	0.000449565	-0.558986	0.156288	0.207079	0.156867	0.000272647	NR1	rs13218408
PLAT	8:41219579:T:C	2701	-987987	0.384615	0.00417493	-0.203441	0.0700904	0.663934	0.314263	0.000424553	NR1	rs4736946
PLAU	10:73749515:C:T	1866	-161618	0.651282	0.000362447	-0.265402	0.0729781	0.0359964	0.0415421	0.00142878	NR1	.
PLAUR	19:43826701:A:G	3509	156531	0.0820513	0.0017486	-0.319033	0.100369	0.50085	0.26617	0.000320096	NR1	rs1865108
PLIN1	15:90087660:C:A	4002	408292	0.184615	0.00439403	-0.372303	0.129016	0.814919	0.351317	0.00027237	NR1	.
PLIN3	19:5444508:G:A	3634	576840	0.171795	0.00346424	0.310444	0.104761	0.90311	0.375595	0.000146739	NR1	rs80092969
PLPBP	8:37255488:T:C	2431	-507158	0.14359	0.000820299	0.281687	0.082734	0.253775	0.177525	0.000321217	NR1	rs11775113
PLTP	20:45906012:G:A	3595	-6144	0.187179	6.03805e-07	-0.418727	0.0808417	0.00039996	0.00107273	0.000272446	NR1	rs6065904
PLXDC1	17:38911586:G:A	2333	-240052	0.382051	1.34164e-05	-0.429168	0.095803	0.00759924	0.0112338	0.000385542	NR1	rs653342
PLXNA4	7:132839455:G:A	3340	262984	0.0538462	0.000126647	-0.835295	0.213083	0.0740926	0.0737589	0.000279106	NR1	rs78688534
PLXNB2	22:50697023:G:C	3636	389376	0.107692	1.18479e-05	0.504014	0.111774	0.010199	0.0174187	0.00019364	NR1	rs9616939
PM20D1	1:205845357:G:A	2888	-4776	0.276923	2.13882e-09	-0.737109	0.116727	9.999e-05	1.36127e-05	0.000233018	NR1	rs1104899
PMVK	1:154416192:T:C	2225	-520528	0.825641	0.00761451	-0.336638	0.124689	0.853315	0.36145	0.000412329	NR1	rs4521987
PNLIPRP2	10:116638373:A:G	3118	17419	0.446154	2.04899e-43	1.13791	0.061168	9.999e-05	2.88931e-35	0.000290043	NR1	.
PODXL	7:131186192:A:G	3763	-370437	0.166667	0.000899575	-0.478159	0.14156	0.457554	0.255327	0.000188926	NR1	rs7797846
PODXL2	3:127475176:A:G	3507	-154010	0.284615	0.0016385	-0.268642	0.0839903	0.49605	0.264727	0.000296657	NR1	rs60287709
POLR2F	22:38728907:C:T	3177	775207	0.646154	0.000582594	-0.234549	0.0669505	0.279972	0.18556	0.000241661	NR1	rs2235229
PON3	7:95326216:C:T	3171	-70160	0.405128	1.11325e-05	-0.364189	0.0805028	0.00739926	0.0114174	0.000408606	NR1	rs757158
PPCDC	15:75043832:T:A	2381	20241	0.102564	8.45869e-17	0.991525	0.107415	9.999e-05	8.48751e-12	0.000478606	NR1	rs3816261
PPIB	15:64807629:G:T	2968	644606	0.930769	0.0020259	-0.486179	0.15517	0.437956	0.243857	0.000512286	NR1	rs7179492
PPME1	11:74061728:T:C	3040	-109562	0.135897	0.000890915	-0.323335	0.0956437	0.265573	0.181726	0.000410324	NR1	rs4537786
PPP1R12A	12:80301707:G:A	2637	366609	0.0589744	0.00318313	-0.533553	0.178408	0.476352	0.257236	0.000615453	NR1	rs76651191
PPP1R2	3:195028140:C:T	4575	-515186	0.169231	0.00132632	0.35282	0.108143	0.640236	0.308496	0.000157601	NR1	rs2676872
PPP1R9B	17:50285773:G:A	3059	135095	0.728205	0.000327682	-0.371846	0.10147	0.226977	0.162646	0.000165935	NR1	rs2255865
PPP3R1	2:67732733:C:T	4523	-519800	0.0871795	0.00111436	-0.451322	0.136162	0.506449	0.2685	0.000190689	NR1	rs11885596
PPY	17:44772984:T:C	2823	830507	0.4	0.00146558	-0.309897	0.0958721	0.354965	0.213643	0.000492201	NR1	rs68017435
PRCP	11:81908538:C:T	3958	-991893	0.953846	0.000900641	0.684467	0.202659	0.344566	0.207841	0.000354484	NR1	rs4944367
PRDX1	1:44756680:A:G	2810	-765205	0.123077	0.00264422	0.413336	0.135531	0.411259	0.236408	0.000624139	NR1	rs35932693
PRDX5	11:64850601:C:T	2227	532479	0.748718	0.00698828	0.229543	0.0840982	0.763524	0.340002	0.00051409	NR1	rs1940568
PRDX6	1:173546408:T:C	2749	69072	0.202564	0.00374415	-0.304063	0.103488	0.589541	0.292967	0.000502766	NR1	rs6425244
PRELP	1:203359612:T:C	3285	-116195	0.920513	0.00199321	0.435887	0.138896	0.642436	0.310079	0.000179752	NR1	rs10494841
PRKAB1	12:120392844:T:C	3392	724710	0.902564	0.00869781	0.455919	0.171824	0.968903	0.394084	0.000225779	NR1	rs2464298
PRL	6:21339351:A:G	4278	-957686	0.907692	0.00103114	-0.490316	0.146907	0.505649	0.2685	0.000209617	NR1	rs7744800
PROC	2:126791098:G:A	4528	-627330	0.0974359	0.00297151	-0.281584	0.0934668	0.747325	0.336756	0.000295483	NR1	rs12475670
PROK1	1:109767919:A:G	3841	-683231	0.405128	7.66709e-05	-0.33593	0.082945	0.0577942	0.0613315	0.0001945	NR1	rs7518059
PRSS2	7:142810131:A:C	2470	39160	0.0897436	0.000251203	0.451544	0.12082	0.0780922	0.074764	0.000405071	NR1	.
PRSS27	16:2368178:C:G	3324	-352047	0.220513	0.000291498	0.374463	0.101295	0.131587	0.110855	0.000331833	NR1	rs61204087
PRSS8	16:30432226:T:G	1410	-703502	0.207692	0.00398597	-0.26648	0.0913313	0.388461	0.225358	0.00103093	NR1	rs61598883
PRTG	15:55709576:C:T	4431	-33577	0.679487	3.8801e-09	0.565515	0.0911949	9.999e-05	2.39283e-05	0.000316512	NR1	rs7162371
PRTN3	19:840839:T:C	2767	-161	0.771795	1.3815e-11	0.628261	0.08684	9.999e-05	1.91408e-07	0.000132786	NR1	rs2074638
PSG1	19:41915485:C:T	2449	-964229	0.0512821	0.00030241	0.686128	0.18611	0.0776922	0.0794856	0.000557749	NR1	.
PSIP1	9:14947474:T:C	4818	-563497	0.515385	0.000242376	-0.335632	0.0895728	0.212879	0.157868	0.000162085	NR1	rs3861706
PSMD9	12:122819039:A:G	3377	930248	0.487179	0.00252212	0.180349	0.0588473	0.549745	0.280767	0.000433261	NR1	rs11060180
PSME1	14:24894705:T:C	3850	758510	0.830769	0.00175932	0.277179	0.0872533	0.657534	0.312302	0.000202767	NR1	rs1241598
PSME2	14:24665518:A:T	3860	518907	0.882051	0.00593062	-0.249722	0.0896514	0.950105	0.388692	0.000178827	NR1	rs1957520
PSMG3	7:1771992:G:C	4465	201959	0.553846	0.00241516	0.189362	0.0615144	0.729427	0.334211	0.000220656	NR1	rs10230245
PSPN	19:7339942:C:A	3738	964008	0.0948718	0.000451978	-0.409582	0.114564	0.29547	0.194377	0.000154747	NR1	rs60476970
PTGDS	9:136922428:T:C	2773	-55077	0.448718	3.87017e-07	-0.228352	0.0432922	0.00039996	0.000791255	0.000204732	NR1	rs10781523
PTH1R	3:46896757:A:C	3091	19035	0.694872	0.017656	-0.271623	0.113398	0.951505	0.389237	0.000667417	NR1	rs936184
PTN	7:138125489:T:C	3139	781755	0.0461538	0.00102017	0.701683	0.210036	0.376162	0.219689	0.000326178	NR1	rs76931384
PTPN1	20:51122111:A:G	3492	611727	0.276923	0.00120517	-0.294158	0.0893756	0.480352	0.258409	0.000211872	NR1	rs230011
PTPN6	12:7939412:G:A	3082	988055	0.176923	0.00222165	-0.260879	0.0840328	0.639936	0.308411	0.00023555	NR1	rs145668750
PTPRF	1:43460145:G:T	2947	-70739	0.0461538	0.000643554	-0.682384	0.196377	0.210179	0.156982	0.000371222	NR1	rs114046167
PTPRM	18:8497751:G:T	3894	930434	0.207692	0.000114081	0.412022	0.104379	0.0906909	0.0869373	0.000142111	NR1	rs11081388
PTPRN2	7:158848877:T:C	4159	261053	0.0923077	0.00105753	-0.466546	0.140099	0.466853	0.255493	0.000207624	NR1	rs2657325
PTPRS	19:5299344:A:G	3668	-41469	0.184615	0.000321702	-0.345777	0.0942254	0.225377	0.164737	0.000164401	NR1	rs11668231
PTS	11:112166291:G:T	3240	-60138	0.171795	0.000588084	0.346077	0.0988609	0.185581	0.14681	0.000397489	NR1	rs5744222
PTX3	3:157102424:C:A	3728	-334427	0.105128	0.00187832	0.483615	0.153208	0.424558	0.238307	0.00051792	NR1	rs77357906
PVALB	22:36820438:G:C	3576	3402	0.733333	0.00177469	0.357194	0.112536	0.668733	0.315799	0.0001547	NR1	rs2267362
PVR	19:44644419:T:G	3693	508	0.246154	3.70376e-16	-0.900809	0.100145	9.999e-05	3.60044e-11	0.000197298	NR1	rs10426401
PXN	12:120224174:T:C	3657	-41557	0.792308	1.7622e-07	0.537916	0.0988797	0.00019998	0.000440756	0.000305206	NR1	.
QDPR	4:17525490:A:G	3773	13399	0.246154	9.63319e-06	-0.293437	0.0643781	0.00679932	0.0111086	0.000270034	NR1	rs35216955
QPCT	2:38282177:G:T	4328	937546	0.238462	3.96618e-05	0.31481	0.0746659	0.0342966	0.0427412	0.000207709	NR1	rs12468437
RAB6A	11:73377449:G:A	2712	-383626	0.0512821	0.000510706	0.706595	0.199563	0.176482	0.139695	0.00040648	NR1	rs60576099
RABGAP1L	1:173299682:T:C	3158	-859839	0.602564	0.000782271	0.302061	0.0883598	0.158884	0.12653	0.000710113	NR1	rs4916213
RARRES2	7:150429663:A:G	4001	88033	0.202564	0.00440082	0.175968	0.0609897	0.864814	0.365614	0.000241448	NR1	rs62501473
RASSF2	20:4132783:A:G	4756	-690826	0.68718	0.00127303	0.318803	0.0973487	0.658834	0.313219	0.000125125	NR1	rs1764989
RBKS	2:27856706:C:T	2759	-33682	0.0820513	0.00123789	-0.302633	0.0921749	0.339366	0.207841	0.000423356	NR1	rs56126232
RBP2	3:140463204:T:C	3389	986687	0.405128	0.00397325	-0.263494	0.0902754	0.765423	0.340136	0.000297085	NR1	rs10935384
RBP5	12:7094298:G:A	2899	-34592	0.187179	1.29275e-05	-0.332307	0.0740347	0.00729927	0.0130691	0.000277528	NR1	rs6488561
REG1A	2:79071002:T:C	4520	-49487	0.235897	5.98582e-05	0.327865	0.0797137	0.0492951	0.0531905	0.000181924	NR1	rs17753263
REG1B	2:79088225:T:C	4564	231	0.697436	1.4837e-05	0.375907	0.0843653	0.0115988	0.018294	0.000203756	NR1	rs2073442
REG3A	2:79215033:G:C	4447	55279	0.735897	8.8909e-05	-0.329189	0.0820511	0.0644936	0.0687453	0.000186717	NR1	rs12475432
REG4	1:119802257:T:G	2028	-9204	0.210256	0.00418622	-0.264884	0.091287	0.605239	0.297649	0.000572776	NR1	rs2282402
RELT	11:73404269:A:G	2522	27869	0.0589744	6.05291e-08	0.617038	0.109023	9.999e-05	0.000122321	0.00044436	NR1	rs7114009
REN	1:204153743:A:T	3634	-12595	0.261538	0.000925295	0.327076	0.0970693	0.416558	0.238664	0.000198469	NR1	rs4951312
RET	10:42939990:C:T	4142	-137080	0.553846	5.3197e-08	-0.362652	0.0637814	0.00019998	0.000146918	0.000430014	NR1	rs788267
RETN	19:8524029:G:A	4230	854979	0.128205	1.82079e-05	0.523779	0.118862	0.0181982	0.0247145	0.000146988	NR1	rs138785496
RGMA	15:93031589:C:T	5314	-57623	0.335897	0.00130425	0.263582	0.0806657	0.737526	0.336223	0.00010869	NR1	rs7181095
RGMB	5:98661785:C:T	4007	-111879	0.453846	0.00316521	-0.181286	0.0605812	0.575942	0.287272	0.000514248	NR1	rs2591443
RHOC	1:112260175:C:T	3298	-446953	0.287179	0.000111055	0.347827	0.0879602	0.0617938	0.0644555	0.000252004	NR1	rs7513316
RILP	17:1962221:C:A	4054	312354	0.0794872	0.00026709	0.434766	0.116852	0.207879	0.156267	0.000149018	NR1	rs112658976
RNASE3	14:20920238:C:T	4577	28852	0.107692	0.000846637	-0.485053	0.142851	0.539846	0.278581	0.000124792	NR1	rs12147654
RNASET2	6:167036683:C:T	4870	80132	0.371795	6.14439e-07	0.341111	0.0659044	0.00059994	0.00163434	0.000150775	NR1	rs162293
RNF41	12:55451631:G:T	2166	-770292	0.387179	0.0088525	-0.230423	0.0870441	0.812819	0.351317	0.000526116	NR1	rs7952853
ROBO1	3:80762903:C:T	3213	994904	0.202564	6.83949e-05	0.335406	0.0822238	0.0210979	0.0289599	0.000782447	NR1	rs55772209
ROBO2	3:77281445:C:G	3547	241345	0.0435897	0.00846033	0.570869	0.214361	0.938106	0.385994	0.000334033	NR1	rs974342
ROR1	1:64141300:T:G	3844	367282	0.102564	5.04064e-10	-0.576856	0.0875925	9.999e-05	2.76172e-06	0.000236262	NR1	rs1359295
RRM2	2:9663572:T:C	5075	-459168	0.407692	0.000306082	0.334691	0.0908656	0.258874	0.178703	0.000159245	NR1	rs10209899
RRM2B	8:102986490:C:G	3726	747528	0.471795	0.00329806	-0.323685	0.108647	0.853715	0.361358	0.000194142	NR1	rs575524
RSPO1	1:37544462:A:G	3394	-90431	0.0923077	2.55036e-07	0.74364	0.138667	9.999e-05	0.000561268	0.000232848	NR1	rs71640737
RSPO3	6:127547902:A:G	2424	429230	0.0487179	0.00585575	-0.406466	0.145698	0.670633	0.317469	0.000545739	NR1	.
RTBDN	19:12885926:A:G	2544	51346	0.246154	0.003459	-0.275848	0.0930706	0.70023	0.325421	0.000354808	NR1	rs2072597
RTN4R	22:20962269:C:A	3494	693950	0.130769	0.000169139	-0.401268	0.104398	0.10399	0.0937988	0.000220932	NR1	rs61588756
RUVBL1	3:127444548:T:G	3460	-679265	0.494872	0.000872091	0.343732	0.10149	0.312969	0.198713	0.000309288	NR1	rs4974427
RWDD1	6:117094336:C:A	3595	522831	0.074359	0.00238447	0.341028	0.110639	0.569143	0.28638	0.000405394	NR1	rs1567252
S100A11	1:152158624:G:A	2790	121619	0.0538462	0.0226261	0.413715	0.179882	0.972103	0.394412	0.00059133	NR1	rs79144663
S100A12	1:153611510:G:C	3153	235888	0.402564	0.00230816	0.294262	0.095152	0.443456	0.246904	0.000552692	NR1	rs9699949
S100A16	1:153197820:G:T	3220	-415318	0.220513	0.00014004	-0.452361	0.11618	0.0417958	0.0513501	0.000499396	NR1	rs12140240
S100A4	1:153547505:C:G	3204	1698	0.0794872	6.62477e-10	0.895685	0.137061	9.999e-05	3.58821e-06	0.000432304	NR1	.
S100P	4:6707618:T:C	5406	13739	0.074359	1.33723e-06	-0.889333	0.177631	0.00349965	0.00479492	8.28766e-05	NR1	rs4689523
SAMD9L	7:93317144:A:G	2099	168758	0.0794872	0.00410108	-0.529973	0.182221	0.651435	0.312327	0.000358215	NR1	rs9784907
SCAMP3	1:154615341:A:G	2284	-647020	0.148718	0.00524587	0.297797	0.105347	0.767923	0.340729	0.000412548	NR1	rs9427103
SCARA5	8:27922028:C:T	4117	-70646	0.733333	2.58616e-06	0.369925	0.0761161	0.00239976	0.00416524	0.000227259	NR1	rs10103504
SCARB2	4:76151444:T:C	4705	-62381	0.125641	1.48271e-07	-0.530103	0.0968052	0.00039996	0.000433759	0.000289661	NR1	rs10008834
SCARF1	17:1638896:G:A	4054	-6837	0.658974	4.01239e-19	-0.631851	0.0627444	9.999e-05	5.99644e-14	0.000169145	NR1	rs2272011
SCARF2	22:20410305:T:G	3195	-27521	0.787179	4.62558e-07	0.334877	0.0639483	0.00029997	0.000943744	0.000221673	NR1	rs1013634
SCG2	2:223497348:G:A	4465	-105014	0.433333	0.000614867	0.271232	0.0777631	0.259274	0.179585	0.000249057	NR1	rs10196910
SCG3	15:51424510:G:A	3473	-256994	0.264103	9.83742e-16	-0.680445	0.0769919	9.999e-05	6.10783e-11	0.000465435	NR1	rs2459401
SCGB1A1	11:62308754:G:A	2978	-110280	0.633333	5.91291e-05	0.416922	0.10129	0.0289971	0.0373563	0.000397622	NR1	.
SCGB3A2	5:147270975:A:G	3406	-607737	0.271795	0.0010497	-0.313559	0.0940961	0.325867	0.205006	0.000308767	NR1	rs6866487
SCGN	6:24704310:T:C	4875	-947906	0.710256	3.07461e-05	0.436711	0.102055	0.0268973	0.0327198	0.00025269	NR1	rs1053598
SCLY	2:238099165:A:G	4369	38163	0.620513	0.000117289	0.277973	0.0705493	0.0834917	0.0815586	0.000214933	NR1	rs1054640
SDC1	2:20170187:C:G	4547	-54944	0.530769	0.000360143	0.310531	0.0853461	0.242776	0.171442	0.000210353	NR1	rs907872
SDC4	20:45342902:C:T	3465	-5523	0.476923	0.00219378	-0.177312	0.0570423	0.59944	0.297404	0.000272664	NR1	rs2251258
SELE	1:169093769:A:G	4961	-640311	0.474359	0.000470745	0.271171	0.0760923	0.20328	0.155141	0.000365722	NR1	rs12021894
SELP	1:169557863:T:C	5091	-72262	0.0641026	7.35775e-08	-0.644751	0.114724	9.999e-05	0.000230855	0.000321256	NR1	rs9332575
SELPLG	12:108574117:G:A	4210	-59778	0.0794872	0.000119488	-0.661423	0.168075	0.0667933	0.0720204	0.000282995	NR1	rs112632298
SEMA3F	3:50690465:G:A	2056	535140	0.0717949	0.000359396	-0.475576	0.130686	0.0562944	0.0608579	0.00120074	NR1	rs55748593
SEMA4C	2:97131943:T:C	1192	261862	0.184615	0.00783369	-0.344416	0.128037	0.461954	0.254978	0.00142801	NR1	rs13390019
SEMA4D	9:89801016:A:G	4480	302902	0.487179	9.84606e-05	-0.329701	0.0827224	0.0708929	0.0711996	0.000205146	NR1	.
SEMA7A	15:73898976:T:C	2568	-534983	0.0692308	0.000410552	-0.501388	0.139195	0.150285	0.122207	0.000467114	NR1	rs148082134
SERPINA11	14:94456095:T:C	4998	3294	0.358974	3.13056e-09	-0.514498	0.0824217	9.999e-05	2.21603e-05	0.000122657	NR1	rs2093235
SERPINA12	14:94527267:C:T	5063	17797	0.261538	3.15593e-10	0.636139	0.0953434	9.999e-05	2.95254e-06	0.000120508	NR1	rs12434602
SERPINA9	14:94462135:T:C	5023	-14063	0.828205	5.1075e-06	-0.594446	0.126332	0.00749925	0.0107772	0.000129889	NR1	rs7152610
SERPINB1	6:2835597:A:G	4414	-6267	0.674359	1.84284e-07	0.373048	0.0686914	0.00029997	0.000465449	0.000197675	NR1	rs2293772
SERPINB6	6:3701443:A:G	4351	729875	0.133333	2.80904e-05	-0.393362	0.0914508	0.0251975	0.0330424	0.000181095	NR1	rs73722528
SERPINB8	18:63839546:G:T	4103	-130536	0.279487	5.61811e-05	-0.412405	0.099879	0.0327967	0.0384402	0.000290893	NR1	rs55831713
SERPINB9	6:2884804:T:C	4397	-18506	0.264103	0.00130502	0.33189	0.101576	0.576642	0.287389	0.000178973	NR1	rs6907075
SERPINE1	7:100927526:C:T	3750	-199579	0.4	0.00116868	0.201737	0.0611243	0.453955	0.252974	0.000269286	NR1	rs2082731
SETMAR	3:4336310:G:C	4751	32940	0.266667	2.40916e-05	-0.354939	0.0818049	0.0271973	0.0363621	0.000149496	NR1	rs60322321
SEZ6L	22:26354390:C:T	3804	184927	0.184615	6.18333e-05	0.379593	0.0924753	0.0585941	0.0608842	0.000138673	NR1	rs9620603
SEZ6L2	16:29139464:G:A	1483	-760087	0.576923	0.0041585	-0.20664	0.0711609	0.461054	0.255327	0.000766977	NR1	rs1646119
SF3B4	1:150585817:T:A	1178	658013	0.141026	4.71868e-05	0.616684	0.147783	0.00449955	0.00808991	0.00141979	NR1	rs112175941
SFRP1	8:41138322:G:A	4172	-171152	0.161538	0.00396855	-0.353569	0.12112	0.822818	0.352931	0.000269745	NR1	rs72639796
SFTPA2	10:79610769:C:A	4334	50361	0.192308	3.81274e-12	0.815273	0.10929	9.999e-05	6.17735e-08	0.000221169	NR1	rs4253509
SFTPD	10:79946568:A:G	4670	-2538	0.410256	6.13131e-18	-0.76148	0.0789498	9.999e-05	1.00807e-12	0.00018724	NR1	rs721917
SHMT1	17:18360257:C:A	2126	-3294	0.328205	2.96945e-10	0.381375	0.0570641	9.999e-05	1.62713e-06	0.000550986	NR1	rs8067462
SIAE	11:124688113:A:G	4507	14373	0.246154	0.0052537	0.264852	0.0937095	0.894511	0.374699	0.000276277	NR1	rs483946
SIGLEC1	20:3701479:C:T	4034	-11122	0.0769231	0.000808357	-0.458399	0.134467	0.465353	0.255862	0.000168125	NR1	rs34924243
SIGLEC10	19:51413952:A:C	4723	-3691	0.164103	2.08941e-05	-0.463713	0.10603	0.0266973	0.0330552	0.000110549	NR1	rs60595035
SIGLEC15	18:46319536:A:G	3778	493860	0.889744	0.00489047	-0.456322	0.1601	0.907409	0.376764	0.000196592	NR1	rs9947826
SIGLEC5	19:51627384:T:A	4889	-3018	0.0923077	9.71631e-15	-1.17185	0.138429	9.999e-05	3.59309e-10	0.00011422	NR1	rs1106476
SIGLEC6	19:51523346:T:G	4688	-8325	0.648718	1.99444e-06	-0.449663	0.0914297	0.00279972	0.00509604	0.000114505	NR1	rs10410468
SIGLEC7	19:51092326:G:A	4468	-49976	0.205128	0.00125943	-0.315034	0.0961034	0.692231	0.323078	0.000117921	NR1	.
SIGLEC9	19:51125272:A:G	4437	365	0.558974	7.7203e-14	-0.716576	0.0882205	9.999e-05	2.19938e-09	0.000120278	NR1	rs2075803
SIRPA	20:1914887:T:C	4468	19479	0.307692	2.64931e-59	-1.07617	0.0434138	9.999e-05	1.53333e-47	0.000134505	NR1	.
SIRPB1	20:1535724:C:A	4592	-84286	0.112821	1.13779e-24	-1.099	0.0914646	9.999e-05	5.82858e-19	0.000112284	NR1	rs111733089
SIRT2	19:38458323:C:G	3873	-441296	0.166667	3.76134e-05	-0.356597	0.0843138	0.0283972	0.0339181	0.000257667	NR1	rs2071086
SKAP1	17:49404181:G:A	3353	973966	0.151282	0.00184973	-0.356911	0.1129	0.478952	0.257236	0.000452687	NR1	rs6917
SKAP2	7:26582875:C:A	3732	-281716	0.638462	0.0016126	0.258032	0.0805505	0.531847	0.275472	0.000360305	NR1	rs740191
SLAMF1	1:160812941:C:T	3025	165896	0.289744	0.000113654	0.47695	0.120797	0.0662934	0.0687453	0.000261554	NR1	rs506263
SLAMF6	1:160268833:C:T	3187	-254423	0.566667	0.000459483	0.342546	0.0959375	0.226177	0.165141	0.000209055	NR1	rs7543429
SLAMF7	1:160740367:G:A	3056	1119	0.282051	2.60267e-12	-0.690898	0.0918043	9.999e-05	3.19313e-08	0.000235167	NR1	rs2295616
SLAMF8	1:160699964:G:A	3340	873090	0.864103	0.000969805	0.423683	0.126258	0.384662	0.224961	0.000236102	NR1	rs500836
SLC39A14	8:22911541:T:C	3828	544262	0.271795	0.00129238	0.350601	0.107207	0.583842	0.290756	0.000170211	NR1	.
SLC39A5	12:57044874:T:G	2165	814822	0.176923	0.00391328	-0.293098	0.100247	0.553145	0.280785	0.000539723	NR1	rs4759272
SLIT2	4:19827565:T:C	4981	-424341	0.353846	4.07808e-05	-0.479688	0.113959	0.0306969	0.0384402	0.000260588	NR1	rs11941461
SLITRK6	13:85937893:C:T	5539	138473	0.112821	0.00107699	-0.470374	0.141478	0.375362	0.219982	0.000368131	NR1	rs75719153
SMAD5	5:135133904:G:A	3632	-998942	0.269231	0.00353519	0.314058	0.106215	0.758424	0.338849	0.00028623	NR1	rs2193941
SMOC1	14:70185040:C:T	4109	305623	0.246154	0.000742347	-0.268525	0.0782023	0.362864	0.214712	0.000256875	NR1	rs8019600
SMOC2	6:168424579:C:T	5568	-16606	0.279487	1.60599e-09	-0.45693	0.0717427	9.999e-05	1.58553e-05	0.000147284	NR1	rs4708467
SMPD1	11:6394233:G:A	5377	3758	0.187179	8.29219e-07	-0.625615	0.122404	0.00069993	0.00186748	0.000164854	NR1	rs1050239
SMPDL3A	6:122800327:A:G	3992	11068	0.174359	1.39349e-23	-1.19543	0.102718	9.999e-05	2.34636e-17	0.00032298	NR1	rs13216278
SNAP23	15:42072439:G:T	2603	-423196	0.0820513	0.000117197	-0.63715	0.161699	0.0429957	0.0478544	0.000506717	NR1	rs55912424
SNAP29	22:21002535:G:A	2867	143527	0.225641	0.000165853	0.352066	0.0914729	0.0840916	0.0815586	0.00032458	NR1	rs28372939
SNCG	10:86966227:A:G	3200	7627	0.771795	7.08409e-36	0.944545	0.059396	9.999e-05	9.05359e-28	0.0003382	NR1	rs1240390
SNX9	6:157555295:C:T	4274	-267952	0.210256	0.000647188	-0.257101	0.0740232	0.329767	0.205096	0.000241374	NR1	rs35943585
SOD1	21:32054856:G:T	3852	395162	0.305128	0.000711336	0.163832	0.0475418	0.354865	0.214712	0.000247609	NR1	rs4816415
SOD2	6:159094238:G:T	4495	-599004	0.402564	0.000223977	0.281649	0.0747398	0.133787	0.112561	0.000263695	NR1	rs575998
SORCS2	4:7218206:T:G	5669	25667	0.6	2.3815e-06	-0.371071	0.0760624	0.0039996	0.00733769	9.86648e-05	NR1	rs4234798
SORD	15:45744854:G:T	2364	721658	0.123077	0.000537815	0.369252	0.104721	0.141186	0.117571	0.000505312	NR1	rs28373591
SORT1	1:109275684:G:T	2969	-122235	0.817949	7.09297e-05	-0.435107	0.106908	0.0375962	0.0446058	0.000289433	NR1	rs629301
SOST	17:44233851:G:T	2568	475059	0.125641	0.0067358	0.321135	0.117113	0.783222	0.343989	0.000475286	NR1	rs55805524
SPARC	5:151812551:T:C	4816	125635	0.0512821	0.00496114	0.408886	0.143698	0.868913	0.367326	0.000233067	NR1	rs56144037
SPARCL1	4:87507544:G:A	4045	-21833	0.392308	4.26208e-25	0.509272	0.0418698	9.999e-05	1.98223e-18	0.000342214	NR1	rs6812158
SPINK1	5:147397435:T:C	3410	-434237	0.151282	7.24199e-05	0.425322	0.10464	0.0311969	0.0377861	0.000355783	NR1	rs6877045
SPINK4	9:33237767:T:G	4058	-2401	0.210256	1.22898e-25	1.10161	0.0891988	9.999e-05	5.37754e-19	0.000300557	NR1	rs496752
SPINK5	5:148131899:A:G	3532	67918	0.6	1.35354e-09	0.423464	0.0661533	9.999e-05	5.9601e-06	0.000269775	NR1	rs2400477
SPINK6	5:148186251:T:G	3607	-16792	0.587179	0.000159905	-0.354752	0.0919391	0.0694931	0.0698309	0.000288737	NR1	rs6868569
SPINT1	15:40902226:G:A	3022	58177	0.0897436	2.55103e-06	-0.584553	0.120202	0.00189981	0.00267399	0.000426112	NR1	rs62020568
SPINT2	19:38559208:G:C	3352	294634	0.146154	0.00120938	0.341013	0.103645	0.373363	0.219689	0.000357034	NR1	rs12974674
SPOCK1	5:137075484:C:T	2956	-423843	0.882051	0.00418807	-0.375755	0.129503	0.636436	0.306766	0.0005854	NR1	rs4976401
SPON1	11:14045253:T:G	3792	82529	0.351282	6.05448e-07	-0.353233	0.0682048	0.00069993	0.00106406	0.000355997	NR1	rs4757219
SPON2	4:1497757:T:A	3672	325173	0.487179	0.00145948	-0.232407	0.071871	0.50175	0.265977	0.000331893	NR1	rs62286824
SPP1	4:88306586:T:A	3915	330871	0.133333	0.0014885	0.410473	0.127172	0.50455	0.267585	0.000316155	NR1	rs72661678
SPRY2	13:81182292:A:C	3487	841165	0.107692	0.00237231	0.519194	0.168353	0.537446	0.277488	0.000410129	NR1	rs1333420
SRP14	15:40010772:C:G	3289	-28410	0.328205	0.000605607	-0.31974	0.0915567	0.250475	0.175218	0.000327412	NR1	rs2412463
SSC4D	7:75698109:A:G	3000	-711589	0.0538462	0.000148519	0.596963	0.153931	0.0731927	0.074764	0.0003518	NR1	.
SSC5D	19:55491724:G:T	4263	3287	0.138462	8.7566e-09	0.579103	0.0958166	9.999e-05	5.63993e-05	0.000117965	NR1	rs66794933
ST3GAL1	8:134274746:G:A	4938	702858	0.271795	0.00202185	-0.337085	0.107564	0.748725	0.336756	0.000160752	NR1	rs9297881
ST6GAL1	3:186973817:C:T	4092	43290	0.128205	0.00315451	-0.330005	0.110239	0.89651	0.374382	0.000155878	NR1	rs6444190
STAMBP	2:73902262:T:C	2394	73300	0.271795	0.00165248	-0.226215	0.0707829	0.324968	0.201901	0.000577217	NR1	rs7586415
STAT5B	17:42910589:C:T	2486	634197	0.194872	0.0470322	0.193282	0.0966386	0.9987	0.399864	0.000622346	NR1	rs56011240
STC1	8:22915121:C:T	4139	-939686	0.5	0.00815746	-0.227487	0.0850144	0.979402	0.396099	0.000208644	NR1	rs11786325
STC2	5:173716107:A:G	4526	387692	0.241026	0.00841764	-0.26884	0.100883	0.9966	0.399343	0.000132498	NR1	rs7733456
STIP1	11:63396124:A:C	2282	-790048	0.730769	0.0051808	0.225765	0.0797478	0.657434	0.313159	0.000518139	NR1	.
STK11	19:402556:C:G	3281	-803223	0.425641	0.000311181	-0.352557	0.0958342	0.258274	0.178286	0.000136467	NR1	rs2012035
STX4	16:31568951:C:T	1489	535392	0.44359	0.00287403	0.240812	0.0796518	0.340866	0.208818	0.000924239	NR1	rs4889673
STX8	17:10310388:C:T	3915	734567	0.0948718	0.00108817	-0.524496	0.157902	0.576542	0.28818	0.000130946	NR1	rs61503459
SULT1A1	16:27953799:T:A	2101	-656246	0.148718	0.000789088	0.492847	0.144275	0.20028	0.152031	0.000410683	NR1	rs11641071
SULT2A1	19:47669105:C:A	3715	-217211	0.425641	0.000724806	-0.294892	0.0857084	0.358164	0.214712	0.000208993	NR1	rs9749100
SUMF2	7:56001287:C:T	3763	-63000	0.502564	0.0041553	0.248315	0.085505	0.714429	0.329009	0.000411162	NR1	rs13245637
SUSD1	9:112154922:T:C	4287	-20376	0.384615	0.000412664	0.390168	0.108361	0.217578	0.159691	0.000246354	NR1	rs2900537
SUSD2	22:24181153:G:C	3566	-335	0.120513	2.99894e-07	0.551129	0.103427	0.00039996	0.000611264	0.000225607	NR1	rs12484381
TACSTD2	1:58575905:A:G	3872	-1348	0.310256	2.43728e-15	-0.737956	0.0849102	9.999e-05	8.7357e-11	0.000246687	NR1	rs3551
TAFA5	22:47918310:C:T	6812	-571244	0.115385	0.000680293	-0.378862	0.109532	0.622438	0.303774	8.53123e-05	NR1	rs8136665
TARBP2	12:52558617:G:T	3304	-942667	0.0769231	0.0010448	-0.613042	0.183892	0.390361	0.225358	0.0002722	NR1	rs11614689
TBC1D17	19:49895682:A:G	3236	17979	0.458974	9.8973e-05	0.346392	0.0869394	0.0777922	0.074713	0.000156285	NR1	rs1290751
TBC1D5	3:18209017:C:A	2898	466385	0.276923	0.0145158	-0.279206	0.113099	0.958004	0.390619	0.000406236	NR1	rs7618405
TBCB	19:35201500:C:T	3330	-913969	0.407692	0.0034614	-0.198469	0.0669681	0.705029	0.327466	0.000325089	NR1	rs916694
TBCC	6:43731060:C:A	2699	984956	0.751282	0.000239069	-0.325022	0.0866552	0.113589	0.0991178	0.000304432	NR1	rs1591301
TCL1A	14:96711265:C:T	5031	997139	0.133333	0.00503262	-0.4107	0.144578	0.978702	0.396099	0.000125319	NR1	rs58248099
TCN2	22:30624354:G:T	3126	17179	0.130769	1.42466e-10	-0.810981	0.118957	9.999e-05	1.43153e-06	0.00044148	NR1	rs12485165
TDGF1	3:46575847:G:A	3431	-1942	0.261538	3.32919e-24	1.02217	0.0862311	9.999e-05	1.17842e-17	0.000454902	NR1	rs3806701
TEK	9:27201553:T:G	4283	92327	0.0564103	3.42127e-06	0.792885	0.165293	0.00409959	0.00729364	0.000247473	NR1	rs117982767
TFF1	21:42415746:A:C	5845	49210	0.228205	0.000145695	-0.380182	0.0979048	0.185381	0.147444	0.000106263	NR1	rs11700858
TFF2	21:41739855:C:T	5785	-611140	0.489744	0.000531879	-0.262962	0.0745099	0.49515	0.26362	9.92595e-05	NR1	rs3171532
TFF3	21:42103462:G:A	5767	-211948	0.0769231	0.000661751	0.406517	0.117258	0.545045	0.280767	9.99887e-05	NR1	rs111297491
TFPI	2:187428664:C:T	3136	-125772	0.338462	1.96099e-09	0.329746	0.0520823	9.999e-05	9.09154e-06	0.000718652	NR1	rs11894589
TFPI2	7:93229958:C:T	2682	-660796	0.0794872	0.0016552	-0.51295	0.160528	0.425757	0.242863	0.000353628	NR1	rs77980597
TFRC	3:196066034:A:C	3674	-16057	0.582051	1.14109e-13	-0.597184	0.0741174	9.999e-05	4.39776e-09	0.000198227	NR1	rs9852883
TGFA	2:70811433:C:T	4087	257606	0.325641	0.000336158	0.30539	0.0834956	0.181682	0.139794	0.00025588	NR1	.
TGFB1	19:41341955:G:A	2740	-11968	0.0717949	3.10848e-07	-0.816104	0.153371	0.00049995	0.000566006	0.000314879	NR1	rs1800472
TGFBI	5:136073435:G:A	3598	44446	0.484615	6.89361e-18	-0.431335	0.044806	9.999e-05	9.39235e-13	0.000292057	NR1	rs12521108
TGFBR2	3:31220086:G:A	4252	613484	0.151282	0.00119535	-0.226672	0.0688198	0.485851	0.261156	0.000246756	NR1	rs11129441
TGFBR3	1:91521477:C:T	3483	-364675	0.458974	0.00644762	0.19092	0.0692479	0.854115	0.361823	0.0003767	NR1	rs6688261
TGM2	20:38890258:G:A	3164	724987	0.264103	0.00404184	0.289694	0.0994425	0.767723	0.341512	0.000302621	NR1	rs6028180
THBD	20:22321658:A:G	4439	-728015	0.348718	0.000985207	0.222222	0.0663141	0.364464	0.216711	0.000300879	NR1	rs2424430
THBS2	6:169224606:C:A	5349	-29241	0.105128	1.22194e-12	0.971527	0.1269	9.999e-05	3.01082e-08	0.00018075	NR1	rs78109196
THBS4	5:80923143:T:A	4101	887794	0.884615	0.00118846	0.334818	0.101601	0.49755	0.264063	0.000253408	NR1	rs491622
THOP1	19:2756185:G:T	3494	-29319	0.266667	3.58314e-07	0.375837	0.071033	0.00049995	0.00088487	0.000138456	NR1	rs8101456
THPO	3:185271645:A:C	3896	893437	0.64359	0.00326577	0.253137	0.0848772	0.826417	0.353124	0.000224448	NR1	rs9843440
THY1	11:119370410:A:G	3593	-52763	0.930769	2.54313e-05	-0.504908	0.116724	0.0174983	0.0246148	0.000237829	NR1	rs514808
TIE1	1:43005511:T:G	3179	-295472	0.407692	0.00012044	0.328366	0.0834856	0.0480952	0.0520638	0.000450091	NR1	rs9326132
TIMD4	5:155975562:G:T	4006	-987665	0.546154	0.00144274	-0.222267	0.0686612	0.476552	0.257236	0.000308979	NR1	rs13179859
TIMP3	22:32763106:A:G	4188	-38600	0.738462	4.02536e-15	-0.624672	0.0725568	9.999e-05	2.55853e-10	0.000165669	NR1	rs4821097
TIMP4	3:12106893:G:A	3826	-52020	0.102564	0.00188916	-0.471084	0.149323	0.635636	0.307583	0.000248727	NR1	rs17035806
TINAGL1	1:30879142:A:G	2743	-697374	0.0871795	0.0197078	-0.320058	0.135999	0.984802	0.39674	0.000405994	NR1	rs12757790
TJAP1	6:43980716:A:T	2735	503145	0.0487179	0.00591554	-0.542746	0.194788	0.924608	0.382588	0.000206248	NR1	rs2051074
TLR3	4:186082920:C:T	4931	13763	0.284615	3.36616e-31	-1.07175	0.0750947	9.999e-05	1.42686e-24	0.000110959	NR1	rs3775291
TMPRSS15	21:18965072:A:G	4397	561286	0.0871795	0.000364341	0.487945	0.134225	0.215478	0.158227	0.000194183	NR1	rs76202660
TMPRSS5	11:113681890:C:G	3880	-24419	0.669231	1.67931e-21	0.814856	0.074679	9.999e-05	4.66979e-16	0.000243458	NR1	rs1533053
TMSB10	2:85258128:G:A	3058	352471	0.0692308	0.000238464	-0.359579	0.095851	0.106489	0.0964635	0.000305573	NR1	rs80322989
TNC	9:115221719:C:T	4408	103561	0.679487	0.000873829	-0.288923	0.0853215	0.443656	0.248604	0.000204399	NR1	rs10759762
TNF	6:31585417:G:A	10267	9851	0.0871795	0.00146348	-0.50528	0.156296	0.70343	0.324797	0.000291643	NR1	.
TNFRSF10A	8:23225458:G:T	3929	355	0.54359	1.31022e-11	-0.548891	0.0757716	9.999e-05	1.96898e-07	0.000207532	NR1	rs13278062
TNFRSF10B	8:23027818:A:T	4130	-41214	0.35641	1.69055e-05	0.299807	0.0677611	0.0163984	0.0233982	0.000175794	NR1	rs2293400
TNFRSF10C	8:23087574:A:G	4075	-15348	0.802564	2.97269e-05	0.426999	0.0995925	0.0263974	0.0348448	0.000188722	NR1	rs6983885
TNFRSF11A	18:62367416:G:A	4030	42105	0.317949	1.45719e-09	-0.423227	0.0662601	9.999e-05	1.0876e-05	0.000190106	NR1	rs56051253
TNFRSF11B	8:119143352:C:T	3720	191466	0.574359	0.00212197	0.243939	0.0782156	0.570643	0.286454	0.000286524	NR1	rs13257113
TNFRSF12A	16:2380175:A:G	2568	-640194	0.528205	0.00017354	-0.31804	0.0828918	0.0849915	0.0807949	0.000297748	NR1	rs6600193
TNFRSF13B	17:16188380:A:G	2690	-783739	0.648718	0.00138237	0.279269	0.085927	0.357164	0.214712	0.00043718	NR1	rs178818
TNFRSF13C	22:41930162:T:C	3190	3355	0.0717949	8.71812e-12	-1.19557	0.163429	9.999e-05	1.41212e-07	0.000499434	NR1	rs144886236
TNFRSF14	1:3330469:G:A	3164	774097	0.0974359	0.0079482	-0.175605	0.0654043	0.967503	0.393868	0.000217501	NR1	rs10909931
TNFRSF19	13:23602414:C:T	6333	32001	0.328205	1.0053e-05	-0.237988	0.0523281	0.0138986	0.0206413	0.000118983	NR1	rs9553014
TNFRSF1A	12:6462882:A:G	3541	120805	0.592308	0.000306644	-0.154405	0.0419253	0.171183	0.138507	0.000185806	NR1	rs1045452
TNFRSF1B	1:12182401:T:C	2549	15409	0.212821	7.6938e-05	-0.218772	0.0540292	0.040096	0.0442767	0.000276216	NR1	.
TNFRSF21	6:47168389:G:A	3751	-141517	0.597436	0.005066	-0.182706	0.0643675	0.823118	0.352931	0.000308524	NR1	rs11754478
TNFRSF4	1:899373:G:C	1934	-314781	0.0948718	0.00267146	0.414741	0.136136	0.461654	0.255327	0.000502788	NR1	rs4411088
TNFRSF6B	20:63771507:G:A	3643	74854	0.566667	1.30804e-05	-0.371072	0.0827228	0.0117988	0.019163	0.00017754	NR1	rs6089986
TNFRSF8	1:12623415:T:C	2594	560111	0.117949	0.000742559	-0.405761	0.118172	0.272573	0.182834	0.000282977	NR1	rs3000893
TNFRSF9	1:7429521:A:T	3443	-511319	0.366667	0.00187592	0.235414	0.0745695	0.631437	0.305704	0.00025667	NR1	rs11120924
TNFSF10	3:172345543:C:T	3570	-177888	0.120513	0.00222284	0.454444	0.146391	0.680532	0.318402	0.00022559	NR1	rs12185914
TNFSF11	13:42130533:G:A	3837	-443620	0.353846	0.00047515	-0.352027	0.0988539	0.235576	0.168767	0.000269943	NR1	rs9285148
TNFSF12	17:6723879:T:C	3286	-825180	0.269231	0.000264634	0.30917	0.0830399	0.163184	0.134009	0.000216525	NR1	rs614067
TNFSF13	17:6710508:T:C	3276	-848243	0.123077	0.000483607	-0.3564	0.100222	0.270473	0.184464	0.00021926	NR1	rs16956197
TNFSF13B	13:108451891:G:C	4709	182172	0.248718	0.000135919	0.313339	0.0803128	0.118688	0.103092	0.000138594	NR1	rs9514850
TNFSF14	19:6665009:T:C	3952	-5152	0.930769	3.31778e-10	0.829241	0.124457	9.999e-05	2.65903e-06	0.000164659	NR1	rs344560
TNR	1:175616367:T:C	3588	-127229	0.241026	2.94934e-05	-0.43066	0.100401	0.0136986	0.0194468	0.000370565	NR1	rs2179158
TNXB	6:31557542:C:T	12627	-551797	0.75641	4.59959e-07	0.364255	0.0695421	0.0019998	0.00315612	0.000241847	NR1	.
TPMT	6:18711694:C:T	4336	556616	0.792308	0.00239124	-0.388014	0.125919	0.612239	0.298722	0.000396262	NR1	rs9465193
TPP1	11:6344459:C:T	5097	-274964	0.125641	0.00026769	0.460859	0.123886	0.20248	0.154032	0.000163897	NR1	rs72894102
TPSAB1	16:1245817:T:A	4241	5111	0.44359	2.73031e-15	0.665858	0.0767773	9.999e-05	1.71058e-10	0.000211452	NR1	rs8051930
TRAF2	9:137396258:G:A	2811	509741	0.520513	0.0032092	0.231645	0.0775246	0.766523	0.340674	0.000226671	NR1	rs13301273
TREM2	6:40164133:G:C	3896	-998984	0.261538	0.000661587	-0.308995	0.0891264	0.361364	0.214712	0.000182645	NR1	rs66570903
TREML2	6:41198081:C:T	3955	-3069	0.117949	2.35629e-09	-0.742896	0.117988	9.999e-05	1.24918e-05	0.000180978	NR1	rs13207171
TRIAP1	12:119596194:A:G	3582	-850191	0.830769	0.00410215	-0.240387	0.0826547	0.760424	0.338849	0.000381045	NR1	rs10849673
TRIM21	11:3774227:G:A	5065	-619476	0.228205	0.00291015	-0.273164	0.0904719	0.821618	0.352931	0.000196772	NR1	rs678302
TSHB	1:115812911:G:A	3751	783084	0.0974359	0.000634809	-0.546157	0.156996	0.30467	0.195441	0.00030631	NR1	rs72705411
TXLNA	1:32785376:G:A	1974	605700	0.325641	0.000521095	-0.260719	0.0737533	0.09999	0.091149	0.000688481	NR1	rs113236259
TXNDC15	5:134887903:A:G	3060	13531	0.0871795	5.25569e-20	1.54086	0.148385	9.999e-05	1.31316e-14	0.000268434	NR1	rs3733897
TXNDC5	6:7873445:C:G	5011	-37344	0.1	0.000347457	0.473177	0.129693	0.247675	0.171608	0.000216005	NR1	rs9379142
TXNRD1	12:104579930:G:A	4300	364150	0.625641	0.00287966	0.224692	0.0743352	0.787021	0.344171	0.000203781	NR1	rs2665742
TYMP	22:50541642:G:A	2896	11629	0.702564	7.0298e-09	0.464411	0.076301	9.999e-05	2.94614e-05	0.000323302	NR1	rs131785
TYRO3	15:41588421:A:G	3134	29208	0.341026	2.66831e-17	-0.701332	0.0745018	9.999e-05	5.11027e-12	0.000492342	NR1	rs8025212
UBAC1	9:135762468:C:A	3657	-198906	0.241026	0.0017726	-0.235863	0.0743015	0.713929	0.328933	0.000147383	NR1	rs58322339
ULBP2	6:149975762:C:A	4724	33747	0.194872	1.56254e-13	-0.703277	0.0878595	9.999e-05	4.6928e-09	0.000175988	NR1	rs1951931
UMOD	16:20350119:A:G	3502	-2597	0.220513	5.0153e-22	-0.979506	0.0882807	9.999e-05	4.06929e-16	0.000349779	NR1	rs34882080
USP8	15:51397427:A:C	4092	973021	0.887179	0.00691895	-0.427275	0.156346	0.862014	0.36367	0.000469143	NR1	rs1147142
UXS1	2:106376496:A:G	4644	182194	0.723077	0.00140538	0.338896	0.104433	0.59694	0.294813	0.000219093	NR1	rs4641931
VAMP5	2:84924854:C:T	3416	-659578	0.0615385	0.000515084	0.715159	0.202119	0.209879	0.156867	0.000332115	NR1	rs114455963
VASN	16:4385162:G:C	3628	13313	0.753846	0.000575265	-0.185894	0.0530075	0.331067	0.205006	0.000219131	NR1	rs62037617
VAT1	17:43309222:A:G	2364	286836	0.266667	5.69817e-05	-0.427436	0.103609	0.0219978	0.0285576	0.000495203	NR1	rs4792987
VCAM1	1:100778108:C:T	3547	58365	0.0794872	0.00272663	-0.259294	0.0852928	0.59624	0.296288	0.000365188	NR1	rs75240840
VCAN	5:83536320:C:G	3252	64575	0.482051	2.15051e-14	-0.668315	0.0801852	9.999e-05	7.11299e-10	0.000231313	NR1	rs309560
VEGFA	6:43957870:G:A	2890	187658	0.366667	2.34519e-12	-0.443061	0.0587321	9.999e-05	3.81625e-08	0.000187803	NR1	rs6921438
VEGFC	4:176706798:C:T	4371	-86125	0.866667	0.000134959	0.259941	0.0665942	0.0925907	0.0879301	0.000218995	NR1	rs1485765
VMO1	17:4783119:A:C	4259	-3246	0.484615	9.45029e-13	0.691533	0.0898118	9.999e-05	1.54768e-08	0.000222914	NR1	rs3851
VNN2	6:132751511:A:G	3613	-6394	0.382051	1.19978e-17	-0.798911	0.0837463	9.999e-05	1.94915e-12	0.000318895	NR1	rs1883617
VSIR	10:71763954:C:T	3948	-9567	0.176923	1.23713e-06	0.522678	0.104042	0.00129987	0.00225935	0.000207854	NR1	rs12415269
VSTM1	19:54045772:T:C	4507	-18126	0.574359	9.71496e-15	-0.751719	0.0887993	9.999e-05	3.66403e-10	0.000102387	NR1	.
VTA1	6:141838661:T:G	3002	-308603	0.0589744	0.00644187	0.32951	0.119502	0.784322	0.343989	0.000497614	NR1	rs78085941
VWA1	1:2350540:T:C	2386	914849	0.115385	0.0027886	-0.416512	0.137331	0.60314	0.298722	0.000345194	NR1	rs1039064
VWC2	7:49778721:T:G	4630	5082	0.45641	7.02232e-19	-0.585597	0.0586573	9.999e-05	1.17045e-13	0.000267095	NR1	rs481076
VWF	12:7097498:G:A	3520	972827	0.0461538	0.00179473	0.765025	0.241288	0.641536	0.310079	0.000160254	NR1	rs113993694
WARS	14:101068206:G:A	3232	692858	0.0692308	0.000199915	0.522002	0.137406	0.131087	0.110855	0.000173201	NR1	rs75812127
WFDC12	20:45121769:T:C	3646	-2697	0.433333	7.21165e-14	-0.602944	0.074127	9.999e-05	1.58812e-09	0.00030836	NR1	rs6130764
WFDC2	20:44761278:C:T	3349	-708476	0.0692308	0.000909689	-0.390094	0.115601	0.29947	0.195276	0.000309235	NR1	rs6017415
WFIKKN1	16:1489721:G:A	3146	858735	0.1	0.00131226	-0.45031	0.137889	0.516348	0.271284	0.000245483	NR1	rs13336442
WFIKKN2	17:50838518:G:A	3462	2931	0.68718	3.02614e-25	-0.767942	0.0628703	9.999e-05	3.01104e-19	0.000160943	NR1	rs7225019
WIF1	12:64705999:C:T	2558	-415307	0.0948718	0.00218592	-0.464842	0.149488	0.49655	0.264578	0.000377006	NR1	rs34655474
WNT9A	1:227635033:T:C	4113	-312900	0.276923	0.00020013	-0.277352	0.0730126	0.0775922	0.0783836	0.000487347	NR1	rs10916186
WWP2	16:69863566:T:G	2308	101233	0.489744	0.00109451	0.252251	0.0759807	0.243476	0.171535	0.000560997	NR1	rs7200258
XCL1	1:168544005:G:A	4464	-32601	0.253846	8.63296e-18	0.859587	0.0896206	9.999e-05	1.249e-12	0.000194143	NR1	rs1933114
YES1	18:316558:C:T	4019	-495685	0.6	0.000654945	0.350035	0.10088	0.358664	0.214655	0.000177675	NR1	rs621638
ZBTB16	11:114092901:T:C	3699	33189	0.928205	0.000783255	0.668795	0.195659	0.360964	0.214655	0.000230467	NR1	rs238940
ZBTB17	1:15440540:C:T	3575	-535562	0.105128	0.000211638	0.47263	0.124913	0.109589	0.0971073	0.00030492	NR1	rs497078
AARSD1	17:42939605:C:T	2317	-24850	0.276923	5.24442e-05	0.328179	0.0791367	0.0179982	0.0229572	0.000531403	NR2	rs566168
ABHD14B	3:51910151:G:A	1710	-63899	0.125641	0.0055255	-0.33701	0.119951	0.471453	0.250425	0.000957943	NR2	rs11923140
ABL1	9:131767109:C:A	3599	931854	0.802564	3.37845e-05	-0.46662	0.109622	0.0290971	0.036057	0.000169368	NR2	rs2320390
ACAN	15:88420418:C:T	3515	-383019	0.225641	0.00593204	0.283561	0.101796	0.917208	0.370948	0.000252418	NR2	rs7495512
ACP5	19:11587844:C:G	3180	10198	0.146154	4.1429e-06	-0.48488	0.101989	0.00189981	0.00370875	0.000392587	NR2	rs79061565
ACP6	1:147652507:T:G	1770	-18018	0.694872	5.20731e-31	1.0343	0.072715	9.999e-05	1.48154e-23	0.000728702	NR2	rs2153463
ACTA2	10:89116797:T:C	3976	164023	0.0897436	0.000375084	0.458555	0.126406	0.20128	0.150304	0.000243003	NR2	rs111415372
ACVRL1	12:51908034:C:A	4405	529	0.0512821	3.05792e-05	0.637616	0.148935	0.0235976	0.029644	0.000215116	NR2	rs3782479
ACY1	3:52054635:G:A	1717	71099	0.148718	0.00153873	-0.274038	0.08516	0.184482	0.141783	0.000865017	NR2	rs4687607
ADA	20:44626579:T:C	3567	-25121	0.0948718	8.35031e-10	0.808494	0.1245	9.999e-05	4.333e-06	0.000256246	NR2	rs11555566
ADA2	22:17195010:C:A	2914	-24426	0.379487	0.000250422	-0.244795	0.0654774	0.138186	0.113709	0.000203549	NR2	rs5992637
ADAM15	1:155060832:G:A	2242	9515	0.235897	4.56674e-22	0.907759	0.0816412	9.999e-05	1.93541e-16	0.000415036	NR2	rs11589479
ADAM22	7:87762445:A:G	2907	-171807	0.54359	2.12716e-14	-0.568896	0.0682072	9.999e-05	6.05421e-10	0.000503558	NR2	rs7779623
ADAM23	2:206548901:G:A	3463	105368	0.228205	4.44457e-07	0.550269	0.104886	0.00029997	0.00101861	0.000213968	NR2	rs13429599
ADAM8	10:133269306:C:T	2730	-7563	0.884615	1.35601e-09	-0.692055	0.108084	9.999e-05	6.91881e-06	0.000280204	NR2	rs2995310
ADAMTS13	9:133532918:G:A	4569	110550	0.0564103	0.000419253	-0.656772	0.182609	0.326367	0.200139	0.000164131	NR2	rs112155122
ADAMTS15	11:130849763:C:T	3705	401117	0.68718	1.386e-05	0.343419	0.0767813	0.0132987	0.0175584	0.000176515	NR2	rs6590513
ADAMTS16	5:5611499:A:C	4209	471168	0.276923	0.00797024	0.289546	0.107873	0.984102	0.389086	0.000155884	NR2	rs13190371
ADAMTS8	11:130411593:G:A	3728	-17017	0.751282	0.000114888	0.39697	0.100599	0.0945905	0.0869053	0.000189133	NR2	rs2131535
ADGRB3	6:68961693:A:G	5171	326410	0.7	6.32723e-28	-0.974123	0.0740504	9.999e-05	8.75728e-21	0.000406531	NR2	rs3798969
ADGRE2	19:14398152:T:C	4204	-380409	0.738462	2.02417e-06	0.378521	0.0770011	0.00239976	0.00379606	0.000179809	NR2	rs7508244
ADGRE5	19:14838441:T:C	3480	456996	0.0615385	0.00337963	0.422873	0.142306	0.845915	0.352609	0.000175359	NR2	rs139460342
ADGRG1	16:57825500:C:T	4027	196869	0.120513	3.03368e-05	0.436588	0.101932	0.0315968	0.0355963	0.000180254	NR2	.
ADH4	4:99444284:G:A	3872	299986	0.474359	0.00214911	0.219785	0.0705543	0.539446	0.27159	0.000367657	NR2	rs1154482
ADM	11:10574864:G:A	4785	269790	0.166667	0.00222364	-0.304305	0.0980212	0.715928	0.322575	0.000222045	NR2	rs7111477
AFP	4:74399146:G:A	2669	962924	0.54359	2.44188e-05	0.40314	0.0929699	0.00719928	0.0112961	0.000695919	NR2	rs11727089
AGER	6:32770087:A:G	12609	585833	0.651282	0.000257025	0.311299	0.0834236	0.289371	0.187169	0.000227805	NR2	.
AGR2	7:16854901:G:A	5015	49901	0.228205	0.000469455	-0.379309	0.106402	0.356864	0.214059	0.000172685	NR2	rs58672255
AGRN	1:1025561:G:C	1599	5440	0.312821	2.12409e-11	-0.45688	0.0637965	9.999e-05	1.25323e-07	0.000606044	NR2	rs3121554
AGRP	16:67999636:G:A	1536	516088	0.130769	0.0139545	-0.357277	0.143866	0.678232	0.314053	0.0012049	NR2	rs7204974
AGXT	2:240686640:A:G	5153	-182185	0.605128	0.000894626	-0.279082	0.0825752	0.494851	0.258013	0.000166911	NR2	rs10804412
AHSP	16:31659175:C:T	1220	131274	0.1	0.0387852	-0.312948	0.150302	0.915408	0.370948	0.00125737	NR2	rs72796569
AK1	9:128637260:G:C	2158	759584	0.915385	0.0105033	-0.451754	0.174646	0.843216	0.353044	0.000532607	NR2	rs10114606
AKR1B1	7:134354349:C:G	3864	-104752	0.6	0.00193222	0.334335	0.106201	0.50355	0.25856	0.000389071	NR2	rs1646687
AKT1S1	19:50786916:A:G	3237	909560	0.425641	0.00397549	-0.241523	0.0827469	0.890511	0.364486	0.000203134	NR2	rs73584983
ALCAM	3:104624545:C:T	4400	-742365	0.207692	0.00323984	0.224726	0.07528	0.721328	0.322575	0.000333057	NR2	rs62258885
ALDH1A1	9:72254326:G:A	3142	-698728	0.0871795	0.00298105	-0.280981	0.0932906	0.593941	0.288724	0.00046736	NR2	rs11788021
ALPP	2:232436825:T:C	3776	58073	0.228205	6.89317e-09	0.491021	0.0805992	9.999e-05	4.34559e-05	0.00022501	NR2	rs11886043
AMBN	4:70157501:T:C	3755	-434756	0.494872	0.00471538	-0.31335	0.109464	0.716028	0.322575	0.000451107	NR2	rs1514398
AMBP	9:114088796:A:G	4134	10495	0.751282	0.000673403	0.295735	0.0854181	0.39586	0.227286	0.000175843	NR2	rs2093785
AMIGO2	12:47876015:T:C	4209	796055	0.85641	0.00039613	0.446543	0.123613	0.216078	0.15755	0.000267529	NR2	rs7974353
AMN	14:102925361:C:A	2933	2697	0.582051	0.00463615	0.295204	0.102923	0.719828	0.32295	0.000412068	NR2	rs1190227
AMY2A	1:103497405:T:A	3774	-120023	0.261538	2.08412e-08	-0.579949	0.0987132	9.999e-05	5.1268e-05	0.00055521	NR2	rs4244372
AMY2B	1:103493407:T:C	3665	-78183	0.197436	9.25674e-09	0.609841	0.101055	9.999e-05	2.54278e-05	0.00053707	NR2	rs4344361
ANG	14:20676896:T:C	3971	-11869	0.194872	1.8622e-07	0.421292	0.0775877	0.00029997	0.000503942	0.000127664	NR2	rs11629118
ANGPT1	8:107524734:A:C	4128	26815	0.925641	0.000647897	0.283934	0.0817477	0.241976	0.165693	0.000434185	NR2	rs281709
ANGPT2	8:6501598:C:T	6940	-61648	0.217949	0.00018195	0.395832	0.103495	0.219078	0.15755	0.000105937	NR2	rs2916714
ANGPTL1	1:178544207:G:A	4134	-326871	0.0974359	0.00151582	-0.440511	0.136699	0.432757	0.237475	0.000410715	NR2	rs35302804
ANGPTL2	9:126551017:G:A	3026	-571619	0.184615	0.00495865	0.324319	0.113963	0.843716	0.352453	0.00031177	NR2	rs72760742
ANGPTL3	1:62766879:G:A	3812	169358	0.128205	4.08837e-05	-0.340603	0.0809165	0.0274973	0.035221	0.000210537	NR2	rs12084633
ANGPTL4	19:8381172:G:A	4237	17016	0.466667	3.07881e-08	0.46448	0.0801191	9.999e-05	0.000119911	0.00017794	NR2	rs7249520
ANGPTL7	1:10637335:C:T	3163	-552021	0.115385	8.7308e-05	0.513223	0.127756	0.0479952	0.053257	0.00024631	NR2	rs72641442
ANKRD54	22:37134043:C:T	3203	-710292	0.192308	0.00155384	-0.405701	0.126192	0.571543	0.280918	0.000198847	NR2	rs3218313
ANPEP	15:89815788:G:T	3991	935	0.223077	0.00013077	-0.249573	0.0637946	0.070393	0.0692894	0.000286547	NR2	rs28565347
ANXA10	4:167558515:T:A	3722	-534023	0.561538	0.000471058	0.354019	0.0993344	0.229777	0.160132	0.000270153	NR2	rs72703366
ANXA3	4:77760577:A:T	3320	-791194	0.282051	0.000786247	0.311627	0.0911882	0.226077	0.160514	0.000395921	NR2	rs4859875
ANXA4	2:68742308:A:G	3749	-999827	0.0871795	0.00077421	0.644728	0.188413	0.292971	0.189038	0.000304232	NR2	rs78494039
AOC3	17:42847286:G:A	2218	-3914	0.0820513	1.93519e-07	-0.57085	0.105287	0.00029997	0.000251527	0.000573354	NR2	rs35296742
APBB1IP	10:27275042:T:C	5477	836700	0.141026	0.000505153	0.489244	0.138041	0.224378	0.160079	0.000253177	NR2	rs1753385
APEX1	14:20456995:T:G	3390	1768	0.410256	1.6283e-14	-0.505699	0.0603112	9.999e-05	3.81361e-10	0.000160693	NR2	rs1130409
APLP1	19:35380805:C:T	3208	-487770	0.220513	0.00454573	0.197291	0.0686297	0.827617	0.348261	0.000280372	NR2	rs718133
APOH	17:66214462:A:C	4304	-14954	0.0461538	6.12964e-18	-1.61363	0.167189	9.999e-05	1.05858e-12	0.000216776	NR2	rs1801689
APOM	6:31551155:T:G	11077	-104740	0.0871795	0.000853203	-0.333855	0.0983779	0.575142	0.279626	0.000320256	NR2	.
APRT	16:88812323:A:G	4928	394	0.420513	0.000207852	0.267388	0.07057	0.185181	0.140902	0.000129484	NR2	rs535070
AREG	4:74737661:A:G	3669	292524	0.935897	0.00572342	0.556947	0.199073	0.768823	0.337135	0.000353082	NR2	.
ARG1	6:131638899:T:C	3667	65672	0.133333	0.000172241	-0.425925	0.110939	0.0941906	0.0873124	0.00030164	NR2	rs73550998
ARHGAP1	11:45890799:A:T	2078	-809821	0.910256	0.00227678	0.508542	0.1642	0.357664	0.214059	0.000741792	NR2	rs4756039
ARHGAP25	2:69070490:C:T	3707	335678	0.869231	0.00155805	-0.428248	0.133239	0.549845	0.27544	0.000251928	NR2	rs4591376
ARHGEF12	11:120954926:T:C	3834	618512	0.171795	0.00177762	-0.395654	0.124662	0.654635	0.307258	0.000184862	NR2	rs4936569
ARSA	22:50570421:A:G	2677	-57732	0.0589744	1.59595e-06	0.916601	0.184479	0.00219978	0.00291775	0.000316879	NR2	rs2073605
ARSB	5:78991756:T:G	3436	6445	0.625641	5.27782e-12	-0.684622	0.0924385	9.999e-05	5.90103e-08	0.00026264	NR2	rs336526
ART3	4:76104657:G:A	4853	29947	0.14359	1.0918e-06	0.351365	0.0695473	0.00109989	0.00189441	0.000333194	NR2	rs17224545
ASAH2	10:50246241:G:T	2761	-5276	0.633333	2.90982e-11	0.623271	0.0877153	9.999e-05	2.40905e-07	0.000441758	NR2	rs2842124
ASGR1	17:7491022:T:C	3725	311651	0.25641	0.00112693	-0.283389	0.0855753	0.552445	0.278781	0.000153917	NR2	rs56078345
ATOX1	5:151803784:G:A	4830	45152	0.0871795	0.0021687	0.44445	0.142805	0.635736	0.301362	0.000277122	NR2	rs6860383
ATP5IF1	1:28233063:C:G	2180	-3062	0.266667	0.00022015	0.340072	0.0901211	0.0582942	0.059986	0.000611288	NR2	rs510803
AXL	19:40931521:G:C	2837	-287703	0.666667	0.0024172	0.159188	0.0517126	0.60244	0.289675	0.000350507	NR2	rs7248187
AZU1	19:1006387:C:T	2746	178549	0.0769231	0.00038791	-0.478539	0.132256	0.273273	0.18148	0.000137631	NR2	rs11670280
B4GALT1	9:33103175:G:T	4067	-64162	0.525641	1.66229e-05	-0.286446	0.0646717	0.0107989	0.0162129	0.000313057	NR2	rs544723
B4GAT1	11:66322561:C:A	1807	-25069	0.24359	3.52594e-05	-0.337753	0.0795452	0.009999	0.0153115	0.000668111	NR2	rs10219183
BAG3	10:119209705:A:G	4129	-441676	0.582051	0.000187955	0.299047	0.0783671	0.130487	0.108238	0.000199766	NR2	rs4752263
BAG6	6:31341220:C:T	11066	-311442	0.235897	0.0015053	0.337578	0.104689	0.717728	0.322575	0.000292328	NR2	.
BAIAP2	17:80405022:G:T	4428	-630130	0.276923	7.93591e-05	0.415594	0.102825	0.0628937	0.0658994	0.000173855	NR2	rs62068434
BANK1	4:101075959:T:C	3533	-714772	0.0641026	8.33364e-05	-0.754809	0.187335	0.0377962	0.044825	0.000351343	NR2	rs72681037
BCAM	19:45543797:T:G	3598	734693	0.223077	0.000249449	-0.312733	0.0836258	0.159884	0.125714	0.00021542	NR2	rs73942917
BCAN	1:156087177:A:G	3012	-554941	0.0948718	0.00158966	-0.355396	0.110784	0.438856	0.240915	0.000284225	NR2	rs11578696
BCL2L11	2:112107290:A:G	1904	986375	0.651282	0.00735886	0.278648	0.102753	0.805919	0.344315	0.00050611	NR2	rs10203657
BCR	22:23295838:A:G	2693	115328	0.176923	0.00211977	0.387199	0.124126	0.529747	0.267681	0.000318648	NR2	rs17540103
BLMH	17:30313974:G:C	2068	22029	0.25641	5.08485e-19	0.725638	0.0722708	9.999e-05	7.04781e-14	0.000873085	NR2	rs11870192
BLVRB	19:39903804:C:T	3522	-561942	0.707692	0.000295954	-0.244144	0.0661094	0.157784	0.124101	0.000265207	NR2
BMP4	14:53041873:T:A	3732	-914953	0.153846	0.00219917	0.378764	0.12187	0.628937	0.299374	0.000242736	NR2	rs78389413
BMP6	6:6801497:G:A	5201	-924603	0.438462	7.77608e-05	-0.338096	0.083543	0.0751925	0.0749355	0.000194369	NR2	rs10046264
BOC	3:112724314:A:C	3581	-487244	0.446154	0.000494176	-0.294204	0.0828649	0.20348	0.15098	0.000321553	NR2	rs4376006
BPIFB1	20:33101062:G:C	2542	-182153	0.651282	6.39652e-07	-0.445327	0.0861652	0.00019998	0.000878932	0.000515115	NR2	rs761931
BRK1	3:9920473:T:C	3367	-195203	0.571795	0.000709999	0.317143	0.0920069	0.410359	0.231874	0.000165204	NR2	rs783494
BSG	19:1021350:A:T	2412	448753	0.0769231	0.000441614	-0.491433	0.137193	0.270473	0.180225	0.000165164	NR2	rs60583377
BST1	4:15645451:A:G	4148	-57615	0.120513	1.47609e-30	-1.52725	0.108571	9.999e-05	2.44466e-23	0.000176284	NR2	rs7683000
BST2	19:16978210:G:C	3643	-427421	0.0948718	0.00202746	0.505953	0.16148	0.687431	0.316776	0.000185733	NR2	rs8102322
BTN2A1	6:26355055:A:C	3728	-102901	0.269231	1.69759e-05	0.202203	0.0457041	0.009999	0.0135578	0.000552438	NR2	rs6933583
BTN3A2	6:26365451:T:G	3851	252	0.0641026	2.74251e-14	-1.29181	0.155664	9.999e-05	1.16338e-09	0.000468937	NR2	rs58825580
C19orf12	19:29082097:A:T	4625	-633165	0.133333	0.00286764	-0.400104	0.132298	0.813919	0.347271	0.000179914	NR2	rs28392486
C1QA	1:22247682:G:A	3725	-388947	0.153846	0.00126133	0.441112	0.13457	0.508249	0.2609	0.000265705	NR2	rs55642049
C1QTNF1	17:78528939:A:G	4212	-495231	0.625641	0.00105471	-0.234461	0.0703826	0.656534	0.307258	0.000102102	NR2	rs11654267
C2	6:31947367:G:A	12649	19649	0.0641026	1.06721e-05	-0.538918	0.118844	0.0220978	0.0310909	0.000239605	NR2	.
C2CD2L	11:119682968:C:T	3676	575623	0.4	0.00135245	-0.337828	0.103725	0.493751	0.255666	0.000263817	NR2	rs10790332
C4BPB	1:207126914:A:G	2519	38053	0.3	0.000458873	-0.37958	0.106287	0.179382	0.138052	0.000313447	NR2	rs2491393
CA1	8:85477174:T:C	2305	99060	0.7	0.0047732	-0.167985	0.0587665	0.474153	0.251774	0.000827391	NR2	rs703
CA11	19:47806542:A:C	4165	-839646	0.0769231	0.000192814	-0.709257	0.186199	0.138886	0.116397	0.000187163	NR2	rs74487661
CA12	15:63413175:C:T	3527	31328	0.653846	8.35927e-05	0.34127	0.0847156	0.0488951	0.0566174	0.000257847	NR2	rs290564
CA13	8:84748202:G:A	2194	-497257	0.784615	0.00961602	0.328307	0.125397	0.679232	0.312819	0.00094645	NR2	rs10093458
CA14	1:151073048:G:C	1525	815273	0.925641	0.00204026	-0.414364	0.132331	0.218878	0.15755	0.000975674	NR2	rs2864699
CA2	8:85347872:G:A	2360	-116136	0.807692	0.0109974	0.141248	0.0549566	0.711529	0.322575	0.000867806	NR2	rs1496529
CA3	8:85438822:G:C	2338	-38	0.187179	0.000889636	-0.286338	0.0846811	0.133287	0.110602	0.000777758	NR2	rs2072696
CA4	17:60422864:T:G	1659	272890	0.0871795	9.13793e-08	-0.689467	0.123625	0.00019998	8.54423e-05	0.000950535	NR2	rs62082086
CA5A	16:87893616:T:C	5390	-42914	0.217949	5.42978e-13	0.668652	0.0857494	9.999e-05	1.57179e-08	0.000113238	NR2	rs55870502
CA6	1:8974539:A:G	2998	28670	0.428205	2.55132e-14	0.604583	0.0727481	9.999e-05	6.79652e-10	0.000225474	NR2	rs3765963
CA9	9:36047289:C:G	2733	373360	0.517949	0.00074547	0.256808	0.074809	0.253575	0.171837	0.000393545	NR2	rs6476515
CALB1	8:90140207:A:C	2605	57327	0.0538462	0.000808358	0.624631	0.183211	0.143286	0.118011	0.000628015	NR2	rs77355867
CALB2	16:70504797:G:C	2745	-853927	0.120513	0.000712611	-0.492277	0.142859	0.222678	0.15755	0.000527795	NR2	rs11075765
CALCA	11:15446861:A:G	2946	474509	0.794872	0.00614039	0.282765	0.101938	0.822418	0.348802	0.000383141	NR2	rs7946452
CALCOCO1	12:53715875:C:T	3056	-11578	0.210256	5.77532e-09	0.581143	0.0948587	9.999e-05	2.2693e-05	0.000276119	NR2	rs3741659
CANT1	17:78210747:G:A	4210	-799018	0.653846	0.000417624	-0.269724	0.0749716	0.368563	0.21819	0.000106045	NR2	rs7503147
CAPG	2:85394936:T:C	3268	-15431	0.589744	6.57167e-41	-1.0207	0.0575916	9.999e-05	4.2094e-32	0.000313057	NR2	rs6886
CARHSP1	16:9806200:T:C	6908	937193	0.269231	0.000306724	-0.33525	0.0910212	0.30347	0.193329	0.000115068	NR2	rs7191183
CASP3	4:185577184:T:C	4515	927736	0.258974	4.87484e-05	-0.28793	0.069125	0.0531947	0.0570762	0.000141667	NR2	rs4241808
CASP8	2:201300082:C:G	2987	39545	0.1	9.22578e-06	0.639886	0.140051	0.00549945	0.0100149	0.000287487	NR2	rs56328050
CBLIF	11:59551281:G:A	2676	-294219	0.153846	0.00527959	-0.409616	0.145004	0.710429	0.320649	0.000501549	NR2	rs61901646
CBLN4	20:55756753:A:G	3700	-248767	0.74359	0.000231608	0.376826	0.100225	0.145885	0.118487	0.000205375	NR2	rs12624430
CC2D1A	19:13206083:T:C	2884	-700119	0.566667	0.000505755	0.236355	0.0666944	0.277972	0.178834	0.000179689	NR2	rs8101196
CCDC80	3:113440894:C:T	4357	799750	0.497436	0.000916185	-0.249535	0.0739857	0.371763	0.21819	0.000316659	NR2	rs9815835
CCL11	17:33826980:A:T	4098	-458763	0.623077	0.000865061	-0.246877	0.0728344	0.441756	0.24111	0.000155817	NR2	rs11080239
CCL13	17:33522149:C:T	4090	-834332	0.85641	0.00125821	0.308545	0.0941067	0.553545	0.277336	0.000178153	NR2	rs8064308
CCL14	17:35983666:A:G	2719	-3064	0.0717949	3.31663e-15	-0.803998	0.0929945	9.999e-05	1.28393e-10	0.000264056	NR2	rs41341749
CCL15	17:36025195:T:G	2722	23641	0.0487179	2.02391e-19	1.45882	0.143253	9.999e-05	2.40637e-14	0.000299581	NR2	rs9911839
CCL16	17:35980421:T:C	2718	-1077	0.0948718	3.33103e-28	-1.50293	0.113418	9.999e-05	6.18769e-22	0.000253225	NR2	rs112689088
CCL17	16:57523673:C:T	4122	118905	0.258974	1.5802e-05	0.333747	0.0751452	0.0173983	0.0240817	0.000158344	NR2	rs28667938
CCL18	17:36064257:A:G	2733	-16	0.169231	1.15966e-20	0.818498	0.0770391	9.999e-05	3.25418e-15	0.00026426	NR2	rs2015086
CCL19	9:35214480:G:A	3018	523203	0.0461538	0.00569137	0.617549	0.220585	0.720528	0.32295	0.000526349	NR2	rs117415681
CCL2	17:33782230:G:A	4126	-473056	0.68718	0.000104469	-0.317315	0.079912	0.0850915	0.0782489	0.000173732	NR2	rs2087633
CCL20	2:228388431:C:T	4747	574588	0.933333	0.000148447	-0.70097	0.180721	0.0947905	0.0869696	0.00020453	NR2	rs800959
CCL21	9:34420289:T:C	2983	-289848	0.376923	0.00381878	-0.259325	0.0884478	0.612939	0.293952	0.000507838	NR2	rs34537547
CCL22	16:57403978:A:T	4143	45194	0.0615385	0.0032493	0.54765	0.183513	0.894111	0.365442	0.000160372	NR2	rs72792967
CCL23	17:35999179:A:C	2719	-18794	0.85641	3.28829e-05	0.574662	0.134793	0.019998	0.0265264	0.000242105	NR2	rs712048
CCL24	7:75831075:A:G	2101	17268	0.884615	6.37439e-21	-1.32296	0.123454	9.999e-05	3.90148e-15	0.000477547	NR2	.
CCL25	19:8056476:A:G	4203	3715	0.197436	2.07432e-23	0.879262	0.0758752	9.999e-05	1.11588e-17	0.000137379	NR2	rs2032887
CCL26	7:75710654:T:A	2012	-61558	0.684615	0.00363964	0.264365	0.0896887	0.60404	0.291888	0.000516611	NR2	rs7799513
CCL27	9:35269822:T:C	3017	607164	0.782051	0.00102921	0.365071	0.109352	0.252275	0.171421	0.000613586	NR2	rs10121009
CCL28	5:42770563:G:A	3144	-641829	0.0769231	0.00866927	-0.49195	0.185311	0.788621	0.339554	0.000572317	NR2	rs76014428
CCL3	17:36069898:A:G	2731	-20246	0.289744	3.77854e-09	0.520916	0.0839088	9.999e-05	1.58574e-05	0.000260352	NR2	rs854471
CCL4	17:36097317:T:A	2737	-6511	0.269231	8.14823e-06	0.524175	0.114	0.00449955	0.00895721	0.000275843	NR2	rs11658357
CCL5	17:36635996:A:G	2684	755635	0.166667	0.000513341	0.23228	0.0656224	0.216278	0.15755	0.00030941	NR2	.
CCL7	17:35169108:C:T	4128	898886	0.261538	0.000877285	0.31601	0.0933433	0.458054	0.246969	0.000166265	NR2	rs56205527
CCL8	17:34322718:T:C	4063	3282	0.148718	5.09128e-17	-0.867258	0.0930819	9.999e-05	4.785e-12	0.000163861	NR2	rs11575057
CCN1	1:84765554:A:G	4331	-815208	0.166667	0.000709276	0.324173	0.0940383	0.360064	0.215295	0.000213006	NR2	rs10873655
CCN2	6:131968017:C:T	3741	16644	0.215385	4.65685e-05	-0.228361	0.0546734	0.0268973	0.034876	0.000251416	NR2	rs9493157
CCN3	8:119463308:A:C	3801	46861	0.151282	1.33258e-06	-0.484717	0.0967804	0.00119988	0.00179836	0.000348258	NR2	rs4305931
CCN4	8:133012217:G:A	4864	-178823	0.117949	1.35284e-06	0.561966	0.112279	0.00159984	0.00313875	0.000169211	NR2	rs7827593
CCN5	20:44727515:C:T	3570	12145	0.369231	0.000281872	-0.310794	0.083854	0.155784	0.122321	0.00026246	NR2	rs1061098
CCS	11:66982353:C:G	1813	389167	0.0564103	0.0108916	0.298581	0.116014	0.777022	0.337135	0.000732716	NR2	rs11227637
CD109	6:73784654:C:T	4125	88450	0.384615	8.77379e-26	0.731177	0.0589036	9.999e-05	3.37519e-19	0.000436908	NR2	rs9442963
CD14	5:140633982:T:G	2518	806	0.238462	8.81633e-05	-0.294427	0.0733369	0.0282972	0.0362974	0.0005077	NR2	rs5744454
CD160	1:145861639:C:T	263	142139	0.474359	7.94271e-10	0.43128	0.0663174	9.999e-05	4.9009e-07	0.00224811	NR2
CD163	12:7336547:G:T	2527	-167231	0.923077	0.00231191	-0.328593	0.106262	0.560244	0.279465	0.000271215	NR2	rs7484980
CD164	6:108784106:C:G	2978	-598362	0.392308	0.00120555	0.294254	0.0893989	0.307669	0.191824	0.000459833	NR2	rs7760445
CD177	19:43351067:T:A	2922	-2620	0.238462	1.50105e-06	0.572168	0.114843	0.00089991	0.0017062	0.000355031	NR2	rs73039857
CD1C	1:158875254:A:G	4406	585330	0.0410256	0.002426	0.60638	0.197056	0.69613	0.318022	0.000202084	NR2	rs6667119
CD200	3:112609582:A:T	4341	276425	0.384615	1.12473e-05	-0.319208	0.0705857	0.00809919	0.0137926	0.000267381	NR2	rs72622328
CD200R1	3:112921689:G:A	3908	-53415	0.0641026	1.4064e-23	1.58837	0.136375	9.999e-05	1.57551e-17	0.000293612	NR2	rs57891445
CD207	2:70821322:G:C	4168	-14495	0.274359	0.000133911	0.405549	0.10383	0.090191	0.0828773	0.00024223	NR2	rs10185297
CD209	19:7723205:T:C	4201	-24330	0.302564	0.000148535	-0.374536	0.0965654	0.118888	0.103315	0.000168825	NR2	rs8106657
CD22	19:35651394:G:A	3226	322206	0.0820513	0.0012422	0.389213	0.118572	0.469953	0.250889	0.0002476	NR2	rs61220012
CD244	1:160855463:C:T	3094	-7425	0.394872	1.06667e-05	0.355612	0.0784185	0.00939906	0.0117893	0.000273073	NR2	rs4656937
CD27	12:6442708:G:C	3422	-2248	0.212821	1.47386e-07	0.45017	0.08217	0.00029997	0.000346846	0.00019406	NR2	rs3136549
CD274	9:5461729:G:A	3913	11186	0.282051	1.44203e-08	-0.493048	0.0828948	9.999e-05	5.93849e-05	0.000260389	NR2	rs10114060
CD276	15:73711192:G:A	2788	26808	0.0461538	1.07482e-16	-1.56849	0.17052	9.999e-05	1.13311e-11	0.000402887	NR2	rs966378
CD28	2:204156616:A:G	2605	449976	0.123077	0.00406796	0.404242	0.138853	0.716628	0.322575	0.000431738	NR2	rs35556446
CD2AP	6:47459545:T:A	3947	-18245	0.189744	4.78923e-08	0.472428	0.0827578	9.999e-05	0.000119613	0.00030244	NR2	rs1931833
CD300C	17:74530959:C:G	3845	-15157	0.120513	9.27239e-17	0.943345	0.102295	9.999e-05	6.75461e-12	0.000148373	NR2	rs1171186
CD300E	17:74603279:G:A	3956	-20460	0.366667	3.38252e-07	-0.337976	0.0637159	0.00089991	0.000886056	0.000164187	NR2	rs513643
CD300LF	17:74703694:T:C	3787	-9230	0.841026	3.23369e-61	1.31912	0.051399	9.999e-05	6.57208e-50	0.000167241	NR2	rs10512597
CD300LG	17:43981505:T:G	2685	134328	0.107692	0.000845886	-0.352669	0.103845	0.230977	0.160843	0.000485127	NR2	rs4793062
CD302	2:159822656:C:T	4057	24447	0.141026	0.000292587	0.362505	0.0980761	0.130887	0.108238	0.000354812	NR2	rs114113507
CD33	19:51215061:T:A	4585	-10020	0.415385	6.60038e-43	1.07296	0.0581526	9.999e-05	4.24996e-35	9.66466e-05	NR2	rs1697573
CD34	1:208759595:C:A	3259	848469	0.153846	0.00723382	-0.278406	0.10244	0.951305	0.3802	0.000233045	NR2	rs1933568
CD38	4:15768028:A:T	4077	-10301	0.54359	1.69437e-05	-0.253199	0.0572247	0.0147985	0.0205362	0.000216131	NR2	rs4698417
CD4	12:6785283:T:C	3075	-4246	0.317949	9.51537e-06	0.371759	0.081496	0.0059994	0.0102468	0.000217058	NR2	rs10774447
CD40	20:46119308:T:G	3709	993	0.707692	2.28778e-21	0.727824	0.0669383	9.999e-05	8.55566e-16	0.000253116	NR2	rs4810485
CD46	1:208209664:G:A	3085	457609	0.192308	0.000747483	-0.134837	0.0392872	0.320668	0.198389	0.000230231	NR2	.
CD48	1:160684968:C:G	3032	-26855	0.123077	3.75713e-14	-0.79829	0.0968038	9.999e-05	1.19936e-09	0.000215903	NR2	rs2295615
CD5	11:61066152:A:G	2922	-36338	0.412821	0.000569314	-0.242904	0.0691982	0.228177	0.160514	0.000309719	NR2	rs175126
CD55	1:207199596:G:C	2973	-122083	0.315385	2.87729e-11	-0.294637	0.0414537	9.999e-05	3.13483e-07	0.000274988	NR2	rs4844574
CD58	1:116560027:C:T	3109	-11000	0.130769	0.00181409	-0.284406	0.0897868	0.49845	0.257758	0.000345714	NR2	rs1414273
CD59	11:33722133:T:G	3523	-14291	0.235897	0.000570343	-0.218304	0.0621993	0.236176	0.164881	0.000271689	NR2	rs704701
CD6	11:61008737:C:T	2971	37056	0.392308	9.90184e-34	-0.947053	0.06242	9.999e-05	3.19096e-26	0.000345472	NR2	rs11230563
CD63	12:55577876:T:C	2615	-151134	0.123077	0.00134807	0.387372	0.118901	0.261174	0.176039	0.000495791	NR2	rs4759164
CD69	12:10043489:T:C	4327	282587	0.74359	0.00106686	0.281198	0.0844984	0.428657	0.237475	0.00026814	NR2	rs7297150
CD70	19:6589097:T:G	3867	-2054	0.353846	2.82084e-12	0.665856	0.088603	9.999e-05	3.5486e-08	0.000148649	NR2	rs7247830
CD74	5:149799790:C:T	4059	-613121	0.364103	0.000553368	-0.202239	0.0574813	0.315968	0.196261	0.000183209	NR2	rs11747142
CD79B	17:63919139:C:A	1607	-13193	0.261538	8.3211e-05	0.332796	0.0825879	0.0145985	0.0199441	0.000804443	NR2	rs2011732
CD83	6:14814136:C:T	3646	696363	0.179487	0.000225168	-0.369623	0.0981106	0.126687	0.105151	0.000242913	NR2	rs62390271
CD84	1:160502054:A:G	3150	-77443	0.887179	2.72593e-06	-0.604182	0.124597	0.00159984	0.00348141	0.000227076	NR2	rs2050523
CD8A	2:86638016:G:A	1833	-152898	0.130769	7.71086e-07	0.63597	0.124021	0.00029997	0.00063229	0.000915095	NR2	rs4423596
CD93	20:23361463:T:C	4458	275138	0.864103	0.0013716	-0.179995	0.0553365	0.463254	0.248735	0.000283304	NR2	rs1936012
CDCP1	3:45095595:T:G	3709	-50784	0.530769	0.000232412	0.240018	0.0638542	0.10429	0.0917119	0.000365729	NR2	rs2037358
CDH1	16:69682629:T:G	2675	945336	0.269231	0.00479564	-0.157334	0.0550705	0.609339	0.293691	0.000589642	NR2	rs9934264
CDH15	16:89178329:G:A	4464	6580	0.0897436	0.0011241	-0.434578	0.1312	0.585141	0.285957	0.000169853	NR2	rs77727600
CDH17	8:94033112:C:A	3901	-175444	0.605128	0.000539108	-0.329744	0.0935242	0.238876	0.16472	0.00031511	NR2	rs10105926
CDH2	18:28624472:C:A	3251	447341	0.271795	0.000137829	0.299683	0.0768749	0.0519948	0.0582159	0.000366696	NR2	rs8098269
CDH3	16:69514885:T:C	2599	869574	0.907692	0.0129371	-0.281787	0.112211	0.885011	0.363676	0.000602658	NR2	rs7200764
CDH5	16:66081222:C:T	2868	-285470	0.0820513	0.00073255	0.470935	0.136983	0.290671	0.185945	0.000310628	NR2	rs113638652
CDH6	5:31123036:A:G	3975	-70651	0.0820513	2.70148e-09	0.881362	0.140517	9.999e-05	1.72252e-05	0.000193573	NR2	rs10079279
CDHR1	10:84176932:G:A	5061	-17606	0.130769	0.00147065	-0.489657	0.151519	0.512149	0.261153	0.00027059	NR2	rs11594887
CDHR2	5:176689055:C:G	2293	139712	0.117949	0.00148114	-0.315637	0.0977356	0.440056	0.240915	0.000306648	NR2	rs62402655
CDHR5	11:648715:C:A	3641	23759	0.158974	2.52605e-07	-0.615262	0.114659	0.00019998	0.000677724	0.000225743	NR2	rs4074376
CDKN2D	19:11100401:G:A	3485	531421	0.0692308	0.0028639	-0.644473	0.213072	0.707729	0.32111	0.000264286	NR2	rs3745677
CDNF	10:14899056:T:G	5020	61018	0.330769	4.01329e-09	0.527489	0.0851262	9.999e-05	2.91298e-05	0.000150772	NR2	rs7896464
CDON	11:126086214:C:T	4970	23347	0.128205	0.000117684	0.416635	0.105751	0.106889	0.0957925	0.000147691	NR2	rs12417486
CDSN	6:31122513:C:T	9614	2066	0.464103	1.32983e-09	0.520826	0.0812951	9.999e-05	3.538e-05	0.000318062	NR2	.
CEACAM1	19:42535659:T:C	2131	7177	0.184615	6.01527e-07	-0.477901	0.0922317	9.999e-05	0.0003883	0.000671592	NR2	rs6509016
CEACAM21	19:41581783:G:A	2529	5616	0.746154	8.15417e-38	-1.25189	0.0753565	9.999e-05	5.73876e-30	0.000375955	NR2	rs4578777
CEACAM5	19:40963374:G:A	2408	-745253	0.317949	0.000238793	-0.39933	0.106445	0.080392	0.0761869	0.000450741	NR2	rs12978065
CEACAM8	19:43433088:A:G	2201	838163	0.0692308	0.0145456	-0.365335	0.148025	0.872413	0.360643	0.000592052	NR2	rs12976706
CELA3A	1:22236936:G:A	3918	235278	0.792308	0.00217874	0.343749	0.1105	0.723728	0.324363	0.000196144	NR2	rs926436
CES1	16:55810160:C:T	4062	-22937	0.074359	1.49939e-29	-1.32458	0.09656	9.999e-05	1.65323e-22	0.000196415	NR2	.
CES2	16:66874504:C:T	2046	-61013	0.0820513	0.00227974	-0.465116	0.150198	0.410559	0.231899	0.000584774	NR2	rs76033154
CES3	16:67267204:C:T	1998	305937	0.0871795	0.000849163	0.559942	0.164932	0.193581	0.145984	0.000571681	NR2	rs7200971
CFC1	2:130848285:T:C	2258	248709	0.0666667	0.0356655	-0.436859	0.206349	0.994101	0.391311	0.00053265	NR2	rs272108
CGA	6:86242276:A:G	4161	-852831	0.379487	0.000671987	0.278692	0.0804815	0.218078	0.154972	0.000394379	NR2	rs12203889
CGREF1	2:27040254:T:C	2367	-78875	0.561538	1.26536e-06	-0.431919	0.0860429	0.00059994	0.0015507	0.000512395	NR2	rs1866654
CHAC2	2:54403265:G:A	4776	635460	0.7	0.000318606	0.376252	0.102444	0.19578	0.145984	0.000323501	NR2	rs6545403
CHGB	20:5917131:A:C	4383	5620	0.397436	2.85914e-21	-0.688292	0.0635016	9.999e-05	6.63252e-16	0.000180027	NR2	rs446658
CHI3L1	1:203189101:T:C	3101	2396	0.853846	2.89377e-10	0.624276	0.0933103	9.999e-05	1.30075e-06	0.000210329	NR2	rs946262
CHIT1	1:203218965:G:A	3085	-10709	0.217949	8.94679e-29	-1.08908	0.0809785	9.999e-05	7.05271e-23	0.000224772	NR2	rs2244783
CHL1	3:51395:A:G	2448	-145369	0.320513	1.59952e-07	-0.339154	0.0620987	0.00029997	0.000432116	0.000272391	NR2	rs13077895
CHRDL2	11:74684605:G:C	3296	-46822	0.574359	1.96377e-05	0.405739	0.0924424	0.0107989	0.015519	0.000298628	NR2	rs4944058
CIAPIN1	16:56563362:A:G	4130	-884024	0.0871795	2.54046e-05	-0.328904	0.0760193	0.0271973	0.0325463	0.00014953	NR2	rs282231
CKAP4	12:105720854:G:A	3799	-527167	0.810256	0.000781946	-0.277723	0.0812294	0.350365	0.211777	0.000201888	NR2	rs10746043
CKMT1A_CKMT1B	15:43597918:T:C	1470	3890	0.0846154	0.0137717	0.446259	0.179345	0.623338	0.29984	0.0012092	NR2	rs75726580
CLC	19:39346065:T:C	3582	-391965	0.0692308	0.00336741	0.529734	0.178196	0.771923	0.337085	0.00025088	NR2	rs57411196
CLEC10A	17:7083333:C:T	3786	3081	0.194872	4.54809e-12	0.762423	0.102584	9.999e-05	6.37869e-08	0.000148063	NR2	rs314226
CLEC11A	19:50711843:A:G	3945	-11522	0.0615385	1.91099e-10	1.07641	0.159082	9.999e-05	1.60181e-06	0.00012885	NR2	.
CLEC14A	14:38762811:A:C	3584	506717	0.289744	0.00145434	0.236938	0.0732414	0.377462	0.218784	0.000423979	NR2	rs7144683
CLEC1A	12:9681032:C:T	4506	-417954	0.517949	0.000450145	0.315943	0.0883342	0.217178	0.157616	0.000253606	NR2	rs3764021
CLEC1B	12:9971934:T:C	4461	-27188	0.371795	8.81016e-09	0.339504	0.0561683	9.999e-05	3.75542e-05	0.000283727	NR2	rs1797526
CLEC4A	12:7941504:G:A	2683	-182114	0.68718	0.00399614	-0.284872	0.0976553	0.732627	0.32561	0.000313432	NR2	rs7311336
CLEC4C	12:7747588:C:T	2559	212	0.407692	3.38081e-10	0.601621	0.0903106	9.999e-05	1.53497e-06	0.000312836	NR2	rs10845821
CLEC4D	12:8540247:C:T	2852	26743	0.566667	2.74006e-13	0.631899	0.0798487	9.999e-05	4.86349e-09	0.000315986	NR2	rs10841856
CLEC4G	19:8664887:C:T	4200	932776	0.317949	0.00403375	0.275294	0.094471	0.922408	0.372452	0.000159683	NR2	.
CLEC5A	7:141660785:A:G	2556	-286190	0.417949	6.92703e-05	0.319999	0.0784981	0.0252975	0.0310697	0.000389054	NR2	rs3800989
CLEC6A	12:8464475:T:C	2867	8512	0.789744	8.83193e-06	0.443511	0.0968539	0.00429957	0.00824485	0.00035612	NR2	rs4303299
CLEC7A	12:10118488:A:C	4614	-11712	0.0717949	6.4039e-25	-1.47796	0.122008	9.999e-05	1.81806e-18	0.000274815	NR2	rs16910526
CLMP	11:123192617:A:G	4179	-2632	0.530769	5.81427e-06	0.223423	0.0477766	0.00489951	0.00833911	0.000177715	NR2	rs7129640
CLPP	19:7254933:G:C	3756	893401	0.428205	0.000977814	-0.347051	0.103486	0.505349	0.260669	0.000141319	NR2	rs4804195
CLPS	6:35852767:C:G	3145	55443	0.692308	3.53679e-09	0.599208	0.0963233	9.999e-05	1.67285e-05	0.000281486	NR2	.
CLSTN1	1:9450029:G:T	2717	-373937	0.723077	0.00475453	-0.322586	0.112799	0.878512	0.362336	0.000237772	NR2	rs10864424
CLSTN2	3:139916951:G:A	3704	-18235	0.074359	8.95289e-07	0.977153	0.191769	0.00049995	0.00169553	0.000333975	NR2	rs7355825
CLUL1	18:589353:G:C	3445	-7636	0.317949	1.42639e-09	0.583839	0.091319	9.999e-05	7.72181e-06	0.000200212	NR2	rs12955797
CNDP1	18:73752887:G:C	4195	-781614	0.4	0.000278731	-0.27284	0.073553	0.210179	0.154311	0.000143194	NR2	rs2115977
CNPY4	7:100036110:G:A	2421	-83525	0.587179	8.36268e-07	-0.455874	0.0892068	0.00039996	0.00115416	0.000631535	NR2	rs35058708
CNST	1:247360200:T:G	5016	793743	0.928205	0.00640323	-0.561343	0.203414	0.974303	0.386737	0.000188606	NR2	rs7529750
CNTN1	12:40783720:G:A	5001	91280	0.223077	6.33407e-06	-0.372068	0.0799009	0.00359964	0.00824627	0.000370017	NR2	rs12582249
CNTN2	1:205054884:C:T	3577	11671	0.848718	3.09004e-22	-1.06216	0.0950195	9.999e-05	1.70279e-16	0.000178775	NR2	rs1572995
CNTN3	3:74564377:T:C	3136	-50283	0.107692	8.70532e-05	0.448099	0.111524	0.0386961	0.0463814	0.000351202	NR2	rs17012625
CNTN4	3:2092459:C:A	6211	-6408	0.171795	0.000943664	0.311291	0.092534	0.686431	0.315736	0.000101675	NR2	rs9853738
CNTN5	11:99178378:A:C	6218	157428	0.612821	1.35015e-06	-0.420361	0.0839791	0.00149985	0.0032225	0.000225822	NR2	rs12364368
CNTNAP2	7:145494136:C:T	4202	-622666	0.251282	9.38609e-07	0.472591	0.0929348	0.00059994	0.00143056	0.000301034	NR2	rs62504997
COL18A1	21:45486797:G:A	4870	81631	0.366667	0.0023983	-0.233514	0.0757968	0.79842	0.342478	0.000189245	NR2	rs2274809
COL1A1	17:49928056:G:A	3050	-273576	0.0974359	0.000154752	0.547308	0.141506	0.117988	0.100581	0.000185176	NR2	rs79806280
COL4A1	13:111145560:G:T	4854	838402	0.0717949	0.00200773	0.481215	0.153436	0.817618	0.347787	0.000140074	NR2	rs72670018
COL6A3	2:236904937:T:C	4269	-509228	0.533333	0.00199851	-0.166014	0.0529096	0.651635	0.305943	0.000238787	NR2	rs4663676
COL9A1	6:70428181:G:A	3855	125096	0.420513	0.00376644	-0.266927	0.0909011	0.705229	0.321246	0.00035344	NR2	rs13202450
COLEC12	18:394341:C:G	3177	-106361	0.253846	0.000335845	-0.207152	0.0566264	0.189481	0.142902	0.000208273	NR2	rs55639531
COMP	19:18861549:C:A	3140	70243	0.205128	0.00103041	0.188703	0.0565293	0.386361	0.222421	0.000271164	NR2	rs7251329
COMT	22:19962712:C:T	3849	20939	0.505128	1.7121e-14	-0.537313	0.064145	9.999e-05	3.52336e-10	0.000214175	NR2	rs4633
CORO1A	16:29687304:G:T	1379	-496299	0.24359	0.00194138	0.313654	0.0996782	0.260974	0.17355	0.0008033	NR2	rs9922666
COX5B	2:98048489:A:C	2022	402426	0.0692308	0.00939465	0.512528	0.195145	0.69833	0.317314	0.00086914	NR2	rs298913
CPA1	7:131199024:C:T	3657	818529	0.312821	8.98242e-05	-0.395254	0.0985696	0.0631937	0.0657953	0.000210121	NR2	rs6977998
CPA2	7:130252021:A:G	3583	-14843	0.720513	2.16556e-05	0.429827	0.0984615	0.0170983	0.0217743	0.000241392	NR2	rs4389873
CPB1	3:148623326:T:C	3706	-204486	0.417949	0.00262376	-0.27279	0.089367	0.728627	0.324363	0.000206273	NR2	rs62274119
CPE	4:165058396:A:G	4787	-320613	0.915385	0.000143332	0.661716	0.170195	0.0955904	0.0870105	0.000190946	NR2	rs2139219
CPM	12:69159640:T:G	4228	226468	0.174359	0.00011701	-0.383485	0.0973	0.0912909	0.0861102	0.000180197	NR2	rs9805114
CPPED1	16:12793881:G:A	5592	-10007	0.115385	8.98083e-26	0.979715	0.0789482	9.999e-05	3.32526e-19	0.000170489	NR2	rs28583367
CPVL	7:29120988:C:T	4491	-25550	0.228205	3.82133e-16	-0.896344	0.0996464	9.999e-05	2.65999e-11	0.000136564	NR2	rs34219043
CPXM1	20:2803125:A:G	3837	2497	0.0846154	9.37205e-17	-0.847047	0.0918697	9.999e-05	7.65537e-12	0.000176135	NR2	rs13043754
CR2	1:207635058:C:T	3118	180729	0.0564103	0.0026551	-0.432556	0.141881	0.687531	0.317314	0.000242624	NR2	rs56311085
CRADD	12:94118907:C:T	3960	441531	0.117949	0.000408699	-0.366013	0.101565	0.271273	0.178665	0.000191951	NR2	rs17232161
CREG1	1:168437472:G:A	3783	883709	0.0512821	6.31164e-05	-0.800071	0.195131	0.0524948	0.0550774	0.000206025	NR2	rs111414961
CRELD2	22:49896346:C:T	5501	-22289	0.0820513	3.63615e-07	0.683231	0.129177	0.00209979	0.00144299	0.00011398	NR2	rs9616771
CRH	8:66909821:A:G	2471	731356	0.0692308	0.0130322	-0.505193	0.201389	0.89831	0.366191	0.000578405	NR2	rs111432685
CRHBP	5:76871865:T:C	4100	-81181	0.589744	1.31511e-14	-0.674757	0.0801372	9.999e-05	4.99433e-10	0.000174762	NR2	rs55863251
CRIM1	2:35884613:A:C	5267	-471166	0.44359	0.00268012	0.206154	0.0676859	0.790321	0.339554	0.00021916	NR2	rs1554364
CRIP2	14:104517033:C:T	1843	-957789	0.110256	0.00175086	-0.415796	0.130816	0.325667	0.200523	0.000473443	NR2	rs12896116
CRISP2	6:49742392:G:A	3430	28848	0.446154	2.02294e-09	0.521598	0.0824359	9.999e-05	9.93571e-06	0.000586839	NR2	rs555247
CRKL	22:20193603:C:T	2791	-723805	0.269231	0.000644036	0.200269	0.0576311	0.249875	0.17026	0.000260285	NR2	rs646002
CRLF1	19:18269262:G:A	3224	-337538	0.376923	0.00140184	0.309011	0.0951932	0.485651	0.255666	0.000198946	NR2	rs4808776
CRNN	1:152419091:G:A	3285	4827	0.153846	1.75982e-15	-1.00129	0.11445	9.999e-05	6.47174e-11	0.000480346	NR2	rs10494275
CRTAC1	10:98266952:C:T	3345	236330	0.102564	0.00650612	-0.404019	0.146694	0.890311	0.364591	0.000294814	NR2	rs7089690
CRTAM	11:122868010:T:C	3831	29509	0.115385	5.89887e-05	-0.541188	0.131442	0.0447955	0.051843	0.000168937	NR2	rs17126930
CSF1	1:110815773:C:T	3417	904923	0.125641	0.00107955	-0.364099	0.109525	0.465153	0.248308	0.00018603	NR2	rs61803875
CSF3	17:39162776:T:G	2806	-852665	0.225641	0.00219627	-0.388389	0.12495	0.482452	0.254375	0.000410683	NR2	rs544198
CST3	20:23641913:G:A	4478	3957	0.84359	3.578e-08	0.290843	0.0504301	9.999e-05	0.000115587	0.000300347	NR2	rs2424582
CST5	20:23879541:A:G	4589	-208	0.384615	2.15745e-17	0.728826	0.0770984	9.999e-05	1.69623e-12	0.000256224	NR2	rs1799841
CST6	11:65768004:G:A	2057	-244005	0.120513	0.00415815	-0.320845	0.11048	0.567743	0.279626	0.000640313	NR2	rs534281
CST7	20:24991697:C:T	3877	42427	0.194872	1.48938e-12	-0.760152	0.0996893	9.999e-05	2.32381e-08	0.000491973	NR2	rs7268095
CSTB	21:43781951:G:A	4460	5642	0.371795	1.10222e-14	-0.531088	0.0628576	9.999e-05	6.54496e-10	0.000203396	NR2	rs35285321
CTRB1	16:75225453:C:A	3844	6464	0.0666667	2.7598e-09	1.02477	0.163487	9.999e-05	1.58574e-05	0.000336682	NR2	rs117089763
CTRC	1:15455007:C:T	4506	16563	0.202564	0.00014836	0.439128	0.11321	0.110389	0.0983832	0.00018879	NR2	rs35084217
CTSB	8:11849518:A:G	3790	-18570	0.589744	4.9046e-07	0.418951	0.080177	0.00049995	0.00140696	0.000306694	NR2	rs2740593
CTSC	11:88371133:T:C	4164	33396	0.130769	1.46314e-14	1.02423	0.121897	9.999e-05	6.89047e-10	0.000305147	NR2	rs72968617
CTSD	11:1670084:T:C	4680	-93844	0.676923	0.000278487	0.225849	0.060881	0.230577	0.160581	0.000128599	NR2	rs28377091
CTSF	11:66045138:A:G	1774	-523469	0.797436	0.0037454	-0.335724	0.114259	0.468853	0.24917	0.000805009	NR2	.
CTSH	15:78954000:T:A	4513	8953	0.8	1.84758e-22	-1.07581	0.0955719	9.999e-05	1.64487e-16	0.000214411	NR2	rs7177831
CTSL	9:87620879:A:C	3645	-105241	0.207692	0.00131489	0.402539	0.123272	0.485351	0.253649	0.000201689	NR2	rs11141915
CTSO	4:155950185:T:A	4587	-3682	0.817949	7.49609e-05	0.45132	0.111262	0.0542946	0.0590494	0.000207589	NR2	.
CTSS	1:150753762:C:T	2013	-12017	0.35641	2.12853e-06	-0.354433	0.0722658	0.00069993	0.00137361	0.000740066	NR2	rs7526489
CTSV	9:96112978:T:C	2853	-926165	0.161538	0.00834123	0.261928	0.0981649	0.886611	0.364486	0.000382659	NR2	rs16910499
CTSZ	20:58977066:A:G	3179	-30189	0.923077	0.0014829	0.358498	0.11102	0.647435	0.305558	0.00015464	NR2	rs151332
CX3CL1	16:56867019:C:T	4135	-505472	0.0820513	0.00290866	-0.496343	0.164367	0.866613	0.359063	0.000175209	NR2	rs13306673
CXADR	21:17458530:G:A	3870	-54514	0.505128	0.000310407	0.352289	0.0957324	0.179982	0.138052	0.000167515	NR2	rs4320015
CXCL1	4:73868951:T:C	2849	-443	0.330769	6.23177e-11	0.544237	0.0780896	9.999e-05	2.48874e-07	0.000465988	NR2	rs3117604
CXCL10	4:75105925:C:T	4934	-917573	0.123077	0.000256191	0.463653	0.124223	0.134387	0.109982	0.00027047	NR2	rs6534602
CXCL11	4:76253316:A:C	4923	217245	0.748718	0.00674718	0.248476	0.0906284	0.916108	0.371604	0.000295579	NR2	rs10856883
CXCL12	10:44655407:A:G	4748	270309	0.0717949	0.000789583	0.596371	0.174573	0.325267	0.199171	0.000314628	NR2	rs79791866
CXCL13	4:78173782:A:C	4469	567961	0.633333	0.00501904	0.26292	0.0925188	0.819518	0.348048	0.000319895	NR2	rs17003018
CXCL16	17:4726230:G:A	4271	-13699	0.123077	0.000313843	0.42838	0.116506	0.186381	0.140902	0.000239445	NR2	rs9894403
CXCL17	19:41641662:C:G	2049	-801285	0.723077	0.00249144	-0.178941	0.0583097	0.331567	0.200982	0.000706424	NR2	.
CXCL3	4:74079117:C:T	2670	40427	0.579487	0.00851778	0.112459	0.0422635	0.808419	0.344623	0.000537365	NR2	rs13128896
CXCL5	4:74007885:T:C	2648	9207	0.907692	2.69901e-10	-0.592242	0.0883532	9.999e-05	1.01621e-06	0.000487853	NR2	rs187082
CXCL6	4:73772199:C:T	2840	-64480	0.364103	5.41271e-13	0.571702	0.0733113	9.999e-05	8.81938e-09	0.000512581	NR2	rs6831029
CXCL8	4:74177661:T:C	2946	437091	0.389744	0.00891522	0.18874	0.0713604	0.809919	0.344712	0.000473378	NR2	rs1371795
CXCL9	4:76692490:T:C	4938	684980	0.125641	0.00688464	0.311244	0.113809	0.925507	0.373057	0.000301244	NR2	rs67732701
DAG1	3:50165927:G:A	1662	695659	0.0769231	0.00326436	-0.378777	0.126988	0.29827	0.190346	0.00128082	NR2	rs75208336
DARS1	2:135794801:A:G	3088	-190826	0.0487179	0.00293597	0.64351	0.213312	0.538746	0.270168	0.000552784	NR2	rs3213891
DBI	2:118808983:C:A	3124	-557995	0.65641	0.00122881	-0.201942	0.0614597	0.40176	0.227885	0.000337491	NR2	rs10191670
DBNL	7:43391546:G:C	3483	-653157	0.353846	0.000977251	0.251985	0.0751346	0.352165	0.211777	0.000313971	NR2	rs10253699
DCBLD2	3:98957019:C:A	4321	55323	0.307692	0.00131981	0.276169	0.0846023	0.357664	0.212489	0.000391985	NR2	rs4857108
DCN	12:90224329:A:G	3267	-958489	0.074359	0.000657126	0.49795	0.143533	0.227177	0.160514	0.000339097	NR2	rs78783099
DCTN1	2:75155992:C:A	2799	775680	0.0846154	0.0061098	-0.420451	0.151482	0.822118	0.348048	0.000374608	NR2	rs13389311
DCTPP1	16:31405205:C:T	1312	975174	0.307692	0.0136691	0.198738	0.0797817	0.778822	0.337135	0.000877565	NR2	rs11863026
DCXR	17:82076175:G:A	4070	38477	0.0794872	0.000270112	-0.425742	0.114508	0.162284	0.128145	0.00021357	NR2	rs62078735
DDAH1	1:86094613:C:T	4367	629453	0.0564103	0.00093777	0.634374	0.18847	0.416558	0.230628	0.000256433	NR2	rs55729234
DDC	7:50544504:A:G	4124	-20902	0.579487	0.000649711	0.300144	0.0864346	0.271073	0.178834	0.000272656	NR2	rs3779074
DDR1	6:30835842:A:G	11400	-48678	0.658974	3.81422e-06	-0.355093	0.0743953	0.00669933	0.0119396	0.000285964	NR2	.
DDX58	9:32707075:T:C	4908	180878	0.125641	0.000878772	-0.472893	0.139704	0.361864	0.21439	0.000292747	NR2	rs7030127
DECR1	8:90873224:G:A	2664	871746	0.0897436	0.00307501	-0.476532	0.15874	0.408459	0.231631	0.000754576	NR2	rs77264484
DEFA1_DEFA1B	8:6971259:T:C	4425	-27940	0.0769231	0.000174356	0.431259	0.112423	0.139986	0.115427	0.00018593	NR2	rs12682063
DEFB4A_DEFB4B	8:6531695:T:G	2648	-885169	0.638462	0.00090443	-0.313555	0.092863	0.372163	0.218064	0.000267042	NR2	rs12674822
DFFA	1:10932879:C:T	2112	460349	0.423077	0.00564353	-0.196272	0.0700358	0.783622	0.337739	0.000323389	NR2	rs71645078
DKK1	10:52652733:A:C	4700	338451	0.682051	1.16908e-05	0.243757	0.0540107	0.00729927	0.0142577	0.000234823	NR2	rs1159798
DKK3	11:11217449:C:T	4991	-791178	0.102564	8.07621e-05	-0.453447	0.112316	0.10309	0.092118	9.9632e-05	NR2	rs6484750
DKK4	8:41599575:C:T	2609	-777655	0.223077	0.000256356	0.361014	0.0967284	0.080492	0.0769833	0.000576717	NR2	rs2977844
DKKL1	19:49357995:G:A	3139	-5883	0.389744	8.07137e-55	-1.26538	0.0549808	9.999e-05	3.12964e-44	0.000191975	NR2	.
DLK1	14:100706787:A:C	3193	-20106	0.210256	5.78744e-10	-0.629452	0.0959203	9.999e-05	3.8071e-06	0.000174261	NR2	rs17099623
DLL1	6:170092910:T:G	2971	-198169	0.130769	0.000143551	-0.34182	0.087926	0.0681932	0.0681034	0.000353779	NR2	rs28494764
DNAJA2	16:46435570:C:T	948	-538105	0.120513	0.0548795	0.174305	0.0901844	0.920908	0.372452	0.00158959	NR2	rs7359480
DNAJB1	19:14535779:G:A	3374	17381	0.151282	0.000273965	-0.3208	0.0863724	0.174883	0.13341	0.000222792	NR2	rs34256394
DNER	2:229680267:T:C	4660	-34289	0.805128	2.79504e-05	-0.427899	0.0994366	0.0216978	0.0275181	0.000211917	NR2	rs2216248
DNMBP	10:100829577:C:A	3292	819629	0.25641	4.80174e-05	-0.343306	0.0823446	0.0219978	0.028421	0.000426797	NR2	rs11190719
DNPH1	6:43219037:A:T	2710	-10445	0.0717949	1.42458e-10	-0.648541	0.0950956	9.999e-05	9.6975e-07	0.000222715	NR2	rs77379690
DPEP1	16:89626782:A:G	3456	13139	0.612821	7.59932e-22	0.852294	0.0771915	9.999e-05	1.00232e-15	0.000274252	NR2	rs444964
DPEP2	16:68287956:G:A	2056	288471	0.128205	0.00162071	0.41462	0.129483	0.216578	0.154311	0.000851529	NR2	rs2305811
DPP10	2:115361007:G:A	2804	918365	0.525641	0.000811419	-0.280825	0.0823958	0.248575	0.170136	0.000384597	NR2	rs17823359
DPP4	2:162033665:T:C	2238	-40551	0.635897	0.000723943	0.155284	0.0451233	0.131987	0.110861	0.000637172	NR2	rs1558957
DPP6	7:153638164:C:A	4503	-414235	0.148718	4.40234e-05	0.428776	0.102312	0.0428957	0.0476251	0.000138925	NR2	rs60433646
DPP7	9:137004813:T:C	2663	-109921	0.725641	0.000145914	0.395896	0.101949	0.0776922	0.0736836	0.000267709	NR2	rs4355883
DPT	1:168738519:A:G	4543	9312	0.697436	4.7973e-09	0.39492	0.0640872	9.999e-05	2.14478e-05	0.000219781	NR2	rs494189
DPY30	2:32647397:T:C	3153	607591	0.0615385	0.000815356	-0.429228	0.12599	0.317268	0.196261	0.000366823	NR2	rs77519832
DRAXIN	1:11692083:G:A	2971	372	0.0666667	1.23666e-07	-0.836947	0.151763	9.999e-05	0.000298634	0.000216569	NR2	rs6679089
DSC2	18:30363510:C:A	4365	-738912	0.469231	0.00148916	0.183651	0.0568957	0.540046	0.27159	0.000220124	NR2	rs12969166
DSG2	18:31498553:A:C	3936	375	0.361538	0.000170584	-0.241964	0.0629809	0.0976902	0.0912775	0.000226048	NR2	rs9945420
DSG3	18:31853354:G:C	3947	405612	0.0538462	0.00190325	0.485565	0.154011	0.614039	0.293952	0.00027916	NR2	rs8099528
DSG4	18:31307127:C:A	3992	-69651	0.074359	0.000183696	0.58269	0.152453	0.114489	0.100118	0.000217657	NR2	.
DTX3	12:57454856:G:A	2899	-149969	0.538462	0.012854	-0.180103	0.0716516	0.916808	0.371611	0.000501449	NR2	rs3809114
EBAG9	8:108719086:G:A	2834	-821088	0.261538	0.00103709	0.322607	0.096698	0.237876	0.164899	0.000528379	NR2	rs12707824
EBI3_IL27	19:4259517:C:T	3627	29993	0.320513	1.75586e-09	-0.542601	0.0853933	9.999e-05	1.13969e-05	0.000163844	NR2	rs4807561
ECE1	1:20523474:G:T	3975	-766990	0.1	0.00330005	0.482207	0.161854	0.821118	0.347787	0.000242692	NR2	rs17412543
EDAR	2:108928133:G:A	3007	-61088	0.0435897	9.09119e-05	0.879273	0.219446	0.0366963	0.042331	0.000380756	NR2	rs62151088
EDIL3	5:84018559:A:T	4059	-366322	0.264103	0.00142347	-0.274336	0.0846318	0.481052	0.252931	0.000274242	NR2	rs57877116
EFEMP1	2:55785926:A:C	4247	-137857	0.276923	3.37065e-05	0.179538	0.0421729	0.0262974	0.0332747	0.000329098	NR2	rs17047234
EFNA1	1:155157915:G:A	2242	30038	0.346154	7.62308e-09	-0.438905	0.0722764	9.999e-05	2.29598e-05	0.000439411	NR2	rs4971079
EFNA4	1:155093151:G:A	2234	29410	0.133333	0.00192959	0.288032	0.091481	0.444756	0.241017	0.000425392	NR2	rs4845408
EGF	4:109904478:G:A	3475	-8406	0.274359	0.00150106	0.212717	0.0659495	0.482252	0.252805	0.000259249	NR2	rs17316633
EGFL7	9:136252906:A:G	2816	-410011	0.823077	0.0140227	0.244851	0.0986662	0.995	0.391311	0.000226499	NR2	.
EGFR	7:54079830:T:G	4746	-939188	0.707692	0.000366991	0.237439	0.0653439	0.185281	0.142004	0.000282495	NR2	rs7787727
EGLN1	1:232202623:T:C	4229	780335	0.451282	0.00229471	0.219445	0.0709111	0.779522	0.337135	0.000149155	NR2	rs7418143
EIF4B	12:52300372:A:G	4206	-706085	0.0512821	0.00614592	0.372968	0.134472	0.940106	0.37707	0.000212392	NR2	rs76413558
EIF4EBP1	8:38932279:C:T	2525	901744	0.317949	0.00107951	-0.190384	0.0572694	0.348165	0.210451	0.000317405	NR2	rs4509281
EIF4G1	3:184773258:T:C	3967	458651	0.371795	0.000980816	-0.185395	0.0552972	0.456654	0.246969	0.000214058	NR2	rs79666159
ELOA	1:23750961:C:T	3125	7489	0.110256	0.000308207	-0.446208	0.12119	0.128187	0.107751	0.000282224	NR2	rs2235541
ENAH	1:226644516:A:G	3818	991392	0.0589744	0.000152069	-0.742795	0.19182	0.0812919	0.0784915	0.000320262	NR2	rs72754511
ENG	9:127839297:C:T	2170	-15362	0.141026	1.5126e-05	-0.451953	0.101521	0.00469953	0.00894746	0.000582086	NR2	rs41476651
ENO1	1:9271185:T:C	3112	392498	0.458974	0.00689573	-0.217773	0.0796469	0.950105	0.379701	0.000214281	NR2	rs1138467
ENO2	12:7548159:C:T	3108	633578	0.794872	0.00322244	0.277214	0.0928092	0.762024	0.335203	0.000232112	NR2	rs10845405
ENPP2	8:119733117:C:A	3849	94277	0.348718	2.89059e-08	-0.351457	0.0604919	0.00019998	8.47331e-05	0.000381409	NR2	rs13261032
ENPP5	6:46115200:C:T	3510	-55781	0.733333	2.15946e-16	-0.7834	0.0862131	9.999e-05	8.58147e-12	0.000265602	NR2	rs995563
ENPP7	17:79723327:A:G	4451	-7617	0.292308	4.77774e-26	1.02453	0.0819322	9.999e-05	5.2948e-20	0.000120574	NR2	.
ENTPD2	9:137041689:G:A	2721	-12373	0.1	0.00022211	0.63935	0.169539	0.114889	0.100118	0.000258636	NR2	rs13289619
ENTPD5	14:74007693:T:C	3470	-11596	0.0666667	6.83338e-09	-1.15442	0.18944	9.999e-05	2.89003e-05	0.000406044	NR2	rs117818304
ENTPD6	20:25239473:G:A	3571	43760	0.0717949	0.00229129	0.537739	0.173738	0.437456	0.240006	0.00049643	NR2	rs113306130
EPCAM	2:47573092:C:T	4177	203780	0.0589744	0.000184611	-0.743074	0.194483	0.146085	0.117371	0.000213237	NR2	rs34309501
EPHA1	7:143232544:C:A	2230	-176313	0.0948718	0.00889048	0.368234	0.139173	0.763024	0.335157	0.000620151	NR2	rs77184215
EPHA2	1:15410646:G:A	3462	-745424	0.0871795	6.60872e-05	0.484095	0.118404	0.0347965	0.0403249	0.000344734	NR2	rs79280654
EPHB4	7:101255910:G:T	3614	428386	0.274359	0.000998578	0.221873	0.0662821	0.392461	0.227603	0.0002986	NR2	rs35550811
EPHB6	7:142812665:G:A	2308	-42412	0.251282	6.38962e-05	-0.29521	0.072054	0.0221978	0.0277868	0.000406569	NR2	.
EPO	7:100993912:C:A	3402	273443	0.230769	0.00075859	-0.386103	0.112639	0.313069	0.194897	0.000339207	NR2	rs10247974
EPS8L2	11:706284:G:T	4018	52	0.205128	6.0303e-07	-0.505415	0.0975518	0.00089991	0.00136246	0.000219918	NR2	rs11246276
ERBB2	17:39648099:T:C	2301	-51966	0.0666667	0.00150614	0.340658	0.105649	0.380862	0.220841	0.000384829	NR2	rs12103674
ERBB3	12:56049558:C:T	2384	-30608	0.458974	0.0067494	0.195275	0.0712269	0.69553	0.317908	0.000597811	NR2	rs11171731
ERBB4	2:212119730:G:A	4045	-419073	0.630769	0.000566739	0.250847	0.0714348	0.278772	0.18081	0.000237718	NR2	rs7426206
EREG	4:74756831:T:C	3500	391685	0.0794872	0.00520429	-0.552367	0.195205	0.733327	0.325665	0.000351325	NR2	.
ERP44	9:99263597:C:T	2794	-835404	0.612821	0.00949992	0.221543	0.0844795	0.823618	0.348802	0.000565693	NR2	rs1746155
ESAM	11:124229383:G:A	4595	-532908	0.476923	0.00169449	0.147616	0.0462964	0.576042	0.281862	0.000277909	NR2
ESM1	5:54091931:C:A	4635	-893663	0.433333	0.00108418	-0.281072	0.0845819	0.392961	0.227286	0.00029798	NR2	rs695905
EZR	6:158612020:G:A	4959	-207349	0.120513	5.12919e-05	-0.484626	0.116705	0.0355964	0.0416683	0.000219166	NR2	rs12208498
F11R	1:161233437:G:A	3146	212284	0.210256	0.00277376	-0.267241	0.0880573	0.684132	0.314801	0.000241549	NR2	rs2502815
F2R	5:76663238:G:A	4152	-52889	0.469231	2.54431e-06	0.285068	0.0586005	0.00209979	0.00424331	0.000212877	NR2	rs3797446
F3	1:93611003:G:A	4010	-930757	0.14359	0.00100986	0.38339	0.114647	0.407759	0.22948	0.000263156	NR2	rs236344
F7	13:113115325:T:G	4109	9533	0.187179	3.40285e-21	-0.597038	0.0552182	9.999e-05	1.5051e-15	0.000218713	NR2	rs493833
FABP1	2:88471250:A:G	1120	343187	0.553846	0.00327979	-0.218538	0.073304	0.353865	0.212489	0.000837769	NR2	rs1016839
FABP2	4:120136154:A:G	3732	814015	0.0666667	0.00535427	0.560997	0.198924	0.765723	0.336262	0.000487289	NR2	rs17010781
FABP4	8:81243976:C:T	3247	-239258	0.176923	0.00749214	0.241929	0.0894171	0.847715	0.35408	0.000377186	NR2	rs59466934
FABP5	8:81515838:A:G	2846	235301	0.225641	0.00173447	0.258202	0.0811608	0.406259	0.230151	0.000362888	NR2	rs62514763
FABP6	5:160636127:G:A	4403	406620	0.115385	0.00264158	0.519449	0.170293	0.774723	0.337135	0.000237838	NR2	rs34471074
FABP9	8:81453982:A:T	3222	-7598	0.182051	0.010994	0.274705	0.106877	0.924408	0.372628	0.000437752	NR2	rs16909138
FAM3B	21:41339352:C:T	5315	22550	0.15641	1.1106e-12	-0.876492	0.114192	9.999e-05	2.22669e-08	8.23256e-05	NR2	rs11909649
FAM3C	7:120512770:A:T	3056	-883539	0.0564103	0.00241261	0.443129	0.143923	0.470653	0.251486	0.000476627	NR2	rs76060178
FAP	2:162884591:T:C	2304	641145	0.0538462	0.0020837	0.420453	0.134557	0.317268	0.196884	0.000638575	NR2	rs17732398
FAS	10:89009208:A:G	4012	18409	0.305128	0.000102316	-0.252374	0.0634709	0.0675932	0.0692734	0.000220083	NR2	rs7911226
FASLG	1:172998967:A:C	3422	339863	0.0717949	0.00595462	-0.447885	0.16086	0.839216	0.352453	0.000360854	NR2	rs72716582
FBP1	9:94835868:T:C	3441	196349	0.0615385	0.00291093	-0.515698	0.17079	0.579042	0.28409	0.000451236	NR2	rs7019540
FCAR	19:54867770:C:T	3807	-6466	0.241026	1.92158e-18	0.881187	0.0896125	9.999e-05	1.13744e-13	0.000118594	NR2	.
FCER2	19:7695134:T:A	4208	-6998	0.164103	0.00164824	-0.346046	0.108242	0.69973	0.319962	0.000136466	NR2	rs11260015
FCGR2A	1:161506415:A:G	3585	957	0.210256	1.3782e-47	-1.16021	0.0574532	9.999e-05	2.42127e-38	0.000237111	NR2	rs9427398
FCGR2B	1:161509955:A:G	3519	-153189	0.382051	3.71157e-14	-0.720805	0.0873862	9.999e-05	1.21816e-09	0.00023136	NR2	rs1801274
FCGR3B	1:161627387:C:G	3530	-3790	0.34359	2.60181e-09	-0.493117	0.0785285	9.999e-05	1.275e-05	0.000243744	NR2	rs35139848
FCN2	9:134884873:A:T	4624	4062	0.0871795	2.76135e-07	-0.652384	0.122003	0.00069993	0.000900505	0.000101388	NR2	.
FCRL1	1:157802090:C:T	4300	-18031	0.494872	1.02664e-09	-0.516868	0.0800694	9.999e-05	5.64318e-06	0.000231377	NR2	rs4971154
FCRL2	1:157766308:A:G	4296	-10825	0.197436	3.01064e-12	0.821686	0.109503	9.999e-05	4.19364e-08	0.00024618	NR2	rs112537702
FCRL3	1:157699488:C:T	4129	-1282	0.407692	1.74602e-23	0.935762	0.0805694	9.999e-05	1.14362e-17	0.00025886	NR2	rs3761959
FCRL5	1:157545568:A:G	4012	-6948	0.251282	2.94011e-06	-0.441969	0.0914662	0.00189981	0.00358117	0.000238123	NR2	rs6683511
FCRL6	1:159824724:G:A	3345	22363	0.174359	4.37897e-17	-1.02021	0.109218	9.999e-05	3.19654e-12	0.000216139	NR2	rs2494495
FCRLB	1:161714831:T:G	3509	-6714	0.712821	1.59554e-07	-0.587982	0.107648	0.00029997	0.000389546	0.000243094	NR2	rs2333749
FETUB	3:187445514:A:G	3849	805114	0.202564	0.00144678	-0.278035	0.085903	0.670633	0.311236	0.000141864	NR2	rs9824824
FGF19	11:69900782:G:A	4212	196759	0.182051	0.000770547	-0.436637	0.12755	0.421758	0.237464	0.000172881	NR2	.
FGF21	19:47968954:A:G	4013	-786571	0.110256	0.000480208	-0.455381	0.12797	0.287071	0.184658	0.000191179	NR2	rs59082129
FGF23	12:3757109:C:T	3886	-622604	0.0794872	4.74851e-05	0.735618	0.176326	0.0513949	0.054001	0.000103221	NR2	rs78843725
FGF5	4:80263187:A:T	3278	-3478	0.233333	2.99234e-12	0.69758	0.0929507	9.999e-05	3.659e-08	0.000444949	NR2	rs16998073
FGFBP1	4:16651703:T:C	3952	712962	0.251282	0.000254336	0.40294	0.107899	0.149685	0.124101	0.000236703	NR2	rs2132631
FGFR2	10:121552184:G:A	4500	-46261	0.523077	0.000313234	-0.260444	0.0708221	0.245775	0.165693	0.000168041	NR2	rs2981430
FIS1	7:100774703:G:A	3818	-470379	0.0615385	0.00590871	-0.512257	0.183807	0.906009	0.368885	0.000301299	NR2	rs2571603
FKBP4	12:2661725:T:C	4081	-133246	0.717949	0.000105549	0.325794	0.0821027	0.0957904	0.0869696	0.000125558	NR2	rs4765701
FKBP5	6:35530533:G:A	3091	-158383	0.117949	0.00244605	0.338699	0.11016	0.560444	0.278781	0.000360102	NR2	rs12214725
FLRT2	14:85609613:G:T	4400	79468	0.889744	9.18066e-09	0.75888	0.125718	9.999e-05	4.31292e-05	0.000240517	NR2	rs2753615
FLT1	13:28762590:G:A	4305	267461	0.44359	0.000461275	-0.303597	0.0850455	0.248675	0.170248	0.000204721	NR2	rs4272874
FLT3	13:28579184:T:G	4134	478607	0.823077	0.00045263	0.409724	0.114604	0.242076	0.165265	0.000212978	NR2	rs7989637
FLT3LG	19:49523009:C:T	3171	48793	0.176923	0.00114868	-0.340675	0.103051	0.479052	0.252906	0.000219529	NR2	rs62128087
FLT4	5:180646936:T:C	3486	-2665	0.538462	0.000426808	0.32369	0.0901241	0.267173	0.176322	0.000217878	NR2	rs307813
FMNL1	17:44316126:C:T	4550	-905760	0.279487	0.00165533	-0.360752	0.112888	0.439756	0.240006	0.000380999	NR2	rs2074104
FOLR1	11:72252085:A:C	2999	59944	0.074359	0.00630013	-0.353616	0.127884	0.80222	0.344712	0.000436887	NR2	rs3900852
FOLR2	11:72622355:A:G	3009	405560	0.417949	0.000159054	-0.283989	0.0735637	0.0581942	0.0624877	0.000412302	NR2	rs61895572
FOLR3	11:72159189:C:T	3058	23463	0.0820513	2.16719e-25	1.47263	0.119951	9.999e-05	5.29118e-19	0.000481733	NR2	rs7939902
FRZB	2:182833872:T:C	4208	-32766	0.133333	2.62926e-10	-0.789886	0.117754	9.999e-05	1.97654e-06	0.000384768	NR2	rs16823797
FST	5:53445098:G:T	4903	-35532	0.382051	0.000103514	-0.360608	0.0907605	0.0656934	0.0682625	0.000246249	NR2	rs7722616
FSTL3	19:401520:G:A	2492	-274873	0.0897436	0.00126416	0.331524	0.101159	0.576642	0.282586	0.000149617	NR2	rs72988443
FUCA1	1:23843968:C:T	3043	-24323	0.258974	1.14721e-05	-0.498682	0.110387	0.00589941	0.00970251	0.00035143	NR2	rs10917430
FURIN	15:90885725:C:T	4096	17136	0.351282	9.07252e-05	0.267537	0.0667621	0.0692931	0.0700916	0.000224067	NR2	rs1894400
FUS	16:31373233:T:C	1367	193093	0.320513	0.00472092	0.25718	0.0898544	0.433857	0.238193	0.00099487	NR2	rs2070896
FUT3_FUT5	19:5841345:G:T	3685	-10105	0.0564103	2.22877e-07	-1.01836	0.188855	0.00049995	0.000677724	0.000151922	NR2	rs3760775
FUT8	14:65366781:C:T	3657	-45950	0.802564	2.14501e-08	-0.53849	0.0917456	0.00019998	7.90041e-05	0.000305659	NR2	rs10149004
FXN	9:69793545:T:C	2774	757792	0.725641	0.0159415	-0.208688	0.0857415	0.986701	0.389874	0.000343487	NR2	rs10780636
FYB1	5:39724459:A:T	3870	504895	0.905128	0.00559337	0.384011	0.13688	0.841816	0.352453	0.000342147	NR2	rs9686826
GAL	11:68251962:G:A	3580	-432583	0.348718	0.00252189	-0.316764	0.10335	0.659534	0.306714	0.000291914	NR2	rs2512604
GALNT10	5:154182786:G:A	4184	-7948	0.551282	5.47366e-06	-0.411405	0.0877131	0.00449955	0.00770875	0.000237084	NR2	rs10055906
GALNT2	1:230163476:T:C	4166	96237	0.784615	0.00183417	0.359668	0.113668	0.710029	0.320649	0.000183284	NR2	rs4846917
GALNT3	2:165754317:C:T	3947	-39931	0.412821	1.02866e-05	0.508604	0.111945	0.00659934	0.0101639	0.000360096	NR2	rs13406280
GALNT7	4:172774665:A:T	3260	-394147	0.184615	0.00611219	-0.356264	0.128363	0.868513	0.359063	0.000310323	NR2	rs67360313
GAS6	13:114089707:C:A	2919	225630	0.0820513	0.00426923	0.341409	0.117913	0.80112	0.342869	0.000275828	NR2	rs60794079
GCG	2:162339378:A:T	2243	187130	0.0948718	0.0328245	0.351031	0.163172	0.987801	0.389618	0.000533961	NR2	rs13432094
GCNT1	9:76491736:C:G	4651	32553	0.264103	5.03596e-05	-0.409337	0.098465	0.0565943	0.0600963	0.000136206	NR2	rs2093839
GDF15	19:18385187:G:A	3335	-972	0.215385	0.000617278	-0.210093	0.0602474	0.29607	0.188722	0.000230005	NR2	rs34937778
GDF2	10:47380521:C:T	602	58066	0.569231	0.0057084	0.21381	0.0763993	0.443756	0.240915	0.0010318	NR2
GDNF	5:37757585:C:T	3276	-82457	0.0948718	0.000149555	-0.59044	0.152302	0.0673933	0.0686973	0.000330716	NR2	rs62358886
GFAP	17:45851500:C:T	3755	935999	0.138462	0.000104155	-0.481576	0.121255	0.0513949	0.0587266	0.000383514	NR2	.
GFER	16:1709793:A:G	3490	-274401	0.123077	0.00335829	0.343914	0.115655	0.769723	0.337135	0.000239246	NR2	rs17135499
GFRA1	10:116242259:T:C	3020	-30948	0.161538	2.63465e-06	-0.423987	0.0872983	0.00129987	0.00237413	0.000421946	NR2	rs11197603
GFRA2	8:21658974:T:C	4136	-129902	0.476923	0.000167416	0.369287	0.0959974	0.128687	0.106956	0.000186157	NR2	rs2410694
GFRA3	5:137402424:C:T	2359	-872198	0.461538	0.00118147	-0.259639	0.0787383	0.238376	0.160916	0.000603967	NR2	rs1229724
GGH	8:63113775:C:G	3739	74968	0.646154	5.36609e-06	-0.324737	0.0691678	0.00279972	0.0047481	0.000583586	NR2	rs4275222
GGT1	22:24889119:G:A	3082	285925	0.128205	0.00105001	-0.340839	0.102275	0.388461	0.224994	0.000273968	NR2	rs141342555
GGT5	22:24242628:G:A	3602	-2455	0.225641	0.000287863	-0.453955	0.12267	0.173983	0.13209	0.000203489	NR2	rs72617245
GH1	17:64501412:T:G	1623	582572	0.0641026	0.0131239	0.38081	0.15196	0.775622	0.337135	0.000793837	NR2	.
GH2	17:64058916:T:C	1669	176971	0.105128	0.00221794	0.509191	0.163976	0.270173	0.178143	0.000813229	NR2	rs7216747
GHRL	3:11114029:A:G	3310	821081	0.074359	0.00130312	-0.54854	0.167844	0.561444	0.279465	0.000188144	NR2	rs9816179
GKN1	2:68923628:C:T	3470	-51009	0.0692308	0.00265841	0.636807	0.208904	0.654635	0.306164	0.000316861	NR2	rs6752771
GLB1	3:32351709:C:T	3638	-745438	0.0512821	0.0117719	-0.522143	0.205116	0.987801	0.390087	0.000240528	NR2	rs113546740
GLO1	6:38673578:C:T	4210	-29568	0.566667	6.34931e-13	-0.549125	0.0706623	9.999e-05	2.03897e-08	0.000260849	NR2	rs6458065
GLOD4	17:1770499:G:A	3512	988218	0.320513	0.00140935	0.148838	0.0458733	0.665833	0.309025	0.000138421	NR2	rs8080431
GLRX	5:95827733:A:G	3333	5006	0.138462	1.0035e-18	0.848044	0.0853616	9.999e-05	1.36813e-13	0.000260292	NR2	rs17462893
GMPR	6:16586747:A:G	3632	348159	0.0923077	0.000795775	0.377223	0.110496	0.394361	0.227615	0.000200121	NR2	rs171055
GNLY	2:85705880:C:T	3395	11521	0.187179	2.35196e-15	0.816128	0.0937906	9.999e-05	1.28945e-10	0.000339321	NR2	.
GOLM2	15:43815614:C:T	1832	-473106	0.0923077	0.00486634	-0.42412	0.148705	0.442656	0.241596	0.000838762	NR2	rs35302555
GP1BA	17:4910727:A:G	4636	-21551	0.34359	4.90662e-05	0.246717	0.0592541	0.0415958	0.0476215	0.00022487	NR2	rs12939591
GP2	16:20316954:T:C	3625	-10560	0.492308	0.00390061	-0.301417	0.103047	0.776622	0.337135	0.000303411	NR2	rs61670798
GP6	19:55025227:G:A	4240	-13038	0.84359	1.27313e-18	1.01102	0.102148	9.999e-05	1.00402e-13	0.000101293	NR2	.
GPA33	1:167560459:T:C	3721	470081	0.102564	0.00108774	-0.572676	0.172384	0.435656	0.239315	0.000240068	NR2	rs10489192
GPC1	2:240462987:G:A	5230	27323	0.1	0.000174147	0.48126	0.125447	0.160384	0.126346	0.00014063	NR2	rs77418648
GPC5	13:91764804:T:C	3708	366182	0.276923	3.31431e-19	-0.823376	0.0814656	9.999e-05	2.68928e-14	0.000278821	NR2	rs342706
GPNMB	7:23390799:C:T	4447	144023	0.176923	0.000187146	-0.388387	0.101748	0.122688	0.10538	0.000262289	NR2	rs79980740
GPR37	7:124456673:C:A	4373	-309120	0.241026	1.82381e-14	-0.716105	0.0855959	9.999e-05	6.81577e-10	0.000478523	NR2	rs6973149
GRAP2	22:40160112:G:A	2883	259027	0.0871795	0.0069656	-0.460462	0.16862	0.854615	0.354901	0.000409151	NR2	rs11705281
GRN	17:44033724:A:G	3086	-311579	0.0923077	0.00286459	-0.379742	0.125551	0.654335	0.306393	0.000377094	NR2	rs76204283
GRPEL1	4:6940131:C:A	5673	-127934	0.697436	0.000663891	-0.309566	0.0893076	0.594141	0.288724	7.67575e-05	NR2	rs11723716
GSTA1	6:52793393:A:G	4119	-10424	0.361538	2.02087e-08	-0.398972	0.0678384	0.00019998	8.25216e-05	0.000215982	NR2	rs4147614
GSTA3	6:52764200:C:T	4091	-145499	0.607692	3.43675e-05	0.288461	0.0678351	0.0272973	0.0331422	0.000205847	NR2	rs4715316
GUCA2A	1:42274899:G:C	3513	110153	0.669231	0.00393848	-0.219463	0.0751103	0.735426	0.32506	0.000339105	NR2	rs7527222
GUSB	7:64983544:G:C	2666	-998670	0.310256	0.00458337	-0.230872	0.0803877	0.30157	0.191862	0.00154815	NR2	rs35281840
GZMA	5:54718614:C:T	4427	-384033	0.307692	0.000520468	-0.360184	0.10187	0.225777	0.160676	0.000281677	NR2	rs6869164
GZMB	14:24659508:T:A	4444	25317	0.112821	5.95412e-07	-0.668342	0.128931	0.00069993	0.00134636	0.000228544	NR2	rs55964774
GZMH	14:24421804:T:C	4405	-187882	0.928205	0.00394126	-0.51248	0.175408	0.852715	0.35408	0.00023295	NR2	rs4981514
HAGH	16:1817039:T:C	3527	-9787	0.0512821	3.99679e-05	-0.525765	0.124738	0.0265973	0.0326062	0.00025184	NR2	rs11860469
HAO1	20:6944034:G:T	4557	-996425	0.564103	2.79787e-05	-0.337399	0.0784104	0.0207979	0.0266762	0.000225268	NR2	rs6077102
HARS1	5:140507254:A:G	2579	-184117	0.682051	0.0041491	0.246311	0.0847941	0.631537	0.299374	0.000539001	NR2	rs6871703
HAVCR1	5:157000648:G:A	4222	-58469	0.353846	6.39212e-13	0.564885	0.0727011	9.999e-05	1.70974e-08	0.000313326	NR2	rs1501906
HAVCR2	5:157542675:C:T	4324	433630	0.14359	0.00186758	-0.246811	0.0781389	0.570143	0.279626	0.00034072	NR2	rs13355228
HBEGF	5:140033579:G:A	2401	-313025	0.128205	0.000758298	0.199471	0.0581902	0.172883	0.13328	0.000526701	NR2	rs60293875
HBQ1	16:231300:G:A	2186	50840	0.838462	1.1817e-10	0.608618	0.0887996	9.999e-05	6.67927e-07	0.000343082	NR2	rs3760047
HCLS1	3:121609398:T:G	3809	-51506	0.138462	0.0162557	-0.260628	0.107405	0.978702	0.387067	0.000362903	NR2	rs4676737
HDGF	1:156734821:G:A	3125	-16855	0.317949	8.59787e-46	1.09743	0.0562251	9.999e-05	6.9732e-37	0.000342028	NR2	rs61813557
HEXIM1	17:44982393:T:A	4409	-166083	0.0974359	0.00533008	-0.405195	0.143601	0.79782	0.341315	0.000461386	NR2	rs78046226
HGF	7:81831427:A:G	3639	61379	0.0692308	0.00157736	0.373466	0.116331	0.554245	0.276558	0.000234023	NR2	rs111598016
HLA-E	6:31378822:G:A	13285	889312	0.435897	6.73878e-05	-0.281756	0.068998	0.0862914	0.0840534	0.000310401	NR2	.
HMBS	11:120030298:A:G	3662	945416	0.176923	0.00593062	-0.172541	0.0619388	0.916508	0.370948	0.000252535	NR2	rs12574203
HMOX1	22:35541377:G:A	4017	160280	0.205128	0.000213913	-0.403883	0.106812	0.127387	0.106114	0.000211683	NR2	rs9610313
HMOX2	16:5431110:G:A	3649	954711	0.0589744	0.00105182	0.628093	0.1885	0.526847	0.26822	0.00015672	NR2	rs74925442
HNMT	2:138002079:C:T	3792	37605	0.110256	2.82012e-33	-1.23601	0.0823276	9.999e-05	4.79512e-26	0.000316712	NR2	rs11558538
HPCAL1	2:11007859:G:A	5069	704954	0.0564103	0.000685149	0.582	0.168343	0.456654	0.247784	0.000145707	NR2	rs16857022
HPGDS	4:93914924:A:G	3732	-427913	0.5	0.000237161	-0.385988	0.102838	0.110889	0.0988923	0.000294972	NR2	rs2578156
HS3ST3B1	17:15034350:G:T	5454	733268	0.0769231	1.28041e-05	-0.742542	0.16532	0.0151985	0.0213691	0.000108583	NR2	rs72637338
HS6ST1	2:128249719:G:A	4201	-69150	0.153846	0.000458233	0.431545	0.120824	0.217678	0.15755	0.000301972	NR2	rs6742012
HSD11B1	1:210463367:T:A	3971	758520	0.205128	0.000561392	0.423972	0.120643	0.30457	0.190828	0.000252588	NR2	rs12028247
HSPA1A	6:31827773:C:T	12562	12229	0.0589744	6.93722e-05	-0.750796	0.184193	0.10249	0.0935636	0.000305437	NR2	rs6457452
HSPB1	7:76294901:G:T	2711	-7773	0.251282	6.62029e-06	-0.485404	0.104469	0.00449955	0.00732764	0.000370649	NR2	rs2908203
HSPB6	19:34888833:G:A	3211	-868197	0.115385	0.000246564	0.367058	0.0980697	0.120488	0.104971	0.000255785	NR2	rs2651091
HSPG2	1:21885632:C:A	3849	-51679	0.0846154	0.000165722	-0.254469	0.0661036	0.122188	0.105241	0.000227154	NR2	rs28653609
HTRA2	2:74752724:T:C	2968	222790	0.720513	0.00247949	0.320383	0.104348	0.615738	0.294653	0.000266747	NR2	rs3980479
HYAL1	3:49862917:G:A	2074	-440658	0.179487	1.97009e-06	-0.293226	0.0595767	0.00079992	0.00124789	0.00124815	NR2	rs67070774
HYOU1	11:118075976:T:C	3635	-981230	0.746154	0.00141671	-0.239032	0.0737079	0.492651	0.257758	0.000276946	NR2	rs1786189
ICAM1	19:10282558:A:G	3818	11437	0.392308	2.11595e-13	0.366928	0.046112	9.999e-05	3.29824e-09	0.000323109	NR2	rs5030377
ICAM2	17:63979250:G:A	1646	-41384	0.902564	4.65054e-05	-0.597762	0.143103	0.0089991	0.0135328	0.000801673	NR2	rs7211557
ICAM3	19:10346796:T:G	3866	7171	0.351282	2.37339e-05	0.3523	0.0811158	0.0142986	0.0206538	0.000281572	NR2	rs28378712
ICAM4	19:10054997:A:T	3859	-231959	0.525641	0.000677844	0.34274	0.0990489	0.277372	0.180225	0.000294683	NR2	rs8113000
ICAM5	19:10291455:T:C	3866	1502	0.515385	2.86479e-14	0.635858	0.0766885	9.999e-05	6.89047e-10	0.000274774	NR2	rs901886
ICOSLG	21:44240952:C:A	4204	8	0.44359	0.000552511	-0.281449	0.0799847	0.347365	0.209111	0.000202684	NR2	rs2847224
IDUA	4:989272:T:C	3591	2227	0.684615	1.69746e-08	0.611984	0.103451	9.999e-05	8.03203e-05	0.000325309	NR2	rs3796622
IFNG	12:68092204:A:G	3977	-67537	0.364103	0.00243003	-0.316237	0.102786	0.771423	0.337135	0.000170091	NR2	rs7304878
IFNGR1	6:137159612:T:C	3135	-59774	0.0897436	0.000190241	-0.371397	0.0974094	0.09979	0.0905946	0.000268302	NR2	rs9765914
IFNGR2	21:33415005:A:G	3603	11591	0.117949	7.28629e-35	1.52975	0.0982527	9.999e-05	7.51847e-27	0.000232214	NR2	.
IFNLR1	1:23849273:A:G	3323	-338017	0.0897436	0.000749151	0.480762	0.140106	0.308469	0.194565	0.00027289	NR2	rs12404321
IGF1R	15:98166651:C:G	4762	-481889	0.487179	0.000663651	-0.265699	0.0766499	0.464254	0.248735	0.000141825	NR2	rs4965526
IGF2R	6:160073489:C:T	4573	104406	0.171795	5.26955e-09	0.664853	0.10821	9.999e-05	2.56725e-05	0.000251875	NR2	rs2282140
IGFBP1	7:45141849:T:C	4600	-746640	0.133333	0.00147619	-0.374956	0.116067	0.530947	0.268203	0.000289359	NR2	.
IGFBP2	2:217104867:G:C	3416	471446	0.112821	0.00152847	0.314248	0.097594	0.572143	0.279743	0.000210012	NR2	rs3845760
IGFBP3	7:45921476:G:T	4647	203	0.476923	1.07326e-05	0.266543	0.0587962	0.00829917	0.0124681	0.000268116	NR2	rs2854744
IGFBP4	17:41216479:G:A	3076	773028	0.1	0.000877412	-0.269759	0.0796826	0.257174	0.171421	0.000457481	NR2	.
IGFBP6	12:52444038:A:G	4163	-653630	0.612821	0.00152322	-0.13711	0.0425676	0.556544	0.278781	0.000228604	NR2	rs597830
IGFBP7	4:57085087:C:G	4748	-25299	0.846154	0.000295673	-0.375543	0.101683	0.194781	0.145984	0.00018433	NR2	rs10866442
IGFBPL1	9:38409084:G:A	2606	-15371	0.846154	1.19552e-06	0.60639	0.1205	0.00109989	0.0017791	0.000277094	NR2	rs7857243
IGSF3	1:117576014:C:T	3115	908280	0.169231	0.00298069	0.259603	0.0861917	0.658534	0.307566	0.000278737	NR2	rs10923346
IGSF8	1:160184190:A:G	3298	85570	0.241026	0.00127775	-0.245895	0.0751041	0.471553	0.251144	0.000252443	NR2	rs61803840
IL10	1:207707911:G:A	2350	935416	0.602564	0.00141128	0.339743	0.104726	0.387461	0.22583	0.000351871	NR2	rs1570565
IL10RA	11:117420247:G:T	3871	-566148	0.153846	0.00120902	0.485598	0.147571	0.491951	0.256268	0.000188957	NR2	rs11603208
IL10RB	21:33287145:G:C	3569	20777	0.451282	1.85416e-17	0.555715	0.0586375	9.999e-05	2.10931e-12	0.000215604	NR2	rs2850005
IL12A_IL12B	5:159387525:A:C	3881	57037	0.728205	0.00013689	0.363957	0.0933196	0.0866913	0.0808536	0.000236191	NR2	rs10045431
IL12B	5:159387525:A:C	3881	57037	0.728205	8.85628e-06	0.422098	0.0921906	0.0059994	0.0107217	0.000224806	NR2	rs10045431
IL12RB1	19:17784069:C:T	3687	-302866	0.364103	0.00118366	0.320989	0.0973595	0.519248	0.265277	0.000181342	NR2	rs265558
IL15	4:140649868:C:T	3737	-986716	0.0615385	0.00072926	-0.662598	0.19266	0.256974	0.173348	0.000337348	NR2	rs116369997
IL15RA	10:5095912:G:A	5483	-881632	0.117949	0.00212823	0.421205	0.135082	0.862214	0.357995	0.000107345	NR2	rs72774015
IL16	15:81299298:G:A	3767	102418	0.0512821	6.51271e-13	-1.10532	0.142314	9.999e-05	1.40404e-08	0.00020436	NR2	rs4778636
IL17C	16:87882686:G:C	4923	-755887	0.246154	0.000331916	-0.413637	0.11297	0.280372	0.180986	0.00015294	NR2	rs72816308
IL17D	13:20919714:T:C	3916	216014	0.179487	8.37684e-06	0.464277	0.101115	0.00749925	0.00999918	0.000258541	NR2	rs11616283
IL17RA	22:17142947:A:G	2787	57946	0.253846	1.04753e-08	0.513633	0.0854545	9.999e-05	3.407e-05	0.000182176	NR2	rs5747009
IL17RB	3:53839787:A:G	3475	-6782	0.35641	3.01216e-19	0.805603	0.0795903	9.999e-05	3.79804e-14	0.000231056	NR2	rs35518479
IL18	11:111166787:C:G	3289	-997308	0.292308	0.000140049	0.399558	0.102606	0.0573943	0.059986	0.000400432	NR2	rs513498
IL18BP	11:72733538:T:C	3041	734628	0.192308	0.00104144	0.190246	0.0570454	0.29937	0.189156	0.000404467	NR2	rs7123876
IL18R1	2:102373274:A:G	3661	17477	0.774359	9.81283e-32	-1.02215	0.07061	9.999e-05	2.76622e-24	0.000347109	NR2	rs2041740
IL18RAP	2:101567601:T:C	3663	-855560	0.133333	0.00141105	-0.4694	0.14469	0.408759	0.229854	0.000328115	NR2	rs10210185
IL19	1:206581427:G:A	2350	-189347	0.266667	0.00059261	0.352337	0.100701	0.19638	0.145997	0.000369601	NR2	.
IL1R1	2:101966187:A:G	3780	-176560	0.671795	0.000703762	0.26665	0.0773013	0.263674	0.176055	0.000367415	NR2	rs1005193
IL1R2	2:101994530:T:C	4004	2569	0.258974	5.37234e-09	-0.549969	0.0895658	9.999e-05	2.32137e-05	0.000368669	NR2	rs11674595
IL1RAP	3:190616826:C:T	5246	102740	0.838462	4.41974e-26	-1.1188	0.0893873	9.999e-05	4.79964e-20	0.000152498	NR2	rs2161060
IL1RL1	2:102315366:C:G	3730	3802	0.392308	6.13986e-13	-0.624738	0.0803333	9.999e-05	1.41663e-08	0.000352155	NR2	rs13020553
IL1RL2	2:102162001:T:C	3736	-25023	0.54359	4.53519e-05	-0.371402	0.0887791	0.0263974	0.0309221	0.000319167	NR2	.
IL1RN	2:113078588:A:T	3140	-49011	0.733333	6.82372e-06	-0.410972	0.0885839	0.00319968	0.00722425	0.000410819	NR2	rs11123160
IL22RA1	1:24370402:G:A	3336	227261	0.348718	0.000537457	-0.389587	0.11047	0.240476	0.165693	0.000303816	NR2	rs7551707
IL2RA	10:6040595:C:T	5343	-21773	0.107692	1.07911e-11	0.817647	0.112298	9.999e-05	2.27941e-07	0.00012299	NR2	rs11256464
IL32	16:3065110:T:A	2603	-531	0.397436	0.000520398	0.318202	0.0899948	0.220978	0.15755	0.000271609	NR2	rs28372698
IL4R	16:26994048:T:G	3981	-319927	0.0820513	0.000253217	-0.585787	0.156812	0.189081	0.142682	0.000163525	NR2	rs8059250
IL5RA	3:3112912:G:A	5294	2537	0.230769	7.45093e-05	0.421102	0.103773	0.0978902	0.0869696	0.00011078	NR2	rs9809884
IL6	7:23379960:A:G	4398	652759	0.102564	0.00105522	0.411892	0.123651	0.538946	0.274057	0.000166215	NR2	rs439593
IL6R	1:154447611:G:A	2552	42267	0.379487	5.08599e-46	0.73335	0.0374085	9.999e-05	1.86993e-36	0.000351867	NR2	rs61812598
IL6ST	5:56535194:A:G	3824	540230	0.128205	0.000663779	-0.374971	0.108175	0.264074	0.178108	0.000242012	NR2	rs13178412
IL7	8:78695656:C:A	3833	-109808	0.174359	0.00608258	-0.238393	0.0858425	0.834117	0.351072	0.000410993	NR2	rs11993326
IL7R	5:35857602:A:G	3832	710	0.212821	5.5992e-17	-0.838006	0.0900884	9.999e-05	7.80558e-12	0.000244666	NR2	rs11567694
INHBC	12:57285631:G:A	2578	-149154	0.128205	4.9296e-11	-0.749921	0.106956	9.999e-05	3.61901e-07	0.000522046	NR2	rs56205943
INPP1	2:189886437:G:T	2877	-457153	0.364103	0.000668876	0.308393	0.0890243	0.19658	0.148185	0.000439079	NR2	rs256546
INPPL1	11:72283015:T:G	3001	58247	0.215385	0.00302115	0.382851	0.127294	0.578542	0.28409	0.00039913	NR2	rs2508863
IPCEF1	6:154952230:G:A	4512	595426	0.55641	0.00361527	-0.231561	0.0785014	0.869113	0.359063	0.000196813	NR2	rs4870322
IQGAP2	5:75640000:A:G	3899	-763286	0.735897	0.00494852	0.311022	0.109264	0.89721	0.366191	0.000230091	NR2	rs34344
IRAG2	12:26049552:C:T	4608	996845	0.487179	0.000726166	0.387585	0.112655	0.414259	0.232502	0.000172152	NR2	rs7137379
IRAK4	12:43916615:G:A	3695	157663	0.107692	0.00313473	-0.341878	0.114119	0.605039	0.293256	0.000411296	NR2	rs11182327
ISLR2	15:74471808:C:T	2791	341221	0.0974359	0.00565488	0.417559	0.149034	0.79662	0.34172	0.000413239	NR2	rs12441794
ISM1	20:13483102:T:G	3841	261827	0.658974	9.88341e-05	-0.317588	0.079692	0.0619938	0.0637099	0.000243703	NR2	rs2273477
ITGA11	15:68449463:C:T	2703	17299	0.397436	0.00113374	0.293115	0.0885602	0.309569	0.194039	0.000381494	NR2	rs8028117
ITGA5	12:54537771:A:G	3441	118504	0.105128	0.00149303	0.335505	0.103966	0.446855	0.241596	0.000315948	NR2	rs12817091
ITGAM	16:31350667:G:A	1362	90691	0.776923	0.00360656	0.300373	0.101802	0.352265	0.211696	0.00103581	NR2	rs4493054
ITGAV	2:187583029:C:T	3355	992972	0.382051	0.00310234	0.23152	0.0771959	0.40386	0.228093	0.000867506	NR2	rs10187989
ITGB1	10:33410077:C:T	4770	451846	0.0692308	0.000220588	-0.274393	0.0727262	0.130287	0.108238	0.000288521	NR2	rs61845666
ITGB2	21:44255243:G:A	4455	-665657	0.117949	0.000293391	-0.351367	0.0950821	0.215278	0.154311	0.00016414	NR2	rs62226878
ITGB5	3:125697143:A:G	4086	809777	0.261538	0.00582174	0.199006	0.0712784	0.884212	0.363676	0.00034978	NR2	rs138694134
ITGB6	2:160956231:C:T	3993	755958	0.202564	0.00297428	0.33409	0.110897	0.608739	0.292825	0.000462657	NR2	rs13421085
ITGB7	12:53713379:C:G	4036	506127	0.0871795	0.0120711	-0.416051	0.164026	0.989201	0.390278	0.000224535	NR2	rs3741656
ITIH3	3:52797685:C:G	2568	2888	0.389744	6.54938e-08	0.317372	0.0562207	0.00019998	0.000116613	0.000481587	NR2	rs2240919
JAM2	21:25831762:C:G	3662	192503	0.441026	0.000637158	0.186589	0.0536468	0.278572	0.182143	0.000236247	NR2	rs2829932
JCHAIN	4:71078933:C:T	3699	412424	0.148718	0.00180587	-0.470248	0.148391	0.40066	0.227885	0.000491795	NR2	rs72648749
KAZALD1	10:101120727:C:T	2665	58737	0.0871795	4.39803e-06	-0.71064	0.149906	0.00369963	0.00491543	0.000357147	NR2	rs12358230
KDR	4:55108369:A:G	3880	-17227	0.302564	0.000116373	0.324097	0.0822019	0.060294	0.0658994	0.000292238	NR2	rs12507807
KEL	7:143461457:A:T	2342	499093	0.241026	0.000214342	0.431751	0.114199	0.060394	0.0653348	0.000452513	NR2	rs1525119
KIFBP	10:68224349:C:A	4774	-764455	0.817949	0.00225346	-0.447826	0.144445	0.766223	0.336262	0.000191393	NR2	rs2394465
KIR2DL3	19:53879219:G:T	3750	-859295	0.0692308	0.00114017	0.656288	0.198388	0.637036	0.303219	0.000115542	NR2	rs113270767
KIR3DL1	19:54863102:G:A	3749	46633	0.374359	6.67052e-11	-0.668525	0.0960917	9.999e-05	6.59163e-07	0.000120145	NR2	.
KIRREL2	19:34868427:T:A	3212	-988485	0.425641	0.000661481	-0.329742	0.0950995	0.268273	0.178665	0.000252706	NR2	rs4806061
KIT	4:55111794:C:T	3834	453836	0.402564	0.000550124	-0.190824	0.0542111	0.232577	0.161612	0.000234301	NR2	rs2034967
KITLG	12:89119243:T:C	2461	538771	0.205128	0.0011762	0.351177	0.106455	0.254275	0.171421	0.000440416	NR2	rs11105179
KLB	4:39485349:T:A	4439	78418	0.338462	2.89713e-11	-0.667264	0.0938964	9.999e-05	4.09481e-07	0.000238949	NR2	rs10025454
KLK1	19:50823807:G:C	4111	19	0.0564103	0.000317835	-0.806899	0.219658	0.282872	0.182143	0.000118096	NR2	rs36217621
KLK10	19:51006822:T:C	4327	-12888	0.415385	1.89261e-11	0.626189	0.0871891	9.999e-05	2.55562e-07	0.000109638	NR2	rs2569478
KLK11	19:50728142:C:T	4314	-298475	0.771795	0.00204702	0.27338	0.0873348	0.824318	0.348964	0.000112144	NR2	rs7252682
KLK12	19:51031874:A:G	4320	-3129	0.664103	1.38622e-25	-1.09954	0.0890734	9.999e-05	8.69332e-20	0.000119419	NR2	rs3745540
KLK13	19:51035305:G:T	4335	-29788	0.348718	3.07357e-07	-0.49463	0.0928938	0.00029997	0.00102371	0.000124081	NR2	rs3760739
KLK14	19:50625599:A:C	4358	-457289	0.771795	0.000543356	-0.379831	0.107798	0.422658	0.235105	0.000121051	NR2	rs10426057
KLK4	19:50526790:T:C	4339	-384606	0.166667	6.32101e-05	0.536056	0.130752	0.0722928	0.0698008	8.95274e-05	NR2	rs1274696
KLK6	19:50949714:A:G	4331	-19878	0.320513	9.67986e-05	0.303522	0.0760596	0.10049	0.091248	0.000100005	NR2	rs268900
KLK8	19:51002840:G:C	4314	1235	0.0538462	5.1805e-09	-0.927745	0.150917	9.999e-05	3.12291e-05	0.000113681	NR2	rs10404395
KLRB1	12:9744357:G:A	4163	136440	0.4	0.0010394	-0.284114	0.0851771	0.427957	0.235852	0.000298154	NR2	rs10772102
KLRD1	12:10327268:C:T	4593	19397	0.666667	3.39817e-11	-0.668833	0.094495	9.999e-05	3.57514e-07	0.000277352	NR2	rs10772258
KRT18	12:52994499:T:C	4173	45380	0.941026	0.000687866	0.545835	0.157935	0.340466	0.207002	0.000219723	NR2	rs7962778
KRT19	17:40783287:T:C	3437	-745022	0.417949	0.00213536	-0.292568	0.0938588	0.49755	0.256268	0.000388633	NR2	rs62065890
KYAT1	9:128889687:G:A	2711	7736	0.628205	4.68347e-05	-0.33802	0.0809553	0.0209979	0.0270637	0.000303656	NR2	rs9409309
KYNU	2:142851554:T:C	3291	-26111	0.0512821	0.000756457	0.494039	0.144093	0.266273	0.177229	0.000334412	NR2	rs16858115
LACTB2	8:69972809:C:T	3550	-696377	0.805128	0.00273467	-0.3117	0.102555	0.666933	0.309025	0.000258934	NR2	rs6472503
LAG3	12:5853356:C:A	3087	-919165	0.7	0.00313808	0.235386	0.0785811	0.770123	0.337085	0.000228551	NR2	rs10849350
LAIR1	19:54344298:C:A	4187	-20634	0.230769	1.79786e-10	-0.517965	0.0764243	9.999e-05	1.67323e-06	0.000103235	NR2	.
LAIR2	19:54514267:C:T	3974	11435	0.128205	5.09227e-10	-0.902297	0.137002	9.999e-05	3.86859e-06	9.20953e-05	NR2	.
LAMA4	6:111632934:A:G	3165	-621634	0.0692308	5.44063e-05	0.546844	0.13216	0.0235976	0.0322669	0.000343151	NR2	rs75681130
LAMP3	3:183054656:C:G	3447	-108079	0.928205	0.00356595	0.407319	0.137877	0.720928	0.32295	0.000313643	NR2	rs4859269
LAP3	4:16706555:C:T	3804	-870644	0.279487	0.00287189	-0.331459	0.109617	0.683832	0.314351	0.000323345	NR2	rs883275
LAT	16:28012055:C:G	1726	-972998	0.0538462	0.00194398	0.444242	0.141197	0.29647	0.188145	0.000678057	NR2	rs74016604
LAT2	7:73652568:T:A	1437	-557439	0.0564103	4.91873e-05	0.894952	0.214972	0.0151985	0.0180047	0.000504043	NR2	.
LAYN	11:111551492:C:T	3259	10771	0.494872	4.0301e-08	0.297228	0.0517516	9.999e-05	0.000112197	0.000348811	NR2	rs663763
LBP	20:38349567:G:A	3212	3084	0.0666667	4.47453e-07	0.695531	0.13261	0.00029997	0.000763151	0.000300963	NR2	rs1739654
LBR	1:225837587:G:A	3753	409548	0.148718	0.00954727	-0.235009	0.0896748	0.935806	0.375819	0.000391841	NR2	rs10915885
LCN2	9:127401674:A:T	2077	-747780	0.528205	0.00306237	-0.155315	0.0517151	0.490751	0.255846	0.000456092	NR2	rs10987636
LDLR	19:11604074:G:A	3152	514610	0.120513	0.00112669	0.348364	0.105194	0.371663	0.218748	0.00033396	NR2	rs56276180
LEFTY2	1:225850913:A:T	3625	-90308	0.4	2.56759e-12	-0.468198	0.0621668	9.999e-05	5.41276e-08	0.000336667	NR2	rs360061
LEP	7:129105633:A:T	3494	864354	0.0564103	0.0114039	-0.331809	0.12976	0.956804	0.380848	0.000334924	NR2	rs73467288
LEPR	1:65521766:A:G	3542	101097	0.264103	0.000241105	0.372421	0.0993413	0.115288	0.100118	0.0003372	NR2	rs1171276
LGALS1	22:37683232:G:A	3225	7595	0.425641	0.000849587	0.233577	0.0688034	0.383762	0.224071	0.000206464	NR2	rs5756763
LGALS3	14:55274019:T:C	3910	144766	0.0820513	2.37758e-10	-0.8083	0.120169	9.999e-05	1.51573e-06	0.000284141	NR2	rs113563539
LGALS4	19:39346065:T:C	3805	533119	0.0692308	0.00555528	-0.391107	0.139295	0.886911	0.36454	0.000277816	NR2	rs57411196
LGALS7_LGALS7B	19:39000905:A:T	3786	211704	0.879487	0.000909493	0.43104	0.127719	0.368463	0.21819	0.000272125	NR2	rs2081994
LGALS8	1:236596664:G:T	4133	72681	0.712821	8.00014e-23	0.954446	0.0838434	9.999e-05	3.08602e-17	0.000182702	NR2	.
LGALS9	17:27631065:A:G	1969	-124	0.261538	1.15475e-07	-0.367791	0.0665206	9.999e-05	0.000166682	0.000497939	NR2	rs3751092
LGMN	14:92787880:C:G	3981	39252	0.0538462	6.61677e-05	-0.751563	0.183838	0.0518948	0.056567	0.000228552	NR2	rs76392320
LHB	19:49690690:A:G	3686	673598	0.0666667	0.00187883	-0.636814	0.201729	0.647535	0.305272	0.000199128	NR2	rs45492293
LHPP	10:124469341:A:G	4671	7517	0.133333	1.79195e-08	0.647804	0.109704	9.999e-05	8.11354e-05	0.000158924	NR2	.
LIFR	5:37669897:G:C	3669	-886750	0.0487179	0.00309936	-0.611872	0.203996	0.732327	0.32561	0.000247547	NR2	rs9283746
LILRA2	19:54573515:A:G	3841	-276	0.14359	3.59253e-31	-1.09814	0.0769008	9.999e-05	2.04066e-24	0.000101021	NR2	.
LILRA5	19:54316893:G:A	4208	3726	0.230769	6.68845e-10	-0.58659	0.0897568	9.999e-05	4.097e-06	0.000116972	NR2	.
LILRB1	19:54308642:G:A	3855	-321843	0.207692	9.52798e-08	-0.486342	0.0873377	0.00019998	0.000322462	0.000112626	NR2	.
LILRB2	19:54279064:C:T	4247	-2047	0.0871795	5.85647e-21	-1.20573	0.112378	9.999e-05	1.43631e-15	0.000107408	NR2	.
LILRB4	19:54540202:A:G	3864	-122784	0.807692	0.00045395	0.384925	0.107692	0.376862	0.220384	0.000106372	NR2	.
LILRB5	19:54255803:T:C	4279	-1471	0.55641	1.35671e-46	-1.18093	0.0595851	9.999e-05	2.42127e-38	9.42251e-05	NR2	rs10405357
LPCAT2	16:54650770:A:G	3960	-858303	0.0974359	8.24705e-05	-0.626312	0.15534	0.059694	0.0620092	0.000191322	NR2	rs16953815
LPL	8:19989069:C:A	5877	49815	0.115385	2.71798e-08	-0.74834	0.128531	9.999e-05	0.000191292	0.000130634	NR2	rs139894713
LPO	17:57604241:G:A	2715	-634344	0.0846154	0.000792465	-0.56262	0.164744	0.333467	0.201133	0.000274955	NR2	rs72834922
LRIG1	3:66394273:A:C	4466	-106750	0.333333	1.84115e-19	-0.926171	0.0908172	9.999e-05	4.49792e-14	0.000180835	NR2	rs17775391
LRP1	12:57807992:G:A	2147	679508	0.0641026	0.00833454	0.466756	0.174911	0.775122	0.337135	0.000500481	NR2	rs61938185
LRP11	6:149622577:C:A	4746	-241783	0.428205	8.42801e-23	0.687403	0.060427	9.999e-05	1.02388e-16	0.000186672	NR2	rs9322197
LRPAP1	4:3499799:G:C	3319	-32624	0.0717949	1.62133e-06	-0.79411	0.159938	0.00159984	0.00296179	0.000204983	NR2	rs114634328
LRRC25	19:18438074:T:C	3326	40451	0.323077	0.000171505	-0.308133	0.080234	0.106989	0.0928831	0.000189199	NR2	rs2303696
LRRN1	3:3765908:T:C	5105	-33524	0.351282	5.38851e-32	0.943204	0.0647515	9.999e-05	2.96491e-25	0.000121613	NR2	rs6801789
LSP1	11:2186647:T:C	4670	333562	0.789744	0.000119406	-0.386122	0.0981008	0.114289	0.100118	0.000142633	NR2	rs61871274
LTA	6:31512356:C:T	10267	-59934	0.0871795	8.33781e-21	-1.45262	0.136076	9.999e-05	6.92064e-14	0.000263094	NR2	.
LTBP2	14:74448842:G:A	3549	-163396	0.374359	0.000109124	-0.221544	0.0559531	0.0571943	0.0607435	0.000308212	NR2	rs12587259
LTBP3	11:65575510:A:G	2354	17150	0.212821	6.65787e-06	-0.438561	0.0944145	0.00289971	0.00554225	0.000604483	NR2	rs67924081
LTBR	12:6389496:A:G	3511	5333	0.635897	4.34687e-10	-0.371317	0.0561301	9.999e-05	2.16493e-06	0.000208656	NR2	rs10849449
LXN	3:158821505:G:A	3732	148856	0.433333	0.00043946	-0.342428	0.0955589	0.132287	0.109696	0.000534383	NR2	rs1548092
LY6D	8:142806152:G:T	4794	19612	0.612821	3.18279e-11	0.503535	0.071024	9.999e-05	4.09481e-07	0.000212691	NR2	rs11774823
LY75	2:159905297:T:C	3972	540	0.382051	5.58743e-39	1.02261	0.0600528	9.999e-05	2.62895e-29	0.000407108	NR2	rs3806603
LY9	1:160789262:A:G	3083	-6913	0.225641	8.21912e-11	0.629485	0.0909722	9.999e-05	7.95902e-07	0.000217916	NR2	rs12405457
LY96	8:73773169:G:T	3494	-218224	0.807692	0.000496987	-0.372756	0.105037	0.232777	0.161055	0.000238987	NR2	rs2046180
LYN	8:56762717:C:A	4082	882881	0.261538	0.00545726	0.344914	0.122581	0.870313	0.359063	0.000326655	NR2	rs66499242
LYPD3	19:43455236:G:A	3187	-10373	0.205128	3.65349e-08	0.582253	0.101032	0.00019998	7.91838e-05	0.000390501	NR2	rs35681564
LYPD8	1:248771492:T:C	2122	15732	0.0871795	6.17903e-08	0.948293	0.167633	9.999e-05	9.53846e-05	0.000701299	NR2	.
MAD1L1	7:1312497:T:C	4651	-920449	0.8	0.000280233	0.321278	0.0866454	0.222378	0.15755	0.00017449	NR2	rs12666808
MANF	3:50481961:T:C	1649	-903331	0.551282	0.00214804	0.2443	0.0784203	0.224578	0.160132	0.00104356	NR2	rs736471
MANSC1	12:13169237:A:C	3693	818994	0.0435897	0.0021476	-0.559051	0.179451	0.767223	0.337135	0.000161266	NR2	rs74063254
MAP2K6	17:68480832:G:A	3616	-933866	0.0820513	0.000591807	-0.629317	0.179845	0.244076	0.166783	0.000242903	NR2	rs79093081
MAP4K5	14:51252678:C:T	3683	720108	0.0410256	0.00111922	0.791229	0.238781	0.464954	0.248735	0.000257262	NR2	rs7157008
MAPK9	5:179441443:C:T	4273	-850641	0.135897	6.99444e-05	0.616523	0.151329	0.0693931	0.0700916	0.000146795	NR2	rs79102775
MARCO	2:118983428:C:T	3475	41233	0.230769	2.6757e-08	-0.460935	0.0791251	9.999e-05	8.02384e-05	0.000305737	NR2	rs6751745
MASP1	3:187261980:A:G	4310	-29758	0.358974	6.50709e-05	-0.392546	0.0959199	0.0747925	0.0707062	0.000133874	NR2	rs1357134
MATN2	8:97978993:A:G	2933	109928	0.664103	1.77292e-07	0.477506	0.0877748	0.00019998	0.000333064	0.000238356	NR2	rs1869609
MATN3	2:20020375:T:G	4462	7706	0.384615	6.65001e-11	0.58199	0.0836468	9.999e-05	6.19927e-07	0.000210476	NR2	rs1191804
MAVS	20:4740876:A:G	4372	894041	0.0871795	9.96626e-06	-0.665156	0.146162	0.0122988	0.0164296	0.000152241	NR2	rs2422937
MB	22:36220845:A:G	3750	603515	0.705128	0.00242865	0.262062	0.0851723	0.710129	0.32168	0.000209947	NR2	rs132754
MCAM	11:118876060:T:G	3567	-441071	0.584615	0.000820751	-0.161046	0.047298	0.368563	0.215351	0.000228616	NR2	rs4938576
MCFD2	2:46914826:A:G	4460	-981	0.202564	1.17813e-06	0.511185	0.101516	0.00219978	0.00358117	0.000132835	NR2	rs62140549
MDGA1	6:37704146:T:G	4059	6262	0.492308	3.99565e-45	-1.08353	0.0562299	9.999e-05	2.62267e-36	0.00021759	NR2	rs6937280
MDK	11:46675592:C:T	2208	293922	0.151282	0.000807213	-0.316416	0.0927973	0.215878	0.154311	0.000485338	NR2	rs57744667
MEGF10	5:127287611:T:A	2959	-3186	0.5	2.36522e-08	0.447527	0.0765009	9.999e-05	4.92832e-05	0.000309315	NR2	rs6869632
MEGF9	9:120606049:G:A	2655	-108422	0.715385	1.74919e-07	0.410158	0.075356	0.00039996	0.000312054	0.00035032	NR2	rs4837785
MEP1B	18:32217995:T:C	3203	27955	0.469231	1.97392e-43	-1.16348	0.0624076	9.999e-05	9.80869e-35	0.000342538	NR2	rs680321
MEPE	4:87824524:C:T	3844	-8446	0.166667	0.00153421	-0.314178	0.0976066	0.528247	0.266024	0.000285038	NR2	rs28464861
MERTK	2:112013221:T:C	2629	114613	0.620513	0.000230538	-0.306483	0.0814888	0.0916908	0.0866813	0.000371149	NR2	rs4500955
MESD	15:81321721:G:A	3718	331901	0.189744	0.00297789	0.319527	0.106077	0.79522	0.341315	0.000218436	NR2	rs35192917
MET	7:117552706:A:C	2522	880509	0.0666667	0.000188453	0.551942	0.144667	0.0552945	0.0580723	0.0005394	NR2	rs739378
METAP1D	2:171449638:G:A	3750	-550316	0.279487	0.000855122	0.364617	0.107463	0.353665	0.21075	0.000283341	NR2	rs17220440
METAP2	12:95371460:A:G	5271	-102693	0.684615	0.000143205	-0.229243	0.0589583	0.132587	0.111161	0.000158685	NR2	rs6538627
MFAP5	12:9591967:C:T	2894	929140	0.0692308	0.000174825	-0.570852	0.148841	0.0762924	0.0748757	0.000335875	NR2	rs4542498
MFGE8	15:88918765:T:G	3559	5385	0.307692	0.000134757	0.304113	0.0778929	0.0752925	0.0753041	0.00022387	NR2	rs7171119
MGLL	3:127740872:G:A	3601	-81644	0.0769231	0.00104424	0.476958	0.14305	0.373963	0.218496	0.000295976	NR2	rs60152513
MGMT	10:129505249:A:G	4777	38007	0.641026	2.04166e-12	0.593841	0.0784373	9.999e-05	2.42095e-08	0.000129738	NR2	rs1762416
MIA	19:40762338:A:G	3127	-13184	0.0538462	5.12257e-17	1.4558	0.156266	9.999e-05	5.46636e-12	0.000273547	NR2	rs2607412
MICB_MICA	6:31410610:T:C	10284	-87536	0.353846	5.03522e-40	-1.06881	0.0614124	9.999e-05	2.20105e-28	0.000285254	NR2	.
MIF	22:23953099:T:C	3624	58715	0.523077	1.88133e-11	-0.332516	0.046292	9.999e-05	2.11124e-07	0.00021904	NR2	rs2739330
MILR1	17:64468504:G:A	2191	19388	0.0564103	0.000221954	0.702122	0.186175	0.0612939	0.0653348	0.000495858	NR2	.
MITD1	2:100127879:G:T	2833	946820	0.146154	0.000384966	0.424631	0.117288	0.0954905	0.0897003	0.0006569	NR2	rs80133484
MLN	6:33806617:C:A	5499	2613	0.210256	2.95198e-06	-0.481498	0.0996655	0.00369963	0.00627368	0.000223444	NR2	rs2894342
MME	3:155992831:G:C	2941	912511	0.746154	0.00605886	-0.29528	0.106276	0.739826	0.326006	0.000507243	NR2	rs12488133
MMP1	11:103693040:T:C	4803	894879	0.479487	1.12268e-05	-0.325369	0.0719413	0.0089991	0.0133395	0.000239432	NR2	rs11225976
MMP10	11:102779693:C:T	4816	-936	0.0923077	0.000249582	-0.580567	0.155251	0.141786	0.117371	0.00026469	NR2	rs486055
MMP12	11:102875061:T:C	4812	78	0.148718	9.31671e-12	-0.871599	0.119285	9.999e-05	1.38219e-07	0.000233754	NR2	.
MMP3	11:102842889:T:C	4812	-721	0.551282	2.97771e-14	0.47566	0.0574119	9.999e-05	1.27732e-09	0.000248968	NR2	.
MMP7	11:102537474:G:C	4961	6726	0.487179	0.000126438	0.311397	0.0794181	0.0787921	0.0764975	0.000334114	NR2	rs7128808
MMP8	11:102761648:C:G	4886	36693	0.158974	0.000264797	-0.378494	0.101652	0.147385	0.118487	0.00025863	NR2	rs11225415
MMP9	20:45424352:G:A	3670	-584557	0.574359	0.00406327	0.223784	0.0768576	0.826217	0.349161	0.00021345	NR2	rs13217
MNDA	1:158609130:G:C	4222	-222222	0.238462	0.000963353	-0.282723	0.0841941	0.40096	0.229854	0.000204184	NR2	rs12083184
MOG	6:29731044:T:C	8298	73951	0.223077	7.22939e-06	0.389524	0.0842046	0.00529947	0.0106914	0.000578827	NR2	.
MPIG6B	6:31915902:C:T	11967	192528	0.0538462	0.00270978	0.415479	0.136569	0.874213	0.361556	0.000269497	NR2	.
MPO	17:58288745:T:G	2715	7809	0.179487	2.32341e-05	0.444227	0.10216	0.0115988	0.0195764	0.000296627	NR2	rs7215408
MSLN	16:760593:C:A	3306	-142	0.14359	2.008e-09	0.743004	0.117402	9.999e-05	1.14957e-05	0.000215236	NR2	rs2235503
MSMB	10:46046324:T:C	1531	54	0.507692	1.64445e-28	0.857416	0.06419	9.999e-05	1.30613e-21	0.000983332	NR2
MSR1	8:15975718:T:G	6206	-216934	0.85641	0.0001927	-0.359943	0.0944906	0.192581	0.14332	0.000178526	NR2	rs1080226
MSRA	8:9958840:C:T	6102	-95453	0.630769	0.00254238	0.267793	0.0874445	0.80332	0.34172	0.000276002	NR2	rs2684002
MSTN	2:189524434:A:T	2885	-538296	0.0717949	0.000210074	-0.560338	0.147998	0.069593	0.0707062	0.000533832	NR2	rs74798997
MUC13	3:124309450:A:G	4214	-625302	0.0589744	0.00523466	-0.560463	0.198202	0.868713	0.359063	0.000329178	NR2	rs111357017
MVK	12:109539659:T:G	2928	-34136	0.382051	0.0015502	-0.226632	0.0704775	0.413159	0.232494	0.000405038	NR2	rs10466917
MYOC	1:171652996:G:A	4302	307	0.0974359	2.84078e-07	-0.689377	0.129065	0.00019998	0.000640647	0.000335286	NR2	rs1490185
MZB1	5:139439484:T:C	2047	49570	0.635897	2.55364e-05	0.423899	0.098004	0.0079992	0.0117893	0.000546854	NR2	rs3923059
NAAA	4:76067417:A:G	4855	126403	0.228205	4.99242e-10	-0.710827	0.10787	9.999e-05	3.61834e-06	0.000278109	NR2	rs28564530
NADK	1:1901262:C:T	2774	122791	0.438462	1.16554e-08	0.444226	0.0741649	9.999e-05	3.46868e-05	0.000274867	NR2	rs4648730
NBL1	1:20500538:A:G	4588	856226	0.3	0.000304911	0.270487	0.0734054	0.230577	0.160843	0.000178575	NR2	rs531651
NBN	8:89398217:C:G	2680	-586451	0.241026	0.0249747	0.23812	0.105304	0.958804	0.380848	0.000611	NR2	rs34011839
NCAM1	11:113105212:C:T	3430	143791	0.14359	0.000420009	-0.271798	0.0755815	0.154585	0.12467	0.00031404	NR2	.
NCAM2	21:21463626:A:G	5002	465216	0.397436	5.69913e-11	0.542362	0.0776417	9.999e-05	6.3573e-07	0.000210545	NR2	rs2826851
NCAN	19:18815877:C:T	3197	-396082	0.389744	0.000987366	-0.260857	0.0778505	0.330567	0.200523	0.000356164	NR2	rs8103912
NCF2	1:183286097:G:A	3416	-304363	0.553846	0.0024965	-0.232231	0.0756903	0.534247	0.273177	0.000361317	NR2	rs685575
NCR1	19:54901304:C:A	3881	-4845	0.146154	1.05931e-06	-0.539151	0.106577	0.00119988	0.00294259	0.000123041	NR2
NCS1	9:130988383:A:G	3677	815978	0.374359	0.000148672	0.27941	0.0720438	0.121888	0.103644	0.000166034	NR2	rs12005819
NDRG1	8:133442227:G:A	4888	144974	0.720513	0.000659057	-0.375875	0.108372	0.407159	0.230151	0.000131244	NR2	rs4736453
NDUFS6	5:2255761:G:A	5499	454353	0.0769231	0.000607643	0.741075	0.212241	0.50405	0.26057	0.000110294	NR2	rs72712950
NECTIN2	19:44857967:G:A	3594	11669	0.384615	7.49004e-07	-0.311911	0.0607515	0.00029997	0.00144879	0.000205452	NR2	rs440277
NECTIN4	1:160910190:G:A	3176	-179369	0.0564103	1.23139e-05	-0.517896	0.115067	0.00729927	0.0122367	0.000282838	NR2	rs35043048
NEFL	8:25368745:G:A	3530	412132	0.115385	0.00774297	0.356724	0.132405	0.914009	0.370948	0.000280176	NR2	rs17198394
NELL1	11:20943239:T:C	4645	273652	0.0897436	7.63611e-05	0.604327	0.149157	0.0794921	0.0769057	0.000111505	NR2	rs74578408
NELL2	12:45257487:C:G	2629	381171	0.102564	0.000269121	-0.408415	0.109818	0.0677932	0.0660908	0.000556239	NR2	rs11182951
NFASC	1:204976361:C:A	3775	147708	0.141026	1.29792e-06	0.5343	0.106557	0.00189981	0.00255095	0.000197894	NR2	rs6693024
NFATC1	18:78397854:G:A	4640	-998077	0.0589744	0.012567	0.528187	0.209445	0.9963	0.391311	0.000204273	NR2	rs75877148
NID1	1:236620491:G:C	4047	555400	0.141026	0.000519502	0.263978	0.0746488	0.259974	0.17481	0.000231032	NR2	rs594911
NID2	14:52026350:G:A	4547	-42710	0.55641	1.42234e-09	0.358904	0.0561319	9.999e-05	1.16552e-05	0.000210736	NR2	rs2749870
NME3	16:1960180:G:C	3575	188636	0.697436	0.0247194	0.210525	0.0929341	0.9994	0.391879	0.000257249	NR2	rs397460
NMNAT1	1:10572178:C:T	2738	628702	0.271795	0.000471148	0.319188	0.0895626	0.249875	0.168732	0.000217105	NR2	rs4846235
NOMO1	16:15217798:G:A	1837	384076	0.579487	0.00108466	-0.296526	0.089236	0.253575	0.170176	0.000474585	NR2	rs201635590
NOS1	12:117520416:C:T	3838	158789	0.682051	0.000378949	0.36277	0.100081	0.262674	0.176039	0.000163872	NR2	rs1068932
NOS3	7:151860786:G:A	4310	869768	0.197436	0.000797865	0.393097	0.115171	0.451855	0.244665	0.000166695	NR2	rs35721560
NOTCH1	9:137139979:C:T	3001	593930	0.0820513	0.000111352	0.457363	0.115665	0.0774923	0.0748757	0.000181009	NR2	rs2301363
NOTCH3	19:14946301:T:G	5158	-254695	0.230769	0.000874141	-0.255359	0.0754047	0.484452	0.253972	0.000178187	NR2	rs10411044
NPDC1	9:136989496:T:C	2718	-56682	0.725641	0.000838027	-0.265678	0.0781671	0.332567	0.200982	0.000264238	NR2	rs10781529
NPPB	1:11782087:C:G	2880	-76859	0.54359	0.00012046	-0.360567	0.0916618	0.0662934	0.0657953	0.000238756	NR2	rs10864542
NPPC	2:231193779:A:G	3201	-732618	0.341026	0.000713708	0.230051	0.0667695	0.29587	0.187525	0.000293795	NR2	rs2368563
NPTN	15:74256432:G:A	2770	623042	0.284615	0.00553047	-0.340953	0.121367	0.782722	0.3372	0.00036085	NR2	rs9783698
NPTX1	17:80532122:C:T	4335	55514	0.0461538	1.28262e-05	0.912888	0.203264	0.0119988	0.0186553	0.000145758	NR2	rs62067239
NPTXR	22:38790353:G:A	2993	-53676	0.112821	0.000127965	0.439276	0.112122	0.0677932	0.0662971	0.000305574	NR2	rs55952902
NPY	7:25177810:T:A	4832	893619	0.841026	0.00186355	-0.310641	0.0983261	0.683232	0.314053	0.000239762	NR2	rs12673428
NRCAM	7:107484547:A:C	3342	-971890	0.528205	0.000321728	0.254369	0.0693089	0.112189	0.100515	0.000369502	NR2	rs2712192
NRP1	10:33196550:G:T	4368	-138118	0.420513	1.96449e-07	-0.298626	0.05511	0.00019998	0.000501596	0.000293827	NR2	.
NRP2	2:205160539:G:C	3030	-521963	0.712821	0.00103523	0.245137	0.0734655	0.430757	0.238193	0.000286604	NR2	rs1347305
NSFL1C	20:1627375:T:G	4355	160525	0.433333	0.000404461	0.21395	0.0593214	0.336066	0.206055	0.000105092	NR2	rs4471947
NT5C3A	7:33076434:A:G	4205	13657	0.674359	0.0018659	-0.285559	0.090398	0.535546	0.271483	0.000317919	NR2	rs10244526
NT5E	6:85489515:A:G	4518	39431	0.735897	1.04533e-07	-0.529004	0.0953251	0.00019998	0.000256603	0.000457249	NR2	rs2229523
NTF3	12:5345988:G:A	4039	-86121	0.210256	0.000753604	0.376501	0.109776	0.432957	0.238724	0.000148753	NR2	rs17722372
NTF4	19:48376654:T:G	3565	-688165	0.194872	0.000887876	-0.444318	0.131379	0.394861	0.227603	0.000204049	NR2	rs34118929
NTRK2	9:84172961:A:G	3523	-496769	0.841026	0.0107023	-0.260177	0.100846	0.974903	0.386737	0.000264348	NR2	rs2246117
NTRK3	15:87956384:C:G	3574	-300356	0.338462	2.36186e-05	-0.287621	0.0662058	0.0184982	0.022776	0.000201412	NR2	rs56272184
NUB1	7:151987899:G:A	4192	646086	0.174359	0.000147288	-0.516867	0.133186	0.125287	0.103855	0.000146862	NR2	rs62480038
NUCB2	11:17269663:T:C	3569	-7077	0.641026	4.87711e-19	-0.644099	0.0641083	9.999e-05	8.19375e-14	0.00027439	NR2	.
NUDC	1:26045653:A:G	2321	-876091	0.830769	0.00702008	0.259432	0.0950965	0.755224	0.333128	0.000524198	NR2	rs6686190
NUDT5	10:11894341:C:T	4598	-301551	0.728205	0.00249276	-0.203919	0.0664525	0.872413	0.360922	0.00013702	NR2	rs10906035
NXPH1	7:7562242:A:G	5500	-871368	0.751282	0.00153819	0.405934	0.126144	0.763524	0.335157	0.000149503	NR2	rs12702620
OBP2B	9:133210436:G:A	4458	1185	0.75641	6.74247e-15	0.72027	0.0844423	9.999e-05	2.78014e-10	0.000148526	NR2	rs3761822
ODAM	4:70255964:C:A	4512	60238	0.715385	0.0110303	-0.310813	0.120981	0.936106	0.375244	0.000411422	NR2	rs2046106
OGFR	20:63334624:G:A	4740	529788	0.628205	0.00274409	-0.222652	0.0732825	0.880612	0.363254	0.000125131	NR2	rs6011757
OGN	9:92293147:A:T	3705	-111432	0.358974	1.27477e-17	0.512229	0.0537139	9.999e-05	1.57249e-12	0.000380822	NR2	rs10820966
OLR1	12:10137739:A:G	4706	-34394	0.133333	8.82079e-05	0.441912	0.110077	0.0518948	0.0582159	0.000271126	NR2	rs12304486
OMD	9:93052250:A:G	3716	627778	0.0410256	0.00301025	-0.557447	0.185274	0.662534	0.307258	0.000377873	NR2	rs60706725
[truncated: 2,727 more rows]

## Sheet: S Table 3
S Table 3. Annotation of all independent cis-pQTLs across contexts (n = 1629) with RegulomeDB. (pre-calculated score file for dbSNP v153 https://www.regulomedb.org/regulome-search/).
Abbreviations: phenotype_id = HGNC symbol of the tested protein; variant_id = chr:hg38pos:ref.allele:alt.allele; rsid = unique variant identifier; context = context of pQTL mapping; ranking = likelihood of a variant being functional (1a = eQTL/caQTL + TF binding + matched TF motif + matched Footprint + chromatin accessibility peak, 1b = eQTL/caQTL + TF binding + any motif + Footprint + chromatin …
phenotype_id	variant_id	rsid	context	ranking	probability_score
AGRN	1:1025561:G:C	rs3121554	NR1	1b	0.9275
AGRN	1:1032846:C:A	rs3121560	PR2	1f	0.55436
AMY2B	1:103374968:T:G	rs4310475	NR2	7	0.51392
AMY2B	1:103493407:T:C	rs4344361	NR2	7	0.51392
AMY2B	1:103497405:T:A	rs4244372	NR1	1f	0.84
SORT1	1:109275684:G:T	rs629301	NR1	1f	0.55436
CSF1	1:109988373:G:C	rs3768480	PR2	1e	0.969
SORT1	1:110108400:A:C	rs17025455	PR1	1f	0.55436
PROK1	1:110450727:G:A	rs1857512	PR1	1b	0.84
ANGPTL7	1:11052779:T:C	rs1884429	NR1	1b	0.68148
ANGPTL7	1:11114010:A:T	rs1148478	PR1	1b	0.14
DRAXIN	1:11669605:T:C	rs9430594	NR2	5	0.58955
DRAXIN	1:11676475:G:A	rs28924112	PR2	2b	0.50526
DRAXIN	1:11692083:G:A	rs6679089	NR1	1f	0.55436
TNFRSF1B	1:12182401:T:C	rs6697733	NR1	4	0.60906
ACP6	1:147641588:C:T	rs10494247	NR2	1f	0.55436
ACP6	1:147652507:T:G	rs2153463	NR1	1f	0.55436
ACP6	1:147656899:A:G	rs12119079	PR1	7	0.51392
CA14	1:150257055:G:A	rs17646887	PR1	1f	0.55436
SF3B4	1:150585817:T:A	rs112175941	NR1	1b	0.96
CTSS	1:150723181:T:C	rs11584575	PR1	1f	0.55324
CTSS	1:150743306:G:A	rs12089989	NR1	1b	0.72857
CTSS	1:150746126:T:G	rs75056606	NR2	6	0.67105
CTSS	1:150751271:T:C	rs3768018	PR2	7	0.51392
CTSS	1:150752859:G:T	rs1532770	NR2	1f	0.4475
TNFRSF4	1:1511945:G:A	rs6690515	NR2	1f	0.55436
CRNN	1:151500534:C:A	rs72710170	PR1	1f	0.22271
CRNN	1:152419091:G:A	rs10494275	PR1	1f	0.55436
S100A16	1:153428633:A:G	rs3014823	PR1	5	0.23589
S100A4	1:153544696:T:C	rs1050923	PR1	1f	0.55436
S100A4	1:153547505:C:G	rs73026350	NR1	1f	0.55436
S100A4	1:153557755:T:A	rs28689606	PR2	1f	0.55324
EPHA2	1:15410646:G:A	rs79280654	NR2	1f	0.55436
IL6R	1:154422290:A:G	rs12047973	NR2	1b	1
IL6R	1:154427173:C:T	rs12023358	NR1	1b	0.57517
CTRC	1:15443606:C:A	rs10803384	NR1	1d	0.948
CTRC	1:15443607:G:A	rs545634	PR2	1d	0.95796
IL6R	1:154439152:A:G	rs61812594	PR1	1f	0.22271
IL6R	1:154447611:G:A	rs61812598	PR2	1f	0.55324
IL6R	1:154455807:A:G	rs12133641	PR1	1b	0.86517
EFNA1	1:154549772:A:G	rs11265634	PR1	1f	0.55436
PKLR	1:154855684:C:T	rs2878412	NR1	1f	0.66703
ADAM15	1:155060832:G:A	rs11589479	PR1	1f	0.22271
ADAM15	1:155061442:C:T	rs41264285	PR2	1f	0.70823
EFNA1	1:155133578:A:G	rs4390169	NR1	1f	0.55436
EFNA1	1:155157915:G:A	rs4971079	NR2	1f	0.55436
EFNA1	1:155158424:C:T	rs4644481	PR2	1f	0.55436
PKLR	1:155228980:A:G	rs112270735	NR2	1f	0.55324
SCAMP3	1:155259431:G:A	rs9729564	PR2	1b	0.43117
SCAMP3	1:155350701:T:A	rs12049455	PR1	1f	0.76
HDGF	1:155961577:G:A	rs4661175	PR1	1f	0.55436
BCAN	1:156192003:T:C	rs2842875	PR1	1f	0.55324
HDGF	1:156572426:C:T	rs78317021	NR1	1f	0.55436
HDGF	1:156582928:T:G	rs6688600	NR1	1f	0.66703
HDGF	1:156730859:T:G	rs12145743	PR1	7	0.51392
HDGF	1:156734821:G:A	rs61813557	NR1	1f	0.22271
FCRL5	1:157544014:G:A	rs11264761	PR2	7	0.51392
FCRL5	1:157545568:A:G	rs6683511	NR2	7	0.18412
FCRL5	1:157558612:G:A	rs9659670	PR1	7	0.51392
FCRL5	1:157570314:T:G	rs7523341	NR1	1f	0.55436
FCRL3	1:157696854:T:C	rs6681271	PR1	7	0.51392
FCRL3	1:157698600:T:C	rs7522061	NR1	7	0.51392
FCRL3	1:157699203:C:T	rs2210913	PR2	7	0.51392
FCRL3	1:157699488:C:T	rs3761959	NR2	1f	0.22271
FCRL2	1:157709901:C:T	rs17676303	PR2	7	0.51392
FCRL2	1:157766308:A:G	rs112537702	NR1	6	0.84138
FCRL2	1:157795174:C:T	rs1016849	PR1	1f	0.55324
FCRL1	1:157802090:C:T	rs4971154	NR1	1f	0.22271
FCRL1	1:157809392:T:A	rs4971155	PR1	5	0.87
NADK	1:1590682:T:C	rs6681422	PR2	1d	0.95699
FCRL6	1:159803847:A:G	rs6659704	PR1	1f	0.55436
FCRL6	1:159824724:G:A	rs2494495	NR1	6	0.09571
FCRL6	1:160379411:G:C	rs11581815	PR2	1f	0.93
CD84	1:160502054:A:G	rs2050523	NR2	7	0.51392
CD48	1:160684968:C:G	rs2295615	PR1	4	0.60906
CD48	1:160704830:A:G	rs9628658	PR2	1f	0.22271
CD48	1:160705554:C:G	rs352677	NR2	1f	0.55436
CD48	1:160708931:T:G	rs352680	NR1	1f	0.55436
SLAMF7	1:160740367:G:A	rs2295616	NR1	1d	0.89517
SLAMF7	1:160744058:T:C	rs17313034	PR2	1f	0.55436
CD48	1:160774019:A:G	rs529346	NR1	4	0.60906
LY9	1:160789262:A:G	rs12405457	NR1	1b	0.35
LY9	1:160789729:T:C	rs1333065	PR2	2b	0.64885
LY9	1:160791495:G:A	rs10797086	PR1	4	0.60906
CD244	1:160855463:C:T	rs4656937	NR2	1f	0.55436
NECTIN4	1:160910190:G:A	rs35043048	NR2	1f	0.55436
CD244	1:160934145:A:C	rs12080285	PR2	1b	0.98
FCGR2A	1:161495630:A:G	rs12722986	PR1	1f	0.38917
FCGR2B	1:161499264:G:C	rs6658353	PR1	1f	0.55436
FCGR2A	1:161506415:A:G	rs9427398	NR1	1b	0.37667
FCGR2B	1:161509069:T:C	rs4657041	PR2	1b	0.31571
FCGR2B	1:161509955:A:G	rs1801274	NR2	1f	0.55436
FCGR2A	1:161525250:C:T	rs1079109	NR2	1f	0.55436
FCGR3B	1:161627387:C:G	rs35139848	NR2	7	0.51392
FCGR3B	1:161647551:C:T	rs1771577	PR1	1b	0.19833
FCGR3B	1:161647576:A:C	rs1771576	NR1	1f	0.55436
FCRLB	1:161707114:T:C	rs1340977	NR2	1f	0.70823
FCRLB	1:161714831:T:G	rs2333749	NR2	1f	0.55436
FCRLB	1:161718641:T:C	rs7549830	PR1	1f	0.55436
FCRLB	1:161727282:G:C	rs72704099	PR2	1f	0.55436
FCRLB	1:161733735:C:T	rs6699725	PR2	1b	0.63925
XCL1	1:168544005:G:A	rs1933114	NR1	1f	0.22271
XCL1	1:168544108:A:T	rs3820411	PR1	1f	0.22271
XCL1	1:168545940:C:T	rs3916568	NR1	1f	0.55436
XCL1	1:168558662:C:T	rs11580138	PR1	7	0.51392
XCL1	1:168569580:T:C	rs12062199	PR2	1f	0.55436
DPT	1:168693808:G:A	rs11801503	PR1	1f	0.55436
DPT	1:168719600:A:C	rs11582481	NR1	4	0.60906
DPT	1:168727311:G:C	rs567067	NR1	1f	0.22271
DPT	1:168738519:A:G	rs494189	NR2	1f	0.55436
DPT	1:168744803:G:T	rs6675239	PR1	7	0.51392
SELP	1:169557863:T:C	rs9332575	NR1	1b	0.7225
SELP	1:169594713:T:G	rs6136	NR2	1f	0.55436
SELP	1:169636817:T:C	rs12025263	PR1	6	0.20075
MYOC	1:171480732:G:A	rs12119596	PR1	1f	0.55324
MYOC	1:171633236:G:A	rs79520137	PR1	5	0.13454
MYOC	1:171645230:T:C	rs7523603	NR1	1b	0.955
MYOC	1:171652996:G:A	rs1490185	NR2	1f	0.55436
MYOC	1:171656537:G:T	rs2220556	PR2	4	0.60906
MYOC	1:171656940:T:G	rs10913408	PR2	7	0.51392
TNR	1:175616367:T:C	rs2179158	NR1	7	0.18412
ANGPTL1	1:178859463:T:G	rs12125050	NR1	1f	0.55436
NADK	1:1901262:C:T	rs4648730	NR2	1f	0.55436
NADK	1:1905586:C:T	rs2803290	NR1	1f	0.55436
PLA2G2A	1:19979653:G:C	rs11573156	PR1	1f	0.55436
CHI3L1	1:203137165:T:C	rs4950922	NR2	1f	0.55436
CHI3L1	1:203186754:G:C	rs4950928	PR1	1f	0.55436
CHI3L1	1:203189101:T:C	rs946262	NR1	1f	0.55436
CHIT1	1:203218965:G:A	rs2244783	NR1	7	0.51392
CHIT1	1:203222738:C:T	rs2486067	PR1	1f	0.08
CHIT1	1:203227714:C:T	rs56035601	PR1	5	0.23589
NFASC	1:204975977:G:A	rs72753409	PR1	4	0.70497
NFASC	1:204976188:T:C	rs6656887	PR2	1f	0.55436
NFASC	1:204976361:C:A	rs6693024	NR1	1f	0.55436
CNTN2	1:205054884:C:T	rs1572995	PR1	1f	0.22271
CNTN2	1:205255630:A:G	rs1172149	PR1	1f	0.55436
PM20D1	1:205829185:G:T	rs823084	NR1	4	0.60906
PM20D1	1:205843784:A:G	rs7518979	PR1	5	0.13454
PM20D1	1:205845357:G:A	rs1104899	PR1	1f	0.55436
PM20D1	1:205849244:T:C	rs57904872	NR1	6	0.124
PM20D1	1:205943731:C:T	rs1342063	PR2	1f	0.55436
PM20D1	1:205943945:T:C	rs1342064	PR1	1f	0.55436
PFKFB2	1:207058406:A:T	rs2808454	PR1	1f	0.22271
PFKFB2	1:207077111:C:T	rs1060287	PR2	1f	0.22271
C4BPB	1:207079820:A:G	rs3748672	NR1	1b	0.82368
IL19	1:207098927:T:A	rs72468029	PR2	7	0.51392
CD55	1:207199596:G:C	rs4844574	NR2	7	0.51392
CD55	1:207230999:T:C	rs57003024	PR2	6	0.49716
CD55	1:207238567:T:C	rs11580394	NR1	1f	0.55324
CD55	1:207291479:A:T	rs2802230	PR1	7	0.51392
HSPG2	1:21878013:C:T	rs747546	NR1	5	0.58955
LEFTY2	1:225850913:A:T	rs360061	NR2	1f	0.66703
LEFTY2	1:225886863:T:G	rs360057	PR2	1f	0.55436
LEFTY2	1:225889531:A:G	rs1877726	PR1	1f	0.55436
LEFTY2	1:225892974:T:C	rs1223244	PR1	1f	0.59917
LBR	1:225967162:G:C	rs74148404	PR2	4	0.60906
C1QA	1:22635031:C:T	rs680123	PR1	4	0.60906
GALNT2	1:230171476:T:G	rs4846923	PR2	4	0.60906
GALNT2	1:230189055:G:A	rs641038	NR1	5	0.13454
LGALS8	1:236582456:A:G	rs2853591	PR1	1f	0.55324
LGALS8	1:236588889:C:T	rs768948	NR1	1f	0.66703
LGALS8	1:236596339:A:G	rs4233464	PR2	6	0.28784
LGALS8	1:236596664:G:T	rs2758163	NR2	7	0.51392
NID1	1:236620491:G:C	rs594911	NR1	7	0.51392
FUCA1	1:23843968:C:T	rs10917430	NR1	1f	0.55324
IL22RA1	1:24141941:G:C	rs2502451	PR1	1a	0.87733
IFNLR1	1:24199645:G:T	rs12046369	NR1	1f	0.55436
LYPD8	1:248771492:T:C	rs12044252	NR2	1f	0.55436
LYPD8	1:248799929:T:C	rs4512688	NR1	1f	0.22271
TNFRSF14	1:2572795:C:A	rs6671426	PR1	7	0.51392
ATP5IF1	1:28257988:G:A	rs12408077	NR1	1b	0.37667
TXLNA	1:31731046:C:G	rs909001	PR1	1f	0.55436
RSPO1	1:37544462:A:G	rs71640737	NR1	5	0.64596
RSPO1	1:37601951:G:T	rs10752600	PR1	5	0.612
RSPO1	1:37630757:G:A	rs61776214	PR2	1f	0.55436
TIE1	1:43301597:T:C	rs6690243	PR2	1f	0.22271
TIE1	1:43682497:T:C	rs4660257	PR1	7	0.51392
PCSK9	1:55251601:A:G	rs12029058	PR1	7	0.51392
TACSTD2	1:58525165:A:G	rs7544032	PR1	1f	0.22271
TACSTD2	1:58552794:G:A	rs11589214	PR1	6	0.07
TACSTD2	1:58553972:C:T	rs672359	NR2	7	0.51392
TACSTD2	1:58575047:T:C	rs232840	NR2	1b	0.99
TACSTD2	1:58575905:A:G	rs3551	NR1	1f	0.55436
ANGPTL3	1:62541171:A:C	rs1781221	PR1	1f	0.55324
ANGPTL3	1:62766879:G:A	rs12084633	NR2	7	0.51392
ROR1	1:63727526:T:C	rs13374611	NR2	5	0.58955
ROR1	1:64141300:T:G	rs1359295	NR1	1f	0.55324
ROR1	1:64148328:T:C	rs6588083	NR2	1f	0.55436
ROR1	1:64152474:G:A	rs1359296	PR2	1f	0.83785
ROR1	1:64177594:C:T	rs7527017	NR2	1f	0.55436
LEPR	1:65660087:G:A	rs10789192	PR2	7	0.51392
PARK7	1:7962111:C:T	rs226250	PR2	1f	0.66703
PARK7	1:7973777:G:A	rs12563704	PR1	1f	0.55324
CCN1	1:86410790:G:A	rs145220513	PR2	5	0.13454
CA6	1:8974539:A:G	rs3765963	PR1	1b	0.895
DNMBP	10:100829577:C:A	rs11190719	NR2	1f	0.55436
KAZALD1	10:101120727:C:T	rs12358230	NR2	1f	0.55436
PNLIPRP2	10:115675914:G:A	rs10885766	NR1	5	0.13454
GFRA1	10:116242259:T:C	rs11197603	NR1	4	0.60906
PNLIPRP2	10:116635040:G:C	rs2286779	PR1	1f	0.55436
PNLIPRP2	10:116638373:A:G	rs4751995	NR1	1f	0.55324
PNLIPRP2	10:116641866:C:T	rs74158811	PR2	5	0.58955
NUDT5	10:12147713:T:G	rs10906086	PR2	6	0.78165
LHPP	10:124469067:C:T	rs9630117	PR2	1f	0.55436
LHPP	10:124469341:A:G	rs11245061	NR1	1f	0.55436
LHPP	10:124469789:A:G	rs11245064	PR1	1f	0.66703
LHPP	10:124516220:A:G	rs12773190	NR1	1f	0.22271
MGMT	10:129505249:A:G	rs1762416	NR2	6	0.37269
MGMT	10:129645726:A:G	rs11016853	PR1	1f	0.22271
MGMT	10:129646763:G:A	rs12241533	PR2	5	0.58955
MGMT	10:129707928:C:T	rs1803965	NR2	1f	0.55436
MGMT	10:129709309:C:T	rs12764295	NR1	1f	0.55436
MGMT	10:129748277:G:C	rs12359181	PR2	1f	0.0985
MGMT	10:129764672:G:A	rs28427056	PR1	1f	0.22271
MGMT	10:129770564:C:A	rs10829628	NR2	1f	0.22271
MGMT	10:129773039:G:A	rs12146263	NR1	1b	0.92754
ADAM8	10:132805694:G:T	rs7901426	PR1	1f	0.55436
ADAM8	10:133269306:C:T	rs2995310	PR1	1f	0.55436
CDNF	10:14878103:T:G	rs12259906	NR1	1b	1
CDNF	10:14899056:T:G	rs7896464	NR2	1f	0.22271
NRP1	10:33188502:G:C	rs2506148	PR1	4	0.60906
NRP1	10:33194380:G:A	rs2506150	PR2	3a	0.71345
NRP1	10:33196550:G:T	rs2247015	NR1	1f	0.55436
NRP1	10:34080089:C:T	rs10827323	PR1	5	0
RET	10:42843993:A:G	rs2744091	PR1	1f	0.55436
RET	10:42857446:T:C	rs2795507	PR2	1f	0.55324
RET	10:42867619:G:A	rs788284	NR2	1f	0.22271
RET	10:42929412:T:A	rs788280	NR2	1f	0.22271
RET	10:42939990:C:T	rs788267	NR1	1f	0.55436
CXCL12	10:44283379:T:A	rs111537293	NR1	2b	0.43292
ASAH2	10:50246241:G:T	rs2842124	PR1	7	0.51392
ASAH2	10:50246248:A:G	rs1369862	PR1	7	0.51392
ASAH2	10:50247994:C:A	rs1436218	PR2	1f	0.22271
DKK1	10:52652733:A:C	rs1159798	PR2	4	0.60906
IL15RA	10:5955857:C:T	rs3136630	PR1	1f	0.55436
IL2RA	10:5995763:C:T	rs7911500	PR2	7	0.51392
IL2RA	10:6018470:C:T	rs12722588	NR2	1f	0.55436
IL2RA	10:6021356:C:T	rs7093069	PR1	1f	0.55436
IL2RA	10:6037381:T:C	rs11256442	NR1	1f	0.55436
IL2RA	10:6038831:C:G	rs11256457	NR2	1f	0.55324
IL2RA	10:6040595:C:T	rs11256464	NR1	1f	0.55324
IL2RA	10:6053965:C:A	rs12722497	PR1	1f	0.66703
PBLD	10:68276805:C:T	rs12246624	PR1	6	0.16
PBLD	10:68279014:G:A	rs78041174	PR2	1f	0.22271
PBLD	10:68296578:A:C	rs7912806	NR1	1f	0.08
VSIR	10:70910685:C:G	rs7914224	NR1	4	0.60906
VSIR	10:71763954:C:T	rs12415269	NR1	1f	0.55436
VSIR	10:71862340:T:C	rs11818858	PR2	1b	0.57517
PLAU	10:73749515:C:T	rs10824031	NR1	7	0.51392
SFTPA2	10:79558907:C:G	rs17886395	PR1	1f	0.22271
SFTPA2	10:79610769:C:A	rs4253509	NR1	1f	0.55436
SFTPD	10:79925837:C:T	rs2256462	PR2	2b	0.76166
SFTPD	10:79939482:G:A	rs2245121	PR1	1f	0.55436
SFTPD	10:79946568:A:G	rs721917	NR1	1f	0.08
SFTPD	10:79947615:G:A	rs7074156	PR2	1f	0.05
SFTPD	10:79952684:C:T	rs1885550	PR1	1f	0.55436
SFTPD	10:79956537:G:A	rs144420336	PR1	1b	0.99542
SFTPD	10:80001645:G:T	rs10887328	NR1	6	0.07634
SNCG	10:86960032:C:G	rs760113	PR2	1f	0.55436
SNCG	10:86962641:A:T	rs9864	PR1	1f	0.55436
SNCG	10:86966227:A:G	rs1240390	NR1	1b	0.97205
SNCG	10:86966969:C:G	rs12778826	PR1	1f	0.66703
SNCG	10:87016482:T:A	rs192170212	NR2	6	0.2225
PIK3AP1	10:96669837:G:A	rs7920142	PR2	1f	0.55436
ADM	11:10217939:G:A	rs1115454	PR1	7	0.51392
MMP7	11:102545128:G:A	rs938595	PR1	1f	0.55436
MMP3	11:102798678:T:C	rs1144393	PR2	1f	0.22271
MMP3	11:102800966:C:T	rs534191	PR1	1f	0.22271
MMP1	11:102802517:A:T	rs484915	NR2	1f	0.55436
MMP3	11:102834166:A:G	rs595840	PR2	1f	0.55436
MMP3	11:102842889:T:C	rs679620	NR2	7	0.51392
MMP3	11:102845590:A:G	rs645419	NR1	1f	0.07
MMP12	11:102848803:C:T	rs114176245	PR1	7	0.51392
MMP12	11:102851883:G:A	rs72981683	PR2	1f	0.55436
MMP12	11:102875061:T:C	rs2276109	NR2	1a	0.94
MMP1	11:103693040:T:C	rs11225976	NR2	6	0.22795
LAYN	11:111309665:C:A	rs11213825	NR2	1f	0.70823
LAYN	11:111551492:C:T	rs663763	PR2	1f	0.55436
LAYN	11:111552561:G:T	rs679032	PR1	1f	0.22271
PTS	11:112131163:C:T	rs575159	PR2	1f	0.62128
TMPRSS5	11:113673391:G:T	rs4938033	NR2	1f	0.66703
TMPRSS5	11:113681890:C:G	rs1533053	PR1	1f	0.55436
TMPRSS5	11:113926424:T:C	rs1176748	NR2	1f	0.72917
ARHGEF12	11:119351996:G:A	rs7122785	PR1	1f	0.22271
THY1	11:119370410:A:G	rs514808	NR2	1b	0.89
ARHGEF12	11:120033009:C:T	rs61897924	PR2	1f	0.55436
CRTAM	11:122868010:T:C	rs17126930	NR1	7	0.51392
CRTAM	11:122890217:C:T	rs61910305	PR2	1f	0.55324
CLMP	11:123190479:C:G	rs2002871	PR1	1f	0.66703
CLMP	11:123192617:A:G	rs7129640	NR2	1f	0.22271
CLMP	11:123195788:A:G	rs4429068	PR2	1f	0.55436
ADAMTS8	11:130406182:A:G	rs7930976	PR2	5	0.13454
ADAMTS15	11:130849763:C:T	rs6590513	NR2	7	0.51392
ADAMTS8	11:131177096:C:A	rs74702593	PR1	1f	0.55436
SPON1	11:14001115:C:T	rs1609342	NR2	1f	0.08
SPON1	11:14045253:T:G	rs4757219	NR1	1f	0.19549
SPON1	11:14055495:A:T	rs2697820	PR1	7	0.51392
NUCB2	11:17269663:T:C	rs214099	NR1	1f	0.55436
NUCB2	11:17269952:G:T	rs214097	PR1	7	0.51392
NELL1	11:20935979:T:C	rs16907072	NR1	1f	0.39417
CD59	11:33699873:C:G	rs831614	PR2	1f	0.55436
PAMR1	11:35553947:G:A	rs59100957	NR2	1b	0.66917
PAMR1	11:35601733:T:C	rs61879622	PR1	1f	0.22271
CDHR5	11:517431:G:A	rs115507748	PR2	1f	0.55436
CD5	11:60389011:G:A	rs12793970	PR2	1f	0.55436
CD6	11:61008737:C:T	rs11230563	PR1	1f	0.55436
CD6	11:61009309:T:C	rs2074227	PR2	1f	0.55436
CDHR5	11:620599:G:T	rs7932167	NR1	1f	0.55436
CDHR5	11:620927:A:C	rs12360820	PR1	1f	0.55436
SCGB1A1	11:62308754:G:A	rs12574012	NR1	7	0.51392
SCGB1A1	11:62419714:C:T	rs10897271	PR1	1f	0.55436
SMPD1	11:6389167:T:C	rs1542705	NR2	1f	0.66703
SMPD1	11:6394233:G:A	rs1050239	NR1	1f	0.55436
CDHR5	11:648715:C:A	rs4074376	NR2	1f	0.55436
LTBP3	11:65575510:A:G	rs67924081	NR2	1f	0.55436
CDHR5	11:659479:G:A	rs72844744	PR1	1f	0.55436
B4GAT1	11:66322561:C:A	rs10219183	NR2	1f	0.55436
B4GAT1	11:66334507:G:A	rs10896110	PR1	1f	0.55436
B4GAT1	11:66349640:C:T	rs10896113	PR2	1f	0.55436
EPS8L2	11:695854:C:T	rs7945422	PR1	1f	0.66703
EPS8L2	11:703175:A:G	rs7107522	PR2	1f	0.55436
EPS8L2	11:706284:G:T	rs11246276	NR2	1b	0.37667
FOLR3	11:71327781:G:A	rs78096534	PR1	1f	0.55436
FOLR3	11:72145571:C:T	rs146694036	NR1	1f	0.55436
FOLR3	11:72159189:C:T	rs7939902	NR2	1f	0.55436
FOLR3	11:72169574:C:G	rs116475746	PR1	1f	0.22271
FOLR3	11:72255538:A:C	rs628542	NR1	1f	0.22271
FOLR2	11:72607431:C:G	rs90409	NR1	1b	0.895
RELT	11:73259518:G:A	rs11235699	PR2	1f	0.55436
RELT	11:73392790:G:C	rs1002127	NR2	1a	0.97
RELT	11:73404269:A:G	rs7114009	NR1	1f	0.55436
RELT	11:73413781:A:G	rs11235743	PR1	7	0.51392
CHRDL2	11:74684605:G:C	rs4944058	NR2	1f	0.22271
CTSC	11:88286908:A:G	rs190057	PR2	1f	0.39752
CTSC	11:88291841:C:T	rs72964941	PR1	1f	0.22271
CTSC	11:88298064:C:T	rs217113	NR1	1b	0.932
CTSC	11:88320811:T:C	rs217053	NR2	1f	0.55436
CTSC	11:88327331:T:C	rs217062	PR2	1b	0.98667
CTSC	11:88371133:T:C	rs72968617	NR2	1f	0.67
CTSC	11:88390564:T:A	rs61901734	NR1	1b	0.46817
CTSC	11:88391676:A:G	rs2512323	PR1	1f	0.07
CNTN5	11:99178378:A:C	rs12364368	NR2	1f	0.22271
CNTN5	11:99183045:A:G	rs12146429	NR1	7	0.51392
CNTN5	11:99184351:G:T	rs10892860	NR1	1f	0.68
CNTN5	11:99454436:G:A	rs2656185	NR2	1f	0.55324
CLEC7A	12:10118488:A:C	rs16910526	PR1	7	0.51392
CLEC7A	12:10138597:C:T	rs76523286	NR1	1f	0.75833
CLEC7A	12:10170639:G:A	rs117397291	PR1	2b	0.88523
KLRD1	12:10318451:A:G	rs12303914	PR1	1b	0.92
KLRD1	12:10318718:C:G	rs12813197	NR1	1b	0.71
KLRD1	12:10327268:C:T	rs10772258	NR2	1f	0.55324
SELPLG	12:108574117:G:A	rs112632298	NR2	1f	0.55436
PXN	12:120151048:A:G	rs4503602	PR2	1f	0.55436
PXN	12:120196486:T:C	rs7978656	PR1	1a	0.88667
PXN	12:120224174:T:C	rs4767884	NR1	1f	0.55436
PXN	12:120229296:G:T	rs3845191	NR2	1f	0.55436
PRKAB1	12:120398546:T:A	rs206970	PR1	1f	0.22271
PSMD9	12:121883793:A:G	rs7309105	PR1	1f	0.55436
FKBP4	12:3219896:G:T	rs113000770	PR1	5	0.13454
CNTN1	12:40666283:A:C	rs4548696	NR1	7	0.51392
CNTN1	12:40677277:G:A	rs11177750	PR2	7	0.51392
CNTN1	12:40783720:G:A	rs12582249	NR2	6	0.12357
CNTN1	12:40854941:T:G	rs312271	PR2	1f	0.22271
NELL2	12:45132577:C:T	rs2098553	NR1	1f	0.22271
ACVRL1	12:51908034:C:A	rs3782479	PR2	4	0.60906
ACVRL1	12:51920060:C:T	rs74094825	NR1	5	0.04578
ACVRL1	12:51941030:C:T	rs116863940	PR1	1b	0.69
CALCOCO1	12:53715875:C:T	rs3741659	NR1	1f	0.55436
CALCOCO1	12:53723808:G:A	rs10783596	NR2	1f	0.22271
CALCOCO1	12:53734942:T:C	rs12228894	PR2	1f	0.55436
VWF	12:5437687:G:T	rs117653207	PR1	4	0.60906
CALCOCO1	12:54516708:C:A	rs3825193	NR2	6	0.58046
INHBC	12:57285631:G:A	rs56205943	PR2	6	0.0495
INHBC	12:57445390:G:T	rs61352607	PR1	1f	0.55436
LTBR	12:6381713:G:A	rs3759327	PR2	1f	0.22271
LTBR	12:6389496:A:G	rs10849449	NR2	1f	0.55436
WIF1	12:64218152:C:T	rs790016	PR2	1f	0.55324
CD27	12:6442708:G:C	rs3136549	NR2	1f	0.55436
WIF1	12:64906763:G:C	rs7976491	PR1	7	0.51392
PTPN6	12:6760337:C:T	rs61230147	NR2	2b	0.77392
LAG3	12:6776063:G:A	rs4764620	PR2	1f	0.55436
CD4	12:6785283:T:C	rs10774447	NR2	1f	0.22271
RBP5	12:7094298:G:A	rs6488561	NR1	1f	0.55436
RBP5	12:7135290:A:C	rs6488452	PR2	1f	0.67
RBP5	12:7140835:G:A	rs79253787	PR1	1f	0.55436
CLEC4C	12:7747588:C:T	rs10845821	NR1	1f	0.55436
CLEC4C	12:7760079:A:G	rs12310416	PR1	7	0.51392
CLEC6A	12:8464475:T:C	rs4303299	NR2	1f	0.22271
CLEC6A	12:8492654:C:A	rs112719587	PR1	1f	0.22271
CLEC6A	12:8507324:C:T	rs7138795	PR2	7	0.51392
CLEC4D	12:8535216:A:G	rs10841847	NR1	1f	0.22271
CLEC4D	12:8540247:C:T	rs10841856	NR2	1f	0.1
CLEC4D	12:8545495:G:T	rs10841871	PR1	7	0.51392
CLEC1B	12:9942242:A:G	rs4764108	PR2	1d	0.96769
CLEC1B	12:9971934:T:C	rs1797526	NR2	7	0.51392
CLEC1B	12:9995251:T:C	rs521040	NR1	6	0.34
F7	13:113098850:T:C	rs2181540	PR2	1f	0.55436
F7	13:113110921:G:A	rs2774033	NR1	1f	0.66703
F7	13:113115325:T:G	rs493833	PR1	1b	0.63094
IL17D	13:20729945:G:A	rs9509356	NR1	1b	0.51695
IL17D	13:20919714:T:C	rs11616283	NR2	6	0.2677
TNFRSF19	13:23602414:C:T	rs9553014	NR1	5	0.58955
PCDH17	13:57606775:A:G	rs17573038	PR2	2b	0.68144
SLITRK6	13:85345741:A:G	rs9531773	NR2	7	0.51392
GPC5	13:91398149:A:G	rs3759452	NR2	1b	0.776
GPC5	13:91405002:G:A	rs1330064	PR2	1f	0.55324
GPC5	13:91409624:G:A	rs9523330	PR1	7	0.51392
GPC5	13:91764804:T:C	rs342706	PR1	1f	0.55436
WARS	14:100379120:C:A	rs12882934	PR1	1f	0.22271
DLK1	14:100706787:A:C	rs17099623	NR1	1b	0.776
DLK1	14:100715444:A:G	rs4905998	PR2	1f	0.55436
APEX1	14:20456995:T:G	rs1130409	PR2	1f	0.55436
ANG	14:20674854:G:A	rs4981311	PR1	7	0.51392
ANG	14:20676896:T:C	rs11629118	NR2	1f	0.11
ANG	14:20684445:C:A	rs28589501	NR1	1b	0.9
ANG	14:20688145:G:A	rs8008227	PR2	1f	0.55436
ANG	14:20690751:G:T	rs17114699	NR1	5	0.04578
RNASE3	14:20948264:T:C	rs2783800	PR2	5	0.23889
GZMB	14:24586146:G:A	rs11621703	PR1	6	0.23502
GZMB	14:24659508:T:A	rs55964774	NR2	6	0.14931
NID2	14:52021048:T:C	rs2516600	PR1	1f	0.55436
NID2	14:52024937:T:C	rs1497077	NR1	6	0.17297
NID2	14:52026350:G:A	rs2749870	NR2	1f	0.55436
LGALS3	14:55119869:T:C	rs8007620	PR1	1f	0.0985
LGALS3	14:55182042:G:C	rs77478035	PR2	7	0.51392
LGALS3	14:55274019:T:C	rs113563539	PR1	1d	0.825
LGALS3	14:55395805:A:G	rs76264591	NR1	7	0.51392
FUT8	14:65277732:T:C	rs61987841	NR1	1f	0.66703
FUT8	14:65327634:T:C	rs2127869	NR1	1f	0.22271
FUT8	14:65350469:A:G	rs946917	PR2	7	0.51392
FUT8	14:65366781:C:T	rs10149004	NR2	1b	0.86517
FUT8	14:65370785:C:T	rs8020305	PR1	1f	0.25685
FUT8	14:65475424:C:A	rs72714447	NR1	1f	0.55324
SMOC1	14:69880110:G:C	rs4902761	PR2	1f	0.55436
SMOC1	14:69888141:A:C	rs1958078	NR2	1f	0.55436
ENTPD5	14:73948850:G:A	rs118139038	PR2	1f	0.55436
ENTPD5	14:74007693:T:C	rs117818304	NR1	1f	0.55436
FLRT2	14:85309633:G:A	rs12895071	NR2	1f	0.55324
FLRT2	14:85324244:G:T	rs10145942	NR1	6	0.81321
FLRT2	14:85397499:A:G	rs1957331	PR1	7	0.51392
FLRT2	14:85566809:T:C	rs11159710	PR2	1f	0.55436
FLRT2	14:85606802:T:G	rs2747001	PR1	6	0.044
FLRT2	14:85609613:G:T	rs2753615	NR1	5	0.13454
FLRT2	14:85615776:G:A	rs12432364	NR2	5	0.13454
FLRT2	14:85632958:A:G	rs2224413	PR2	4	0.60906
SERPINA9	14:94431297:G:A	rs10132253	PR2	1f	0.22271
SERPINA11	14:94446462:G:A	rs12888805	PR1	1f	0.55436
SERPINA11	14:94446806:G:A	rs12893359	PR2	1f	0.22271
SERPINA9	14:94454993:G:C	rs11846230	NR2	1f	0.21
SERPINA11	14:94456095:T:C	rs2093235	NR1	1b	0.35082
SERPINA9	14:94462135:T:C	rs7152610	PR2	1b	1
SERPINA9	14:94464679:T:G	rs8020984	PR1	1f	0.66703
SERPINA9	14:94474987:G:T	rs74696650	PR2	1b	1
SERPINA9	14:94482954:C:T	rs2038499	PR1	1f	0.70823
SERPINA12	14:94515198:T:A	rs8006968	NR1	1f	0.03154
SERPINA12	14:94517387:A:G	rs76624128	NR2	4	0.60906
SERPINA12	14:94521214:T:A	rs61978271	PR2	5	0
SERPINA12	14:94527267:C:T	rs12434602	PR1	7	0.18412
SPINT1	15:40755579:T:C	rs35673728	PR2	1f	0.55436
SPINT1	15:40902226:G:A	rs62020568	NR1	1f	0.79
SPINT1	15:40930289:G:C	rs12441495	NR2	1f	0.55436
TYRO3	15:41517007:G:A	rs11070332	PR2	1f	0.22271
TYRO3	15:41588265:T:C	rs11635790	PR2	7	0.51392
TYRO3	15:41588421:A:G	rs8025212	PR1	1f	0.55324
TYRO3	15:41588515:T:G	rs8026760	NR2	1f	0.55436
TYRO3	15:41590185:A:C	rs1819454	NR2	6	0.17585
TYRO3	15:41780332:C:G	rs1105881	NR1	1f	0.70823
SNAP23	15:42072439:G:T	rs55912424	NR1	5	0.13454
SCG3	15:51424510:G:A	rs2459401	NR2	6	0.1574
SCG3	15:51654049:T:G	rs2606141	NR1	1f	0.26975
SCG3	15:51674514:A:G	rs2606139	PR1	1f	0.23917
SCG3	15:51683411:G:A	rs2305710	PR1	6	0.37351
PRTG	15:55709576:C:T	rs7162371	NR1	1f	0.55436
PRTG	15:55735815:G:T	rs11630141	PR2	1f	0.66703
CA12	15:63455423:C:G	rs8035085	NR1	1b	0.37667
CD276	15:73701156:A:G	rs28640136	PR1	1b	0.49233
CD276	15:73701848:C:T	rs899271	PR2	1f	0.55324
CD276	15:73711192:G:A	rs966378	NR1	1f	0.37886
PPCDC	15:74968696:A:T	rs78068354	NR2	1f	0.19549
PPCDC	15:74974150:C:T	rs12908078	NR1	1f	0.55436
PPCDC	15:74986899:T:G	rs7179097	PR1	1f	0.55436
PPCDC	15:74995481:C:A	rs12911421	PR1	1a	1
PPCDC	15:75000359:G:A	rs112025779	PR1	1f	0.55436
PPCDC	15:75032736:A:C	rs10659441	NR2	1f	0.76667
PPCDC	15:75034413:C:G	rs28394281	NR2	1b	1
PPCDC	15:75043832:T:A	rs3816261	NR1	1f	0.55436
PPCDC	15:75662694:C:T	rs12902444	NR1	1f	0.55436
CTSH	15:78936857:A:G	rs12592898	NR2	1b	0.9845
CTSH	15:78938395:G:T	rs62013200	NR1	1f	0.55436
CTSH	15:78938704:G:T	rs62013227	PR1	1f	0.55436
CTSH	15:78942615:G:A	rs34593439	PR1	1f	0.21667
CTSH	15:78944473:G:A	rs11072817	PR1	1f	0.66703
CTSH	15:78964936:G:A	rs3759858	NR1	1f	0.19549
IL16	15:81298434:G:C	rs17875509	PR1	4	0.60906
IL16	15:81299298:G:A	rs4778636	NR2	4	0.60906
IL16	15:81305769:C:T	rs17875532	PR2	4	0.60906
IL16	15:81307465:C:T	rs17875543	NR1	4	0.60906
NTRK3	15:87956384:C:G	rs56272184	NR2	5	0.13454
MFGE8	15:88910557:G:A	rs3784752	PR1	1f	0.55436
MFGE8	15:88912537:C:G	rs34239095	PR2	1f	0.55436
MFGE8	15:88918765:T:G	rs7171119	NR1	1b	0.36991
ANPEP	15:89815788:G:T	rs28565347	NR1	1b	0.40021
IGF1R	15:99577110:A:C	rs11247113	PR1	7	0.51392
IGF1R	15:99579966:C:T	rs59812744	PR2	1f	0.22271
TPSAB1	16:1205832:C:T	rs35482321	NR1	1f	0.22271
TPSAB1	16:1214302:C:T	rs10438679	NR2	1f	0.55324
TPSAB1	16:1245817:T:A	rs8051930	PR1	1b	0.20849
CPPED1	16:12662792:C:A	rs9926821	PR1	5	0.58955
CPPED1	16:12665109:T:C	rs1713480	NR1	5	0.00333
CPPED1	16:12788237:C:A	rs12923226	NR1	1b	0.44867
CPPED1	16:12803538:C:A	rs3748979	PR1	1f	0.55436
CPPED1	16:12811067:T:C	rs7196106	PR2	1f	0.142
GFER	16:1526426:C:G	rs113971932	NR1	1f	0.55436
HBQ1	16:180579:A:G	rs11863726	NR1	1f	0.55436
HAGH	16:1817039:T:C	rs11860469	NR2	1b	0.95
HAGH	16:1877655:C:T	rs7187716	NR2	1f	0.55436
HAGH	16:1899557:G:A	rs112276599	NR1	1d	0.42357
UMOD	16:20350169:C:T	rs35650857	PR1	4	0.60906
UMOD	16:20353266:A:G	rs4293393	NR2	4	0.60906
UMOD	16:20370382:C:T	rs28510439	PR1	1f	0.55324
UMOD	16:20381010:G:A	rs77924615	PR2	1a	0.89
HBQ1	16:219907:A:G	rs11641118	NR1	1b	1
HBQ1	16:231300:G:A	rs3760047	PR1	1b	0.97205
IL4R	16:26994048:T:G	rs8059250	PR1	5	0.02831
IL4R	16:27302790:A:G	rs4238954	PR2	1f	0.22271
IL4R	16:27327703:T:C	rs71388093	PR1	1f	0.55436
SULT1A1	16:28256435:C:G	rs8048601	PR2	1f	0.55436
ITGAM	16:31331922:T:C	rs4594268	NR1	1f	0.55436
VASN	16:4742981:C:T	rs117234488	PR2	1f	0.55436
CES1	16:55810160:C:T	rs28423062	NR1	1f	0.55436
CES1	16:55816819:G:A	rs76336259	PR1	1f	0.55436
CIAPIN1	16:56563362:A:G	rs282231	NR2	1f	0.22271
CCL22	16:57355879:A:G	rs223885	PR2	5	0.13454
CCL17	16:57387107:G:A	rs62037086	PR1	4	0.60906
CCL17	16:57523673:C:T	rs28667938	NR2	6	0.56788
ADGRG1	16:57825500:C:T	rs34235275	NR2	2b	0.392
CTRB1	16:75221319:A:G	rs8051363	PR1	1f	0.55436
CTRB1	16:75221615:C:T	rs139223088	NR1	1f	0.55436
CTRB1	16:75225453:C:A	rs117089763	NR2	1f	0.55436
CTRB1	16:75422828:G:A	rs2865527	NR2	1f	0.55324
CTRB1	16:75453860:T:C	rs8046416	NR1	1f	0.19549
MSLN	16:760593:C:A	rs2235503	PR1	2b	0.38632
CTRB1	16:76162930:C:T	rs56200255	NR2	5	0.58955
CA5A	16:87882686:G:C	rs72816308	NR1	1f	0.55436
CA5A	16:87893616:T:C	rs55870502	PR1	1b	0.22533
APRT	16:88780441:C:A	rs9932423	NR1	1f	0.55436
CDH15	16:89132700:G:A	rs11646135	PR1	1b	0.50217
DPEP1	16:89615717:C:G	rs8044136	NR1	1f	0.55436
DPEP1	16:89626782:A:G	rs444964	NR2	1f	0.55324
DPEP1	16:89665830:C:T	rs258317	PR1	1f	0.02
DPEP1	16:89686623:G:C	rs397891	NR1	1f	0.55436
DPEP1	16:89699655:A:G	rs8047204	PR2	1f	0.55436
HS3ST3B1	17:13930205:C:A	rs2108592	PR1	7	0.51392
HS3ST3B1	17:13933638:G:A	rs62053895	NR1	1f	0.55436
HS3ST3B1	17:14303006:T:C	rs886863	PR1	1b	0.94
HS3ST3B1	17:15034350:G:T	rs72637338	NR2	4	0.60906
SCARF1	17:1631849:T:G	rs9889287	PR1	1f	0.55436
SCARF1	17:1638896:G:A	rs2272011	PR2	1f	0.55436
SCARF1	17:1642039:C:T	rs62088045	PR1	1f	0.22271
SCARF1	17:1647801:G:T	rs62088049	NR2	1f	0.66703
SCARF1	17:1685923:A:G	rs62089994	NR1	1f	0.55436
SHMT1	17:18138962:A:C	rs2075658	NR2	1f	0.55436
SHMT1	17:18337432:C:G	rs2168781	PR1	1f	0.22271
SHMT1	17:18360257:C:A	rs8067462	NR1	1f	0.55324
SHMT1	17:18361135:A:G	rs681998	NR2	7	0.51392
LGALS9	17:27631065:A:G	rs3751092	NR2	1f	0.55436
LGALS9	17:27647232:T:C	rs4239242	PR1	1f	0.55436
BLMH	17:30244910:C:T	rs12945042	NR1	1b	0.9925
BLMH	17:30259885:T:G	rs3794806	PR2	1f	0.22271
BLMH	17:30307283:C:T	rs36048853	PR1	1f	0.55324
BLMH	17:30313974:G:C	rs11870192	NR2	1d	0.11833
CCL8	17:34322718:T:C	rs11575057	PR1	1f	0.55436
CCL18	17:35422527:A:G	rs2586514	NR1	1f	0.55324
CCL5	17:35901941:A:G	rs4796129	PR1	1f	0.22271
CCL23	17:35978489:G:A	rs917015	PR2	1f	0.66703
CCL16	17:35979070:A:G	rs10445391	PR1	1f	0.66703
CCL16	17:35980421:T:C	rs112689088	NR1	1a	0.8
CCL23	17:35983666:A:G	rs41341749	PR2	1f	0.22271
CCL14	17:35985301:T:C	rs9903158	PR1	7	0.51392
CCL15	17:35992028:C:T	rs7217473	PR1	1f	0.55436
CCL23	17:35994241:C:T	rs72831705	NR1	1f	0.22271
CCL15	17:35999179:A:C	rs712048	PR1	1f	0.22271
CCL23	17:36020201:T:C	rs6505501	NR1	7	0.51392
CCL15	17:36025195:T:G	rs9911839	PR2	6	0.66
CCL23	17:36031415:C:T	rs712045	PR2	1f	0.55436
CCL18	17:36062001:G:A	rs854469	PR1	1f	0.55436
CCL18	17:36064257:A:G	rs2015086	NR1	1f	0.55436
CCL3	17:36069898:A:G	rs854471	NR2	1f	0.22271
CCL3	17:36080352:T:A	rs1719217	NR1	6	0.84117
CCL3	17:36084936:G:A	rs1719209	PR2	1f	0.55436
CCL4	17:36097317:T:A	rs11658357	NR2	7	0.51392
CCL3	17:36843249:G:T	rs79109849	PR1	4	0.60906
CCL3	17:36893659:G:A	rs62071140	NR2	5	0.58955
CCL18	17:36905546:G:A	rs7225155	PR1	7	0.18412
PLXDC1	17:38911586:G:A	rs653342	NR1	1f	0.55436
ERBB2	17:39628947:T:G	rs33938012	PR2	1f	0.55436
CSF3	17:39933091:A:G	rs4794820	PR2	6	0.26143
AOC3	17:42847286:G:A	rs35296742	NR2	1f	0.55436
AOC3	17:42852620:G:A	rs33986943	PR1	1f	0.55436
AOC3	17:42854743:G:A	rs34908272	PR2	1b	1
AARSD1	17:42939605:C:T	rs566168	NR2	1f	0.27
VAT1	17:43309222:A:G	rs4792987	NR1	1b	0.95371
PPY	17:43889978:A:T	rs231509	PR1	1f	0.66703
GRN	17:44543175:A:T	rs4793118	NR1	1f	0.55436
GRN	17:45153098:G:C	rs7217422	PR1	1f	0.55324
CXCL16	17:4726230:G:A	rs9894403	NR1	1f	0.55436
CXCL16	17:4753739:C:T	rs754814	PR1	1d	0.90162
VMO1	17:4774345:G:A	rs12949327	NR2	1f	0.25775
VMO1	17:4783119:A:C	rs3851	PR2	1f	0.55436
VMO1	17:4786018:G:C	rs2279961	NR2	1f	0.55436
VMO1	17:4786743:C:A	rs8078118	PR1	1b	0.98331
GP1BA	17:4910727:A:G	rs12939591	NR2	1f	0.08
WFIKKN2	17:50834628:G:A	rs3888213	NR2	1f	0.55436
WFIKKN2	17:50838518:G:A	rs7225019	NR1	1b	0.35
WFIKKN2	17:50838798:G:A	rs7225465	PR1	1f	0.55436
MPO	17:58288745:T:G	rs7215408	NR2	1f	0.55436
GP1BA	17:5878690:C:T	rs7211278	NR1	4	0.60906
CA4	17:60131391:C:T	rs345165	PR1	5	0
CA4	17:60422864:T:G	rs62082086	NR1	1f	0.55436
GH2	17:62953479:A:G	rs111390602	NR1	7	0.51392
CD79B	17:63890078:A:G	rs7224491	PR1	1f	0.55436
CD79B	17:63919139:C:A	rs2011732	NR2	1f	0.55436
CD79B	17:63926622:T:A	rs12449555	PR2	1b	0.92767
ICAM2	17:63979250:G:A	rs7211557	NR2	4	0.60906
MILR1	17:64468504:G:A	rs138176943	PR1	1f	0.22271
APOH	17:66214462:A:C	rs1801689	PR1	5	0.58955
APOH	17:66227741:C:T	rs16958979	PR2	1f	0.55324
APOH	17:66228834:C:A	rs114248359	NR2	1f	0.55436
APOH	17:66229411:G:T	rs8178822	PR1	4	0.60906
CLEC10A	17:7083333:C:T	rs314226	NR2	4	0.60906
CLEC10A	17:7097808:T:A	rs4796372	PR1	5	0.58955
CLEC10A	17:7100810:A:C	rs35249797	NR1	4	0.60906
CD300C	17:73947550:A:G	rs8073195	NR2	5	0.13454
CD300C	17:74510595:C:T	rs1305878	PR1	1f	0.22271
CD300C	17:74530959:C:G	rs1171186	NR1	1f	0.67
CD300E	17:74560514:C:T	rs35274831	PR1	1f	0.05
CD300E	17:74568290:T:C	rs1719509	PR2	1f	0.66703
CD300E	17:74593057:T:C	rs12941999	PR1	7	0.51392
CD300E	17:74634292:A:G	rs536263	NR1	6	0.27045
CD300LF	17:74703694:T:C	rs10512597	NR1	1f	0.55436
CD300LF	17:74705815:A:G	rs9903991	PR1	1f	0.19549
CANT1	17:78988640:A:G	rs60675536	PR1	1f	0.55436
ENPP7	17:79723327:A:G	rs8065292	NR2	1b	0.81679
ENPP7	17:79731780:A:C	rs62077883	PR1	1f	0.55324
ENPP7	17:79732746:T:C	rs11871061	NR1	1f	0.55436
ENPP7	17:79733269:G:A	rs12449776	PR1	1a	0.95
NPTX1	17:80491128:T:C	rs79744555	PR2	1b	1
NPTX1	17:80532122:C:T	rs62067239	NR2	1f	0.81932
NPTX1	17:80564758:C:G	rs111307499	PR1	1f	0.55436
NPTX1	17:80776866:G:A	rs59980856	NR1	1f	0.55436
BAIAP2	17:81510993:G:A	rs1139405	PR1	1f	0.55436
DCXR	17:81963898:T:C	rs35569031	PR1	1f	0.66703
MEP1B	18:32217995:T:C	rs680321	PR2	5	0.13454
MEP1B	18:32224900:T:A	rs654488	PR1	6	0.35072
COLEC12	18:383047:C:G	rs7233716	PR1	4	0.60906
CLUL1	18:580623:T:C	rs61734344	NR2	1f	0.55436
CLUL1	18:589353:G:C	rs12955797	NR2	1f	0.55324
CLUL1	18:590969:C:T	rs2015412	PR1	1f	0.55324
TNFRSF11A	18:61719286:T:C	rs4507007	NR2	1f	0.22271
TNFRSF11A	18:61719354:T:C	rs4441370	NR1	1f	0.22271
TNFRSF11A	18:62055891:A:G	rs72946055	NR1	7	0.51392
TNFRSF11A	18:62355873:C:T	rs74938001	PR2	1f	0.19549
TNFRSF11A	18:62362621:A:G	rs17665027	NR1	1f	0.55324
TNFRSF11A	18:62367416:G:A	rs56051253	NR2	1f	0.22271
TNFRSF11A	18:62380256:G:A	rs9948182	PR1	7	0.51392
TNFRSF11A	18:62387624:A:C	rs884205	PR2	1d	0.66835
SERPINB8	18:63839546:G:T	rs55831713	NR1	1f	0.55324
SERPINB8	18:63980661:C:T	rs3786343	PR1	1f	0.55324
CNDP1	18:74549249:A:G	rs4891560	PR1	7	0.51392
NFATC1	18:79787535:A:G	rs12457876	PR1	1b	0.36991
ICAM5	19:10280935:T:G	rs2358581	PR2	1f	0.55324
ICAM1	19:10282558:A:G	rs5030377	PR1	1f	0.76417
ICAM1	19:10285007:A:G	rs5498	NR1	1f	0.55436
ICAM5	19:10286455:G:A	rs281436	PR1	1b	1
ICAM5	19:10291455:T:C	rs901886	NR1	1f	0.66703
ICAM5	19:10296493:G:C	rs710845	PR1	1f	0.55436
ICAM3	19:10341244:C:T	rs61451658	NR1	1f	0.55324
ICAM3	19:10346796:T:G	rs28378712	NR2	1f	0.55436
ICAM3	19:11162051:T:G	rs111427795	NR1	6	0.69453
ACP5	19:11587844:C:G	rs79061565	NR2	1f	0.55436
ACP5	19:11601693:A:C	rs9789280	NR1	1f	0.55436
ACP5	19:11609452:G:T	rs12985274	PR1	6	0.4372
RTBDN	19:12418379:A:G	rs7247015	PR1	1f	0.55324
ADGRE2	19:14394936:C:G	rs12973667	NR1	4	0.60906
ADGRE2	19:14398152:T:C	rs7508244	NR2	4	0.60906
IL12RB1	19:18103711:T:C	rs11668601	NR1	1b	0.98882
LRRC25	19:18441398:C:T	rs28572537	PR2	1f	0.55436
THOP1	19:2756185:G:T	rs8101456	NR1	1f	0.55324
THOP1	19:2787331:G:A	rs941410	NR2	1f	0.55436
PDCD5	19:32582525:G:A	rs4499344	PR1	1f	0.55436
PDCD5	19:32597460:T:C	rs2277927	PR2	1f	0.22271
PDCD5	19:32673853:C:T	rs259286	NR2	1f	0.55436
EBI3_IL27	19:3444025:C:T	rs34702633	PR2	1f	0.55436
KIRREL2	19:35951215:T:C	rs7247246	PR2	1f	0.22271
SIRT2	19:38458323:C:G	rs2071086	NR1	1b	0.54842
SIRT2	19:38714341:T:A	rs117968873	PR1	1f	0.55436
PLIN3	19:3888598:C:G	rs62133056	NR2	1f	0.55436
MIA	19:40757498:A:G	rs2230694	PR1	1f	0.55436
MIA	19:40762338:A:G	rs2607412	NR1	1f	0.55324
MIA	19:40835684:A:G	rs7251418	NR2	1f	0.22271
CEACAM5	19:41044135:C:A	rs113335154	NR1	1f	0.05
TGFB1	19:41249485:G:A	rs139833223	PR1	1b	0.46817
TGFB1	19:41341955:G:A	rs1800472	PR1	1f	0.55436
TGFB1	19:41374621:T:C	rs7260340	NR2	1f	0.55324
CEACAM21	19:41557611:G:T	rs7255679	PR1	1f	0.55436
CEACAM21	19:41564935:T:C	rs3745937	PR2	1f	0.55436
CEACAM21	19:41577830:G:C	rs723902	PR1	1f	0.03
CEACAM21	19:41581783:G:A	rs4578777	NR1	1d	0.00667
CEACAM21	19:41586462:T:A	rs3745936	NR1	1f	0.19549
EBI3_IL27	19:4236391:G:A	rs353705	PR1	1f	0.55436
EBI3_IL27	19:4247479:C:T	rs8109160	NR1	1f	0.55436
CEACAM1	19:42493412:A:G	rs10469284	PR2	1f	0.39752
CEACAM1	19:42516859:G:C	rs10412463	PR1	1f	0.55436
CEACAM1	19:42535659:T:C	rs6509016	NR2	1f	0.22271
CEACAM1	19:42555447:T:C	rs1076243	NR1	1f	0.55436
EBI3_IL27	19:4259517:C:T	rs4807561	NR2	1f	0.22271
PSG1	19:43123699:T:C	rs2214611	PR1	6	0.24989
CD177	19:43287246:G:A	rs139160455	PR1	1f	0.22271
CD177	19:43351067:T:A	rs73039857	NR1	6	0.20829
LYPD3	19:43455236:G:A	rs35681564	NR1	1f	0.07
LYPD3	19:43462777:G:A	rs2682582	PR2	1f	0.55436
LYPD3	19:43501293:C:T	rs34536923	PR1	1f	0.55324
PLAUR	19:43666441:C:T	rs4251824	PR1	1d	0.95904
PSG1	19:43765479:T:G	rs347515	PR2	1f	0.55436
PSG1	19:43828897:T:C	rs8103162	PR1	7	0.51392
PLAUR	19:44313163:A:G	rs2014501	NR2	1f	0.55436
PVR	19:44613413:G:A	rs846899	NR1	1f	0.55436
PVR	19:44617281:C:T	rs12975854	PR2	1f	0.55436
PVR	19:44626475:A:G	rs846859	PR1	1f	0.55436
PVR	19:44639551:G:T	rs10419829	PR1	1f	0.55436
PVR	19:44644419:T:G	rs10426401	NR2	1f	0.55436
BCAM	19:44853207:T:A	rs73050205	NR1	5	0.64596
NECTIN2	19:44857967:G:A	rs440277	NR2	1a	0.7415
PGLYRP1	19:46055494:T:C	rs2160735	PR1	1f	0.55324
FGF21	19:48955005:C:T	rs4645881	PR2	1f	0.55436
DKKL1	19:49335634:C:A	rs354020	PR2	1f	0.55436
DKKL1	19:49335758:T:C	rs354021	PR1	1d	0.07
DKKL1	19:49336666:G:C	rs354025	NR2	1f	0.55436
DKKL1	19:49342638:C:T	rs8108669	NR2	1f	0.55436
DKKL1	19:49344659:T:C	rs30006	NR1	1f	0.70823
DKKL1	19:49357995:G:A	rs12983800	PR1	1f	0.68
TBC1D17	19:49893006:T:C	rs11673399	PR1	1f	0.55436
KLK10	19:50553597:G:A	rs12974169	PR2	1f	0.55436
CLEC11A	19:50708409:G:T	rs117942370	PR2	1f	0.55436
CLEC11A	19:50711843:A:G	rs41275788	NR2	1f	0.55436
KLK6	19:50957874:C:G	rs12463132	NR1	1b	0.31571
KLK8	19:50988208:A:G	rs1122466	PR1	7	0.51392
KLK8	19:51002840:G:C	rs10404395	NR2	1b	0.20359
KLK10	19:51006822:T:C	rs2569478	NR2	1f	0.55436
KLK10	19:51013935:T:C	rs2739433	PR1	1f	0.22271
KLK10	19:51017231:A:C	rs3745535	PR2	1f	0.55436
KLK10	19:51019035:G:C	rs2304157	NR1	1b	1
KLK13	19:51030161:C:G	rs11669237	NR1	1f	0.55436
KLK12	19:51031874:A:G	rs3745540	PR1	1f	0.55436
KLK13	19:51035305:G:T	rs3760739	NR2	1f	0.07
SIGLEC9	19:51122980:A:G	rs1039405	PR1	1b	0.86517
SIGLEC9	19:51125272:A:G	rs2075803	PR2	1f	0.66703
CD33	19:51215061:T:A	rs1697573	PR1	1f	0.22271
CD33	19:51224706:C:A	rs3865444	PR2	1f	0.55436
CD33	19:51225221:C:T	rs12459419	PR1	1f	0.55436
CD33	19:51225385:A:G	rs2455069	PR2	1f	0.66703
SIGLEC10	19:51408764:T:C	rs35935019	PR2	1f	0.55436
SIGLEC10	19:51413952:A:C	rs60595035	PR1	7	0.51392
SIGLEC6	19:51523346:T:G	rs10410468	NR1	1f	0.55324
SIGLEC6	19:51534343:A:G	rs56118193	NR2	7	0.51392
SIGLEC5	19:51625085:G:C	rs8110578	NR2	1f	0.22271
SIGLEC5	19:51627384:T:A	rs1106476	NR1	1f	0.55436
SIGLEC5	19:51655063:G:T	rs7250849	PR1	1f	0.66703
LAIR2	19:53505523:T:A	rs2447878	PR1	5	0.58955
VSTM1	19:54042277:T:C	rs2433724	PR1	1f	0.55436
VSTM1	19:54045772:T:C	rs57745388	NR1	4	0.60906
VSTM1	19:54046303:T:C	rs11665958	NR1	1f	0.55436
OSCAR	19:54048826:G:C	rs4806698	PR2	1f	0.02937
OSCAR	19:54051696:C:T	rs4442925	PR1	7	0.51392
VSTM1	19:54062922:T:C	rs8111849	NR2	1f	0.55436
OSCAR	19:54072339:T:C	rs1981945	PR1	1f	0.19549
OSCAR	19:54073506:G:A	rs55826339	NR1	6	0.114
LILRB1	19:54098633:A:G	rs12985255	NR2	4	0.60906
OSCAR	19:54106260:G:A	rs8100006	NR1	1f	0.22271
LILRB5	19:54255498:T:C	rs12975366	PR1	1f	0.55436
LILRB5	19:54255803:T:C	rs10405357	PR1	1b	0.17883
LILRB2	19:54271416:C:T	rs11672117	NR1	1d	0.29222
FCAR	19:54273145:T:C	rs111305761	NR1	1f	0.69024
LILRB2	19:54279064:C:T	rs386056	NR1	2b	0.99513
LILRB2	19:54281924:C:T	rs7260261	NR2	1f	0.08
LILRB2	19:54288225:G:T	rs431420	PR1	1f	0.55436
LILRB1	19:54292777:G:A	rs416867	NR1	1f	0.55324
LILRB1	19:54298734:T:G	rs453755	PR2	1f	0.22271
LILRA5	19:54301977:G:A	rs431001	PR2	1f	0.55436
LILRB1	19:54308642:G:A	rs2781751	NR2	1f	0.22271
LILRA5	19:54316893:G:A	rs1645781	NR2	1f	0.55436
LAIR1	19:54343711:C:A	rs111558206	PR1	1f	0.55436
LAIR1	19:54344298:C:A	rs56092919	PR1	1f	0.55436
LAIR2	19:54486247:C:T	rs11668287	PR2	1f	0.55436
LAIR2	19:54490495:G:T	rs879245431	NR2	2b	0.63331
LAIR2	19:54495116:T:A	rs55813959	PR1	5	0.13454
LAIR2	19:54505216:A:G	rs116921443	PR1	1f	0.55436
LAIR2	19:54510332:T:G	rs62131569	PR1	1f	0.08
LAIR2	19:54514267:C:T	rs4407172	NR1	1f	0.08
LAIR2	19:54514855:T:C	rs144267484	NR2	1f	0.22271
LAIR1	19:54519777:G:A	rs111839289	PR2	6	0.14536
LILRA2	19:54573515:A:G	rs28384500	PR1	1b	0.98
LILRB1	19:54631705:T:C	rs12462774	PR2	4	0.60906
KIR3DL1	19:54861907:T:G	rs1654644	PR1	1f	0.307
KIR2DL3	19:54862528:C:T	rs62123385	PR1	1f	0.55324
KIR3DL1	19:54863102:G:A	rs12980764	NR1	7	0.51392
FCAR	19:54867770:C:T	rs12459411	NR1	1f	0.05
FCAR	19:54878455:C:T	rs56216868	PR2	1f	0.22271
FCAR	19:54886824:T:C	rs12975083	PR1	7	0.51392
KIR2DL3	19:54888962:G:A	rs4560030	PR2	1f	0.18086
FCAR	19:54899160:A:G	rs6509908	NR2	1f	0.55324
NCR1	19:54901304:C:A	rs77046104	PR1	4	0.60906
NCR1	19:54901875:G:A	rs112866339	PR2	4	0.60906
GP6	19:55025227:G:A	rs1613662	PR1	1f	0.55436
GP6	19:55039329:C:T	rs1654434	NR1	1f	0.55436
KIR2DL3	19:55279723:C:T	rs62126354	PR1	1f	0.55436
LAIR2	19:55312964:T:G	rs7246479	PR1	1f	0.55436
SSC5D	19:55487775:C:G	rs8103017	PR2	1f	0.66703
SSC5D	19:55491724:G:T	rs66794933	NR1	1b	0.8575
FUT3_FUT5	19:5828884:G:T	rs778811	PR1	4	0.60906
FUT3_FUT5	19:5832198:G:A	rs778805	PR1	1b	0.36991
FUT3_FUT5	19:5841345:G:T	rs3760775	PR2	1b	1
CD70	19:6589097:T:G	rs7247830	NR1	4	0.60906
CD70	19:6591135:C:A	rs17703895	PR1	1f	0.55436
TNFSF14	19:6665009:T:C	rs344560	NR1	4	0.60906
CD209	19:7720812:T:C	rs2335524	NR1	1f	0.22271
FCER2	19:7720827:A:G	rs2335525	PR2	1f	0.22271
CCL25	19:7972156:T:C	rs759817	NR1	1d	0.89
CCL25	19:7977547:A:G	rs3786619	PR2	1a	1
CCL25	19:8014707:T:C	rs72993911	PR1	6	0.42214
CCL25	19:8056476:A:G	rs2032887	PR1	5	0.13454
ANGPTL4	19:8381172:G:A	rs7249520	NR2	1f	0.66703
PRTN3	19:839642:G:A	rs3786991	PR1	4	0.60906
PRTN3	19:840839:T:C	rs2074638	NR1	4	0.60906
RETN	19:8524029:G:A	rs138785496	NR1	1f	0.55436
ICAM3	19:9736371:G:A	rs2112835	PR1	1b	0.18917
IL1R2	2:101993894:C:T	rs4851521	PR2	1f	0.55436
IL1R2	2:101994530:T:C	rs11674595	NR2	1f	0.55436
IL1R2	2:101999692:T:G	rs2310170	NR1	1b	0.68148
IL1R2	2:102007764:G:A	rs3218848	PR1	1f	0.39233
IL1R1	2:102106634:A:C	rs6729953	PR2	1f	0.55436
IL1RL1	2:102141476:A:G	rs36078571	PR2	3a	0.49417
IL1RL2	2:102162001:T:C	rs3917265	PR2	1f	0.55436
IL1RL2	2:102165451:G:T	rs3917289	PR1	7	0.51392
IL1RL2	2:102236305:C:T	rs3821205	PR1	1f	0.55436
IL1RL1	2:102283004:A:G	rs62151694	NR1	1d	0.10833
IL1RL1	2:102309902:G:A	rs12470864	PR1	7	0.51392
IL1RL1	2:102315366:C:G	rs13020553	NR1	1f	0.22271
IL18R1	2:102350323:T:C	rs1861246	NR2	1f	0.55436
IL18R1	2:102354740:T:C	rs9807989	NR1	7	0.51392
IL18R1	2:102361940:A:G	rs11465567	PR1	1b	1
IL18R1	2:102370753:A:G	rs11465597	NR1	1f	0.22271
IL18R1	2:102373274:A:G	rs2041740	NR1	1f	0.55324
IL18R1	2:102398236:C:T	rs1568681	PR1	1f	0.08583
EDAR	2:108928133:G:A	rs62151088	NR2	1b	0.35082
EDAR	2:108957694:C:T	rs260707	PR1	4	0.60906
EDAR	2:108969915:T:C	rs11123719	PR2	1b	0.68
EDAR	2:108982800:G:A	rs260674	PR2	1d	0.90947
MERTK	2:112014626:A:G	rs4524124	PR1	1f	0.55436
MERTK	2:112022157:A:G	rs12989808	PR2	1f	0.55436
IL1RN	2:113078588:A:T	rs11123160	NR2	1f	0.55436
IL1RN	2:113106928:G:C	rs315923	PR2	1f	0.55324
IL1RN	2:113109711:T:C	rs55709272	NR1	1d	0.96769
IL1RN	2:113368193:G:A	rs6761040	PR2	7	0.51392
DPP10	2:115126349:G:T	rs10184481	PR2	6	0.025
DPP10	2:115168986:A:T	rs10182527	PR1	6	0.17686
DPP10	2:115287706:G:A	rs7565854	PR2	7	0.51392
MARCO	2:118904998:C:G	rs10460473	PR1	1f	0.22271
MARCO	2:118970896:C:T	rs35288880	PR2	1d	0.938
MARCO	2:118983428:C:T	rs6751745	NR1	1f	0.19549
DARS1	2:136042039:C:T	rs10928554	NR1	7	0.51392
HNMT	2:138002079:C:T	rs11558538	PR1	1f	0.22271
KYNU	2:143455016:C:T	rs76049666	NR1	5	0.97858
LY75	2:158905141:A:C	rs67285498	PR1	5	0
LY75	2:159819139:G:A	rs67073100	PR1	1f	0.22271
LY75	2:159820864:C:G	rs12052715	PR2	7	0.51392
LY75	2:159831014:A:G	rs7573674	PR1	6	0.12848
LY75	2:159889274:G:T	rs925411	NR1	7	0.51392
LY75	2:159897539:T:C	rs7601374	PR2	1f	0.22271
LY75	2:159903827:G:A	rs3792198	PR1	1b	0.98838
LY75	2:159905297:T:C	rs3806603	NR2	1b	0.76221
LY75	2:159918894:T:C	rs13032589	PR1	1f	0.55436
ITGB6	2:160111497:A:T	rs7563574	PR2	1f	0.22271
DPP4	2:162062011:A:G	rs2892816	NR1	1f	0.02937
GALNT3	2:165695298:A:G	rs777354	PR2	1f	0.22271
GALNT3	2:165754317:C:T	rs13406280	NR2	6	0.37833
GALNT3	2:165777217:G:A	rs4667837	PR1	7	0.51392
GALNT3	2:166080585:T:C	rs569745	NR1	7	0.51392
FRZB	2:182829772:C:T	rs7593100	NR1	1f	0.22271
FRZB	2:182835041:G:A	rs73977799	PR1	1f	0.66703
FRZB	2:182838236:G:A	rs1561369	NR2	5	0.67814
FRZB	2:182985666:T:C	rs72888404	NR2	1f	0.22271
ITGAV	2:186712150:T:C	rs17334422	PR1	7	0.51392
TFPI	2:187427731:C:T	rs16829016	PR2	1f	0.55324
TFPI	2:187428664:C:T	rs11894589	NR1	1f	0.89667
TFPI	2:187450507:G:A	rs10179705	NR2	7	0.51392
TFPI	2:187486431:A:G	rs8176506	PR1	1b	0.86517
MATN3	2:19516410:T:C	rs11676532	PR1	5	0.23589
MATN3	2:20007858:G:A	rs11694716	PR2	1f	0.43917
MATN3	2:20020375:T:G	rs1191804	PR1	1f	0.55436
CASP8	2:201284866:G:C	rs1045485	PR1	1f	0.66703
CASP8	2:201300082:C:G	rs56328050	NR2	1f	0.22271
NRP2	2:204896077:C:T	rs2161854	NR1	5	0.13454
ADAM23	2:206063668:T:C	rs62195367	NR2	1f	0.55436
ADAM23	2:206213576:A:G	rs6758395	NR1	1b	0.90197
ADAM23	2:206454929:C:T	rs72933222	PR1	1f	0.55436
ADAM23	2:206486897:T:G	rs2300970	PR1	7	0.51392
ADAM23	2:206548901:G:A	rs13429599	PR2	7	0.51392
DNER	2:229680267:T:C	rs2216248	NR1	1f	0.55436
DNER	2:229977720:A:G	rs62191707	PR1	1f	0.22271
NPPC	2:231848921:C:A	rs1246017	PR2	4	0.70497
ALPP	2:232370621:A:C	rs2741309	NR2	1d	0.76
ALPP	2:232373290:C:T	rs2678536	PR1	1f	0.05
ALPP	2:232374928:G:C	rs55974952	PR2	1f	0.55436
ALPP	2:232421944:C:T	rs12478529	PR1	1f	0.55436
ALPP	2:232436825:T:C	rs11886043	NR2	1f	0.55436
ALPP	2:232448558:A:G	rs1190413	NR1	1b	0.99522
ALPP	2:232453514:T:C	rs3762521	PR2	1f	0.22271
SCLY	2:238099165:A:G	rs1054640	NR2	1f	0.66703
GPC1	2:240464000:T:G	rs77078946	PR1	1f	0.55436
GPC1	2:240467308:C:T	rs35984995	PR2	1f	0.55436
AGXT	2:240806304:A:C	rs5027087	NR1	1f	0.22271
AGXT	2:240838567:G:C	rs6437369	PR2	1f	0.08
CGREF1	2:26417913:G:A	rs4491689	PR1	7	0.51392
CGREF1	2:26617080:A:G	rs1662980	PR1	1f	0.55436
CGREF1	2:26718044:C:T	rs62129551	NR1	1b	0.3284
CGREF1	2:26943954:T:C	rs6707735	PR2	1f	0.55436
CGREF1	2:27040254:T:C	rs1866654	NR2	1b	0.82368
CGREF1	2:27086791:A:C	rs6742004	NR1	1f	0.55436
CGREF1	2:27118195:A:T	rs6746337	PR1	1b	0.88043
CGREF1	2:27256675:C:T	rs76881617	PR2	1f	0.22271
CGREF1	2:27371530:C:T	rs76476582	PR1	1f	0.55436
QPCT	2:37237287:A:G	rs4998429	PR1	6	0.74073
QPCT	2:37388897:G:A	rs7603937	PR2	4	0.60906
QPCT	2:38282177:G:T	rs12468437	NR1	1f	0.55324
MCFD2	2:46903009:G:T	rs1051317	PR1	1f	0.55436
MCFD2	2:46914826:A:G	rs62140549	NR2	1f	0.55436
MCFD2	2:46947977:G:A	rs6544941	NR1	1b	0.95833
EFEMP1	2:55785926:A:C	rs17047234	NR2	1f	0.66703
EFEMP1	2:55959336:G:A	rs1465685	PR1	1f	0.13154
CD207	2:70353685:G:A	rs77913056	PR1	1f	0.64343
TGFA	2:70532295:C:T	rs365259	PR2	1f	0.55436
TGFA	2:70582228:T:C	rs74543090	PR1	1f	0.22271
REG1B	2:79085856:A:C	rs6547221	NR2	1b	0.68
REG1B	2:79088225:T:C	rs2073442	NR1	1f	0.55436
REG3A	2:79232969:A:G	rs1434193	NR2	7	0.51392
TMSB10	2:84147872:C:G	rs12714118	PR1	4	0.60906
CAPG	2:85325138:A:G	rs2292653	PR1	1f	0.70823
CAPG	2:85394936:T:C	rs6886	PR2	1f	0.55436
CAPG	2:85399458:A:T	rs35391999	PR1	1b	0.82104
VAMP5	2:85455976:G:A	rs17026352	PR1	1f	0.66703
GNLY	2:85705880:C:T	rs12151742	PR2	1b	0.69
GNLY	2:85707529:T:C	rs12151752	PR1	1f	0.55436
CD8A	2:86638016:G:A	rs4423596	NR2	1f	0.55324
CD8A	2:86789383:A:G	rs3020726	PR1	1f	0.55436
FABP1	2:88123991:A:G	rs1545223	PR1	1b	1
SIRPB1	20:1516551:G:A	rs6135148	PR1	1f	0.22271
SIRPB1	20:1531627:C:T	rs6110353	NR2	6	0.80877
SIRPB1	20:1535724:C:A	rs111733089	NR1	1f	0.66703
SIRPB1	20:1557733:C:T	rs73604175	NR1	1f	0.19549
SIRPB1	20:1566096:T:A	rs2243602	NR1	1f	0.66703
SIRPB1	20:1566159:G:A	rs62623705	PR1	1b	1
SIRPA	20:1568756:A:T	rs2254194	NR1	1f	0.11
SIRPA	20:1577098:A:G	rs2243425	PR2	1f	0.22271
SIRPA	20:1616787:G:T	rs34600126	PR1	1f	0.55436
SIRPA	20:1914887:T:C	rs72620873	PR1	1f	0.55324
CST3	20:23638015:A:C	rs71334202	PR1	1a	0.77
CST3	20:23641913:G:A	rs2424582	NR2	1f	0.55436
CST3	20:23642121:T:G	rs2254635	PR2	1f	0.55436
CST3	20:23656193:A:G	rs8123349	PR2	1f	0.55436
CST3	20:23684003:G:C	rs73104325	PR1	1f	0.66703
CST5	20:23838962:C:T	rs13045869	NR2	7	0.51392
CST5	20:23878117:A:G	rs4815243	NR1	1f	0.22271
CST5	20:23879541:A:G	rs1799841	PR1	1f	0.55436
CST7	20:24919654:G:T	rs1977540	PR2	1f	0.22271
CST7	20:24991697:C:T	rs7268095	PR1	1f	0.55436
CST7	20:25057595:G:T	rs7265721	PR1	1f	0.55436
CST7	20:25063387:G:T	rs1005409	PR1	1b	1
CST7	20:25247508:C:A	rs55741503	PR2	1f	0.55436
CPXM1	20:2797182:G:T	rs742707	NR2	1f	0.22271
CPXM1	20:2803125:A:G	rs13043754	NR2	1d	0.78643
CPXM1	20:2803760:A:C	rs6084176	PR1	1f	0.55436
CPXM1	20:2810695:A:T	rs11087557	NR1	5	0
CPXM1	20:2819251:C:A	rs58625759	PR2	1f	0.02154
BPIFB1	20:33032116:C:T	rs2070313	PR2	1f	0.55436
BPIFB1	20:33101062:G:C	rs761931	NR2	1f	0.55324
BPIFB1	20:33106254:C:T	rs2424961	NR1	1f	0.55436
LBP	20:38349567:G:A	rs1739654	PR2	1f	0.55436
LBP	20:38353359:C:T	rs6025102	PR1	1f	0.55436
LBP	20:38356058:A:C	rs76186816	PR1	2b	0.77783
ADA	20:44492042:C:T	rs112665079	PR2	4	0.60906
ADA	20:44522114:G:A	rs11699411	PR1	1a	0.98
ADA	20:44542359:G:A	rs11696619	NR1	1f	0.55436
ADA	20:44626579:T:C	rs11555566	NR2	1f	0.55436
CCN5	20:44674601:C:T	rs6073508	PR1	7	0.51392
WFDC12	20:44965137:G:A	rs2284269	NR2	1f	0.55324
WFDC12	20:44980575:A:G	rs6031901	PR1	7	0.51392
WFDC12	20:44993462:T:G	rs2903772	PR2	1f	0.66703
WFDC12	20:45121769:T:C	rs6130764	NR1	1f	0.08
WFDC12	20:45123415:A:T	rs12624725	NR2	7	0.18412
WFDC12	20:45131820:A:G	rs6104027	PR1	1f	0.55324
WFDC12	20:45137426:G:T	rs2143943	NR2	1f	0.55324
PI3	20:45257186:C:T	rs3761193	PR2	1f	0.55324
PLTP	20:45906012:G:A	rs6065904	NR1	1f	0.55436
PLTP	20:45916308:T:C	rs58847685	NR2	7	0.51392
PLTP	20:45923216:T:C	rs6073958	PR1	1f	0.55324
CD40	20:46101258:C:T	rs6074019	NR1	1f	0.22271
CD40	20:46118343:T:C	rs1883832	PR1	1f	0.55436
CD40	20:46119308:T:G	rs4810485	NR1	1f	0.55436
CD40	20:46128768:G:A	rs3765459	NR2	1f	0.55436
MAVS	20:4740876:A:G	rs2422937	NR2	1f	0.66703
CHGB	20:5917131:A:C	rs446658	PR2	1f	0.55436
CHGB	20:5917132:G:C	rs446659	PR1	1f	0.55436
CHGB	20:5952889:A:G	rs236111	NR2	1f	0.55324
TNFRSF6B	20:63771507:G:A	rs6089986	NR1	1f	0.55436
TNFRSF6B	20:63784340:T:C	rs6089995	NR2	1f	0.22271
HAO1	20:6944034:G:T	rs6077102	NR2	5	0.13454
CXADR	21:17462928:A:G	rs56358256	NR1	2b	0.81
TMPRSS15	21:19354047:C:A	rs59537583	PR1	5	0.58955
NCAM2	21:21000405:T:C	rs8184921	PR2	1f	0.22271
NCAM2	21:21463626:A:G	rs2826851	NR1	1f	0.22271
NCAM2	21:21506932:G:A	rs2826870	PR1	5	0.58955
IFNGR2	21:32921786:C:T	rs78483849	NR1	1f	0.55436
IL10RB	21:33283765:T:C	rs2834173	PR1	1d	0.91083
IL10RB	21:33287145:G:C	rs2850005	NR2	1f	0.55436
IL10RB	21:33291734:C:T	rs2843700	NR1	1f	0.55436
IFNGR2	21:33415005:A:G	rs9808753	PR2	1f	0.55436
IFNGR2	21:33424249:C:T	rs8133431	PR1	1f	0.55436
FAM3B	21:41317710:G:T	rs66817580	PR2	1a	0.72602
FAM3B	21:41322740:T:C	rs2838011	NR1	1f	0.55436
FAM3B	21:41323234:A:G	rs2838013	NR2	1b	0.54842
FAM3B	21:41339352:C:T	rs11909649	NR2	7	0.51392
FAM3B	21:41344348:G:A	rs4818234	NR1	1f	0.55436
FAM3B	21:41346335:C:T	rs57529409	PR2	1f	0.55436
FAM3B	21:41349694:G:A	rs67184452	PR1	1f	0.22271
TFF3	21:41714574:A:C	rs62214246	NR2	4	0.60906
CSTB	21:43781951:G:A	rs35285321	PR1	1f	0.55436
ICOSLG	21:44230948:G:A	rs142245362	PR1	5	0
ICOSLG	21:44233876:A:G	rs7281454	NR1	7	0.18412
COL18A1	21:45494728:A:G	rs9977637	PR1	1f	0.55436
IL17RA	22:17134894:G:A	rs60241621	PR1	1f	0.55436
IL17RA	22:17142785:T:C	rs11089413	NR1	1f	0.22271
IL17RA	22:17142947:A:G	rs5747009	NR2	1f	0.22271
COMT	22:19961490:C:T	rs165722	PR2	1a	0.75
COMT	22:19962712:C:T	rs4633	NR1	1a	0.769
COMT	22:19963748:G:A	rs4680	PR1	1f	0.55436
CRKL	22:20159272:G:C	rs175187	PR1	1f	0.55436
SCARF2	22:20410305:T:G	rs1013634	NR1	1f	0.55324
SCARF2	22:20419231:G:C	rs738088	PR2	1b	1
MIF	22:23870061:A:G	rs60719441	PR1	7	0.51392
MIF	22:23908608:C:G	rs2330634	NR1	1b	0.31889
MIF	22:23924539:T:C	rs5751775	PR1	1b	0.69
MIF	22:23953099:T:C	rs2739330	NR2	4	0.60906
SUSD2	22:24175884:G:A	rs75303441	NR2	1b	0.99
SUSD2	22:24181153:G:C	rs12484381	NR1	1f	0.55436
GGT5	22:24486017:G:C	rs9612635	PR2	1b	0.43117
SEZ6L	22:26385284:C:T	rs627229	NR2	2b	0.97133
TCN2	22:30563039:C:T	rs5749128	NR2	1f	0.499
TCN2	22:30606651:G:A	rs13058138	NR1	1f	0.55436
TCN2	22:30612758:A:G	rs740234	NR2	1f	0.39752
TCN2	22:30622238:T:C	rs5753247	PR1	6	0.05
TCN2	22:30624354:G:T	rs12485165	NR1	7	0.51392
TCN2	22:30703940:C:T	rs13053993	PR1	1f	0.19549
PIK3IP1	22:31521429:A:G	rs4820980	PR1	1f	0.22271
PIK3IP1	22:31552904:G:A	rs5753687	NR2	1f	0.55436
PIK3IP1	22:31595015:G:A	rs5753715	NR2	1b	0.22533
PIK3IP1	22:31605849:C:A	rs761747	PR2	1b	1
PIK3IP1	22:31617759:T:C	rs7289075	PR1	1b	0.90882
PIK3IP1	22:31619176:C:T	rs8461	NR1	1f	0.55436
TIMP3	22:32752589:G:A	rs743740	NR1	1f	0.22271
TIMP3	22:32763106:A:G	rs4821097	PR1	7	0.51392
TIMP3	22:32765566:G:A	rs1079734	PR2	1f	0.55436
TIMP3	22:32777672:C:G	rs5754275	NR2	7	0.51392
TIMP3	22:32779732:G:A	rs2001048	NR2	1b	0.90882
TIMP3	22:32779763:G:A	rs2001049	NR1	1b	0.36991
MB	22:36109879:C:T	rs11913191	PR1	1b	0.68148
HMOX1	22:36260191:G:A	rs136155	PR2	1f	0.18086
PVALB	22:36862461:T:C	rs4821544	PR2	1b	0.22533
PVALB	22:37054720:T:G	rs710183	PR1	1f	0.55436
NPTXR	22:38806012:T:C	rs56187235	NR1	5	0.58955
NPTXR	22:38845504:A:G	rs9607581	PR1	1b	0.43617
NPTXR	22:38849635:C:G	rs13053206	PR1	1f	0.55436
NPTXR	22:38869003:G:A	rs73159327	NR1	1f	0.66703
TNFRSF13C	22:41843344:G:C	rs1009544	PR1	1f	0.55436
TNFRSF13C	22:41885145:T:G	rs9623466	NR1	1f	0.44667
TNFRSF13C	22:41930162:T:C	rs144886236	NR1	1f	0.55436
CRELD2	22:49896346:C:T	rs9616771	NR2	1f	0.55436
ARSA	22:50117902:C:T	rs138223	PR2	1b	0.68148
PLXNB2	22:50268262:A:G	rs742186	PR1	1b	0.33
TYMP	22:50519091:G:A	rs3091397	PR2	1d	0.31671
TYMP	22:50538325:T:C	rs131788	NR2	1f	0.55436
TYMP	22:50539595:C:A	rs140521	PR1	1f	0.55436
TYMP	22:50541642:G:A	rs131785	NR1	1f	0.55436
ARSA	22:50570421:A:G	rs2073605	NR2	1d	0.96333
ARSA	22:50615968:T:G	rs2334107	PR1	1b	0.49233
PLXNB2	22:50697023:G:C	rs9616939	NR1	1f	0.55436
CD200	3:112609582:A:T	rs72622328	NR2	7	0.51392
CD200R1	3:112921689:G:A	rs57891445	PR1	5	0.58955
CD200R1	3:112928985:A:C	rs9826308	PR1	1f	0.55436
CD200R1	3:112931936:G:A	rs7611690	NR1	1f	0.55436
PODXL2	3:127914340:T:C	rs74607438	NR2	1f	0.55436
CLSTN2	3:139916951:G:A	rs7355825	NR2	1f	0.55436
TNFSF10	3:172373394:A:G	rs7638580	PR1	4	0.60906
LAMP3	3:183096343:A:T	rs4859275	PR1	6	0.49716
LAMP3	3:183583986:T:C	rs9824873	PR1	1b	0.71
ST6GAL1	3:186166729:G:A	rs3774052	PR2	4	0.70497
MASP1	3:186361834:G:T	rs112936817	NR1	4	0.60906
FETUB	3:186739543:C:T	rs5030115	PR1	5	0.72
IL1RAP	3:190611083:A:G	rs6793294	NR1	7	0.51392
IL1RAP	3:190616826:C:T	rs2161060	NR2	1f	0.55436
IL1RAP	3:190622388:A:C	rs9813227	PR1	1f	0.22271
IL1RAP	3:190636457:A:T	rs4624606	NR1	6	0.28235
IL1RAP	3:190645805:G:A	rs34879831	PR1	1f	0.22271
TFRC	3:196066034:A:C	rs9852883	NR1	3a	0.4701
TFRC	3:196104227:A:C	rs9867473	NR2	1f	0.11667
CHL1	3:198854:C:T	rs6769011	PR1	1f	0.55436
CNTN4	3:2813304:T:C	rs9841434	PR2	7	0.18412
CNTN4	3:2952437:C:G	rs6442771	NR1	5	0.005
IL5RA	3:3103081:C:T	rs6800335	PR1	5	0.23589
IL5RA	3:3111246:G:T	rs17878498	PR1	1a	0.952
IL5RA	3:3111510:G:A	rs6787336	PR2	1f	0.55436
IL5RA	3:3112912:G:A	rs9809884	NR1	4	0.60906
LRRN1	3:3765908:T:C	rs6801789	PR2	1f	0.55436
LRRN1	3:3773480:G:A	rs4103818	PR1	6	0.22
SETMAR	3:4306285:T:C	rs67779244	NR2	1f	0.4715
SETMAR	3:4336310:G:C	rs60322321	NR1	1f	0.55436
CDCP1	3:45135021:G:A	rs78521038	PR1	1f	0.55324
TDGF1	3:46575847:G:A	rs3806701	NR1	1f	0.55436
TDGF1	3:46576012:T:C	rs3806702	PR2	1f	0.55436
TDGF1	3:46577748:T:A	rs80045772	PR1	1f	0.66703
HYAL1	3:49862917:G:A	rs67070774	NR2	1f	0.55436
HYAL1	3:50141389:G:A	rs74403826	PR1	1d	0.2475
DAG1	3:50235280:G:A	rs73082903	PR2	1f	0.55324
HYAL1	3:50254185:G:A	rs9852677	PR1	1f	0.615
HYAL1	3:50302191:C:T	rs116482870	PR2	1b	0.22533
ABHD14B	3:51012575:C:A	rs62257841	NR1	7	0.51392
CHL1	3:51395:A:G	rs13077895	NR2	6	0.78165
ITIH3	3:52430811:T:C	rs62257614	PR1	1b	0.96
ITIH3	3:52786995:A:G	rs1042779	NR1	1f	0.66703
ITIH3	3:52797685:C:G	rs2240919	NR2	1f	0.55436
IL17RB	3:53839787:A:G	rs35518479	NR2	1f	0.55324
IL17RB	3:53842191:A:G	rs6801605	PR1	1f	0.55436
IL17RB	3:53843122:G:T	rs6445607	PR1	1f	0.55436
CHL1	3:66232:T:A	rs1015457	NR1	6	0.92506
LRIG1	3:66384219:T:C	rs2306272	PR1	1f	0.55436
LRIG1	3:66394273:A:C	rs17775391	NR1	1f	0.55436
CHL1	3:66669:G:A	rs35713901	PR2	1f	0.55436
CNTN3	3:74564377:T:C	rs17012625	NR2	7	0.18412
CNTN3	3:74627106:A:G	rs77396249	PR1	1f	0.22271
ROBO1	3:78918742:G:T	rs479956	PR2	1b	0.3284
ROBO1	3:80373976:T:C	rs34656173	NR1	7	0.18412
ROBO1	3:80762903:C:T	rs55772209	NR1	1f	0.55436
DCBLD2	3:98790743:G:A	rs278390	NR1	1f	0.55436
IDUA	4:1005682:C:T	rs76048788	NR2	1f	0.55436
BANK1	4:101075959:T:C	rs72681037	NR2	4	0.60906
BANK1	4:101720855:C:T	rs12501586	NR1	5	0.13454
BST1	4:15554057:A:G	rs17385861	NR2	1f	0.07
BST1	4:15645451:A:G	rs7683000	PR1	7	0.51392
BST1	4:15722169:A:T	rs10018756	PR1	7	0.51392
BST1	4:15726090:C:T	rs6449168	NR2	1b	0.86517
BST1	4:15736860:G:A	rs2103	NR1	1d	0.5
CD38	4:15767132:C:A	rs10005419	PR1	1f	0.55436
CD38	4:15768028:A:T	rs4698417	NR2	1f	0.04
CD38	4:15812723:A:G	rs10003282	PR2	6	0.18937
QDPR	4:17509972:A:T	rs10020171	PR1	1f	0.55436
QDPR	4:17515619:C:T	rs28382333	NR2	1f	0.66703
QDPR	4:17525490:A:G	rs35216955	NR1	1f	0.05
QDPR	4:17555698:T:C	rs73233430	PR2	1f	0.55324
IDUA	4:1784011:G:A	rs1867926	NR2	1d	0.31671
QDPR	4:18310073:A:G	rs58604440	NR1	7	0.18412
CASP3	4:183656024:T:C	rs6838230	NR1	1f	0.55324
TLR3	4:186076613:C:A	rs3775296	PR1	7	0.51392
TLR3	4:186082920:C:T	rs3775291	PR1	7	0.51392
SLIT2	4:19827565:T:C	rs11941461	NR1	5	0.23589
LRPAP1	4:3499799:G:C	rs114634328	NR1	1b	0.54708
KLB	4:39458870:C:G	rs2276890	PR1	1f	0.55436
KLB	4:39484214:C:T	rs12504134	NR1	1f	0.55436
KLB	4:39485349:T:A	rs10025454	NR2	1d	0.79853
KDR	4:55091149:G:A	rs13127286	PR1	5	0.58955
KDR	4:55101517:C:T	rs7677779	NR1	7	0.18412
IGFBP7	4:56952471:G:A	rs78440444	PR1	5	0.13454
IGFBP7	4:57078665:C:T	rs4865176	NR1	1f	0.55436
S100P	4:6002590:G:A	rs76506738	PR2	4	0.70497
S100P	4:6707618:T:C	rs4689523	NR1	1f	0.55436
SORCS2	4:7218180:G:A	rs4234797	PR2	1b	0.9225
SORCS2	4:7218206:T:G	rs4234798	NR1	1f	0.55436
SORCS2	4:7220526:G:A	rs4689088	PR1	1f	0.125
CXCL6	4:73772199:C:T	rs6831029	NR1	7	0.51392
CXCL3	4:73834025:G:A	rs12645462	PR2	7	0.51392
CXCL6	4:73838282:C:T	rs16850073	PR1	6	0.33
CXCL1	4:73862791:A:G	rs2145614	NR1	7	0.51392
CXCL1	4:73868951:T:C	rs3117604	NR1	1f	0.55436
CXCL1	4:73872737:C:G	rs3097411	PR2	1f	0.66703
CXCL1	4:73880088:C:T	rs3111697	PR1	6	0.12515
CXCL5	4:74007885:T:C	rs187082	NR2	7	0.51392
CXCL5	4:74008485:T:C	rs2115693	NR1	1f	0.55436
AFP	4:74399146:G:A	rs11727089	NR2	4	0.60906
CXCL6	4:74668977:T:A	rs12508014	PR1	2b	0.50489
NAAA	4:75177835:G:A	rs12501793	PR2	7	0.51392
CXCL9	4:75518234:A:G	rs77289963	PR1	7	0.51392
NAAA	4:75919627:C:T	rs55967764	NR1	1f	0.22271
NAAA	4:75935911:G:C	rs66498356	PR2	1b	0.45
NAAA	4:75937118:T:A	rs34630680	PR1	1f	0.22271
ART3	4:76009147:A:C	rs116030576	NR2	6	0.49716
NAAA	4:76067417:A:G	rs28564530	NR2	1f	0.55436
ART3	4:76104657:G:A	rs17224545	NR1	1f	0.22271
SCARB2	4:76151444:T:C	rs10008834	NR1	7	0.51392
SCARB2	4:76196421:A:C	rs999361	NR2	1f	0.55436
ART3	4:76773322:C:T	rs4859713	PR1	5	0.58955
ANXA3	4:78048770:A:G	rs35234380	NR1	5	0.13454
FGF5	4:80243569:C:T	rs1458038	PR1	1f	0.07
FGF5	4:80263187:A:T	rs16998073	PR2	1f	0.66703
SPARCL1	4:87501221:T:C	rs4693166	PR1	1f	0.55324
SPARCL1	4:87501986:G:A	rs4693820	NR2	7	0.51392
SPARCL1	4:87507544:G:A	rs6812158	NR1	1b	0.99571
SPARCL1	4:87510396:A:C	rs4693825	PR2	1f	0.55324
SPARCL1	4:87526183:T:C	rs6845839	NR2	1f	0.55436
SPARCL1	4:87529944:C:T	rs17012830	NR1	1d	0.14889
HPGDS	4:93764377:A:G	rs6836766	PR2	4	0.60906
HPGDS	4:94355382:T:C	rs10006191	PR2	7	0.18412
HPGDS	4:94357519:C:T	rs1593553	PR1	7	0.18412
IDUA	4:959910:A:C	rs4690326	NR1	1b	0.99522
IDUA	4:966925:G:A	rs4690196	PR1	1a	0.48
IDUA	4:971991:G:A	rs11724804	PR2	1b	0.9845
IDUA	4:989272:T:C	rs3796622	NR2	1f	0.55436
PAM	5:102162662:T:C	rs10455064	NR2	1f	0.55324
PAM	5:102902798:G:T	rs10038600	NR1	1f	0.55436
PAM	5:102974462:G:A	rs3733939	PR2	1f	0.55436
MEGF10	5:127287611:T:A	rs6869632	PR2	7	0.51392
TXNDC15	5:134887903:A:G	rs3733897	PR2	1d	0.91083
TXNDC15	5:134971200:C:T	rs77625575	PR1	6	0.14583
TGFBI	5:136047300:G:C	rs1442	PR1	1f	0.55436
TGFBI	5:136048754:A:G	rs916951	NR2	1b	0.95081
TGFBI	5:136073435:G:A	rs12521108	NR1	1f	0.55436
MZB1	5:139439484:T:C	rs3923059	NR1	1a	0.86944
CD14	5:140633982:T:G	rs5744454	NR2	1f	0.66703
CD14	5:140644906:A:G	rs702398	PR1	1f	0.66703
SPINK5	5:147309020:G:A	rs6580461	NR1	5	0.58955
SPINK1	5:147397435:T:C	rs6877045	NR1	5	0.67067
SPINK1	5:147838260:C:A	rs7725017	PR1	1f	0.66703
SPINK5	5:148129088:T:C	rs2112766	PR2	1f	0.19549
SPINK5	5:148130632:C:T	rs28627452	PR1	7	0.51392
SPINK5	5:148131899:A:G	rs2400477	NR1	1f	0.68881
SPINK6	5:148161645:T:C	rs6580526	PR1	1f	0.22271
SPINK6	5:148195643:A:G	rs2017896	PR2	6	0.14536
SPINK5	5:148839784:T:C	rs62378383	PR2	1f	0.19549
PDGFRB	5:150128912:C:T	rs3816018	NR1	7	0.51392
PDGFRB	5:150135511:G:A	rs740750	PR1	1d	0.33833
GALNT10	5:153639607:A:G	rs2910261	PR1	1f	0.22271
GALNT10	5:154182786:G:A	rs10055906	NR2	6	0.28784
GALNT10	5:154194378:C:T	rs890793	PR1	1f	0.55436
HAVCR1	5:156989695:G:T	rs12659077	PR1	6	0.80877
HAVCR1	5:157036347:C:T	rs10462975	NR1	7	0.51392
HAVCR1	5:157042315:G:A	rs12520634	PR2	7	0.51392
HAVCR1	5:157051769:T:A	rs7726556	NR2	1f	0.66703
IL12A_IL12B	5:159338900:A:G	rs77133000	PR2	5	0.58955
IL12B	5:159342745:T:C	rs4921484	PR1	1f	0.55324
IL12B	5:159387525:A:C	rs10045431	NR2	1f	0.22271
PDLIM7	5:176741506:C:A	rs729823	NR1	4	0.60906
PDLIM7	5:178199369:C:T	rs11949084	NR2	5	0.13454
PDLIM7	5:178475888:G:A	rs2672828	PR1	1f	0.55436
PDCD6	5:199300:G:A	rs28636067	PR1	1f	0.66703
PDCD6	5:244828:C:T	rs12332382	NR2	7	0.51392
CDH6	5:30830490:G:A	rs35733856	NR1	7	0.18412
CDH6	5:30839344:G:A	rs4626350	NR2	1f	0.55436
CDH6	5:30841947:T:G	rs12517438	PR1	5	0.13454
CDH6	5:31113307:C:G	rs16900696	PR1	1f	0.55436
CDH6	5:31123036:A:G	rs10079279	PR2	1f	0.55436
IL7R	5:35857602:A:G	rs11567694	NR2	1d	0.3175
IL7R	5:35862739:C:T	rs7717955	PR1	1f	0.22271
IL7R	5:35881274:G:T	rs11742240	NR1	1f	0.55436
GDNF	5:37785815:G:C	rs62358929	NR1	1f	0.55436
OSMR	5:38844649:C:G	rs3763097	PR1	1d	0.90162
OSMR	5:38846452:A:C	rs2292018	NR2	1f	0.55436
OSMR	5:38852470:C:T	rs9292723	PR2	7	0.51392
OSMR	5:38883969:T:G	rs34675408	NR1	2b	0.77783
OSMR	5:38898345:G:A	rs1897140	NR2	1f	0.88917
GZMA	5:55029019:G:C	rs113164247	PR2	6	0.04329
F2R	5:76657853:A:G	rs3797435	PR1	1b	0.94667
F2R	5:76663238:G:A	rs3797446	NR1	1f	0.22271
CRHBP	5:76871865:T:C	rs55863251	NR2	1f	0.22271
CRHBP	5:76876919:T:C	rs10063816	PR2	1f	0.22271
CRHBP	5:76877394:G:T	rs10070865	PR1	1f	0.22271
CRHBP	5:76911950:A:T	rs6879129	NR1	7	0.51392
CRHBP	5:77059089:T:C	rs76623763	NR2	6	0.5804
ARSB	5:78883919:G:A	rs10942878	PR2	1f	0.22271
ARSB	5:78982406:A:G	rs672413	PR1	1f	0.55436
ARSB	5:78991756:T:G	rs336526	NR1	7	0.18412
VCAN	5:83536320:C:G	rs309560	PR1	1f	0.55436
GLRX	5:95812425:T:G	rs7700814	NR1	1b	0.77221
GLRX	5:95826771:G:A	rs10067881	PR1	1b	0.97052
GLRX	5:95827733:A:G	rs17462893	PR1	1b	0.54842
GLRX	5:95857813:G:A	rs6556891	NR2	1f	0.55436
RGMB	5:98603989:T:A	rs183143	NR2	6	0.42214
LAMA4	6:111632934:A:G	rs75681130	NR2	1f	0.55436
SMPDL3A	6:122666365:G:A	rs1344744	NR2	7	0.51392
SMPDL3A	6:122800327:A:G	rs13216278	PR1	1f	0.55436
SMPDL3A	6:122806846:A:G	rs9320892	PR2	6	0.17271
SMPDL3A	6:122909986:A:G	rs9490590	PR1	1f	0.22271
ARG1	6:131586748:C:T	rs41285340	PR1	4	0.70497
ARG1	6:131648251:C:T	rs17060499	PR1	7	0.51392
ARG1	6:131650967:C:T	rs112508647	PR2	1f	0.55324
CCN2	6:131968017:C:T	rs9493157	NR2	1f	0.55436
CCN2	6:131981651:C:A	rs233906	NR1	1f	0.55436
CCN2	6:132573847:C:A	rs73775123	PR1	7	0.18412
VNN2	6:132732448:G:A	rs6935500	PR2	7	0.51392
VNN2	6:132734473:G:C	rs764263	PR1	1f	0.55436
VNN2	6:132751511:A:G	rs1883617	NR1	1a	0.87619
CD83	6:14109329:G:A	rs62386711	NR1	1f	0.55436
LRP11	6:149622577:C:A	rs9322197	NR1	7	0.51392
LRP11	6:149645947:T:C	rs9718079	PR1	6	0.61
LRP11	6:149751359:C:T	rs9479810	PR1	1f	0.55436
LRP11	6:149829332:A:G	rs7764846	PR2	1f	0.55324
LRP11	6:149833364:C:T	rs7740784	NR2	6	0.28784
LRP11	6:149868038:T:A	rs2095376	PR2	1b	0.99173
LRP11	6:149891460:G:C	rs7756850	NR1	1f	0.55436
ULBP2	6:149975762:C:A	rs1951931	PR1	1f	0.55324
ULBP2	6:149977706:C:T	rs1853665	NR2	1f	0.22271
ULBP2	6:149985278:C:A	rs9384002	PR1	1f	0.55324
ULBP2	6:150409839:T:C	rs650597	NR1	4	0.70497
EZR	6:158214705:C:T	rs57389178	NR2	4	0.60906
SNX9	6:158440586:G:A	rs341119	PR1	1f	0.22271
EZR	6:158612020:G:A	rs12208498	NR2	1f	0.55436
SOD2	6:158902801:C:T	rs9347270	PR2	5	0.58955
IGF2R	6:160073489:C:T	rs2282140	PR1	1f	0.55436
IGF2R	6:160130454:C:T	rs112201728	PR1	1f	0.13154
GMPR	6:16280956:C:T	rs6914805	PR2	1f	0.22271
GMPR	6:16289417:T:C	rs79989301	PR1	1f	0.55436
RNASET2	6:166946616:G:A	rs2236312	PR2	1f	0.55324
RNASET2	6:167009324:A:C	rs239931	NR2	1f	0.55436
RNASET2	6:167036683:C:T	rs162293	NR1	7	0.51392
SMOC2	6:168394268:C:T	rs13198014	PR2	1f	0.22271
SMOC2	6:168395110:A:G	rs4401637	PR1	1f	0.22271
SMOC2	6:168409009:G:A	rs2763257	NR2	1d	0.07
SMOC2	6:168424579:C:T	rs4708467	NR1	7	0.51392
THBS2	6:169224606:C:A	rs78109196	NR1	1b	0.98333
DLL1	6:170287611:C:T	rs1884190	PR2	1f	0.66703
SCGN	6:24704310:T:C	rs1053598	NR1	1f	0.55436
BTN3A2	6:26353872:G:T	rs67509210	PR1	1f	0.51497
BTN3A2	6:26354552:A:C	rs9379851	PR2	1f	0.55436
BTN2A1	6:26355055:A:C	rs6933583	NR2	1f	0.55324
BTN2A1	6:26361202:C:T	rs4712981	NR1	1f	0.55436
BTN3A2	6:26365451:T:G	rs58825580	NR2	1f	0.55436
BTN3A2	6:26399358:C:T	rs6901118	PR2	1f	0.5151
BTN2A1	6:26457998:G:A	rs6907302	PR1	1f	0.66703
SERPINB1	6:2681879:A:G	rs78859830	NR2	1f	0.65007
SERPINB1	6:2835597:A:G	rs2293772	NR1	1b	0.36991
SERPINB9	6:2884804:T:C	rs6907075	NR2	1f	0.55436
SERPINB6	6:2956209:G:T	rs10900931	PR1	1f	0.22271
SERPINB6	6:2963175:A:C	rs6596925	NR1	1f	0.55324
MOG	6:29706041:T:C	rs4248137	NR2	1f	0.55436
MOG	6:29729740:A:G	rs1736919	NR1	1f	0.22917
MOG	6:29731044:T:C	rs1611350	NR2	1b	0.99522
DDR1	6:30153828:T:C	rs3734840	PR2	1f	0.55436
HLA-E	6:30490287:G:A	rs1264457	PR2	1f	0.55436
DDR1	6:30835477:A:T	rs3130649	PR1	1f	0.55436
DDR1	6:30835842:A:G	rs3131066	NR2	1f	0.55436
DDR1	6:30898565:C:G	rs2524236	NR1	1f	0.55436
CDSN	6:31081215:G:A	rs3132562	PR1	5	1
CDSN	6:31108206:A:G	rs9263632	PR2	1f	0.55436
CDSN	6:31118600:C:G	rs3130989	NR1	1f	0.55436
CDSN	6:31122513:C:T	rs3130994	NR2	1f	0.55436
MICB_MICA	6:31139116:A:G	rs1265094	NR1	1b	0.98331
CDSN	6:31173894:C:T	rs72856757	PR1	1f	0.66703
HLA-E	6:31239091:G:C	rs2894186	NR1	1f	0.55324
MICB_MICA	6:31374398:A:G	rs28626544	PR1	1b	0.98838
MICB_MICA	6:31379152:T:G	rs9266633	NR1	1f	0.55436
MICB_MICA	6:31380269:G:A	rs2844539	PR2	1f	0.55436
MICB_MICA	6:31398845:A:G	rs2428475	PR1	1f	0.72917
MICB_MICA	6:31410610:T:C	rs1063631	PR1	1f	0.22271
MICB_MICA	6:31429881:A:G	rs2516451	NR2	1f	0.22271
MICB_MICA	6:31446011:T:C	rs55716452	PR2	1f	0.71
MICB_MICA	6:31448248:G:A	rs2266161	PR2	1f	0.66419
MICB_MICA	6:31453520:A:G	rs2263316	PR1	1f	0.55436
LTA	6:31512356:C:T	rs2844497	NR1	1b	0.98331
TNXB	6:31557542:C:T	rs2239707	NR1	1f	0.55436
LTA	6:31572980:A:C	rs2229092	PR1	1f	0.55436
HSPA1A	6:31741572:C:T	rs1144709	PR1	1f	0.55436
C2	6:31878296:C:A	rs114400264	PR1	1f	0.55436
TNXB	6:31922683:A:T	rs9267676	PR2	1f	0.49667
C2	6:31947367:G:A	rs4151669	NR2	1f	0.55436
TNXB	6:32046798:A:G	rs2856448	NR2	1f	0.55436
C2	6:32788964:A:G	rs9276702	PR2	7	0.51392
MLN	6:33421117:C:G	rs114993678	PR2	1f	0.66703
MLN	6:33806617:C:A	rs2894342	NR2	7	0.51392
MLN	6:33807864:A:G	rs1547669	PR2	1b	0.5985
MLN	6:33811187:A:G	rs9394169	NR1	1f	0.22271
CLPS	6:35785450:T:C	rs2766588	PR1	1f	0.19902
CLPS	6:35852767:C:G	rs2395637	NR2	7	0.51392
MDGA1	6:36749248:C:T	rs35915709	PR1	4	0.60906
SERPINB6	6:3701443:A:G	rs73722528	NR1	7	0.51392
MDGA1	6:37657786:C:T	rs10755699	PR1	1f	0.55436
MDGA1	6:37695848:T:C	rs9349050	PR1	1f	0.55436
MDGA1	6:37704146:T:G	rs6937280	NR2	1f	0.55436
MDGA1	6:37706563:A:G	rs6938061	NR1	1f	0.55436
GLO1	6:38673578:C:T	rs6458065	NR2	1f	0.55436
GLO1	6:38682852:T:G	rs4746	PR1	1f	0.55324
GLO1	6:38703061:G:A	rs1049346	NR1	1f	0.55436
TREML2	6:41198081:C:T	rs13207171	NR1	1f	0.22271
TREML2	6:41200025:A:G	rs62396356	NR2	1f	0.55436
DNPH1	6:43185746:G:A	rs45553043	PR1	1f	0.55436
DNPH1	6:43219037:A:T	rs77379690	NR2	1f	0.66703
DNPH1	6:43249671:G:T	rs113461790	NR1	1f	0.11667
DNPH1	6:43325363:A:G	rs9472031	PR2	5	0.86083
VEGFA	6:43773103:C:T	rs3024987	NR2	1f	0.55436
VEGFA	6:43957026:G:A	rs4413611	PR1	1f	0.55436
VEGFA	6:43957870:G:A	rs6921438	NR1	1f	0.22271
VEGFA	6:43979661:T:C	rs1740073	PR1	4	0.60906
ENPP5	6:45850485:C:T	rs4711831	NR2	5	0.13454
ENPP5	6:46115200:C:T	rs995563	NR1	7	0.51392
ENPP5	6:46129146:T:C	rs1076738	PR1	1b	0.69
ENPP5	6:46129832:G:A	rs7754915	PR1	1f	0.55436
CD2AP	6:47040066:G:C	rs819506	PR2	1f	0.19549
CD2AP	6:47459545:T:A	rs1931833	NR2	1f	0.49667
CD2AP	6:47462031:C:A	rs9381562	PR1	1f	0.55436
CD2AP	6:47557466:G:A	rs6931011	PR2	1f	0.55324
CD2AP	6:47585666:G:A	rs9296567	NR1	1f	0.22271
CRISP2	6:49569572:C:T	rs9395512	PR1	1f	0.02154
CRISP2	6:49711004:G:A	rs687777	PR1	1f	0.67917
CRISP2	6:49742392:G:A	rs555247	NR1	1d	0.33833
CRISP2	6:49779749:T:C	rs489184	PR2	6	0.20133
GSTA3	6:52739150:T:C	rs2144693	PR1	1f	0.64667
GSTA3	6:52764200:C:T	rs4715316	NR2	7	0.51392
GSTA1	6:52777970:C:T	rs2608652	NR1	1f	0.55436
GSTA1	6:52782806:A:C	rs9367494	PR1	1f	0.55436
GSTA1	6:52793393:A:G	rs4147614	NR2	1f	0.22271
GSTA1	6:52795462:C:T	rs9463833	PR2	7	0.51392
ADGRB3	6:68900389:G:A	rs2342761	NR1	7	0.51392
ADGRB3	6:68956792:A:G	rs1932618	PR1	7	0.18412
ADGRB3	6:68961693:A:G	rs3798969	PR2	6	0
ADGRB3	6:68968025:A:G	rs1953613	PR1	4	0.60906
ADGRB3	6:69075592:T:C	rs9446091	PR1	4	0.60906
ADGRB3	6:69153783:G:A	rs2880593	PR2	6	0
ADGRB3	6:69178281:A:T	rs779492	NR2	5	0.58955
COL9A1	6:70469082:G:A	rs35516318	NR1	7	0.51392
CD109	6:73714632:C:A	rs9293938	PR1	1f	0.55436
CD109	6:73774414:A:G	rs7771585	PR2	1f	0.55436
CD109	6:73784654:C:T	rs9442963	PR1	1f	0.55436
NT5E	6:85379229:C:T	rs9450260	NR2	7	0.51392
NT5E	6:85404578:C:A	rs313204	PR1	1f	0.55436
NT5E	6:85405469:C:A	rs1665787	NR1	1f	0.70823
NT5E	6:85405564:G:C	rs637346	PR2	1f	0.55436
NT5E	6:85489515:A:G	rs2229523	NR2	1f	0.22271
NT5E	6:85696953:T:C	rs6903114	PR2	7	0.51392
NT5E	6:86152161:T:G	rs220420	PR1	1f	0.22271
CNPY4	7:100137558:A:G	rs7341389	NR2	1f	0.55436
CNPY4	7:100203733:C:T	rs138129781	PR1	1f	0.66917
CNPY4	7:100217485:C:T	rs73161728	NR1	1f	0.66703
PILRB	7:100334426:C:T	rs7384878	NR1	1f	0.22271
PILRB	7:100373690:T:C	rs2405442	PR1	1f	0.55436
SERPINE1	7:101139179:G:A	rs1050955	PR1	1f	0.55436
NRCAM	7:108321010:G:A	rs66526866	NR1	1f	0.55324
NRCAM	7:108339799:C:T	rs6942944	PR2	1f	0.55324
NRCAM	7:108350375:A:G	rs17334792	PR1	5	0.58955
GPR37	7:124456673:C:A	rs6973149	PR1	1f	0.22271
GPR37	7:124490162:A:G	rs7796239	PR2	1f	0.66703
GPR37	7:124704047:A:G	rs10263554	PR1	7	0.18412
GPR37	7:124728249:C:T	rs17147398	NR2	5	0.58955
CPA2	7:130203031:G:C	rs112690409	PR1	5	0.58955
CPA2	7:130252021:A:G	rs4389873	NR2	6	0.16705
PODXL	7:130891419:C:T	rs157920	NR2	1f	0.55436
CLEC5A	7:141660785:A:G	rs3800989	NR2	1f	0.22271
CLEC5A	7:141884384:A:G	rs13235900	NR1	7	0.51392
CLEC5A	7:142150075:A:G	rs28503717	PR2	7	0.51392
EPHB6	7:142812665:G:A	rs17268	NR2	1b	0.92
PRSS2	7:142839984:T:C	rs6974748	NR2	7	0.51392
EPHB6	7:142854785:A:G	rs7789303	NR1	4	0.60906
EPHB6	7:142856383:A:G	rs8177107	PR1	1f	0.55436
EPHB6	7:142857489:A:G	rs1009848	PR2	1f	0.76
CNTNAP2	7:145494136:C:T	rs62504997	NR2	7	0.51392
CNTNAP2	7:145495027:C:T	rs10441203	NR1	7	0.51392
CNTNAP2	7:145636777:G:A	rs850459	PR1	6	0.20689
DPP6	7:153638164:C:A	rs60433646	NR2	7	0.18412
PDGFA	7:251515:G:A	rs150865472	NR1	1f	0.55436
CPVL	7:29120988:C:T	rs34219043	PR1	1f	0.55436
CPVL	7:29131839:T:C	rs245861	PR2	1f	0.22271
CPVL	7:29141643:G:T	rs245868	PR1	1f	0.55324
MAD1L1	7:3178422:C:G	rs12700663	PR1	1f	0.22271
NT5C3A	7:33063693:A:C	rs34307182	PR1	1f	0.55436
IGFBP3	7:45921046:G:C	rs2854746	NR1	1f	0.55436
IGFBP3	7:45921476:G:T	rs2854744	NR2	1f	0.55436
IGFBP3	7:46128338:C:G	rs1486163	PR1	7	0.51392
VWC2	7:49370435:C:T	rs74360319	NR1	7	0.18412
VWC2	7:49775794:C:G	rs769604	PR1	1f	0.55436
VWC2	7:49778721:T:G	rs481076	NR1	1f	0.55436
VWC2	7:49781123:T:C	rs17632348	PR1	1f	0.55436
DDC	7:50545208:G:A	rs7786398	NR1	1f	0.55436
SUMF2	7:56284828:C:T	rs9642412	PR2	7	0.51392
SUMF2	7:56293945:C:T	rs1962353	PR1	7	0.51392
SUMF2	7:56612386:C:T	rs12537872	PR2	1f	0.55436
LAT2	7:73463714:T:G	rs35797675	NR1	6	0.42214
LAT2	7:73652568:T:A	rs111765174	NR2	1f	0.55436
LAT2	7:74342455:T:C	rs4717134	NR1	1f	0.22271
CCL26	7:75805330:C:T	rs61140824	PR2	1f	0.08
CCL24	7:75822339:G:A	rs7802169	NR1	1f	0.55436
CCL24	7:75824816:G:A	rs7780649	NR2	6	0.1934
CCL24	7:75825772:G:A	rs7785567	PR2	7	0.51392
CCL24	7:75831075:A:G	rs2024050	PR2	1b	1
CCL24	7:75831703:C:A	rs113774457	PR1	1f	0.55436
CCL24	7:75840133:T:C	rs6467885	PR1	1f	0.55324
CCL24	7:75848924:C:T	rs73359750	PR2	7	0.51392
CCL24	7:75858694:C:A	rs73150133	PR1	2b	0.8292
CCL26	7:75929707:C:T	rs34221172	NR1	1b	0.95727
HSPB1	7:76294901:G:T	rs2908203	PR2	1f	0.55436
SSC4D	7:76408093:C:T	rs75224131	PR1	1f	0.66703
ADAM22	7:87615644:C:T	rs13233308	PR1	1f	0.55324
ADAM22	7:87762445:A:G	rs7779623	NR2	1f	0.55324
ADAM22	7:87935182:C:G	rs2279542	PR2	1a	0.39
ADAM22	7:88098460:A:G	rs35532369	NR1	7	0.18412
ADAM22	7:88129775:T:G	rs9641023	NR2	6	0.15
ADAM22	7:88132143:T:G	rs989616	PR2	6	0.33117
PON3	7:95326216:C:T	rs757158	PR1	7	0.51392
PON3	7:95354042:C:T	rs10953142	NR2	1f	0.12
PON3	7:95409499:G:A	rs2057965	PR2	7	0.51392
CNPY4	7:99908525:G:C	rs34395561	NR2	1f	0.55324
CTSB	8:11770620:A:C	rs904009	PR2	1f	0.55436
CTSB	8:11835129:C:T	rs1293322	PR1	1f	0.55436
CTSB	8:11849518:A:G	rs2740593	NR2	1b	0.86517
CTSB	8:11852792:A:G	rs1293291	NR1	1f	0.55436
TNFRSF11B	8:119143352:C:T	rs13257113	NR2	7	0.51392
CCN3	8:119454939:G:A	rs4871221	NR1	1f	0.04
CCN3	8:119463308:A:C	rs4305931	NR1	1f	0.22271
ENPP2	8:119641985:T:G	rs13267597	PR1	1f	0.55436
ENPP2	8:119676204:G:A	rs7463925	PR2	1f	0.55436
ENPP2	8:119711052:A:G	rs7005200	NR1	1f	0.74917
ENPP2	8:119733117:C:A	rs13261032	NR2	6	0.0875
CCN4	8:133160946:A:G	rs11785464	PR1	1b	0.988
CCN4	8:133190699:C:A	rs2013158	NR1	2b	0.78832
CCN4	8:133191793:G:C	rs55884058	PR2	1f	0.66703
CCN4	8:133192215:A:G	rs12156037	NR2	1f	0.13817
CCN4	8:133233509:G:C	rs7844482	NR2	1b	0.68
CCN4	8:133234884:G:A	rs13263504	PR1	1f	0.66703
CCN4	8:133237922:A:G	rs1049697	NR1	2b	0.88523
LY6D	8:142764296:T:C	rs7816480	PR2	1f	0.55436
LY6D	8:142806152:G:T	rs11774823	NR2	1f	0.55436
LY6D	8:142816466:A:G	rs2717586	NR1	1f	0.55436
LY6D	8:143231654:T:C	rs6558336	NR1	1a	0.43792
MSR1	8:16178676:C:A	rs33934232	NR1	7	0.51392
MSR1	8:16180494:T:C	rs73665251	PR1	1f	0.55436
MSR1	8:16193364:T:G	rs28662097	PR2	1f	0.55324
LPL	8:19962213:C:G	rs328	PR1	1f	0.22271
LPL	8:19989069:C:A	rs139894713	NR2	6	0.27
TNFRSF10B	8:23001794:G:A	rs2430807	NR2	4	0.60906
TNFRSF10B	8:23027818:A:T	rs2293400	NR1	1f	0.55436
TNFRSF10B	8:23037164:A:G	rs4268127	PR2	4	0.60906
TNFRSF10A	8:23038544:A:G	rs4395897	PR1	1f	0.67917
TNFRSF10C	8:23070183:T:C	rs4871845	PR1	1f	0.55436
TNFRSF10C	8:23074609:A:C	rs11784599	PR2	1f	0.55436
TNFRSF10C	8:23087574:A:G	rs6983885	NR1	1b	0.57517
TNFRSF10A	8:23183754:G:A	rs4871855	NR2	1f	0.55324
TNFRSF10A	8:23200707:T:G	rs20576	NR1	1f	0.66703
TNFRSF10A	8:23201767:G:T	rs4872078	PR1	1f	0.19549
TNFRSF10A	8:23210773:A:G	rs13255997	NR1	1f	0.8353
TNFRSF10A	8:23216289:C:G	rs6557638	PR2	1f	0.55324
TNFRSF10A	8:23225458:G:T	rs13278062	NR2	1f	0.55436
TNFRSF10A	8:23226033:T:C	rs13255394	PR1	1f	0.66703
TNFRSF10A	8:23231695:G:A	rs62501135	NR1	1f	0.23917
TNFRSF10C	8:23611575:C:T	rs11135759	PR1	7	0.51392
SCARA5	8:27922028:C:T	rs10103504	NR1	1f	0.55436
SCARA5	8:27947698:G:A	rs13266176	PR2	1f	0.55436
SCARA5	8:27947867:G:A	rs2685422	PR1	1b	0.68
SFRP1	8:41148455:G:C	rs79649393	NR2	1f	0.22271
PLAT	8:41357812:T:C	rs2354571	PR1	1f	0.55324
GGH	8:63012235:A:C	rs12682112	PR2	1b	0.98882
GGH	8:63113775:C:G	rs4275222	NR2	1f	0.22271
DEFA1_DEFA1B	8:6971259:T:C	rs12682063	NR1	1f	0.22271
DEFA1_DEFA1B	8:7023403:A:G	rs7826487	PR1	1f	0.22271
PAG1	8:80407129:C:A	rs879696	NR1	5	0.58955
FABP4	8:82381661:T:C	rs79812534	PR1	1b	0.68148
CA1	8:85566647:T:A	rs183099	PR1	7	0.51392
CALB1	8:89802585:A:G	rs73293110	PR1	1f	0.03
CDH17	8:93341957:C:T	rs277777	NR1	4	0.60906
MSRA	8:9782516:G:C	rs74891397	PR2	1f	0.55436
MATN2	8:97978993:A:G	rs1869609	PR2	1f	0.22271
MATN2	8:97996963:A:G	rs10098159	PR1	1d	0.94
TNC	9:115028646:A:C	rs34810955	PR2	6	0.90619
MEGF9	9:120606049:G:A	rs4837785	NR2	6	0.21138
ENG	9:127839297:C:T	rs41476651	NR2	1f	0.55436
ENG	9:127846259:G:A	rs41475247	PR1	1f	0.55436
KYAT1	9:128889687:G:A	rs9409309	NR2	7	0.51392
KYAT1	9:129168498:C:G	rs17439917	NR1	1a	0.98
NCS1	9:130988383:A:G	rs12005819	NR1	4	0.60906
ABL1	9:131767109:C:A	rs2320390	NR2	5	0.48867
OBP2B	9:133205098:G:T	rs10901246	PR1	1f	0.66703
OBP2B	9:133210436:G:A	rs3761822	PR2	1f	0.55436
FCN2	9:134860694:A:T	rs57136797	NR1	1b	0.69
FCN2	9:134879836:A:G	rs3124952	PR1	1f	0.02937
FCN2	9:134884873:A:T	rs12685659	NR2	1f	0.22271
PAEP	9:135575920:A:C	rs783768	PR1	1f	0.22271
PTGDS	9:136922428:T:C	rs10781523	NR1	1b	0.22533
PTGDS	9:136971795:T:G	rs11790360	PR1	1b	1
NPDC1	9:137028813:A:G	rs4880189	NR1	1f	0.55436
NPDC1	9:137046201:C:A	rs28705707	NR1	1f	0.70823
DPP7	9:137111464:G:A	rs72763269	PR1	1f	0.55436
NPDC1	9:137496449:C:T	rs79412465	PR1	1f	0.22271
PSIP1	9:16088253:C:G	rs145275119	PR1	6	0.53625
TEK	9:27197488:G:T	rs35030851	NR2	5	0.58955
TEK	9:27201553:T:G	rs117982767	PR2	7	0.18412
TEK	9:27214581:T:C	rs117132173	PR1	7	0.18412
B4GALT1	9:33103175:G:T	rs544723	NR2	1b	0.50217
SPINK4	9:33234041:A:G	rs1630171	PR2	1f	0.55436
SPINK4	9:33236166:A:G	rs1702669	PR1	1b	0.86517
SPINK4	9:33237767:T:G	rs496752	NR1	1f	0.55436
IGFBPL1	9:38381311:G:T	rs10973772	NR2	1f	0.66703
IGFBPL1	9:38381794:A:G	rs7873652	PR2	1f	0.55436
IGFBPL1	9:38409084:G:A	rs7857243	NR2	1f	0.55436
CD274	9:5451557:C:T	rs822338	NR1	1b	0.68148
CD274	9:5453260:A:G	rs822340	PR2	1f	0.55436
CD274	9:5461729:G:A	rs10114060	NR2	7	0.51392
PDCD1LG2	9:5474598:G:A	rs10975128	NR2	6	0.17375
PDCD1LG2	9:5514839:T:C	rs2381282	PR2	1f	0.55324
PDCD1LG2	9:5515990:G:C	rs62556118	PR1	1f	0.66703
GCNT1	9:76489891:T:C	rs503222	NR1	1f	0.05
GCNT1	9:76491736:C:G	rs2093839	PR2	1f	0.55324
GCNT1	9:76503413:G:A	rs1057406	PR1	1f	0.22271
OGN	9:92258632:A:G	rs10120980	PR1	1f	0.39752
OGN	9:92268862:T:C	rs12353096	NR1	1f	0.55436
OGN	9:92293147:A:T	rs10820966	NR2	1f	0.55436
OGN	9:92302280:G:C	rs6479417	PR2	7	0.51392
CTSV	9:97390259:A:G	rs7869536	PR1	1f	0.55436

## Sheet: S Table 4
S Table 4. Variance explained by the top cis-pQTLs across all contexts for each of the 630 proteins associated with at least one cis-pQTL.
Abbreviations: phenotype_id = HGNC symbol of the tested protein; variant_id = chr:hg38pos:ref.allele:alt.allele; pval_nominal = nominal p-value of the regression coefficient of the variant_id; slope = regression coefficient of the variant_id; slope_se = standard error of slope; qval = q-value based on DFR = 0.05; explained.variance = percentage of explained variance attributed to a particular cis…
phenotype_id	variant_id	pval_nominal	slope	slope_se	qval	explained.variance	context
DKKL1	19:49357995:G:A	8.07137e-55	-1.26538	0.0549808	3.12964e-44	0.761664	NR2
LILRB5	19:54255803:T:C	1.91525e-58	-1.2401	0.0500763	3.00773e-48	0.747341	PR2
DKKL1	19:49357995:G:A	8.40676e-54	-1.24158	0.0546528	7.80084e-44	0.740252	PR1
LILRB5	19:54255803:T:C	5.48307e-50	-1.22124	0.0579726	2.91445e-41	0.736222	NR1
DKKL1	19:49357995:G:A	4.71815e-52	-1.22809	0.0555107	3.15512e-42	0.724254	PR2
LILRB5	19:54255803:T:C	2.75047e-54	-1.20473	0.0525775	5.3027e-45	0.705317	PR1
CEACAM21	19:41577830:G:C	1.74987e-42	-1.40575	0.0765543	1.69122e-33	0.695122	PR1
LILRB5	19:54255803:T:C	1.35671e-46	-1.18093	0.0595851	2.42127e-38	0.688422	NR2
PNLIPRP2	10:116638373:A:G	9.72329e-55	1.1725	0.0510171	3.12964e-44	0.679406	NR2
CEACAM21	19:41577830:G:C	1.76685e-42	-1.3872	0.0752679	1.51892e-33	0.676898	PR2
MEP1B	18:32217995:T:C	1.97392e-43	-1.16348	0.0624076	9.80869e-35	0.67428	NR2
DKKL1	19:49357995:G:A	6.96937e-56	-1.18791	0.050795	7.08001e-46	0.671257	NR1
CAPG	2:85394936:T:C	1.75402e-51	-1.15773	0.0528757	1.28774e-40	0.662068	PR2
MICB_MICA	6:31441325:T:G	1.61e-39	-1.17834	0.0681905	7.14951e-29	0.646667	PR1
CD33	19:51215061:T:A	1.57872e-38	1.16128	0.0683961	4.36221e-31	0.646173	PR2
PNLIPRP2	10:116638373:A:G	2.04899e-43	1.13791	0.061168	2.88931e-35	0.639911	NR1
MICB_MICA	6:31410610:T:C	7.13758e-41	-1.16565	0.0653546	1.41177e-29	0.634657	PR2
PDCD6	5:244828:C:T	3.94918e-38	-1.55688	0.093087	4.11644e-29	0.61373	NR2
CD33	19:51215061:T:A	4.71847e-40	1.12859	0.064589	1.60627e-33	0.610305	PR1
PDGFRB	5:150128912:C:T	6.50309e-48	1.1089	0.0546909	1.89135e-38	0.604724	NR1
MDGA1	6:37706563:A:G	1.63161e-47	-1.09944	0.0546306	9.94685e-38	0.604368	NR1
PNLIPRP2	10:116635040:G:C	5.06714e-47	1.09445	0.0545511	5.51588e-38	0.596546	PR1
PNLIPRP2	10:116635040:G:C	3.54907e-50	1.09294	0.0511271	4.36645e-40	0.594901	PR2
ENPP7	17:79731780:A:C	3.75773e-47	1.13848	0.0566063	9.17371e-39	0.594331	PR1
CEACAM21	19:41581783:G:A	8.15417e-38	-1.25189	0.0753565	5.73876e-30	0.593692	NR2
CEACAM21	19:41581783:G:A	2.53372e-38	-1.24947	0.074519	1.03148e-30	0.591399	NR1
MDGA1	6:37704146:T:G	3.99565e-45	-1.08353	0.0562299	2.62267e-36	0.58688	NR2
SIRPA	20:1914887:T:C	1.98089e-59	-1.19828	0.0475777	1.46586e-48	0.58561	PR2
MEP1B	18:32217995:T:C	6.34631e-40	-1.07273	0.0618696	1.93377e-31	0.573196	NR1
SIRPA	20:1914887:T:C	3.82368e-60	-1.18277	0.0466592	1.50503e-49	0.570549	PR1
LY75	2:159903827:G:A	1.38427e-35	1.08735	0.0685147	1.59541e-26	0.565237	PR1
CD33	19:51215061:T:A	6.60038e-43	1.07296	0.0581526	4.24996e-35	0.559136	NR2
TDGF1	3:46576012:T:C	3.48224e-32	1.18033	0.0802352	4.87395e-24	0.552062	PR2
CAPG	2:85399458:A:T	1.01606e-46	-1.05497	0.0528865	2.8912e-37	0.548412	PR1
LY75	2:159897539:T:C	9.84467e-34	1.07454	0.0704204	2.84927e-25	0.548058	PR2
KLK12	19:51031874:A:G	5.91298e-29	-1.07328	0.0792506	1.92943e-22	0.546773	PR1
CD33	19:51215061:T:A	1.03745e-40	1.05803	0.0600428	2.4971e-32	0.543684	NR1
ENPP7	17:79731780:A:C	3.1501e-44	1.08606	0.0569073	1.59552e-36	0.54086	PR2
MEP1B	18:32224900:T:A	2.89702e-41	-1.04183	0.0581535	3.55898e-33	0.540191	PR1
KLK12	19:51031874:A:G	1.38622e-25	-1.09954	0.0890734	8.69332e-20	0.539378	NR2
PILRB	7:100334426:C:T	8.15244e-53	1.12705	0.0508498	5.50182e-41	0.538646	NR1
HDGF	1:156730859:T:G	1.50389e-45	1.13327	0.0581011	1.26542e-36	0.535058	PR1
MDGA1	6:37695848:T:C	2.7306e-42	-1.03338	0.0564946	1.08961e-33	0.533571	PR1
PDGFRB	5:150135511:G:A	4.93992e-38	1.03099	0.0613716	4.02148e-30	0.53029	PR2
PILRB	7:100334426:C:T	2.53271e-49	1.11767	0.0535902	2.43409e-38	0.529717	NR2
ACP6	1:147656899:A:G	3.87741e-35	-1.12397	0.0715371	5.0247e-27	0.528996	PR1
MICB_MICA	6:31410610:T:C	8.56399e-42	-1.07448	0.0596517	7.949e-30	0.527931	NR1
KLK12	19:51031874:A:G	6.50768e-28	-1.08603	0.0826744	2.20891e-21	0.526205	NR1
TDGF1	3:46577748:T:A	3.12006e-30	1.15214	0.0823644	7.30168e-23	0.526007	PR1
MICB_MICA	6:31410610:T:C	5.03522e-40	-1.06881	0.0614124	2.20105e-28	0.522374	NR2
HDGF	1:156734821:G:A	8.59787e-46	1.09743	0.0562251	6.9732e-37	0.522346	NR2
HDGF	1:156734821:G:A	9.71227e-49	1.09236	0.0530563	4.59021e-39	0.51753	NR1
PDCD6	5:199300:G:A	4.40354e-33	-1.42896	0.0957377	7.13917e-25	0.51702	NR1
IFNGR2	21:33424249:C:T	1.4376e-34	1.62169	0.104556	3.49864e-27	0.514717	PR1
ACP6	1:147656899:A:G	2.06409e-36	-1.10707	0.0682752	5.06766e-28	0.513207	PR2
CTSH	15:78938395:G:T	6.50913e-22	1.52527	0.137615	5.01494e-16	0.511191	PR1
IFNGR2	21:33415005:A:G	4.20359e-42	1.59468	0.0871871	5.40517e-33	0.508062	PR2
MEP1B	18:32217995:T:C	1.02481e-37	-1.00912	0.0604824	1.41177e-29	0.506426	PR2
CAPG	2:85394936:T:C	6.57167e-41	-1.0207	0.0575916	4.2094e-32	0.504133	NR2
SNCG	10:86960032:C:G	3.12023e-47	-1.14908	0.0568038	6.32088e-37	0.503673	PR2
PDGFRB	5:150135511:G:A	3.14874e-39	1.0034	0.0584229	2.42208e-31	0.502288	PR1
BST1	4:15645451:A:G	2.40947e-30	-1.53327	0.109706	3.92594e-23	0.498346	NR1
SIRPA	20:1914887:T:C	1.53745e-50	-1.07839	0.0505681	5.85582e-41	0.495447	NR2
BST1	4:15645451:A:G	1.47609e-30	-1.52725	0.108571	2.44466e-23	0.49444	NR2
LY75	2:159905297:T:C	5.58743e-39	1.02261	0.0600528	2.62895e-29	0.493769	NR2
SIRPA	20:1914887:T:C	2.64931e-59	-1.07617	0.0434138	1.53333e-47	0.493409	NR1
CD300LF	17:74705815:A:G	1.52655e-50	1.39954	0.0650291	4.81609e-41	0.490095	PR2
IFNGR2	21:33415005:A:G	7.28629e-35	1.52975	0.0982527	7.51847e-27	0.486921	NR2
BST1	4:15645451:A:G	4.62523e-29	-1.32397	0.0972606	3.47103e-22	0.482825	PR2
IFNGR2	21:33415005:A:G	5.68317e-37	1.51422	0.0929623	7.53987e-29	0.477085	NR1
FCGR2A	1:161495630:A:G	1.26287e-53	-1.23927	0.0547225	3.27068e-43	0.474805	PR1
ADGRB3	6:68961693:A:G	3.07998e-33	-1.05924	0.0707109	6.84331e-25	0.471236	NR1
TLR3	4:186082920:C:T	4.43562e-31	-1.07536	0.0754734	4.25439e-24	0.470907	NR2
HDGF	1:156730859:T:G	3.43708e-38	1.06184	0.0629944	3.64372e-30	0.469735	PR2
TLR3	4:186082920:C:T	3.36616e-31	-1.07175	0.0750947	1.42686e-24	0.467751	NR1
PILRB	7:100373690:T:C	4.66696e-50	1.12825	0.0528948	1.71118e-39	0.465479	PR2
CD300LF	17:74703694:T:C	3.23369e-61	1.31912	0.051399	6.57208e-50	0.465301	NR2
PILRB	7:100373690:T:C	6.78969e-54	1.12668	0.0495138	1.59091e-42	0.464185	PR1
PDGFRB	5:150135511:G:A	2.65669e-40	0.966825	0.0552351	1.69964e-32	0.460873	NR2
TLR3	4:186082920:C:T	9.16977e-33	-1.10968	0.0746025	1.3191e-25	0.460155	PR1
CAPG	2:85394936:T:C	4.43043e-44	-0.97461	0.0517116	7.22685e-35	0.459632	NR1
CD300LF	17:74705815:A:G	2.17808e-50	1.35352	0.0633602	2.94707e-41	0.458394	PR1
LGALS8	1:236588889:C:T	1.49147e-27	1.01736	0.0781868	5.28901e-21	0.456416	NR1
ACP6	1:147652507:T:G	2.13209e-30	1.03641	0.0740585	3.19313e-23	0.455491	NR1
MDGA1	6:37695848:T:C	5.76159e-40	-0.954279	0.0545216	2.82326e-31	0.455012	PR2
FCGR2A	1:161506415:A:G	1.03181e-52	-1.16904	0.05284	3.66612e-42	0.453862	NR1
CD300LF	17:74703694:T:C	1.94661e-56	1.30273	0.0551754	1.79362e-46	0.45381	NR1
ACP6	1:147652507:T:G	5.20731e-31	1.0343	0.072715	1.48154e-23	0.453639	NR2
CTSH	15:78938395:G:T	2.0396e-19	1.43263	0.14028	4.72605e-14	0.45098	PR2
FCGR2A	1:161506415:A:G	1.3782e-47	-1.16021	0.0574532	2.42127e-38	0.447031	NR2
FCRL3	1:157696854:T:C	4.69402e-29	0.956763	0.0704655	1.86337e-22	0.446406	PR1
MSMB	10:46046324:T:C	9.02445e-43	0.948752	0.0513702	1.65514e-33	0.441071	PR1
ADGRB3	6:68961693:A:G	2.3709e-26	-1.0281	0.0811864	4.6614e-19	0.440357	PR2
ENPP7	17:79723327:A:G	4.77774e-26	1.02453	0.0819322	5.2948e-20	0.434275	NR2
MSMB	10:46046324:T:C	1.57805e-37	0.94075	0.0566145	3.4885e-29	0.433663	PR2
CD6	11:61009309:T:C	3.60785e-30	-0.949055	0.0677831	6.546e-23	0.430601	PR2
IL18R1	2:102398236:C:T	8.47706e-31	-1.07011	0.0752414	1.96394e-23	0.427923	PR2
CD6	11:61008737:C:T	9.90184e-34	-0.947053	0.06242	3.19096e-26	0.427651	NR2
FCRL3	1:157698600:T:C	6.75403e-24	0.933841	0.0794944	4.93262e-18	0.427039	NR1
TXNDC15	5:134887903:A:G	1.19838e-19	1.63422	0.159208	3.66325e-14	0.425061	NR2
FCRL3	1:157699488:C:T	1.74602e-23	0.935762	0.0805694	1.14362e-17	0.422903	NR2
TLR3	4:186082920:C:T	5.95979e-30	-1.06289	0.0763307	3.79121e-23	0.422168	PR2
SNCG	10:86966227:A:G	1.13757e-49	1.05147	0.0498748	6.376e-40	0.421737	PR1
PDCD6	5:199300:G:A	2.13092e-29	-1.49938	0.1092	7.13882e-22	0.421515	PR2
CD200R1	3:112921689:G:A	3.92956e-23	1.88213	0.163491	3.47455e-17	0.417154	PR1
KLK12	19:51031874:A:G	1.59397e-24	-0.935241	0.0777889	1.00433e-18	0.415172	PR2
PDCD6	5:199300:G:A	9.1929e-32	-1.4825	0.102076	4.883e-24	0.412077	PR1
SMPDL3A	6:122800327:A:G	1.39349e-23	-1.19543	0.102718	2.34636e-17	0.411447	NR1
ENPP7	17:79732746:T:C	1.76831e-26	0.93218	0.0737422	1.08704e-20	0.411342	NR1
ADAM15	1:155060832:G:A	2.32649e-27	1.01969	0.0785136	7.29139e-21	0.409526	PR1
TDGF1	3:46575847:G:A	5.29596e-25	1.02688	0.0845702	3.66552e-18	0.407317	NR2
LRRN1	3:3765908:T:C	5.38851e-32	0.943204	0.0647515	2.96491e-25	0.405465	NR2
CHIT1	1:203218965:G:A	8.94679e-29	-1.08908	0.0809785	7.05271e-23	0.404333	NR2
BST1	4:15645451:A:G	9.42545e-25	-1.21131	0.100284	1.76423e-18	0.404151	PR1
CD6	11:61008737:C:T	1.26577e-32	-0.920242	0.0623204	5.01052e-25	0.40378	NR1
TDGF1	3:46575847:G:A	3.32919e-24	1.02217	0.0862311	1.17842e-17	0.403589	NR1
SPINK4	9:33237767:T:G	1.22898e-25	1.10161	0.0891988	5.37754e-19	0.403014	NR1
SMPDL3A	6:122800327:A:G	1.71779e-20	-1.17949	0.111651	6.95578e-15	0.400548	NR2
FCGR2A	1:161495630:A:G	1.31696e-49	-1.13801	0.0537999	9.25004e-40	0.400383	PR2
XCL1	1:168552377:G:A	4.70113e-23	1.03352	0.0899901	2.92386e-17	0.399159	PR1
ADGRB3	6:68961693:A:G	6.32723e-28	-0.974123	0.0740504	8.75728e-21	0.398545	NR2
SPINK4	9:33234041:A:G	2.98513e-19	1.19533	0.117731	5.08858e-14	0.393558	PR2
LY75	2:159889274:G:T	1.16378e-28	0.915341	0.0683382	2.34211e-21	0.393541	NR1
IL18R1	2:102398236:C:T	4.97879e-29	-1.02572	0.0755937	6.8227e-22	0.393157	PR1
MSMB	10:46046324:T:C	4.87949e-28	0.886514	0.0672652	5.28901e-21	0.392861	NR1
LRIG1	3:66394273:A:C	1.1799e-19	-0.936609	0.0912915	4.81366e-14	0.389883	NR1
FCRL3	1:157699203:C:T	1.17481e-24	0.897258	0.074342	1.74299e-18	0.389781	PR2
CHIT1	1:203218965:G:A	3.46402e-28	-1.06839	0.0807506	1.50816e-22	0.389116	NR1
LRRN1	3:3765908:T:C	4.53644e-26	0.905791	0.0720898	1.41368e-19	0.388458	PR2
CCL16	17:35980421:T:C	3.33103e-28	-1.50293	0.113418	6.18769e-22	0.387931	NR2
LTA	6:31572980:A:C	1.22231e-21	-1.59931	0.145315	3.04371e-14	0.38145	PR2
LRIG1	3:66394273:A:C	1.84115e-19	-0.926171	0.0908172	4.49792e-14	0.381241	NR2
GPC5	13:91768734:A:G	1.32094e-24	-0.992017	0.0827157	1.4945e-18	0.380129	NR1
DPEP1	16:89665830:C:T	6.31135e-18	0.876908	0.0907787	3.37391e-12	0.379836	PR1
TXNDC15	5:134887903:A:G	5.25569e-20	1.54086	0.148385	1.31316e-14	0.377882	NR1
UMOD	16:20353266:A:G	1.61451e-20	-1.03999	0.0983572	6.2343e-15	0.374905	NR2
LGALS8	1:236596664:G:T	8.00014e-23	0.954446	0.0838434	3.08602e-17	0.372963	NR2
CTSH	15:78954000:T:A	1.84758e-22	-1.07581	0.0955719	1.64487e-16	0.370357	NR2
MSMB	10:46046324:T:C	1.64445e-28	0.857416	0.06419	1.30613e-21	0.367494	NR2
CCL16	17:35980421:T:C	7.94655e-26	-1.46087	0.117664	6.12606e-20	0.366522	NR1
CLEC7A	12:10118488:A:C	4.00517e-32	-1.76149	0.119916	1.47477e-24	0.365391	PR2
IL18R1	2:102373274:A:G	9.81283e-32	-1.02215	0.07061	2.76622e-24	0.365107	NR2
LRIG1	3:66384219:T:C	2.78477e-24	-0.936995	0.0784902	3.80668e-18	0.363881	PR2
IL18R1	2:102373274:A:G	1.64614e-30	-1.01731	0.0724924	1.13155e-22	0.361657	NR1
DPEP1	16:89665830:C:T	7.7388e-18	0.855536	0.088741	3.35411e-12	0.361547	PR2
CHIT1	1:203222738:C:T	8.47449e-27	-1.04388	0.0816044	1.84462e-20	0.360829	PR1
CCL24	7:75831075:A:G	6.37439e-21	-1.32296	0.123454	3.90148e-15	0.357295	NR2
IL17RB	3:53842191:A:G	3.42728e-23	-0.880494	0.0765512	2.41223e-17	0.356797	NR1
CTSH	15:78949929:A:G	8.35088e-23	-1.07123	0.0942381	6.53721e-17	0.356483	NR1
IL1RAP	3:190616826:C:T	3.86514e-25	-1.28473	0.105186	4.15609e-19	0.356181	PR1
CHIT1	1:203222738:C:T	1.0446e-24	-1.03033	0.085241	1.27754e-18	0.351522	PR2
CD200R1	3:112921689:G:A	5.32882e-22	1.72159	0.154631	2.2427e-16	0.349025	PR2
CCL24	7:75840133:T:C	5.8659e-19	-1.37645	0.136997	9.08124e-14	0.347362	PR2
IL1RAP	3:190622388:A:C	2.03996e-25	-1.25559	0.101782	2.76239e-19	0.346406	PR2
DPEP1	16:89626782:A:G	7.59932e-22	0.852294	0.0771915	1.00232e-15	0.34471	NR2
SFTPD	10:79951311:C:G	4.80151e-17	-1.03289	0.110465	3.97622e-12	0.340053	PR2
TMPRSS5	11:113681890:C:G	3.80123e-19	0.871863	0.0861925	7.61753e-14	0.340024	PR2
PILRA	7:100334426:C:T	1.94642e-41	0.894897	0.0500405	7.7882e-32	0.339596	NR1
LGALS8	1:236582456:A:G	2.71448e-21	0.860444	0.0791967	1.18919e-15	0.339487	PR1
IL1RAP	3:190616826:C:T	4.41974e-26	-1.1188	0.0893873	4.79964e-20	0.339073	NR2
FOLR3	11:72145571:C:T	4.94977e-23	1.49902	0.130959	4.34224e-17	0.338492	NR1
LRRN1	3:3765908:T:C	9.15773e-26	0.861583	0.0695147	2.12273e-19	0.338327	NR1
PLA2G2A	1:19979653:G:C	1.46056e-19	1.06576	0.104214	2.01944e-14	0.338274	NR1
LRRN1	3:3773480:G:A	2.43709e-23	0.844743	0.0729177	5.25713e-17	0.337861	PR1
LRIG1	3:66384219:T:C	7.61871e-22	-0.902434	0.0815981	5.38921e-16	0.337533	PR1
CD6	11:61008737:C:T	2.02709e-25	-0.840586	0.0682757	3.86493e-19	0.337013	PR1
FCRL6	1:159803847:A:G	2.59662e-17	-0.958897	0.101487	3.07386e-12	0.336228	PR2
LTA	6:31512356:C:T	8.33781e-21	-1.45262	0.136076	6.92064e-14	0.335841	NR2
XCL1	1:168544108:A:T	5.43099e-20	0.951802	0.0913538	3.04371e-14	0.333716	PR2
PILRA	7:100334426:C:T	1.43537e-35	0.8856	0.0559876	4.30398e-27	0.332577	NR2
GPC5	13:91764804:T:C	6.75348e-19	-0.860287	0.0859373	1.16862e-13	0.331055	PR1
IL1RAP	3:190611083:A:G	2.94214e-26	-1.1415	0.0908499	4.46609e-20	0.329928	NR1
UMOD	16:20350119:A:G	5.0153e-22	-0.979506	0.0882807	4.06929e-16	0.329828	NR1
PVR	19:44639551:G:T	1.34715e-19	-0.973192	0.0948367	5.55504e-14	0.327699	PR1
LGALS8	1:236596339:A:G	1.44068e-21	0.846631	0.0771031	4.78519e-16	0.327584	PR2
FOLR3	11:72159189:C:T	2.16719e-25	1.47263	0.119951	5.29118e-19	0.326679	NR2
IL6R	1:154455807:A:G	4.5865e-51	0.835432	0.0386277	4.9303e-41	0.325059	PR1
SPINK4	9:33236166:A:G	5.29038e-20	1.06981	0.1028	1.37724e-14	0.323213	PR1
ADAM15	1:155060832:G:A	1.35455e-21	0.905786	0.0824192	4.48525e-16	0.323144	PR2
ADGRB3	6:68968025:A:G	1.20228e-22	-0.865565	0.076317	3.45554e-16	0.322838	PR1
CCL24	7:75831075:A:G	1.06815e-18	-1.25311	0.126345	2.84291e-13	0.320562	NR1
SFTPD	10:79952684:C:T	1.64714e-16	-1.00729	0.110192	6.11293e-12	0.320193	PR1
TMPRSS5	11:113681890:C:G	2.57651e-17	0.842292	0.0892518	1.86302e-12	0.31735	PR1
LILRA2	19:54573515:A:G	5.71515e-33	-1.13576	0.0762955	2.24892e-26	0.317255	NR1
ADAM15	1:155060832:G:A	4.50754e-22	0.936426	0.0842748	2.83298e-16	0.316119	NR1
SNCG	10:86966227:A:G	7.08409e-36	0.944545	0.059396	9.05359e-28	0.31427	NR1
MIA	19:40757498:A:G	7.2097e-23	1.47253	0.128713	1.47363e-16	0.313831	PR2
MIA	19:40757498:A:G	6.22282e-22	1.47116	0.132651	3.55231e-16	0.313247	PR1
CCL24	7:75840133:T:C	1.01648e-17	-1.3067	0.136333	1.12935e-12	0.313049	PR1
SPINK4	9:33237767:T:G	1.31262e-21	0.969922	0.0885133	7.14338e-16	0.31242	NR2
KLB	4:39484214:C:T	1.87972e-14	-0.830121	0.0993343	8.51408e-10	0.31193	NR1
SNCG	10:86966227:A:G	3.62188e-30	0.939108	0.0674084	1.02344e-22	0.310662	NR2
DPEP1	16:89641595:T:A	1.81643e-22	0.807432	0.0717747	4.48859e-16	0.309377	NR1
CD109	6:73784654:C:T	3.07543e-28	0.802118	0.0605437	3.83809e-21	0.304565	NR1
PVR	19:44639551:G:T	1.62753e-20	-0.937471	0.0883912	7.1232e-15	0.304084	PR2
CLEC7A	12:10118488:A:C	1.61218e-30	-1.50882	0.107493	2.11398e-23	0.303419	NR1
CD200R1	3:112921689:G:A	1.4064e-23	1.58837	0.136375	1.57551e-17	0.302717	NR2
CNTN2	1:205054884:C:T	2.98611e-28	-1.07465	0.0808142	1.48992e-21	0.301642	PR1
VNN2	6:132751511:A:G	6.79109e-18	-0.798949	0.082918	9.33377e-13	0.301399	NR2
VNN2	6:132751511:A:G	1.19978e-17	-0.798911	0.0837463	1.94915e-12	0.301371	NR1
PVR	19:44644419:T:G	3.70376e-16	-0.900809	0.100145	3.60044e-11	0.301151	NR1
HNMT	2:138002079:C:T	2.82012e-33	-1.23601	0.0823276	4.79512e-26	0.299738	NR2
VSTM1	19:54062922:T:C	1.36868e-15	0.922391	0.104943	7.59458e-11	0.2997	NR2
FCRL6	1:159824724:G:A	4.37897e-17	-1.02021	0.109218	3.19654e-12	0.299671	NR2
VSTM1	19:54042277:T:C	3.90974e-15	-0.783235	0.0907749	1.46816e-10	0.299658	PR1
IL6R	1:154447611:G:A	1.51335e-51	0.801532	0.0365647	3.94716e-41	0.298324	PR2
IL17RB	3:53839787:A:G	3.01216e-19	0.805603	0.0795903	3.79804e-14	0.297736	NR2
ADAM15	1:155060832:G:A	4.56674e-22	0.907759	0.0816412	1.93541e-16	0.297061	NR2
FCRL6	1:159803847:A:G	1.13026e-17	-0.90125	0.0941959	7.64704e-13	0.297016	PR1
KLB	4:39458870:C:G	3.95647e-17	-0.839988	0.0895388	7.44335e-12	0.296933	PR2
LILRA2	19:54573515:A:G	3.59253e-31	-1.09814	0.0769008	2.04066e-24	0.296586	NR2
CLEC7A	12:10118488:A:C	7.91899e-28	-1.58355	0.120419	1.29281e-20	0.295298	PR1
HNMT	2:138002079:C:T	6.12864e-29	-1.22649	0.0909156	1.83433e-22	0.295138	NR1
VCAN	5:83536320:C:G	9.11789e-17	-0.767748	0.0832295	4.56429e-12	0.294339	NR2
TMPRSS5	11:113681890:C:G	1.67931e-21	0.814856	0.074679	4.66979e-16	0.293963	NR1
TMPRSS5	11:113673391:G:T	3.58807e-23	0.812751	0.0706417	2.11258e-17	0.293584	NR2
CLEC7A	12:10118488:A:C	6.4039e-25	-1.47796	0.122008	1.81806e-18	0.291134	NR2
TPSAB1	16:1245817:T:A	2.06623e-13	0.762925	0.095737	5.24453e-09	0.291027	PR1
CD200R1	3:112921689:G:A	1.65632e-17	1.55654	0.164038	1.9221e-12	0.290706	NR1
CNTN2	1:205054884:C:T	3.09004e-22	-1.06216	0.0950195	1.70279e-16	0.289708	NR2
SFTPD	10:79946568:A:G	1.21014e-19	-0.768065	0.0748373	2.99559e-14	0.285459	NR2
ICAM5	19:10296493:G:C	1.93857e-17	0.755661	0.0795852	2.3329e-12	0.284565	PR2
FCAR	19:54867770:C:T	1.92158e-18	0.881187	0.0896125	1.13744e-13	0.284091	NR2
SMPDL3A	6:122800327:A:G	7.70766e-19	-1.06528	0.10648	2.24194e-13	0.283947	PR2
CPVL	7:29120988:C:T	3.82133e-16	-0.896344	0.0996464	2.65999e-11	0.283013	NR2
SFTPA2	10:79558907:C:G	3.8111e-14	0.982985	0.119114	2.48995e-09	0.282771	PR1
CD276	15:73701156:A:G	3.1684e-23	-1.54812	0.134095	6.90404e-17	0.282232	PR1
XCL1	1:168544005:G:A	2.25315e-19	0.86311	0.0848941	2.93405e-14	0.282203	NR2
IL6R	1:154447611:G:A	3.04189e-42	0.774077	0.0425887	5.8677e-34	0.282193	NR1
LTA	6:31572980:A:C	5.23841e-17	-1.37416	0.147373	7.09504e-11	0.281609	PR1
SFTPD	10:79946568:A:G	6.13131e-18	-0.76148	0.0789498	1.00807e-12	0.280586	NR1
XCL1	1:168544005:G:A	8.63296e-18	0.859587	0.0896206	1.249e-12	0.279904	NR1
PVR	19:44644419:T:G	7.35467e-16	-0.866832	0.0975081	3.10811e-11	0.278862	NR2
CD276	15:73701848:C:T	8.94342e-20	-1.53708	0.148636	7.33153e-14	0.278221	PR2
VSTM1	19:54045772:T:C	9.71496e-15	-0.751719	0.0887993	3.66403e-10	0.276292	NR1
SMPDL3A	6:122800327:A:G	3.26277e-21	-1.04987	0.0968842	1.84319e-15	0.275791	PR1
CNTN2	1:205054884:C:T	3.39683e-22	-1.03416	0.0927118	1.45705e-16	0.274635	NR1
FCRL6	1:159824724:G:A	1.74317e-15	-0.973227	0.111285	9.55304e-11	0.272706	NR1
ENPP5	6:46115200:C:T	7.51693e-19	-0.834628	0.0836906	7.22357e-14	0.27245	NR1
LILRA2	19:54573515:A:G	6.15417e-23	-1.0428	0.0909578	3.66079e-17	0.272089	PR2
CD70	19:6591135:C:A	1.20152e-17	0.807512	0.0844841	7.21813e-13	0.271664	PR1
PILRA	7:100373690:T:C	3.03965e-40	0.861797	0.0491254	9.42906e-32	0.271581	PR1
GPC5	13:91764804:T:C	3.31431e-19	-0.823376	0.0814656	2.68928e-14	0.2715	NR2
CCL8	17:34322718:T:C	1.26935e-19	-1.00516	0.0977151	4.22407e-14	0.27115	PR2
CRNN	1:152419091:G:A	4.71859e-15	-1.15325	0.133987	2.9877e-10	0.271093	PR2
GP6	19:55025227:G:A	1.27313e-18	1.01102	0.102148	1.00402e-13	0.26974	NR2
TPSAB1	16:1245817:T:A	1.60692e-12	0.734172	0.096275	4.23249e-08	0.269504	PR2
FCAR	19:54878455:C:T	1.37727e-16	0.815485	0.088819	1.02432e-11	0.266655	PR2
GNLY	2:85705880:C:T	1.16172e-15	0.933445	0.105941	1.05021e-10	0.26513	NR1
GPC5	13:91764804:T:C	5.32081e-15	-0.76905	0.0895554	2.56703e-10	0.264559	PR2
CNTN2	1:205054884:C:T	1.53061e-25	-1.0022	0.0809548	4.22809e-19	0.262341	PR2
FCAR	19:54867770:C:T	4.18996e-17	0.84651	0.0906109	2.6776e-12	0.262171	NR1
CST5	20:23879541:A:G	2.38409e-13	0.739861	0.0931256	4.34909e-09	0.261085	PR1
CRNN	1:152419091:G:A	1.75982e-15	-1.00129	0.11445	6.47174e-11	0.261027	NR2
VCAN	5:83536320:C:G	2.19954e-17	-0.723784	0.0763897	1.90497e-12	0.260524	PR2
HNMT	2:138002079:C:T	1.2481e-32	-1.26719	0.0852274	1.17022e-25	0.260402	PR2
PAEP	9:135575920:A:C	4.9361e-14	1.06014	0.129004	1.5453e-09	0.260033	PR2
CCL16	17:35979070:A:G	1.25128e-23	-1.33561	0.114074	1.06732e-17	0.258182	PR2
SIGLEC9	19:51122980:A:G	5.2927e-17	-0.759116	0.0814264	5.08479e-12	0.257768	PR1
CST5	20:23879541:A:G	8.87381e-16	0.737477	0.0832884	8.66645e-11	0.257454	NR1
IL7R	5:35881274:G:T	2.46067e-16	-0.872327	0.096278	2.67128e-11	0.257194	NR1
CCL8	17:34322718:T:C	1.09691e-19	-0.978063	0.095016	1.14087e-14	0.256727	PR1
KLB	4:39458870:C:G	3.30417e-16	-0.780616	0.0864531	2.50967e-11	0.256441	PR1
VCAN	5:83536320:C:G	2.82449e-19	-0.717958	0.0707583	2.10116e-14	0.256347	PR1
SIGLEC5	19:51655063:G:T	3.67273e-14	-1.15364	0.139542	1.59508e-09	0.255025	PR2
TYRO3	15:41563538:T:G	1.68377e-19	0.808322	0.0789178	1.02251e-13	0.254156	PR2
PILRA	7:100373690:T:C	9.51974e-38	0.833279	0.0499088	3.0918e-29	0.253904	PR2
SFTPA2	10:79558907:C:G	1.41e-11	0.931339	0.128535	3.66473e-07	0.253838	PR2
ULBP2	6:149975762:C:A	2.23234e-19	-0.879209	0.0862093	7.33108e-14	0.253604	PR2
WFIKKN2	17:50838518:G:A	3.02614e-25	-0.767942	0.0628703	3.01104e-19	0.253543	NR1
IL6R	1:154447611:G:A	5.08599e-46	0.73335	0.0374085	1.86993e-36	0.25328	NR2
KLK10	19:51019035:G:C	3.13368e-16	0.720156	0.0798239	1.13674e-11	0.253175	NR1
SIGLEC9	19:51125272:A:G	7.7203e-14	-0.716576	0.0882205	2.19938e-09	0.253169	NR1
CD109	6:73784654:C:T	8.77379e-26	0.731177	0.0589036	3.37519e-19	0.253074	NR2
IL1RL1	2:102309902:G:A	2.14803e-15	-0.731249	0.0837035	2.2629e-10	0.251855	PR2
CST5	20:23879541:A:G	2.15745e-17	0.728826	0.0770984	1.69623e-12	0.25145	NR2
HNMT	2:138002079:C:T	1.57574e-29	-1.24448	0.0905538	1.13341e-22	0.251152	PR1
CRNN	1:152419091:G:A	1.68224e-14	-0.980825	0.117112	4.82126e-10	0.250466	NR1
GP6	19:55025227:G:A	1.05039e-18	0.973586	0.0981365	1.54719e-13	0.250135	NR1
CCL25	19:8056476:A:G	6.21043e-19	0.888357	0.088814	1.06824e-13	0.250098	NR1
MGMT	10:129645726:A:G	1.42045e-15	-0.707475	0.0804548	1.05279e-10	0.24943	PR1
ICAM5	19:10296493:G:C	9.78024e-17	0.70667	0.0766062	7.12868e-12	0.248863	PR1
SIGLEC5	19:51655063:G:T	3.8749e-16	-1.13849	0.126447	2.07967e-11	0.248371	PR1
CA6	1:8974539:A:G	6.01337e-18	0.71705	0.0741714	7.21813e-13	0.247947	PR1
CTSC	11:88390564:T:A	3.47424e-13	0.764567	0.0971507	1.05218e-08	0.247884	NR1
GLRX	5:95827733:A:G	1.75692e-22	1.06199	0.0939491	2.04204e-16	0.247817	PR2
PAEP	9:135575920:A:C	1.46231e-14	1.03459	0.122999	5.25371e-10	0.24765	PR1
CST5	20:23879541:A:G	7.10983e-14	0.718996	0.0881478	2.33455e-09	0.246567	PR2
LILRB2	19:54279064:C:T	2.81616e-20	-1.24332	0.118636	3.91273e-15	0.246034	NR1
GLRX	5:95827733:A:G	1.21947e-23	1.05752	0.0904622	1.11674e-17	0.245735	PR1
CA6	1:8974539:A:G	2.72324e-19	0.713555	0.0701802	7.61753e-14	0.245536	PR2
FCGR2B	1:161509955:A:G	3.71157e-14	-0.720805	0.0873862	1.21816e-09	0.245324	NR2
CCL25	19:8056476:A:G	2.07432e-23	0.879262	0.0758752	1.11588e-17	0.245004	NR2
NUCB2	11:17269663:T:C	1.5261e-23	-0.729144	0.0627261	1.17842e-17	0.244678	NR1
PLA2G2A	1:19979653:G:C	7.22077e-18	0.905204	0.0940398	9.00506e-13	0.244029	NR2
CLEC4C	12:7760079:A:G	4.56359e-15	0.703719	0.0817993	8.63662e-11	0.242662	PR1
CRNN	1:152419091:G:A	6.85352e-16	-1.08988	0.122299	3.26314e-11	0.242119	PR1
SIRPB1	20:1535724:C:A	1.13779e-24	-1.099	0.0914646	5.82858e-19	0.241783	NR1
CES1	16:55810160:C:T	1.49939e-29	-1.32458	0.09656	1.65323e-22	0.241525	NR2
VMO1	17:4780800:G:A	8.80412e-14	0.698555	0.0861927	3.06876e-09	0.24116	NR2
LAIR2	19:54510332:T:G	4.23993e-13	-0.954182	0.121481	1.15354e-08	0.241086	PR2
LRP11	6:149820395:A:C	3.4695e-19	0.709516	0.0701479	9.90421e-14	0.240667	PR1
APOH	17:66214462:A:C	1.12085e-14	-1.65291	0.195798	2.98585e-10	0.240555	NR1
MIA	19:40762338:A:G	4.23944e-15	1.53522	0.178494	1.51435e-10	0.240153	NR1
ENPP5	6:46115200:C:T	2.15946e-16	-0.7834	0.0862131	8.58147e-12	0.240031	NR2
SERPINA11	14:94446462:G:A	3.08794e-20	-0.723435	0.068964	7.59643e-15	0.239981	PR1
FOLR3	11:72169574:C:G	1.03924e-20	1.42623	0.133816	4.02345e-15	0.239539	PR1
VMO1	17:4783119:A:C	9.45029e-13	0.691533	0.0898118	1.54768e-08	0.238883	NR1
CTSC	11:88371133:T:C	1.46314e-14	1.02423	0.121897	6.89047e-10	0.238487	NR2
CTSC	11:88291841:C:T	1.86673e-15	1.11405	0.127188	1.53486e-10	0.237822	PR2
NUCB2	11:17269952:G:T	2.26989e-22	-0.708509	0.0628969	2.16913e-16	0.237673	PR2
IL7R	5:35862739:C:T	5.62495e-17	-0.842965	0.0905147	7.27825e-12	0.237451	PR1
CD109	6:73774414:A:G	4.97417e-23	0.699799	0.0608664	1.01452e-16	0.236637	PR2
CST7	20:24991697:C:T	9.81815e-15	-0.80617	0.0950993	2.2615e-10	0.23588	PR1
PLA2G2A	1:19979653:G:C	1.50319e-17	0.855489	0.0898368	1.8283e-12	0.235572	PR1
VSTM1	19:54042277:T:C	3.84242e-12	-0.694392	0.0929032	7.73159e-08	0.235532	PR2
IL7R	5:35857602:A:G	5.5992e-17	-0.838006	0.0900884	7.80558e-12	0.235295	NR2
OSCAR	19:54051696:C:T	3.17664e-16	0.693203	0.0767183	1.58245e-11	0.235102	PR1
SIGLEC9	19:51125272:A:G	7.5421e-15	-0.727135	0.0852449	3.79138e-10	0.234681	PR2
CD276	15:73711192:G:A	5.02182e-18	-1.63145	0.168601	1.01665e-12	0.234349	NR1
TYRO3	15:41588421:A:G	6.84334e-17	-0.737141	0.0794184	6.31123e-12	0.234146	PR1
CCL15	17:36025195:T:G	1.12921e-18	1.58918	0.16037	1.3756e-13	0.234085	NR1
CCL16	17:35979070:A:G	2.52365e-25	-1.27026	0.103454	2.94815e-19	0.233535	PR1
TACSTD2	1:58575905:A:G	2.43728e-15	-0.737956	0.0849102	8.7357e-11	0.233077	NR1
WFIKKN2	17:50834628:G:A	1.09642e-21	-0.731345	0.0665743	3.67173e-16	0.232971	NR2
LAIR2	19:54514267:C:T	2.49724e-12	-1.02056	0.13548	2.5611e-08	0.232823	NR1
LRP11	6:149829332:A:G	3.82187e-19	0.69728	0.068939	1.87148e-13	0.232438	PR2
NAAA	4:75937118:T:A	5.30409e-14	0.809086	0.0987006	2.05259e-09	0.232125	PR1
LRP11	6:149622577:C:A	8.42801e-23	0.687403	0.060427	1.02388e-16	0.23139	NR2
LILRB2	19:54279064:C:T	5.85647e-21	-1.20573	0.112378	1.43631e-15	0.231382	NR2
IL17RB	3:53842191:A:G	1.56999e-19	-0.717382	0.0699646	7.15657e-14	0.231072	PR2
CPPED1	16:12788237:C:A	2.00255e-27	1.06336	0.0820006	6.51157e-21	0.230831	NR1
CD70	19:6591135:C:A	1.76788e-17	0.74373	0.0782078	1.3271e-12	0.230444	PR2
SIGLEC5	19:51627384:T:A	9.71631e-15	-1.17185	0.138429	3.59309e-10	0.230118	NR1
ULBP2	6:149975762:C:A	3.43193e-19	-0.83643	0.0826817	7.06901e-14	0.229526	PR1
APOH	17:66214462:A:C	6.12964e-18	-1.61363	0.167189	1.05858e-12	0.229258	NR2
CLEC4C	12:7747588:C:T	5.83564e-12	0.68763	0.0931032	4.52654e-08	0.22836	NR1
CHGB	20:5917131:A:C	2.85914e-21	-0.688292	0.0635016	6.63252e-16	0.226906	NR2
IL17RB	3:53842191:A:G	2.05437e-18	-0.710455	0.0722269	2.58559e-13	0.226631	PR1
APOH	17:66214462:A:C	1.23183e-14	-1.41426	0.16739	9.44519e-10	0.226352	PR2
NAAA	4:75919627:C:T	1.48909e-12	-0.735133	0.0964499	3.55987e-08	0.225861	NR1
IL1RL1	2:102309902:G:A	1.71139e-14	-0.692225	0.0825513	1.001e-09	0.225691	PR1
CD40	20:46118343:T:C	3.49196e-23	0.720094	0.0624532	2.5998e-17	0.225432	PR1
CPPED1	16:12811067:T:C	8.61501e-25	0.898417	0.0741477	4.45199e-18	0.225147	PR2
LILRA2	19:54573515:A:G	7.71479e-19	-0.947292	0.0948255	1.10309e-13	0.224531	PR1
COMT	22:19961490:C:T	1.65091e-19	-0.671167	0.0655075	4.24829e-14	0.224343	PR2
SIGLEC9	19:51125272:A:G	6.15649e-14	-0.674295	0.0825906	1.43366e-09	0.224174	NR2
CPVL	7:29131839:T:C	1.3178e-12	0.70137	0.0915623	4.06188e-08	0.22328	PR2
VCAN	5:83536320:C:G	2.15051e-14	-0.668315	0.0801852	7.11299e-10	0.223035	NR1
CCL18	17:36062001:G:A	6.30766e-23	-0.840571	0.0734761	2.43833e-17	0.222973	PR1
CPVL	7:29120988:C:T	1.16705e-13	-0.794939	0.0987073	4.10768e-09	0.2226	NR1
S100A4	1:153547505:C:G	1.04982e-16	1.23298	0.133991	6.53542e-12	0.222469	NR2
IL1RL1	2:102315366:C:G	1.9333e-15	-0.681902	0.0781226	1.21489e-10	0.22171	NR1
CD109	6:73784654:C:T	1.17756e-17	0.680543	0.0711765	1.23616e-12	0.221413	PR1
LTA	6:31512356:C:T	1.17767e-13	-1.17913	0.146439	2.72471e-08	0.221286	NR1
TYRO3	15:41588421:A:G	2.66831e-17	-0.701332	0.0745018	5.11027e-12	0.221072	NR1
CPVL	7:29125667:A:T	2.23244e-13	0.703799	0.0884627	1.0043e-08	0.220721	PR1
TACSTD2	1:58575047:T:C	4.69896e-17	-0.885192	0.0948771	3.84513e-12	0.220326	NR2
CRHBP	5:76871865:T:C	1.31511e-14	-0.674757	0.0801372	4.99433e-10	0.220315	NR2
SPINK5	5:148129088:T:C	2.83261e-17	0.668515	0.0708578	3.07386e-12	0.219928	PR2
COMT	22:19963748:G:A	6.24468e-22	-0.663621	0.0598399	3.81403e-16	0.219593	PR1
ARSB	5:78991756:T:G	5.27782e-12	-0.684622	0.0924385	5.90103e-08	0.219556	NR2
CD40	20:46119308:T:G	2.28778e-21	0.727824	0.0669383	8.55566e-16	0.219163	NR2
TPSAB1	16:1245817:T:A	2.73031e-15	0.665858	0.0767773	1.71058e-10	0.218862	NR1
GPR37	7:124456673:C:A	4.94217e-14	-0.772806	0.0942811	2.00146e-09	0.218505	NR1
IL1R2	2:101993894:C:T	7.46845e-16	-0.688023	0.077234	8.46527e-11	0.217769	PR2
PM20D1	1:205845357:G:A	2.13882e-09	-0.737109	0.116727	1.36127e-05	0.217589	NR1
LILRB2	19:54288225:G:T	3.4378e-20	-1.35764	0.129627	5.20289e-15	0.217053	PR1
CD276	15:73711192:G:A	1.07482e-16	-1.56849	0.17052	1.13311e-11	0.21661	NR2
SIGLEC5	19:51655063:G:T	2.34279e-16	-1.06115	0.116948	1.24933e-11	0.216412	NR2
ENTPD5	14:73948850:G:A	5.62643e-10	-1.01023	0.153613	5.21959e-06	0.216193	PR2
KLK10	19:51013935:T:C	1.49101e-15	0.659356	0.0750499	4.4769e-11	0.216034	PR1
PM20D1	1:205845357:G:A	2.26725e-09	-0.734396	0.116466	1.275e-05	0.21599	NR2
MIA	19:40762338:A:G	5.12257e-17	1.4558	0.156266	5.46636e-12	0.215949	NR2
TACSTD2	1:58575905:A:G	2.67974e-15	-0.693161	0.0797648	1.06251e-10	0.214099	PR1
FCRL2	1:157766308:A:G	3.01064e-12	0.821686	0.109503	4.19364e-08	0.213967	NR2
SIRPB1	20:1566159:G:A	1.99412e-16	-0.994897	0.109203	1.19742e-11	0.213601	PR1
KLK10	19:51017231:A:C	1.49334e-17	0.656208	0.0688102	1.67315e-12	0.213392	PR2
ICAM5	19:10291455:T:C	1.38337e-16	0.652882	0.0713339	6.70865e-12	0.212926	NR1
CCL25	19:8056476:A:G	4.09877e-14	0.757484	0.0919234	9.07975e-10	0.212897	PR1
UMOD	16:20381010:G:A	1.00424e-15	-0.917319	0.103533	6.70693e-11	0.210547	PR2
IL2RA	10:5995763:C:T	2.53993e-16	0.937883	0.103259	4.12853e-11	0.210219	PR2
OBP2B	9:133210436:G:A	3.40972e-15	0.754877	0.087406	1.24298e-10	0.20999	NR1
CPPED1	16:12803538:C:A	3.90473e-27	0.896313	0.0694325	2.13591e-20	0.209834	PR1
CD70	19:6589097:T:G	8.36892e-15	0.677243	0.0797711	4.1016e-10	0.209734	NR1
KIR3DL1	19:54863102:G:A	6.67052e-11	-0.668525	0.0960917	6.59163e-07	0.209353	NR2
PXN	12:120196486:T:C	2.11711e-15	0.808724	0.0926533	1.93962e-10	0.208468	PR1
LEFTY2	1:225886863:T:G	1.72699e-16	-0.692241	0.0757903	1.91198e-11	0.207417	PR1
CLEC10A	17:7097808:T:A	2.77455e-13	0.867142	0.109394	7.09218e-09	0.207116	PR2
LRP11	6:149622577:C:A	4.44772e-21	0.650215	0.060413	1.62127e-15	0.207031	NR1
SFTPA2	10:79610769:C:A	3.81274e-12	0.815273	0.10929	6.17735e-08	0.206481	NR1
TYRO3	15:41590185:A:C	4.24471e-15	-0.642501	0.0746624	3.364e-10	0.206317	NR2
CD40	20:46119308:T:G	7.69791e-22	0.705429	0.0639543	3.52017e-16	0.205884	NR1
CDH6	5:31113307:C:G	6.49169e-13	0.926821	0.119214	1.64061e-08	0.205289	PR1
IL7R	5:35862739:C:T	3.34114e-14	-0.783719	0.0946168	1.85372e-09	0.205246	PR2
LAIR2	19:54510332:T:G	8.26949e-12	-0.879955	0.119986	1.40659e-07	0.205036	PR1
OBP2B	9:133210436:G:A	9.83791e-17	0.756965	0.0819629	1.34319e-11	0.204792	PR2
PXN	12:120151048:A:G	1.58733e-14	0.792727	0.0942951	8.14556e-10	0.204229	PR2
FCGR2B	1:161509069:T:C	5.75169e-11	-0.661195	0.0945305	7.26581e-07	0.204203	PR2
ENPP5	6:46129832:G:A	1.15753e-15	-0.773975	0.0876858	4.60296e-11	0.203754	PR1
BLMH	17:30307283:C:T	5.71734e-14	0.702364	0.0858128	1.34792e-09	0.203386	PR1
BLMH	17:30259885:T:G	1.03049e-15	0.698594	0.078884	5.29315e-11	0.203322	PR2
CST7	20:24919654:G:T	1.12701e-13	0.747872	0.0925673	4.62408e-09	0.202998	PR2
CD70	19:6589097:T:G	2.82084e-12	0.665856	0.088603	3.5486e-08	0.202741	NR2
FAM3B	21:41339352:C:T	1.1106e-12	-0.876492	0.114192	2.22669e-08	0.202732	NR2
GNLY	2:85705880:C:T	2.35196e-15	0.816128	0.0937906	1.28945e-10	0.202674	NR2
CDH6	5:31123036:A:G	4.19327e-13	0.942937	0.120021	1.64861e-08	0.202291	PR2
ICAM5	19:10291455:T:C	2.86479e-14	0.635858	0.0766885	6.89047e-10	0.201966	NR2
CTSC	11:88291841:C:T	6.70564e-15	1.02593	0.120134	3.45434e-10	0.201687	PR1
LEFTY2	1:225886863:T:G	2.52648e-20	-0.681122	0.0646365	1.58029e-14	0.200807	PR2
BLMH	17:30313974:G:C	5.08485e-19	0.725638	0.0722708	7.04781e-14	0.200788	NR2
CES1	16:55810160:C:T	1.76909e-26	-1.20758	0.0955284	3.6884e-20	0.200742	NR1
VNN2	6:132734473:G:C	6.98094e-12	-0.648788	0.0881082	8.75962e-08	0.200286	PR1
BTN3A2	6:26365451:T:G	2.74251e-14	-1.29181	0.155664	1.16338e-09	0.200231	NR2
VNN2	6:132732448:G:A	7.46828e-12	-0.639918	0.0869695	1.19658e-07	0.200027	PR2
PM20D1	1:205843784:A:G	1.47442e-11	-0.831385	0.114961	1.11967e-07	0.199937	PR1
KLB	4:39485349:T:A	2.89713e-11	-0.667264	0.0938964	4.09481e-07	0.199384	NR2
EDAR	2:108982800:G:A	3.18576e-11	-0.935006	0.131679	3.96481e-07	0.198902	PR2
KLRD1	12:10327268:C:T	3.39817e-11	-0.668833	0.094495	3.57514e-07	0.198817	NR2
SCARF1	17:1638896:G:A	8.10602e-24	-0.656394	0.0557463	1.03534e-17	0.197563	PR2
CCL15	17:36025195:T:G	2.02391e-19	1.45882	0.143253	2.40637e-14	0.197256	NR2
TACSTD2	1:58525165:A:G	3.02233e-12	0.666536	0.0886799	7.4309e-08	0.196409	PR2
SIRPB1	20:1535724:C:A	2.38702e-19	-0.99035	0.097495	5.03833e-14	0.19634	NR2
CHGB	20:5917132:G:C	9.50995e-16	-0.646284	0.0729559	3.88458e-11	0.196196	PR1
CLEC4D	12:8540247:C:T	2.74006e-13	0.631899	0.0798487	4.86349e-09	0.196099	NR2
CNTNAP2	7:145636777:G:A	2.02893e-11	-0.732022	0.101936	2.81564e-07	0.195947	PR2
CPPED1	16:12793881:G:A	8.98083e-26	0.979715	0.0789482	3.32526e-19	0.195945	NR2
FCGR2B	1:161499264:G:C	4.89571e-10	-0.645707	0.0978671	3.0379e-06	0.194748	PR1
WFIKKN2	17:50838798:G:A	3.71214e-18	-0.664947	0.0682455	5.12237e-13	0.19468	PR1
APOH	17:66214462:A:C	1.82782e-16	-1.31015	0.143586	1.11839e-11	0.194253	PR1
SLAMF7	1:160740367:G:A	2.60267e-12	-0.690898	0.0918043	3.19313e-08	0.193321	NR1
ENPP5	6:46129832:G:A	1.53644e-14	-0.752943	0.0895052	6.6558e-10	0.192831	PR2
MMP12	11:102875061:T:C	9.31671e-12	-0.871599	0.119285	1.38219e-07	0.192354	NR2
MATN3	2:20020375:T:G	3.76766e-12	0.631485	0.084522	7.13862e-08	0.191904	PR1
FCRLB	1:161718641:T:C	2.30888e-09	1.02289	0.162204	1.38907e-05	0.191831	PR1
FAM3B	21:41339786:C:T	7.02337e-11	-1.01091	0.145278	1.47641e-06	0.191608	PR2
OBP2B	9:133210436:G:A	6.74247e-15	0.72027	0.0844423	2.78014e-10	0.191178	NR2
NUCB2	11:17269663:T:C	4.87711e-19	-0.644099	0.0641083	8.19375e-14	0.19093	NR2
TNFRSF13C	22:41930162:T:C	8.71812e-12	-1.19557	0.163429	1.41212e-07	0.19051	NR1
CCL8	17:34322718:T:C	5.09128e-17	-0.867258	0.0930819	4.785e-12	0.190442	NR2
KLK10	19:51006822:T:C	1.89261e-11	0.626189	0.0871891	2.55562e-07	0.190442	NR2
UMOD	16:20344489:A:G	1.0244e-12	-0.938739	0.121972	1.64061e-08	0.190168	PR1
SIRPB1	20:1535534:A:G	3.38574e-15	-0.698932	0.0806925	1.86846e-10	0.190021	PR2
VWC2	7:49775794:C:G	2.21096e-16	-0.618191	0.0680602	1.27886e-11	0.189794	NR2
CTRB1	16:75221319:A:G	1.46563e-12	0.719722	0.0941837	5.90059e-08	0.189417	PR2
IL2RA	10:5995763:C:T	1.74048e-14	0.889847	0.106154	1.02309e-09	0.189236	PR1
TPSAB1	16:1245817:T:A	6.28036e-13	0.618964	0.0796304	1.40404e-08	0.18912	NR2
PLA2G2A	1:19979653:G:C	6.6921e-14	0.76581	0.0937703	3.5369e-09	0.188771	PR2
FCAR	19:54886824:T:C	3.77251e-15	-0.66485	0.0770022	1.13835e-10	0.188728	PR1
CD300C	17:74530959:C:G	9.27239e-17	0.943345	0.102295	6.75461e-12	0.18864	NR2
CCL8	17:34322718:T:C	2.09082e-16	-0.863076	0.0949839	1.03505e-11	0.18861	NR1
CTRB1	16:75221319:A:G	4.19122e-13	0.717858	0.0914579	1.13321e-08	0.188437	PR1
CCL18	17:36064257:A:G	1.15966e-20	0.818498	0.0770391	3.25418e-15	0.188376	NR2
GPR37	7:124456673:C:A	1.82381e-14	-0.716105	0.0855959	6.81577e-10	0.187618	NR2
CD40	20:46118343:T:C	8.2348e-23	0.655873	0.0574316	7.83254e-17	0.187015	PR2
IL1RL1	2:102315366:C:G	6.13986e-13	-0.624738	0.0803333	1.41663e-08	0.186096	NR2
WFDC12	20:45137426:G:T	1.56614e-14	-0.612068	0.0729413	4.19064e-10	0.18589	NR2
CHGB	20:5917131:A:C	8.48529e-18	-0.622909	0.0649262	7.99415e-13	0.185844	NR1
PPCDC	15:75043832:T:A	2.41992e-19	1.00338	0.0987986	7.57354e-14	0.185336	NR2
CLEC10A	17:7097808:T:A	1.96474e-12	0.820144	0.108139	2.96672e-08	0.185274	PR1
CD300C	17:74530959:C:G	7.95271e-17	0.932461	0.100909	7.69146e-12	0.184312	NR1
MATN3	2:20007858:G:A	1.08004e-12	-0.610087	0.0792904	3.08564e-08	0.183165	PR2
CCL25	19:8056476:A:G	4.86166e-12	0.702068	0.0944496	7.8486e-08	0.182886	PR2
WFIKKN2	17:50838798:G:A	9.13823e-16	-0.644143	0.0725753	6.76184e-11	0.182688	PR2
CLEC4D	12:8535216:A:G	3.28309e-13	0.6115	0.0776066	4.09629e-09	0.182541	NR1
CLEC10A	17:7083333:C:T	4.54809e-12	0.762423	0.102584	6.37869e-08	0.182405	NR2
LAIR2	19:54514267:C:T	5.09227e-10	-0.902297	0.137002	3.86859e-06	0.18199	NR2
CA5A	16:87882686:G:C	3.90135e-15	0.699768	0.0812313	3.71996e-10	0.18173	NR1
CST7	20:24991697:C:T	1.48938e-12	-0.760152	0.0996893	2.32381e-08	0.18132	NR2
COMT	22:19962712:C:T	8.65369e-21	-0.60188	0.056456	2.21197e-15	0.181111	NR1
PPCDC	15:75043832:T:A	8.45869e-17	0.991525	0.107415	8.48751e-12	0.180982	NR1
ASAH2	10:50246241:G:T	2.90982e-11	0.623271	0.0877153	2.40905e-07	0.180421	NR2
SCG3	15:51424510:G:A	9.83742e-16	-0.680445	0.0769919	6.10783e-11	0.179973	NR1
MMP12	11:102848803:C:T	1.076e-12	-0.847598	0.110251	2.69297e-08	0.179758	PR1
SCARF1	17:1638896:G:A	4.01239e-19	-0.631851	0.0627444	5.99644e-14	0.179438	NR1
CA6	1:8974539:A:G	2.55132e-14	0.604583	0.0727481	6.79652e-10	0.178992	NR2
VMO1	17:4786743:C:A	6.35636e-11	0.598816	0.0858999	6.70977e-07	0.178696	PR1
WFDC12	20:45121769:T:C	7.21165e-14	-0.602944	0.074127	1.58812e-09	0.178539	NR1
MGMT	10:129646763:G:A	1.44576e-11	-0.602407	0.0831898	2.23208e-07	0.178339	PR2
CA6	1:8974539:A:G	9.36378e-14	0.603478	0.0745925	2.24875e-09	0.178338	NR1
NAAA	4:76067417:A:G	4.99242e-10	-0.710827	0.10787	3.61834e-06	0.177986	NR2
FAM3B	21:41349694:G:A	8.16986e-12	-1.20623	0.164427	2.0751e-07	0.17798	PR1
THBS2	6:169224606:C:A	1.22194e-12	0.971527	0.1269	3.01082e-08	0.17759	NR1
KIR3DL1	19:54863102:G:A	4.34198e-11	-0.614262	0.087358	5.50317e-07	0.176746	NR1
PM20D1	1:205845357:G:A	2.14363e-09	-0.704877	0.111454	1.28197e-05	0.176181	PR2
FGF5	4:80243569:C:T	2.29595e-13	0.710243	0.0893259	5.38445e-09	0.175998	PR1
ULBP2	6:149977706:C:T	3.89781e-14	-0.744786	0.0903827	1.64134e-09	0.175792	NR2
MGMT	10:129646763:G:A	1.51442e-12	-0.598117	0.0785031	2.48713e-08	0.175443	NR1
GLRX	5:95827733:A:G	2.4828e-18	0.857079	0.0875767	4.05811e-13	0.175258	NR1
GNLY	2:85705880:C:T	3.50314e-12	0.717332	0.0957657	5.24283e-08	0.175022	PR2
CLEC4C	12:7747588:C:T	3.38081e-10	0.601621	0.0903106	1.53497e-06	0.174806	NR2
FCRL2	1:157766308:A:G	5.84175e-12	0.742653	0.100556	6.42963e-08	0.174787	NR1
HSPB1	7:76294901:G:T	3.11782e-10	-0.681168	0.101879	2.85601e-06	0.174602	PR2
CDH6	5:30830490:G:A	1.25456e-10	0.59892	0.0875545	1.20108e-06	0.174523	NR1
MMP12	11:102851883:G:A	2.46328e-11	-0.829518	0.116302	3.06828e-07	0.174228	NR1
FGF5	4:80263187:A:T	2.99234e-12	0.69758	0.0929507	3.659e-08	0.174101	NR2
TFRC	3:196066034:A:C	1.14109e-13	-0.597184	0.0741174	4.39776e-09	0.173512	NR1
ENTPD5	14:73948850:G:A	4.98515e-08	-0.903282	0.158375	0.000147956	0.172841	PR1
SERPINA11	14:94446806:G:A	3.86692e-17	-0.611897	0.0652	3.95785e-12	0.172794	PR2
GLRX	5:95827733:A:G	1.0035e-18	0.848044	0.0853616	1.36813e-13	0.171582	NR2
FCRLB	1:161718641:T:C	1.24311e-08	0.967103	0.161616	6.42108e-05	0.171477	PR2
CLEC4D	12:8545495:G:T	1.64434e-14	0.587527	0.0699351	4.66198e-10	0.171061	PR2
CLEC4C	12:7760079:A:G	1.6747e-11	0.590483	0.0818378	2.18815e-07	0.170851	PR2
CCL18	17:36062001:G:A	2.33827e-15	-0.735215	0.0842914	1.07274e-10	0.170581	PR2
VWC2	7:49778721:T:G	7.02232e-19	-0.585597	0.0586573	1.17045e-13	0.170159	NR1
NUCB2	11:17269952:G:T	1.49452e-17	-0.598552	0.0628493	1.09356e-12	0.169626	PR1
TNFRSF10A	8:23225458:G:T	6.5129e-14	-0.584411	0.0716636	1.82796e-09	0.16947	NR2
ASAH2	10:50246241:G:T	3.19882e-08	0.62976	0.108714	7.70812e-05	0.169332	PR1
KLRD1	12:10318718:C:G	2.19973e-11	-0.611229	0.0854564	2.85219e-07	0.169115	NR1
SCG3	15:51424510:G:A	2.51261e-16	-0.659423	0.0727638	1.78256e-11	0.169024	NR2
PDCD1LG2	9:5515990:G:C	1.84679e-10	0.593033	0.087501	1.75586e-06	0.168513	PR1
KIR3DL1	19:54861907:T:G	1.74189e-08	-0.602272	0.10184	8.60621e-05	0.167923	PR1
OSCAR	19:54073506:G:A	8.7533e-14	0.58056	0.0714819	4.28914e-09	0.167744	PR2
CES1	16:55816819:G:A	2.28203e-16	-1.216	0.13379	2.07967e-11	0.167337	PR1
SERPINA12	14:94527267:C:T	6.1844e-11	0.662224	0.0949285	8.5775e-07	0.167285	PR1
SCG3	15:51674514:A:G	3.16326e-15	0.691047	0.0797702	1.80409e-10	0.166613	PR1
GNLY	2:85707529:T:C	1.05456e-11	0.695781	0.0954293	1.59421e-07	0.16609	PR1
MMP12	11:102851883:G:A	7.74429e-12	-0.83325	0.113343	2.18676e-07	0.16593	PR2
ENTPD5	14:74007693:T:C	6.83338e-09	-1.15442	0.18944	2.89003e-05	0.165845	NR2
FGF5	4:80263187:A:T	6.97697e-12	0.680205	0.0924881	8.63946e-08	0.165536	NR1
SPARCL1	4:87510396:A:C	8.3137e-35	0.588164	0.0376047	3.72832e-26	0.164605	PR2
KLRD1	12:10318451:A:G	2.18493e-12	-0.582193	0.0769505	3.31301e-08	0.164104	PR1
FUT3_FUT5	19:5841345:G:T	5.35687e-08	-1.28467	0.225822	0.000203866	0.163766	PR1
LY9	1:160789262:A:G	1.94912e-14	0.684476	0.0819647	5.52312e-10	0.163722	NR1
CA5A	16:87893616:T:C	1.011e-15	0.713924	0.0805867	1.66989e-10	0.162459	PR2
MGMT	10:129505249:A:G	2.04166e-12	0.593841	0.0784373	2.42095e-08	0.162296	NR2
IDUA	4:989272:T:C	1.69746e-08	0.611984	0.103451	8.03203e-05	0.161733	NR2
EDAR	2:108957694:C:T	5.10108e-10	1.05517	0.160114	2.59586e-06	0.161143	PR1
ADAM22	7:87762445:A:G	2.12716e-14	-0.568896	0.0682072	6.05421e-10	0.160591	NR2
SCARF1	17:1631849:T:G	2.24975e-18	0.622119	0.0633382	3.9306e-13	0.16041	PR1
MATN3	2:20020375:T:G	6.65001e-11	0.58199	0.0836468	6.19927e-07	0.160337	NR2
LEFTY2	1:225886863:T:G	4.65001e-14	-0.602502	0.0734135	1.37509e-09	0.160077	NR1
MATN3	2:20020375:T:G	4.63435e-10	0.581146	0.088036	3.29588e-06	0.159872	NR1
IL10RB	21:33291734:C:T	3.48039e-17	0.565291	0.0603194	3.72299e-12	0.15971	NR1
CHGB	20:5917131:A:C	1.03633e-13	-0.577144	0.0713109	2.1378e-09	0.159604	PR2
CXCL1	4:73880088:C:T	9.74568e-14	0.626389	0.0773747	1.49274e-09	0.158237	PR1
SERPINA12	14:94521214:T:A	5.99786e-10	0.637574	0.0971235	7.92889e-06	0.158122	PR2
MFGE8	15:88912537:C:G	2.36165e-11	0.6221	0.0869568	3.52633e-07	0.157838	PR2
HPGDS	4:94357519:C:T	2.01395e-08	0.593839	0.100905	7.97201e-05	0.157743	PR1
BTN3A2	6:26353872:G:T	3.17733e-13	-1.04311	0.132105	1.30661e-08	0.157481	PR1
TEK	9:27201553:T:G	4.20218e-10	1.09358	0.164925	5.36596e-06	0.157107	PR2
OGN	9:92258632:A:G	1.50861e-25	0.583555	0.0472271	7.57847e-19	0.156658	PR1
SPON1	11:14055495:A:T	2.87351e-17	0.561775	0.0596369	3.4054e-12	0.156394	PR1
BTN3A2	6:26353872:G:T	5.71797e-11	-1.16354	0.166642	8.00282e-07	0.156371	NR1
CDSN	6:31108206:A:G	1.88463e-11	0.675037	0.0938294	2.09302e-06	0.156334	PR2
SERPINA12	14:94527267:C:T	3.15593e-10	0.636139	0.0953434	2.95254e-06	0.156314	NR1
MFGE8	15:88910557:G:A	6.31772e-13	0.637959	0.0820094	1.31527e-08	0.156282	PR1
NFASC	1:204976188:T:C	7.74458e-12	0.884105	0.120261	1.23157e-07	0.156163	PR2
CDSN	6:31118600:C:G	5.02135e-10	0.560042	0.0850303	1.42079e-05	0.155896	NR1
FOLR3	11:72169574:C:G	9.25978e-19	1.15023	0.115303	4.70872e-13	0.1558	PR2
ULBP2	6:149975762:C:A	1.56254e-13	-0.703277	0.0878595	4.6928e-09	0.155202	NR1
LILRB2	19:54288225:G:T	3.40833e-15	-1.14706	0.132447	2.63438e-10	0.154942	PR2
ADAM22	7:87935182:C:G	1.14915e-13	-0.558461	0.0693216	2.29259e-09	0.154889	NR1
SLAMF7	1:160740367:G:A	2.58705e-10	-0.617995	0.0920883	1.43197e-06	0.154675	NR2
IL12RB1	19:18103711:T:C	2.0933e-07	-0.60722	0.112361	0.000706317	0.1541	NR1
LGALS3	14:55119869:T:C	1.00715e-17	-0.588267	0.0613669	7.21813e-13	0.153602	PR1
CD8A	2:86789383:A:G	2.32669e-10	0.755708	0.112204	1.02414e-06	0.153266	PR1
VMO1	17:4783119:A:C	1.88651e-11	0.553669	0.0769612	3.1661e-07	0.153207	PR2
CLPS	6:35852767:C:G	3.53679e-09	0.599208	0.0963233	1.67285e-05	0.152968	NR2
IL10RB	21:33287145:G:C	1.85416e-17	0.555715	0.0586375	2.10931e-12	0.152944	NR2
CA5A	16:87893616:T:C	5.42978e-13	0.668652	0.0857494	1.57179e-08	0.152412	NR2
CDSN	6:31081215:G:A	1.02625e-10	0.66935	0.0972259	5.16139e-06	0.152391	PR1
CRHBP	5:76876919:T:C	3.68172e-12	-0.565322	0.0755595	6.7338e-08	0.152068	PR2
CRISP2	6:49742392:G:A	2.98089e-11	0.554057	0.0780517	2.95426e-07	0.151709	NR1
CXCL6	4:73772199:C:T	5.41271e-13	0.571702	0.0733113	8.81938e-09	0.151349	NR2
SPINK5	5:148130632:C:T	2.56118e-12	0.552793	0.0733314	2.85565e-08	0.150943	PR1
TIMP3	22:32763106:A:G	4.02536e-15	-0.624672	0.0725568	2.55853e-10	0.150729	NR1
FRZB	2:182829772:C:T	2.71024e-10	-0.814212	0.121523	2.13892e-06	0.150711	NR1
CA5A	16:87893616:T:C	6.55172e-13	0.687243	0.0884155	1.85454e-08	0.150543	PR1
ADA	20:44542359:G:A	3.63948e-11	0.935305	0.132422	3.10635e-07	0.150239	NR1
BLMH	17:30244910:C:T	2.60407e-12	0.599535	0.0796652	2.12784e-08	0.150224	NR1
SERPINA12	14:94527267:C:T	1.7805e-09	0.623534	0.0981711	1.25138e-05	0.15018	NR2
ASAH2	10:50246241:G:T	5.08921e-10	0.567758	0.0862343	2.95254e-06	0.149713	NR1
TCN2	22:30624354:G:T	1.42466e-10	-0.810981	0.118957	1.43153e-06	0.149517	NR1
TNFRSF10A	8:23225458:G:T	1.31022e-11	-0.548891	0.0757716	1.96898e-07	0.149496	NR1
NAAA	4:75935911:G:C	2.50486e-09	-0.595771	0.0946469	1.85686e-05	0.149373	PR2
GLO1	6:38673578:C:T	6.34931e-13	-0.549125	0.0706623	2.03897e-08	0.148089	NR2
OBP2B	9:133205098:G:T	1.94162e-12	0.653823	0.0861857	2.98741e-08	0.14791	PR1
CLUL1	18:589353:G:C	1.42639e-09	0.583839	0.091319	7.72181e-06	0.14784	NR2
TXNDC15	5:134887903:A:G	1.17882e-08	0.995298	0.166037	4.82802e-05	0.147733	PR2
GALNT3	2:165777217:G:A	4.02644e-07	0.543475	0.10313	0.000686931	0.147646	PR1
CD48	1:160684968:C:G	5.4397e-14	-0.929844	0.11349	1.24947e-09	0.147605	PR1
INHBC	12:57285631:G:A	1.34382e-15	-0.805199	0.0913676	5.96735e-11	0.147509	PR2
PBLD	10:68276805:C:T	4.09039e-11	0.724202	0.102798	4.09481e-07	0.147472	NR2
SERPINA9	14:94462135:T:C	1.40252e-08	-0.729469	0.12239	9.92616e-05	0.146571	PR2
GPR37	7:124456673:C:A	4.7341e-11	-0.724683	0.103171	4.56128e-07	0.146489	PR1
CST7	20:24991697:C:T	6.85027e-12	-0.682704	0.0927875	7.77592e-08	0.146255	NR1
ARSB	5:78991756:T:G	3.00533e-09	-0.558687	0.0893892	1.26859e-05	0.146211	NR1
HAVCR1	5:157000648:G:A	6.39212e-13	0.564885	0.0727011	1.70974e-08	0.145915	NR2
CNPY4	7:100203733:C:T	2.77834e-10	-0.821307	0.122537	1.7354e-06	0.145565	PR1
FUT3_FUT5	19:5841345:G:T	1.41345e-07	-1.20865	0.22005	0.000526477	0.144958	PR2
CRHBP	5:76877394:G:T	6.1538e-12	-0.548589	0.0742779	8.3178e-08	0.144519	PR1
COMT	22:19962712:C:T	1.7121e-14	-0.537313	0.064145	3.52336e-10	0.144337	NR2
FRZB	2:182833872:T:C	2.62926e-10	-0.789886	0.117754	1.97654e-06	0.144195	NR2
CLPS	6:35785450:T:C	1.73109e-09	0.547957	0.0860883	1.36847e-05	0.143869	PR2
CTRB1	16:75221615:C:T	1.88839e-08	1.11561	0.18931	6.60122e-05	0.143753	NR1
BTN3A2	6:26354552:A:C	6.44948e-12	-1.04548	0.141592	2.04822e-07	0.143591	PR2
IL5RA	3:3111246:G:T	1.30358e-08	-0.636321	0.106566	7.39263e-05	0.143577	PR1
LYPD8	1:248771492:T:C	6.17903e-08	0.948293	0.167633	9.53846e-05	0.143125	NR2
ENTPD5	14:74007693:T:C	9.30805e-09	-1.07149	0.177636	3.36732e-05	0.142874	NR1
CCL18	17:36065520:G:A	1.16683e-14	-0.70856	0.0839993	3.66403e-10	0.142867	NR1
SPARCL1	4:87501221:T:C	6.67555e-33	0.548437	0.0367512	5.33089e-25	0.142411	PR1
KIR3DL1	19:54861907:T:G	2.24425e-07	-0.553931	0.102655	0.000828746	0.142048	PR2
TEK	9:27214581:T:C	4.34212e-10	1.02147	0.1543	4.8321e-06	0.141748	PR1
FCRLB	1:161714831:T:G	1.59554e-07	-0.587982	0.107648	0.000389546	0.141544	NR2
NCAM2	21:21463626:A:G	5.69913e-11	0.542362	0.0776417	6.3573e-07	0.14089	NR2
CA4	17:60131391:C:T	1.25376e-10	-0.971952	0.141824	7.44315e-07	0.140884	PR2
IDUA	4:959910:A:C	7.27505e-08	0.532709	0.0947494	0.000230809	0.140397	NR1
CLEC6A	12:8507324:C:T	1.44011e-08	-0.550321	0.0924138	4.9853e-05	0.140203	PR2
CRHBP	5:76911950:A:T	2.31725e-12	-0.53739	0.0712169	6.10158e-08	0.140004	NR1
ADAM23	2:206454929:C:T	2.4396e-09	1.03122	0.163798	1.63687e-05	0.1397	PR1
OGN	9:92268862:T:C	3.06661e-19	0.545969	0.0539928	7.22357e-14	0.13963	NR1
SORCS2	4:7218180:G:A	4.81423e-10	-0.543415	0.0822667	7.27654e-06	0.139454	PR2
GP6	19:55025227:G:A	2.90244e-10	0.763508	0.113969	4.4988e-06	0.139316	PR2
PRTG	15:55709576:C:T	3.8801e-09	0.565515	0.0911949	2.39283e-05	0.139298	NR1
FUT8	14:65370785:C:T	2.55348e-11	-0.923271	0.129562	3.7209e-07	0.13927	NR1
PRTN3	19:839642:G:A	8.7216e-13	0.612189	0.0792588	1.4547e-08	0.139057	PR1
PRTN3	19:840839:T:C	1.3815e-11	0.628261	0.08684	1.91408e-07	0.139039	NR1
TYMP	22:50539595:C:A	7.14864e-09	0.566208	0.0929939	4.13401e-05	0.138765	PR1
CDHR5	11:620927:A:C	5.79065e-10	0.700948	0.106671	6.71448e-06	0.138755	PR2
CTSB	8:11835129:C:T	5.53375e-10	0.622851	0.0947298	6.51499e-06	0.138653	PR1
LY9	1:160789262:A:G	8.21912e-11	0.629485	0.0909722	7.95902e-07	0.138472	NR2
ADAM8	10:133269306:C:T	1.79001e-08	-0.785402	0.132927	7.12244e-05	0.137952	PR1
CDHR5	11:620599:G:T	5.02835e-09	0.563682	0.0916357	2.96356e-05	0.137807	NR1
CLEC4D	12:8545495:G:T	1.5884e-13	0.527292	0.0658017	2.74585e-09	0.137784	PR1
CTSB	8:11770620:A:C	1.83765e-09	0.630999	0.0993119	2.6214e-05	0.137764	PR2
CD48	1:160684968:C:G	3.75713e-14	-0.79829	0.0968038	1.19936e-09	0.137559	NR2
WFDC12	20:45131820:A:G	5.53252e-11	-0.528573	0.0754941	6.28476e-07	0.136903	PR2
PRTG	15:55735815:G:T	4.6813e-10	0.540635	0.0817814	4.64225e-06	0.136525	PR2
CNTNAP2	7:145636777:G:A	1.12863e-10	-0.609584	0.0887673	8.5775e-07	0.13588	PR1
MSLN	16:760593:C:A	2.008e-09	0.743004	0.117402	1.14957e-05	0.135775	NR2
CD48	1:160704830:A:G	5.82668e-14	-0.841003	0.102685	2.32133e-09	0.135531	PR2
SCARF1	17:1638896:G:A	9.12251e-16	-0.549128	0.0620128	3.77102e-11	0.135529	NR2
CLUL1	18:590969:C:T	3.32201e-10	0.542527	0.0813436	2.82516e-06	0.135404	PR1
PPCDC	15:74986899:T:G	4.72357e-14	0.981861	0.119495	1.1382e-09	0.135262	PR1
TNFRSF13C	22:41930162:T:C	6.24606e-08	-1.00651	0.177994	0.000161804	0.135022	NR2
CDSN	6:31122513:C:T	1.32983e-09	0.520826	0.0812951	3.538e-05	0.134931	NR2
CD177	19:43287246:G:A	1.99965e-07	-1.13817	0.210087	0.000271294	0.1346	PR1
CRISP2	6:49742392:G:A	2.02294e-09	0.521598	0.0824359	9.93571e-06	0.134455	NR2
IL1RL2	2:102162001:T:C	4.42411e-07	-0.519435	0.0988997	0.000987614	0.134281	PR2
CXCL1	4:73868951:T:C	1.24506e-11	0.54981	0.0758045	8.57596e-08	0.133831	NR1
CLEC11A	19:50711843:A:G	1.91099e-10	1.07641	0.159082	1.60181e-06	0.133829	NR2
FCRL1	1:157802090:C:T	1.02664e-09	-0.516868	0.0800694	5.64318e-06	0.133562	NR2
FCN2	9:134879836:A:G	3.58087e-14	-0.517179	0.0625906	1.05119e-09	0.13344	PR1
ASAH2	10:50247994:C:A	4.4954e-07	0.533588	0.101661	0.000868566	0.133367	PR2
IL16	15:81298434:G:C	7.17931e-19	-1.04245	0.104233	1.16234e-13	0.13293	PR1
CD48	1:160684968:C:G	1.18672e-13	-0.783986	0.0973811	1.63539e-09	0.132674	NR1
LY9	1:160791495:G:A	5.14728e-10	0.544602	0.0826597	4.01548e-06	0.132162	PR1
TCN2	22:30612758:A:G	1.04438e-10	0.651253	0.0947108	1.00486e-06	0.131757	NR2
TREML2	6:41200025:A:G	1.69966e-10	-0.819475	0.120729	1.27564e-06	0.131755	NR2
CSTB	21:43781951:G:A	1.10222e-14	-0.531088	0.0628576	6.54496e-10	0.131755	NR2
NCAM2	21:21463626:A:G	2.16448e-11	0.524333	0.073278	2.52565e-07	0.131678	NR1
DLK1	14:100706787:A:C	5.78744e-10	-0.629452	0.0959203	3.8071e-06	0.13158	NR2
CLSTN2	3:139916951:G:A	8.95289e-07	0.977153	0.191769	0.00169553	0.131441	NR2
LGALS3	14:55102860:C:T	5.57663e-13	-1.05635	0.135294	1.65257e-08	0.131405	PR2
NID2	14:52021048:T:C	4.819e-14	0.51298	0.0624565	1.73454e-09	0.131214	PR1
CXCL1	4:73868951:T:C	6.23177e-11	0.544237	0.0780896	2.48874e-07	0.131131	NR2
GLO1	6:38682852:T:G	8.85397e-14	-0.526139	0.0649579	1.37047e-09	0.130709	NR1
CTRB1	16:75225453:C:A	2.7598e-09	1.02477	0.163487	1.58574e-05	0.130686	NR2
CNPY4	7:100217485:C:T	1.00717e-07	-0.739606	0.133124	0.000202791	0.130508	NR1
DDR1	6:30835477:A:T	3.85981e-10	-0.522108	0.0785532	1.72366e-05	0.130321	PR2
FAM3B	21:41344348:G:A	2.72679e-08	-0.972881	0.16716	0.000161182	0.130294	NR1
CXCL6	4:73772199:C:T	4.04171e-14	0.530158	0.064416	5.32088e-10	0.130152	NR1
ADAM22	7:87935182:C:G	1.75298e-10	-0.510919	0.0752239	1.62074e-06	0.130086	PR2
AMY2A	1:103497405:T:A	2.08412e-08	-0.579949	0.0987132	5.1268e-05	0.129919	NR2
GZMB	14:24586146:G:A	3.36478e-07	-0.604499	0.113885	0.000735381	0.129576	PR1
LY6D	8:142764296:T:C	3.72337e-10	-0.511246	0.0768419	3.54671e-06	0.129393	PR2
GP6	19:55025227:G:A	2.2306e-09	0.735574	0.116522	2.12784e-05	0.129308	PR1
SPON1	11:14055495:A:T	2.81138e-15	0.510694	0.0587536	2.38376e-10	0.129246	PR2
PPCDC	15:75004660:G:A	7.6426e-12	0.930708	0.12656	1.09833e-07	0.129181	PR2
OGN	9:92302280:G:C	1.01459e-20	0.517946	0.0485008	1.22836e-14	0.128825	PR2
ICOSLG	21:44233876:A:G	2.70837e-07	0.604736	0.113032	0.000786761	0.128822	NR1
IL2RA	10:6040595:C:T	1.07911e-11	0.817647	0.112298	2.27941e-07	0.128487	NR2
LGALS3	14:55395805:A:G	3.09013e-11	-0.936374	0.132029	2.41369e-07	0.128309	NR1
THBS2	6:169224606:C:A	2.46928e-11	0.82576	0.115737	3.777e-07	0.128297	NR2
EBI3_IL27	19:4259517:C:T	1.75586e-09	-0.542601	0.0853933	1.13969e-05	0.128238	NR2
IL17RA	22:17142785:T:C	5.27147e-07	0.608036	0.116604	0.00127666	0.12792	PR2
TNFRSF10A	8:23226033:T:C	2.27719e-12	-0.517824	0.0685075	3.99221e-08	0.127893	PR1
CLPS	6:35785450:T:C	1.24102e-08	0.516569	0.0863712	4.35798e-05	0.127859	PR1
SERPINA9	14:94462135:T:C	2.66015e-07	-0.681316	0.127167	0.00080966	0.127859	PR1
CD177	19:43351067:T:A	1.2845e-06	0.59327	0.118288	0.00143938	0.127834	NR1
PRTG	15:55709576:C:T	1.27691e-08	0.540154	0.0904509	5.16215e-05	0.127084	NR2
GALNT3	2:165695298:A:G	1.45417e-08	0.518974	0.0871779	7.86909e-05	0.126856	PR2
SCG3	15:51674514:A:G	8.89735e-13	0.602638	0.0779844	2.39149e-08	0.126709	PR2
IL1R2	2:102007764:G:A	1.32282e-09	-0.524477	0.081799	8.54291e-06	0.126544	PR1
GCNT1	9:76491736:C:G	2.67264e-08	-0.591431	0.10141	0.000181991	0.12599	PR2
IGF2R	6:160073489:C:T	5.26955e-09	0.664853	0.10821	2.56725e-05	0.125785	NR2
INHBC	12:57285631:G:A	4.9296e-11	-0.749921	0.106956	3.61901e-07	0.125713	NR2
MEGF10	5:127287611:T:A	8.35873e-09	0.50248	0.0828925	3.45986e-05	0.125565	PR2
FCGR3B	1:161647551:C:T	6.02875e-11	-0.537114	0.0768841	7.36457e-07	0.125421	PR2
GALNT3	2:165754317:C:T	1.02866e-05	0.508604	0.111945	0.0101639	0.125407	NR2
NFASC	1:204975977:G:A	1.38529e-08	1.05182	0.176504	5.35072e-05	0.125201	PR1
KIR2DL3	19:55279723:C:T	2.99855e-06	0.500737	0.103684	0.00630052	0.1252	PR1
TXNDC15	5:134971200:C:T	3.23159e-07	0.902107	0.169679	0.000671293	0.124922	PR1
INHBC	12:57445390:G:T	2.10364e-13	-0.753238	0.0945574	3.92917e-09	0.124668	PR1
SLAMF7	1:160744058:T:C	2.79344e-08	-0.5574	0.0957204	9.79497e-05	0.124581	PR2
CCL14	17:35985301:T:C	8.77181e-19	-0.956704	0.0959605	1.16234e-13	0.124342	PR1
FUCA1	1:23843968:C:T	2.95806e-07	-0.568307	0.106593	0.000565267	0.123961	NR1
APEX1	14:20456995:T:G	1.6283e-14	-0.505699	0.0603112	3.81361e-10	0.123746	NR2
SPARCL1	4:87507544:G:A	4.26208e-25	0.509272	0.0418698	1.98223e-18	0.123663	NR1
GPR37	7:124490162:A:G	1.04373e-08	-0.625561	0.103943	4.5839e-05	0.123493	PR2
CDNF	10:14899056:T:G	4.01329e-09	0.527489	0.0851262	2.91298e-05	0.123185	NR2
IL5RA	3:3111510:G:A	1.0847e-06	-0.586888	0.116034	0.0045041	0.123104	PR2
CLUL1	18:590969:C:T	4.38289e-09	0.516718	0.0835138	3.16801e-05	0.122828	PR2
HSPB1	7:76294901:G:T	9.98707e-07	-0.570336	0.112408	0.00152262	0.122406	PR1
LILRA5	19:54316893:G:A	6.68845e-10	-0.58659	0.0897568	4.097e-06	0.122161	NR2
LY9	1:160789729:T:C	7.24182e-10	0.522143	0.0799686	5.18554e-06	0.121953	PR2
SERPINA11	14:94456095:T:C	3.13056e-09	-0.514498	0.0824217	2.21603e-05	0.121825	NR1
IL17RA	22:17134894:G:A	1.55687e-06	0.608614	0.122307	0.00227304	0.121522	PR1
IL1RL2	2:102236305:C:T	8.98668e-07	-0.504548	0.0989924	0.00133171	0.12113	PR1
ADA	20:44522114:G:A	9.60069e-12	0.875844	0.119854	1.30258e-07	0.121087	PR1
OGN	9:92293147:A:T	1.27477e-17	0.512229	0.0537139	1.57249e-12	0.120753	NR2
KLK13	19:51030161:C:G	3.35259e-08	-0.512173	0.0886299	0.000125629	0.120726	NR1
CGREF1	2:27086791:A:C	3.58415e-08	-0.496558	0.0861273	9.11739e-05	0.120558	NR1
TCN2	22:30622238:T:C	5.59784e-09	0.490619	0.0799071	3.7378e-05	0.12034	PR2
LY6D	8:142806152:G:T	5.98899e-11	0.50356	0.072206	8.00282e-07	0.120331	NR1
LY6D	8:142806152:G:T	3.18279e-11	0.503535	0.071024	4.09481e-07	0.120319	NR2
HPGDS	4:94355382:T:C	1.72745e-06	0.511106	0.103147	0.00355231	0.120174	PR2
FCRL1	1:157802090:C:T	3.44324e-09	-0.489953	0.0787193	1.64672e-05	0.120014	NR1
NT5E	6:85405564:G:C	1.38525e-08	-0.745417	0.125193	5.36458e-05	0.119941	NR1
MSR1	8:16193364:T:G	7.93793e-13	-0.707921	0.0913769	5.90927e-08	0.119769	PR2
FRZB	2:182835041:G:A	1.06446e-06	-0.744957	0.147229	0.00194845	0.119759	PR1
CLUL1	18:589353:G:C	1.65891e-07	0.525432	0.0963624	0.000462228	0.119739	NR1
SMPD1	11:6394233:G:A	8.29219e-07	-0.625615	0.122404	0.00186748	0.119096	NR1
CD177	19:43351067:T:A	1.50105e-06	0.572168	0.114843	0.0017062	0.118902	NR2
IL16	15:81299298:G:A	6.51271e-13	-1.10532	0.142314	1.40404e-08	0.11888	NR2
CCL14	17:35983666:A:G	3.89689e-20	-0.944034	0.0905096	5.50347e-15	0.11878	NR1
APEX1	14:20456995:T:G	4.62622e-15	-0.505582	0.0587174	1.88479e-10	0.118694	PR2
VWF	12:5437687:G:T	8.76575e-07	-1.09337	0.214291	0.00170076	0.118625	PR1
FGF5	4:80263187:A:T	3.36915e-10	0.584561	0.0876177	2.72486e-06	0.118233	PR2
MARCO	2:118904998:C:G	6.64621e-10	-0.631618	0.0965644	3.94476e-06	0.118088	PR1
FCN2	9:134879836:A:G	4.75333e-13	-0.486166	0.06205	1.17955e-08	0.117916	PR2
PAEP	9:135575920:A:C	1.6347e-08	0.632715	0.10685	8.54918e-05	0.117914	NR1
AMY2B	1:103493407:T:C	9.25674e-09	0.609841	0.101055	2.54278e-05	0.117861	NR2
CLEC11A	19:50711843:A:G	2.43939e-08	1.00977	0.172839	0.000107323	0.117771	NR1
SERPINA9	14:94454993:G:C	9.90226e-07	-0.618473	0.121902	0.00278877	0.117615	NR2
SMOC2	6:168409009:G:A	2.25038e-09	0.494931	0.0784723	1.74688e-05	0.117579	NR2
S100A4	1:153547505:C:G	6.62477e-10	0.895685	0.137061	3.58821e-06	0.1174	NR1
CA4	17:60131391:C:T	8.17073e-10	-0.887078	0.136425	2.50375e-06	0.117353	PR1
EBI3_IL27	19:4247341:G:C	8.04502e-09	-0.520549	0.0857674	5.31684e-05	0.117288	PR2
KIR2DL3	19:54888962:G:A	5.77114e-06	0.818001	0.174727	0.01549	0.117066	PR2
TGFB1	19:41341955:G:A	8.79012e-11	-0.97812	0.141392	1.08601e-06	0.11703	PR2
CDH6	5:31123036:A:G	2.70148e-09	0.881362	0.140517	1.72252e-05	0.117015	NR2
DLK1	14:100706787:A:C	3.3108e-09	-0.593286	0.0952067	1.38599e-05	0.116894	NR1
CLPS	6:35852767:C:G	3.71339e-07	0.52361	0.0991038	0.000801907	0.116805	NR1
PSIP1	9:16088253:C:G	2.43708e-06	-0.871258	0.178676	0.00587625	0.116524	PR1
C1QA	1:22635031:C:T	1.91347e-08	-0.507065	0.0860117	7.53541e-05	0.116291	PR1
KLRD1	12:10318451:A:G	5.95623e-08	-0.490077	0.0864282	0.000253756	0.116282	PR2
IL1R2	2:101994530:T:C	5.37234e-09	-0.549969	0.0895658	2.32137e-05	0.11609	NR2
SMPD1	11:6389167:T:C	1.3204e-05	-0.491892	0.109694	0.0173521	0.115888	NR2
CXCL1	4:73872737:C:G	1.15593e-09	0.536766	0.0833294	4.4988e-06	0.115528	PR2
LBP	20:38349567:G:A	1.5433e-14	0.920588	0.109443	7.96976e-10	0.115132	PR2
TIMP3	22:32763106:A:G	7.84032e-16	-0.538985	0.0606294	4.51917e-11	0.115116	PR1
PRTN3	19:840839:T:C	4.93242e-10	0.571334	0.0866721	2.48281e-06	0.114984	NR2
FCRL2	1:157709901:C:T	3.657e-09	0.558542	0.0897673	1.72366e-05	0.11492	PR2
ICAM3	19:10341244:C:T	2.16353e-09	0.502843	0.0796569	1.12162e-05	0.114852	NR1
TREML2	6:41198081:C:T	2.35629e-09	-0.742896	0.117988	1.24918e-05	0.114835	NR1
FCGR2B	1:161509955:A:G	3.82098e-07	-0.492443	0.093312	0.000829584	0.114503	NR1
SLAMF7	1:160740367:G:A	6.57961e-07	-0.524096	0.101481	0.00121557	0.114434	PR1
SIGLEC10	19:51408764:T:C	2.10101e-09	-0.671338	0.106086	2.54894e-05	0.114431	PR2
CD8A	2:86789383:A:G	2.40319e-08	0.676884	0.115801	4.22859e-05	0.114353	NR1
LPL	8:19989069:C:A	2.71798e-08	-0.74834	0.128531	0.000191292	0.114322	NR2
ADAM23	2:206548901:G:A	1.68587e-08	0.565481	0.0954594	9.60011e-05	0.114287	PR2
IL12A_IL12B	5:159342745:T:C	1.29712e-08	0.522113	0.0874252	5.40772e-05	0.114149	PR1
CXCL6	4:73838282:C:T	8.11766e-11	0.501394	0.072328	5.50372e-07	0.114107	PR2
CD8A	2:86789383:A:G	1.10943e-07	0.65068	0.117392	0.000172668	0.113625	PR2
PRTN3	19:839642:G:A	8.77633e-11	0.553062	0.0799444	1.07082e-06	0.113493	PR2
MCFD2	2:46903009:G:T	3.89849e-08	0.604918	0.105147	0.000178004	0.11313	PR1
FLRT2	14:85609613:G:T	9.18066e-09	0.75888	0.125718	4.31292e-05	0.112991	NR2
MEGF10	5:127287611:T:A	5.55889e-08	0.474791	0.0836348	0.000122321	0.112713	NR1
PROK1	1:110450727:G:A	1.27312e-09	0.616969	0.0961162	7.62523e-06	0.112674	PR1
CSTB	21:43781951:G:A	5.86575e-12	-0.490393	0.066266	1.32976e-07	0.112649	PR2
TCN2	22:30617562:G:A	5.55803e-10	0.474654	0.0721994	3.79239e-06	0.112497	PR1
S100A4	1:153544696:T:C	4.20267e-09	0.997005	0.161029	1.13215e-05	0.112492	PR1
ADA	20:44626579:T:C	8.35031e-10	0.808494	0.1245	4.333e-06	0.112261	NR2
CALCOCO1	12:53715875:C:T	5.77532e-09	0.581143	0.0948587	2.2693e-05	0.112158	NR2
MATN2	8:97978993:A:G	2.48124e-08	0.51851	0.0886811	8.90905e-05	0.112008	PR2
MMP3	11:102842889:T:C	2.97771e-14	0.47566	0.0574119	1.27732e-09	0.111936	NR2
IL16	15:81305769:C:T	2.73839e-14	-0.974922	0.117231	1.21852e-09	0.111928	PR2
TFRC	3:196104227:A:C	5.51662e-08	-0.477367	0.0840441	0.000201997	0.111914	NR2
FLRT2	14:85609613:G:T	7.98077e-10	0.754688	0.116101	7.54409e-06	0.111746	NR1
CCL3	17:36069898:A:G	3.77854e-09	0.520916	0.0839088	1.58574e-05	0.111685	NR2
FCRL1	1:157802090:C:T	5.70801e-08	-0.47224	0.0831555	0.000204504	0.111395	PR2
CPXM1	20:2803125:A:G	9.37205e-17	-0.847047	0.0918697	7.65537e-12	0.111147	NR2
CCL23	17:35999179:A:C	1.01405e-07	0.672214	0.121024	0.000250324	0.111135	NR1
KLK13	19:51035305:G:T	3.07357e-07	-0.49463	0.0928938	0.00102371	0.111131	NR2
TGFB1	19:41341955:G:A	7.12313e-10	-0.952647	0.145933	3.95735e-06	0.111013	PR1
HAVCR1	5:157036347:C:T	4.63669e-12	0.499276	0.0672361	9.76276e-08	0.11079	NR1
CES1	16:55816819:G:A	2.17164e-10	-0.989161	0.146484	2.01529e-06	0.110728	PR2
MMP3	11:102798678:T:C	1.89388e-09	-0.485418	0.0764681	1.47133e-05	0.110681	PR2
LYPD3	19:43455236:G:A	3.65349e-08	0.582253	0.101032	7.91838e-05	0.110554	NR2
IL12B	5:159342745:T:C	1.70417e-08	0.513652	0.0867912	6.60353e-05	0.110479	PR1
FUT3_FUT5	19:5841345:G:T	2.22877e-07	-1.01836	0.188855	0.000677724	0.110401	NR2
LILRB1	19:54292777:G:A	2.23807e-09	-0.881167	0.139731	1.38257e-05	0.110266	NR1
VAMP5	2:85455976:G:A	3.61366e-06	0.520908	0.108814	0.00423417	0.110053	PR1
IGF2R	6:160073489:C:T	1.55704e-08	0.621655	0.104812	6.06634e-05	0.109971	NR1
CLEC6A	12:8492654:C:A	4.7919e-08	-0.616295	0.107905	0.00011132	0.109867	PR1
CEACAM1	19:42516859:G:C	4.87647e-07	-0.69485	0.132887	0.00042464	0.109848	PR1
ADAM8	10:133269306:C:T	1.35744e-07	-0.700611	0.12736	0.00042591	0.109773	PR2
FCGR3B	1:161627387:C:G	2.60181e-09	-0.493117	0.0785285	1.275e-05	0.109685	NR2
MMP3	11:102800966:C:T	2.99007e-09	-0.471481	0.0753549	1.52606e-05	0.109673	PR1
CCL3	17:36084936:G:A	5.78001e-10	0.567617	0.0863759	5.02894e-06	0.109588	PR2
FCRL5	1:157544014:G:A	8.10407e-08	-0.559815	0.0998346	0.000251686	0.109341	PR2
SFTPA2	10:79558907:C:G	2.55553e-07	0.642672	0.119821	0.00066897	0.108995	NR2
TNFRSF10A	8:23216289:C:G	5.2202e-11	0.482348	0.068789	8.8254e-07	0.108983	PR2
CD177	19:43287246:G:A	2.44252e-06	-1.02399	0.209936	0.0028657	0.108948	PR2
OSCAR	19:54073506:G:A	4.25343e-11	0.468076	0.0665332	4.21394e-07	0.108899	NR1
S100P	4:6707618:T:C	1.33723e-06	-0.889333	0.177631	0.00479492	0.108877	NR1
TNFRSF10C	8:23074609:A:C	6.12736e-06	0.537787	0.115214	0.0147455	0.108833	PR2
NT5E	6:85489515:A:G	1.04533e-07	-0.529004	0.0953251	0.000256603	0.108777	NR2
VWC2	7:49775794:C:G	4.41782e-08	-0.468252	0.0817497	0.000138599	0.108761	PR1
FRZB	2:182835041:G:A	4.08937e-06	-0.709594	0.149049	0.00760452	0.108659	PR2
F7	13:113115325:T:G	3.40285e-21	-0.597038	0.0552182	1.5051e-15	0.108464	NR2
PBLD	10:68279014:G:A	1.21248e-09	0.598067	0.0929761	7.92889e-06	0.108249	PR2
CCL4	17:36097317:T:A	8.14823e-06	0.524175	0.114	0.00895721	0.108115	NR2
ALPP	2:232453514:T:C	5.12564e-07	0.506704	0.0970589	0.00178418	0.108049	PR2
SMOC2	6:168394268:C:T	2.75008e-10	0.4858	0.0724078	3.97021e-06	0.107857	PR2
CCL15	17:36025195:T:G	1.23558e-09	0.905539	0.140854	6.84757e-06	0.107723	PR2
NELL1	11:20935979:T:C	4.37595e-07	0.719167	0.137023	0.00142824	0.107616	NR1
FLRT2	14:85632958:A:G	3.21605e-07	-0.620513	0.116636	0.00120681	0.107402	PR2
ANGPTL4	19:8381172:G:A	3.07881e-08	0.46448	0.0801191	0.000119911	0.107391	NR2
CXCL6	4:73838282:C:T	1.09453e-09	0.486404	0.0754413	3.41807e-06	0.107386	PR1
WFDC12	20:45131820:A:G	1.26664e-08	-0.467756	0.0782621	4.77344e-05	0.107212	PR1
INHBC	12:57285631:G:A	1.86361e-09	-0.692431	0.109201	6.4972e-06	0.107177	NR1
CD300E	17:74575558:T:C	3.99251e-11	-0.463287	0.0656713	4.38691e-07	0.107023	PR1
TNFRSF11A	18:62355873:C:T	2.50957e-13	-0.5911	0.0744101	7.70966e-09	0.106886	PR2
ADAM23	2:206548901:G:A	4.44457e-07	0.550269	0.104886	0.00101861	0.106661	NR2
SSC4D	7:76408093:C:T	2.15688e-08	0.844532	0.143835	7.97201e-05	0.106366	PR1
FCRL2	1:157795174:C:T	8.0039e-08	0.595983	0.106292	0.000180673	0.106322	PR1
BAIAP2	17:81510993:G:A	3.10948e-06	-0.566026	0.117402	0.00582437	0.10609	PR1
IL1R2	2:101999692:T:G	2.71759e-08	-0.472216	0.0811265	9.24001e-05	0.106073	NR1
GCNT1	9:76503413:G:A	2.31966e-07	-0.541945	0.100612	0.000859951	0.105789	PR1
FCRLB	1:161718641:T:C	8.53845e-07	0.889603	0.174271	0.00174432	0.105478	NR1
TYMP	22:50538325:T:C	4.59658e-09	0.506222	0.0820397	2.30024e-05	0.105473	NR2
ADAM8	10:133269306:C:T	7.81649e-11	-0.718531	0.103743	7.55464e-07	0.105396	NR1
SPARCL1	4:87507544:G:A	8.90844e-21	0.47013	0.0440819	8.72048e-15	0.105384	NR2
PAEP	9:135575920:A:C	1.53952e-08	0.59813	0.10078	7.55387e-05	0.105375	NR2
GLO1	6:38682852:T:G	6.05222e-10	-0.466815	0.0711787	6.00803e-06	0.105299	PR1
LEFTY2	1:225850913:A:T	2.56759e-12	-0.468198	0.0621668	5.41276e-08	0.10522	NR2
SLIT2	4:19827565:T:C	4.07808e-05	-0.479688	0.113959	0.0384402	0.10522	NR1
CNTNAP2	7:145495027:C:T	6.58998e-08	0.517008	0.0916287	0.000171008	0.105179	NR1
EBI3_IL27	19:4236391:G:A	1.79372e-08	-0.490651	0.0830469	8.96765e-05	0.105112	PR1
CD274	9:5451557:C:T	1.9253e-09	0.506989	0.0800333	1.0876e-05	0.104671	NR1
NT5C3A	7:33063693:A:C	1.08291e-06	-0.479046	0.0947465	0.0018945	0.104524	PR1
CCL23	17:35999179:A:C	5.59418e-07	0.660961	0.127064	0.00113932	0.104406	PR2
MSLN	16:760593:C:A	8.5389e-10	0.651158	0.100369	5.9601e-06	0.104282	NR1
IL10RB	21:33283765:T:C	1.04759e-09	0.456285	0.0706795	6.31819e-06	0.104027	PR1
CEACAM1	19:42493412:A:G	1.23709e-07	-0.663384	0.120172	0.000183639	0.103503	PR2
CCL3	17:36080352:T:A	2.57141e-09	0.508268	0.0809373	1.04491e-05	0.103457	NR1
SHMT1	17:18361135:A:G	2.20778e-12	0.488935	0.0646961	3.41277e-08	0.103233	NR2
VWC2	7:49775794:C:G	2.83579e-08	-0.455309	0.0782293	0.00013748	0.102832	PR2
CPXM1	20:2803760:A:C	9.07421e-16	0.462121	0.0520603	1.15953e-10	0.102551	PR2
IL12B	5:159342745:T:C	5.69322e-08	0.49472	0.0871059	0.000241583	0.102485	PR2
GALNT3	2:166080585:T:C	2.7995e-07	-0.460711	0.0862242	0.00059752	0.102097	NR1
FLRT2	14:85615776:G:A	1.0262e-07	-0.714426	0.128585	0.000358697	0.101973	PR1
SERPINA11	14:94456095:T:C	8.50492e-09	-0.470454	0.0777444	6.24746e-05	0.10186	NR2
MATN2	8:97978993:A:G	1.77292e-07	0.477506	0.0877748	0.000333064	0.101725	NR2
TNFRSF13C	22:41843344:G:C	9.20706e-08	-0.713547	0.127914	0.000224515	0.101722	PR1
SIGLEC10	19:51413952:A:C	8.81678e-08	-0.662407	0.118557	0.000358938	0.10152	PR1
CCL23	17:35999179:A:C	4.15676e-09	0.651656	0.105215	1.89737e-05	0.101487	PR1
LILRB1	19:54298734:T:G	5.46438e-08	-0.878142	0.154389	0.000292436	0.101304	PR2
CD274	9:5453260:A:G	9.53133e-08	0.501167	0.0899098	0.000378371	0.101294	PR2
CDHR5	11:648715:C:A	2.52605e-07	-0.615262	0.114659	0.000677724	0.101225	NR2
IL2RA	10:6040595:C:T	2.38929e-10	0.725415	0.107898	2.69229e-06	0.101135	NR1
FUT3_FUT5	19:5841345:G:T	6.50326e-07	-0.973845	0.188597	0.00156636	0.10096	NR1
PDLIM7	5:176741506:C:A	6.18648e-07	-0.569705	0.110101	0.00121532	0.100826	NR1
CNPY4	7:100036110:G:A	8.36268e-07	-0.455874	0.0892068	0.00115416	0.100752	NR2
FCGR3B	1:161647551:C:T	2.94858e-09	-0.481388	0.0769053	1.47302e-05	0.100746	PR1
C1QA	1:22635031:C:T	1.49006e-07	-0.471779	0.086065	0.000460088	0.100669	PR2
SERPINA9	14:94462135:T:C	5.1075e-06	-0.594446	0.126332	0.0107772	0.100555	NR1
PRTG	15:55735815:G:T	1.9239e-07	0.463859	0.0854933	0.000429029	0.100502	PR1
IL15RA	10:5955857:C:T	1.63779e-05	-0.470317	0.106065	0.0296615	0.100401	PR1
HBQ1	16:231300:G:A	1.1817e-10	0.608618	0.0887996	6.67927e-07	0.100341	NR2
MEGF10	5:127287611:T:A	2.36522e-08	0.447527	0.0765009	4.92832e-05	0.10014	NR2
DLK1	14:100715444:A:G	1.25022e-08	0.50072	0.0836926	5.61419e-05	0.0999452	PR2
IL17RA	22:17142947:A:G	1.04753e-08	0.513633	0.0854545	3.407e-05	0.0999389	NR2
CHI3L1	1:203189101:T:C	7.76138e-10	0.632441	0.0972171	4.06164e-06	0.0998298	NR1
PSG1	19:43828897:T:C	4.08151e-06	-0.601945	0.126475	0.00289847	0.0998038	PR1
MLN	6:33811187:A:G	7.82036e-08	-0.447106	0.0797328	0.000321654	0.0996338	NR1
ADAM22	7:87615644:C:T	3.09544e-09	0.446346	0.0714134	1.11736e-05	0.0995441	PR1
ALPP	2:232421944:C:T	3.37293e-07	0.510668	0.096217	0.000914672	0.0994777	PR1
CGREF1	2:27118195:A:T	3.39785e-08	0.45247	0.0782722	8.34621e-05	0.0993089	PR1
CRTAM	11:122890217:C:T	1.35754e-06	-0.815891	0.162901	0.00346722	0.0992742	PR2
TYMP	22:50519091:G:A	1.5214e-08	0.509516	0.0857178	8.40095e-05	0.0990293	PR2
PON3	7:95326216:C:T	3.80768e-08	-0.451747	0.0784577	0.00011132	0.0989918	PR1
MSLN	16:760593:C:A	1.47051e-07	0.61142	0.111539	0.00037319	0.0989896	PR1
IL4R	16:27302790:A:G	3.26446e-06	-0.45547	0.0946504	0.00812656	0.0989469	PR2
MILR1	17:64468504:G:A	1.93731e-05	0.867126	0.197352	0.0105594	0.0987779	PR1
CD160	1:145845550:G:C	2.81194e-09	-0.445686	0.0711646	1.54615e-06	0.0986493	NR1
CD274	9:5461729:G:A	1.44203e-08	-0.493048	0.0828948	5.93849e-05	0.0984532	NR2
CD2AP	6:47585666:G:A	6.2004e-09	0.595241	0.0974069	2.94614e-05	0.0984201	NR1
LGALS3	14:55274019:T:C	2.37758e-10	-0.8083	0.120169	1.51573e-06	0.098419	NR2
SMOC2	6:168395110:A:G	2.64876e-10	0.461784	0.068807	2.67429e-06	0.0984125	PR1
CRISP2	6:49711004:G:A	1.41928e-07	0.687977	0.125337	0.000217372	0.098377	PR1
AGRN	1:1025561:G:C	7.99933e-10	-0.477708	0.0734956	2.64831e-06	0.0981117	NR1
SPINK6	5:148195643:A:G	8.59446e-07	0.445685	0.0872389	0.00142482	0.0979999	PR2
ADAM8	10:133269306:C:T	1.35601e-09	-0.692055	0.108084	6.91881e-06	0.0977721	NR2
CCL14	17:35985301:T:C	3.66621e-15	-0.84739	0.0979798	2.31109e-10	0.0975509	PR2
CD160	1:145757976:G:A	1.82457e-06	0.442916	0.0896428	0.000320727	0.0973102	PR1
CHI3L1	1:203189101:T:C	2.89377e-10	0.624276	0.0933103	1.30075e-06	0.0972688	NR2
NADK	1:1901262:C:T	1.16554e-08	0.444226	0.0741649	3.46868e-05	0.0971738	NR2
IL12A_IL12B	5:159338900:A:G	9.67327e-07	-0.632678	0.12447	0.00252158	0.0971708	PR2
CHI3L1	1:203186754:G:C	2.4054e-10	0.618562	0.0919247	1.75586e-06	0.0971469	PR1
LHPP	10:124469341:A:G	1.79195e-08	0.647804	0.109704	8.11354e-05	0.0969856	NR2
NCAM2	21:21506932:G:A	3.66304e-11	0.440095	0.0621986	5.66897e-07	0.0967754	PR2
MEGF10	5:127287611:T:A	7.21534e-07	0.439984	0.0855249	0.00107928	0.0962729	PR1
CRISP2	6:49779749:T:C	1.67928e-07	0.438405	0.0803417	0.000336588	0.0960995	PR2
FCGR3B	1:161647576:A:C	3.23049e-08	-0.470363	0.0812904	0.000109699	0.0959557	NR1
IGFBPL1	9:38409084:G:A	1.19552e-06	0.60639	0.1205	0.0017791	0.0957348	NR2
MSR1	8:16180494:T:C	1.00873e-09	-0.627899	0.0971558	1.48209e-05	0.0957083	PR1
HBQ1	16:231300:G:A	2.84477e-11	0.530342	0.0744768	3.1661e-07	0.0956674	PR2
MLN	6:33811187:A:G	1.1634e-07	-0.438402	0.0792746	0.000493087	0.0955819	PR1
FUCA1	1:23843968:C:T	1.14721e-05	-0.498682	0.110387	0.00970251	0.095448	NR2
CD300E	17:74574137:G:A	5.82204e-10	-0.485082	0.0738315	4.62498e-06	0.0954351	PR2
TNFRSF10C	8:23611575:C:T	1.18102e-05	-0.437955	0.0970591	0.0175613	0.0953108	PR1
LAIR1	19:54344298:C:A	1.79786e-10	-0.517965	0.0764243	1.67323e-06	0.09525	NR2
PXN	12:120224174:T:C	1.7622e-07	0.537916	0.0988797	0.000440756	0.0952298	NR1
GALNT10	5:154194378:C:T	2.20256e-07	0.44661	0.0827461	0.000623365	0.0951348	PR1
IGF2R	6:160073489:C:T	2.88876e-09	0.57637	0.0919633	1.94683e-05	0.0949593	PR2
CSTB	21:43781951:G:A	8.44367e-12	-0.4507	0.0615614	1.57661e-07	0.0948877	NR1
NFATC1	18:79787535:A:G	5.99443e-06	-0.517295	0.110745	0.00843037	0.0948875	PR1
LYPD3	19:43455236:G:A	1.24726e-07	0.539278	0.0978417	0.000243351	0.0948369	NR1
HBQ1	16:219907:A:G	9.18187e-10	-0.583701	0.0901598	4.06164e-06	0.0946409	NR1
CLEC10A	17:7100810:A:C	9.40872e-08	0.579677	0.104076	0.000331892	0.0944849	NR1
CNPY4	7:100203733:C:T	1.15026e-06	-0.66162	0.131143	0.00192399	0.0944635	PR2
CDHR5	11:620927:A:C	6.30808e-07	0.577302	0.111587	0.00140926	0.09412	PR1
CSTB	21:43781951:G:A	4.96771e-12	-0.448202	0.0603797	1.00134e-07	0.094099	PR1
NRCAM	7:108339799:C:T	6.05147e-07	0.457308	0.0882009	0.00117738	0.0938998	PR2
NPTX1	17:80776866:G:A	1.4978e-06	1.1263	0.22609	0.00329359	0.0938277	NR1
SPINK6	5:148161645:T:C	9.07967e-06	-0.438582	0.0958798	0.00783101	0.0938044	PR1
SERPINB8	18:63980661:C:T	1.30396e-07	-0.449318	0.0815964	0.000235395	0.0937463	PR1
F7	13:113110921:G:A	1.74353e-17	-0.572887	0.0604261	2.07781e-12	0.0933934	NR1
CLSTN2	3:139916951:G:A	1.32819e-05	0.82316	0.183655	0.0146281	0.093277	NR1
ARSA	22:50570421:A:G	1.59595e-06	0.916601	0.184479	0.00291775	0.0932515	NR2
LAIR1	19:54343711:C:A	5.83474e-10	0.889788	0.135438	6.21977e-06	0.0932332	PR2
CRTAM	11:122868010:T:C	3.36124e-06	-0.675526	0.140709	0.00573318	0.0931575	NR1
MATN2	8:97996963:A:G	4.30809e-08	0.431527	0.0752715	0.000115386	0.0930848	PR1
IGF2R	6:160073489:C:T	3.57946e-09	0.570505	0.0916868	1.54952e-05	0.0930365	PR1
IL17RA	22:17142785:T:C	5.10007e-09	0.531613	0.0864607	1.82554e-05	0.0930111	NR1
TGFBI	5:136073435:G:A	6.89361e-18	-0.431335	0.044806	9.39235e-13	0.0929369	NR1
TNFSF14	19:6665009:T:C	3.84526e-09	0.848852	0.136806	2.32137e-05	0.0928617	NR2
CXCL12	10:44283379:T:A	2.92277e-05	0.896525	0.208901	0.025636	0.0928364	NR1
CD160	1:145861639:C:T	7.94271e-10	0.43128	0.0663174	4.9009e-07	0.0927566	NR2
RSPO1	1:37544462:A:G	2.55036e-07	0.74364	0.138667	0.000561268	0.0926685	NR1
ICOSLG	21:44230948:G:A	4.47001e-07	0.765371	0.145854	0.00138561	0.0924669	PR1
LBP	20:38349567:G:A	3.72546e-11	0.861333	0.122021	3.86336e-07	0.0923247	NR1
SIGLEC6	19:51523346:T:G	1.99444e-06	-0.449663	0.0914297	0.00509604	0.0921544	NR1
SF3B4	1:150585817:T:A	4.71868e-05	0.616684	0.147783	0.00808991	0.0921371	NR1
CD8A	2:86638016:G:A	7.71086e-07	0.63597	0.124021	0.00063229	0.0919482	NR2
FUT8	14:65366781:C:T	2.14501e-08	-0.53849	0.0917456	7.90041e-05	0.0918949	NR2
CGREF1	2:27040254:T:C	1.26536e-06	-0.431919	0.0860429	0.0015507	0.0918641	NR2
IL17D	13:20729945:G:A	1.28163e-05	-0.427982	0.0953067	0.0138624	0.0915626	NR1
DDR1	6:30835477:A:T	4.61858e-08	-0.437444	0.0764911	0.000531536	0.0914823	PR1
ADA	20:44492042:C:T	6.15489e-09	0.771916	0.1261	2.86071e-05	0.0914663	PR2
CCL15	17:35999179:A:C	3.42391e-08	-0.618582	0.107036	0.000110521	0.0914468	PR1
LILRA5	19:54316893:G:A	2.78344e-07	-0.507259	0.0949143	0.000911007	0.0913532	NR1
CPXM1	20:2810695:A:T	3.24857e-14	-0.747361	0.090409	1.1235e-09	0.0912553	NR1
PDCD1LG2	9:5514839:T:C	7.39656e-07	0.42786	0.0832182	0.00229462	0.0912285	PR2
VEGFA	6:43957870:G:A	2.34519e-12	-0.443061	0.0587321	3.81625e-08	0.0911719	NR1
SORCS2	4:7220526:G:A	2.81775e-07	-0.440965	0.0824925	0.00124243	0.0910847	PR1
SPINK5	5:148131899:A:G	6.64676e-08	0.435477	0.0771834	0.000132304	0.0910273	NR2
PBLD	10:68276805:C:T	2.30239e-08	0.529161	0.090323	7.53541e-05	0.091001	PR1
S100P	4:6002590:G:A	1.58544e-05	-0.598665	0.134727	0.0441163	0.0909976	PR2
ITGB6	2:160111497:A:T	7.88131e-06	0.431553	0.0936304	0.0109799	0.0908217	PR2
PRKAB1	12:120398546:T:A	3.35845e-05	-0.528557	0.124092	0.0285561	0.0907934	PR1
DRAXIN	1:11692083:G:A	4.92748e-08	-0.852841	0.149586	0.000132601	0.0905132	NR1
CCN4	8:133190699:C:A	1.0089e-07	0.459544	0.0827202	0.000390672	0.0903842	NR1
CHI3L1	1:203186754:G:C	1.12477e-08	0.596299	0.0993227	5.61419e-05	0.0902798	PR2
TYMP	22:50541642:G:A	7.0298e-09	0.464411	0.076301	2.94614e-05	0.0901393	NR1
BPIFB1	20:33101062:G:C	6.39652e-07	-0.445327	0.0861652	0.000878932	0.0900806	NR2
CLEC11A	19:50708409:G:T	3.24763e-06	1.00144	0.208057	0.00816157	0.0900589	PR2
PROK1	1:110450727:G:A	2.83732e-09	0.551491	0.0879455	2.02173e-05	0.0900271	PR2
SIGLEC6	19:51534343:A:G	4.96402e-06	0.495634	0.105167	0.00972293	0.0898758	NR2
NCR1	19:54901304:C:A	7.47535e-07	-0.613083	0.11935	0.0019967	0.0898281	PR1
MLN	6:33807864:A:G	3.98603e-08	-0.429021	0.0745898	0.00023716	0.0897591	PR2
AGRN	1:1025561:G:C	2.12409e-11	-0.45688	0.0637965	1.25323e-07	0.0897429	NR2
GZMB	14:24659508:T:A	5.95412e-07	-0.668342	0.128931	0.00134636	0.0894188	NR2
SUSD2	22:24175884:G:A	8.74163e-09	0.83119	0.137479	2.81581e-05	0.0890373	NR2
WIF1	12:64906763:G:C	9.4576e-06	-0.431873	0.0946113	0.00800193	0.08896	PR1
SELPLG	12:108574117:G:A	6.50947e-06	-0.779496	0.167623	0.00824627	0.088917	NR2
NT5E	6:85696953:T:C	5.02017e-08	-0.508806	0.0891846	0.00021491	0.0888184	PR2
TGFB1	19:41341955:G:A	3.10848e-07	-0.816104	0.153371	0.000566006	0.0887684	NR1
F7	13:113115325:T:G	1.15406e-17	-0.535836	0.0560233	1.09176e-12	0.0887662	PR1
ALPP	2:232462498:G:A	3.8768e-09	0.421832	0.0680228	2.52755e-05	0.0887371	NR1
S100A16	1:153428633:A:G	9.47372e-05	-0.619183	0.154903	0.0398377	0.0887033	PR1
HSPB1	7:76294901:G:T	6.62029e-06	-0.485404	0.104469	0.00732764	0.0886577	NR2
SHMT1	17:18337432:C:G	1.72789e-13	0.427452	0.0534371	3.33175e-09	0.0886305	PR1
TNFSF14	19:6665009:T:C	3.31778e-10	0.829241	0.124457	2.65903e-06	0.0886205	NR1
IL19	1:207098927:T:A	2.55591e-05	0.695167	0.160626	0.0243336	0.0886012	PR2
IL4R	16:27327703:T:C	9.60481e-06	-0.469129	0.102855	0.0144515	0.0882476	PR1
PDCD5	19:32673853:C:T	5.52699e-09	-0.462533	0.0753938	2.79346e-05	0.0880531	NR2
NCR1	19:54901875:G:A	5.15909e-07	-0.718035	0.137576	0.00252158	0.0880183	PR2
HS3ST3B1	17:13933638:G:A	4.16642e-06	0.429486	0.0903791	0.00941021	0.0879506	NR1
RET	10:42843993:A:G	6.84191e-08	-0.601461	0.106659	0.000203283	0.0878183	PR1
KLK8	19:51002840:G:C	5.1805e-09	-0.927745	0.150917	3.12291e-05	0.0877009	NR2
MASP1	3:186361834:G:T	3.32511e-05	-0.689657	0.161895	0.0437745	0.0875578	NR1
CCL26	7:75805330:C:T	1.11173e-05	-1.15291	0.25461	0.0106898	0.0873904	PR2
RET	10:42857446:T:C	1.67089e-07	-0.563146	0.103182	0.000526477	0.0873525	PR2
NPTXR	22:38845504:A:G	3.41764e-06	0.488512	0.101777	0.00470013	0.087265	PR1
NID2	14:52024937:T:C	3.85915e-11	0.45582	0.0646315	5.40592e-07	0.0872642	NR1
RBP5	12:7135290:A:C	5.38247e-10	0.513324	0.0779564	3.46024e-06	0.0872536	PR2
LRPAP1	4:3499799:G:C	7.34208e-07	-0.808877	0.157448	0.00164628	0.0872032	NR1
EFNA1	1:155157915:G:A	7.62308e-09	-0.438905	0.0722764	2.29598e-05	0.0871999	NR2
MFGE8	15:88918765:T:G	1.42914e-07	0.452359	0.0824931	0.000345566	0.087179	NR1
DRAXIN	1:11692083:G:A	1.23666e-07	-0.836947	0.151763	0.000298634	0.0871709	NR2
PLXDC1	17:38911586:G:A	1.34164e-05	-0.429168	0.095803	0.0112338	0.0869678	NR1
MYOC	1:171633236:G:A	1.35218e-07	0.696084	0.126582	0.00037319	0.0868097	PR1
DNER	2:229680267:T:C	2.63725e-07	-0.525685	0.0981535	0.000696165	0.0867153	NR1
FCRL5	1:157558612:G:A	9.79027e-07	-0.4984	0.098146	0.0016173	0.0866662	PR1
MARCO	2:118983428:C:T	1.32973e-08	-0.493831	0.0828275	4.98549e-05	0.0865807	NR1
IL5RA	3:3112912:G:A	4.40015e-06	0.493721	0.10417	0.0108487	0.0865421	NR1
GALNT2	1:230171476:T:G	7.52987e-06	0.439852	0.0952108	0.0146035	0.0865419	PR2
HLA-E	6:30490287:G:A	2.58932e-06	0.420528	0.0864827	0.00999985	0.0865217	PR1
OSCAR	19:54073506:G:A	7.06113e-09	0.417112	0.0685199	2.94995e-05	0.0864765	NR2
KLK13	19:51035305:G:T	1.79774e-05	-0.433521	0.0982629	0.0264528	0.086459	PR1
IL22RA1	1:24141941:G:C	1.39327e-05	-0.497597	0.111246	0.0144432	0.0863871	PR1
FCRL5	1:157570314:T:G	1.16526e-06	-0.432962	0.0859585	0.00179164	0.0862717	NR1
MERTK	2:112014626:A:G	3.3825e-07	-0.421313	0.0793902	0.00054168	0.0862611	PR1
CCL14	17:35983666:A:G	3.31663e-15	-0.803998	0.0929945	1.28393e-10	0.0861544	NR2
SPINK5	5:148131899:A:G	1.35354e-09	0.423464	0.0661533	5.9601e-06	0.0860744	NR1
PDCD5	19:32582525:G:A	4.48421e-09	0.4649	0.0753071	2.4416e-05	0.0860578	NR1
CGREF1	2:27256675:C:T	3.69797e-07	-0.80666	0.152476	0.000796867	0.0854823	PR2
HBQ1	16:231300:G:A	1.0308e-09	0.501173	0.0775962	4.90341e-06	0.0854333	PR1
CTSB	8:11852792:A:G	2.19271e-07	0.442821	0.0820878	0.000714538	0.0854109	NR1
LAT2	7:73652568:T:A	4.91873e-05	0.894952	0.214972	0.0180047	0.0852651	NR2
MZB1	5:139439484:T:C	6.85045e-06	0.429019	0.0925083	0.00422967	0.0852303	NR1
HAVCR1	5:157042315:G:A	6.17683e-09	-0.456836	0.074637	4.16314e-05	0.0851163	PR2
GLO1	6:38682852:T:G	2.28004e-08	-0.419405	0.0715247	0.000121931	0.084997	PR2
MARCO	2:118970896:C:T	6.4003e-09	-0.4736	0.0774632	3.24358e-05	0.0849853	PR2
CTSB	8:11849518:A:G	4.9046e-07	0.418951	0.080177	0.00140696	0.0849327	NR2
ALPP	2:232436825:T:C	6.89317e-09	0.491021	0.0805992	4.34559e-05	0.0849292	NR2
PFKFB2	1:207077111:C:T	7.27327e-09	-0.418307	0.0686991	3.16868e-05	0.0848787	PR2
CD207	2:70353685:G:A	2.31229e-05	-0.488598	0.112298	0.0241332	0.0846518	PR1
HAVCR1	5:156989695:G:T	5.34834e-08	0.43333	0.0761673	0.000179639	0.0846225	PR1
OSMR	5:38852470:C:T	1.64774e-12	-0.447159	0.0586711	3.63689e-08	0.0845604	PR2
MCFD2	2:46914826:A:G	1.17813e-06	0.511185	0.101516	0.00358117	0.0844198	NR2
SMOC2	6:168424579:C:T	1.60599e-09	-0.45693	0.0717427	1.58553e-05	0.0840878	NR1
LRPAP1	4:3499799:G:C	1.62133e-06	-0.79411	0.159938	0.00296179	0.0840483	NR2
CNTNAP2	7:145494136:C:T	9.38609e-07	0.472591	0.0929348	0.00143056	0.0840389	NR2
CEACAM1	19:42555447:T:C	4.02435e-08	-0.563946	0.0982118	4.78652e-05	0.0839269	NR1
CNTN5	11:99178378:A:C	1.35015e-06	-0.420361	0.0839791	0.0032225	0.0838533	NR2
CCN5	20:44674601:C:T	1.86242e-06	0.410594	0.083178	0.00289077	0.0837738	PR1
GALNT10	5:154182786:G:A	5.47366e-06	-0.411405	0.0877131	0.00770875	0.0837368	NR2
HS3ST3B1	17:14303006:T:C	9.46748e-06	-0.482146	0.10563	0.0166507	0.0837309	PR1
MYOC	1:171652996:G:A	2.84078e-07	-0.689377	0.129065	0.000640647	0.0835874	NR2
EPS8L2	11:706284:G:T	6.0303e-07	-0.505415	0.0975518	0.00136246	0.0833007	NR2
THOP1	19:2787331:G:A	1.28686e-08	0.432074	0.0723709	5.30463e-05	0.083289	NR2
MZB1	5:139439484:T:C	2.55364e-05	0.423899	0.098004	0.0117893	0.0832081	NR2
B4GAT1	11:66349640:C:T	1.05093e-07	-0.468166	0.0842938	0.000239823	0.0830462	PR2
GGT5	22:24486017:G:C	2.65491e-05	0.47471	0.109923	0.033495	0.0830119	PR2
CD209	19:7720812:T:C	3.91402e-05	0.44029	0.104346	0.0442767	0.082969	NR1
CEACAM5	19:41044135:C:A	4.17349e-05	0.831448	0.197796	0.0218603	0.0829476	NR1
CRTAM	11:122890217:C:T	1.71421e-05	-0.743466	0.16808	0.0195119	0.0824317	PR1
COL9A1	6:70469082:G:A	4.27592e-06	-0.411341	0.0866687	0.00471555	0.0823225	NR1
TIE1	1:43682497:T:C	3.3417e-06	-0.432936	0.0901023	0.00328285	0.0821849	PR1
NT5E	6:85406824:A:G	1.93551e-06	-0.616891	0.125187	0.00280898	0.0821228	PR1
SCARA5	8:27947867:G:A	1.48902e-09	-0.50736	0.0794063	9.28378e-06	0.0820486	PR1
KIRREL2	19:35951215:T:C	9.71064e-06	-0.764412	0.16763	0.0138245	0.0819843	PR2
GPC1	2:240464000:T:G	2.3119e-05	0.751877	0.172808	0.0312307	0.0818202	PR1
PXN	12:120229296:G:T	2.6661e-06	0.496012	0.102184	0.00407488	0.0817051	NR2
CCL22	16:57355879:A:G	9.96494e-06	0.683135	0.150007	0.021886	0.0816467	PR2
ARSB	5:78883919:G:A	3.68684e-06	-0.417215	0.0872021	0.00648745	0.0815375	PR2
CXADR	21:17462928:A:G	7.9592e-06	-0.433488	0.094181	0.00970283	0.0815002	NR1
ATP5IF1	1:28257988:G:A	3.73648e-05	0.432483	0.102216	0.0174187	0.0814695	NR1
LAIR1	19:54344298:C:A	1.42086e-09	-0.51596	0.0806405	9.2536e-06	0.0814386	PR1
ADAMTS8	11:130406182:A:G	9.27135e-07	0.738881	0.145099	0.00269701	0.0814181	PR2
DLK1	14:100715444:A:G	1.35325e-06	0.451804	0.0902328	0.0023161	0.0813715	PR1
MCFD2	2:46947977:G:A	1.36982e-06	-0.48643	0.09726	0.00395647	0.0813418	NR1
NPTX1	17:80564758:C:G	7.46145e-06	0.717471	0.155289	0.012375	0.0812552	PR1
CPA2	7:130203031:G:C	1.69336e-05	0.45558	0.102927	0.01774	0.081244	PR1
CCL23	17:35999179:A:C	3.28829e-05	0.574662	0.134793	0.0265264	0.0812196	NR2
PSG1	19:43765479:T:G	5.65372e-05	-0.587528	0.142243	0.0313367	0.0811855	PR2
SUMF2	7:56293945:C:T	6.83821e-06	-0.71675	0.154454	0.00629874	0.081092	PR1
TNFRSF11A	18:62380256:G:A	3.09829e-11	-0.442916	0.0623827	3.14263e-07	0.0808795	PR1
CA4	17:60422864:T:G	9.35712e-08	-0.712538	0.127905	0.000107324	0.0808064	NR1
SIGLEC10	19:51413952:A:C	8.7895e-07	-0.542643	0.106411	0.00212272	0.0807844	NR2
DPT	1:168727311:G:C	5.45043e-09	0.437379	0.0712832	2.85817e-05	0.080736	NR1
SCGB1A1	11:62308754:G:A	5.91291e-05	0.416922	0.10129	0.0373563	0.0807316	NR1
F7	13:113098850:T:C	1.18969e-18	-0.525177	0.0528542	1.78185e-13	0.0807146	PR2
AFP	4:74399146:G:A	2.44188e-05	0.40314	0.0929699	0.0112961	0.0806433	NR2
CHRDL2	11:74684605:G:C	1.96377e-05	0.405739	0.0924424	0.015519	0.0804916	NR2
KAZALD1	10:101120727:C:T	4.39803e-06	-0.71064	0.149906	0.00491543	0.0803765	NR2
SELPLG	12:108574117:G:A	1.07946e-05	-0.842315	0.185731	0.0156854	0.0802924	PR2
[truncated: 640 more rows]

## Sheet: S Table 5
S Table 5. PheWAS query results for differential cis-pQTLs and their proxy variants (r² > 0.8).
[truncated: 178 more rows]

[truncated: 2 more sheets: S Table 6, S Table 7]
